# Supplementary material for: AACR Project GENIE: 100,000 Cases and Beyond
Source: PubMed Central journal article supplement — Cancer Discov. 2022 Jul 12;12(9):2044–57. doi: 10.1158/2159-8290.CD-21-1547 (PMC9437568; doi:10.1158/2159-8290.cd-21-1547), 2022-07-12
Supplement: cd-21-1547_supplementary_figure_1_suppsf1.pdf [file cd-21-1547_supplementary_figure_1_suppsf1.pdf]

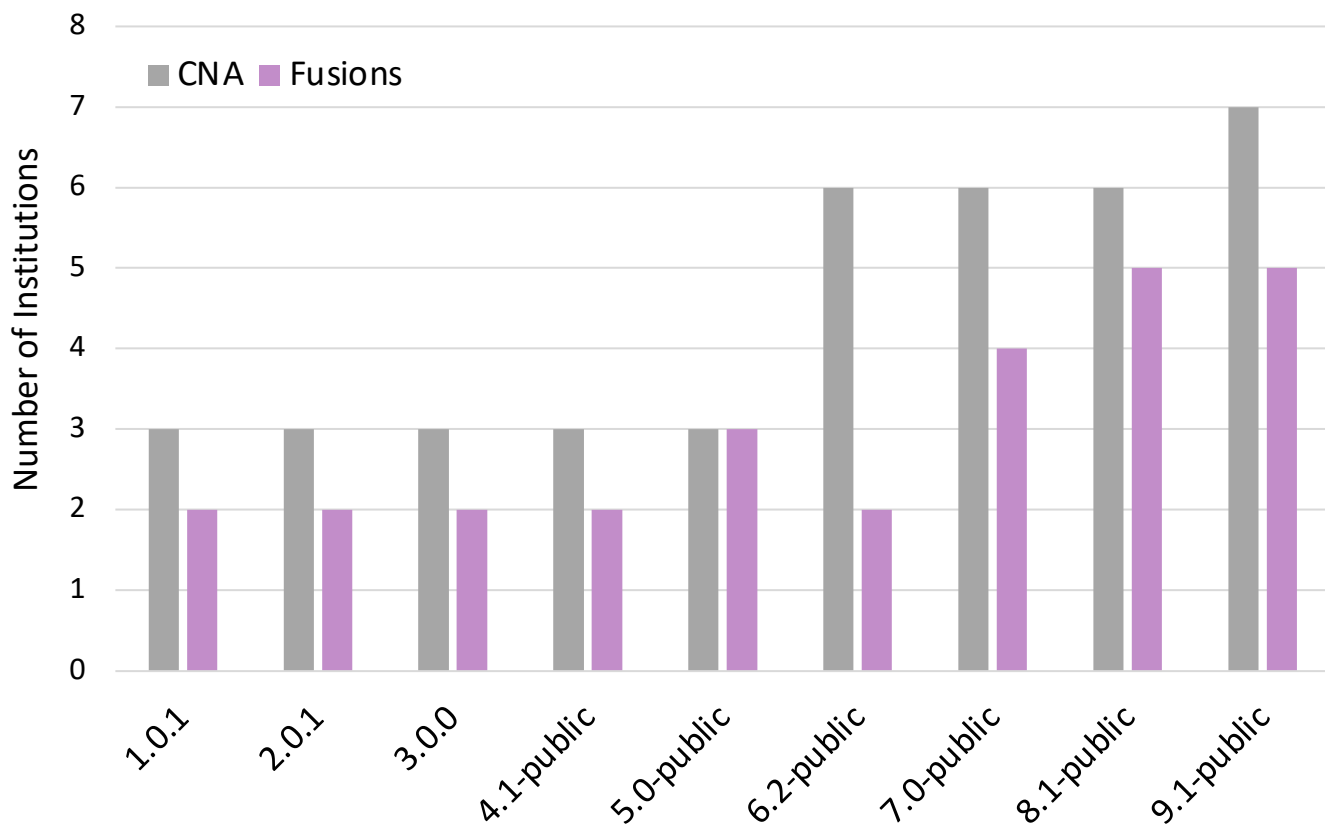

### Supplemental Figure 1: Institutions Providing Copy Number and Fusion Data

The number of institutions providing copy number alteration data (gray bars) has increased from three through the 5.0-public release to seven in the 9.1-public release. Similarly, the number of institutions providing fusion (structural variant) data (purple bars) has steadily increased beginning with the 5.0-public release. The temporary decrease in the 6.2-public release reflected removal of data for QA reasons; these data were returned in subsequent releases.
