# Supplementary material for: AACR Project GENIE: 100,000 Cases and Beyond
Source: PubMed Central journal article supplement — Cancer Discov. 2022 Jul 12;12(9):2044–57. doi: 10.1158/2159-8290.CD-21-1547 (PMC9437568; doi:10.1158/2159-8290.cd-21-1547), 2022-07-12
Supplement: cd-21-1547_supplementary_figure_2_suppsf2.pdf [file cd-21-1547_supplementary_figure_2_suppsf2.pdf]

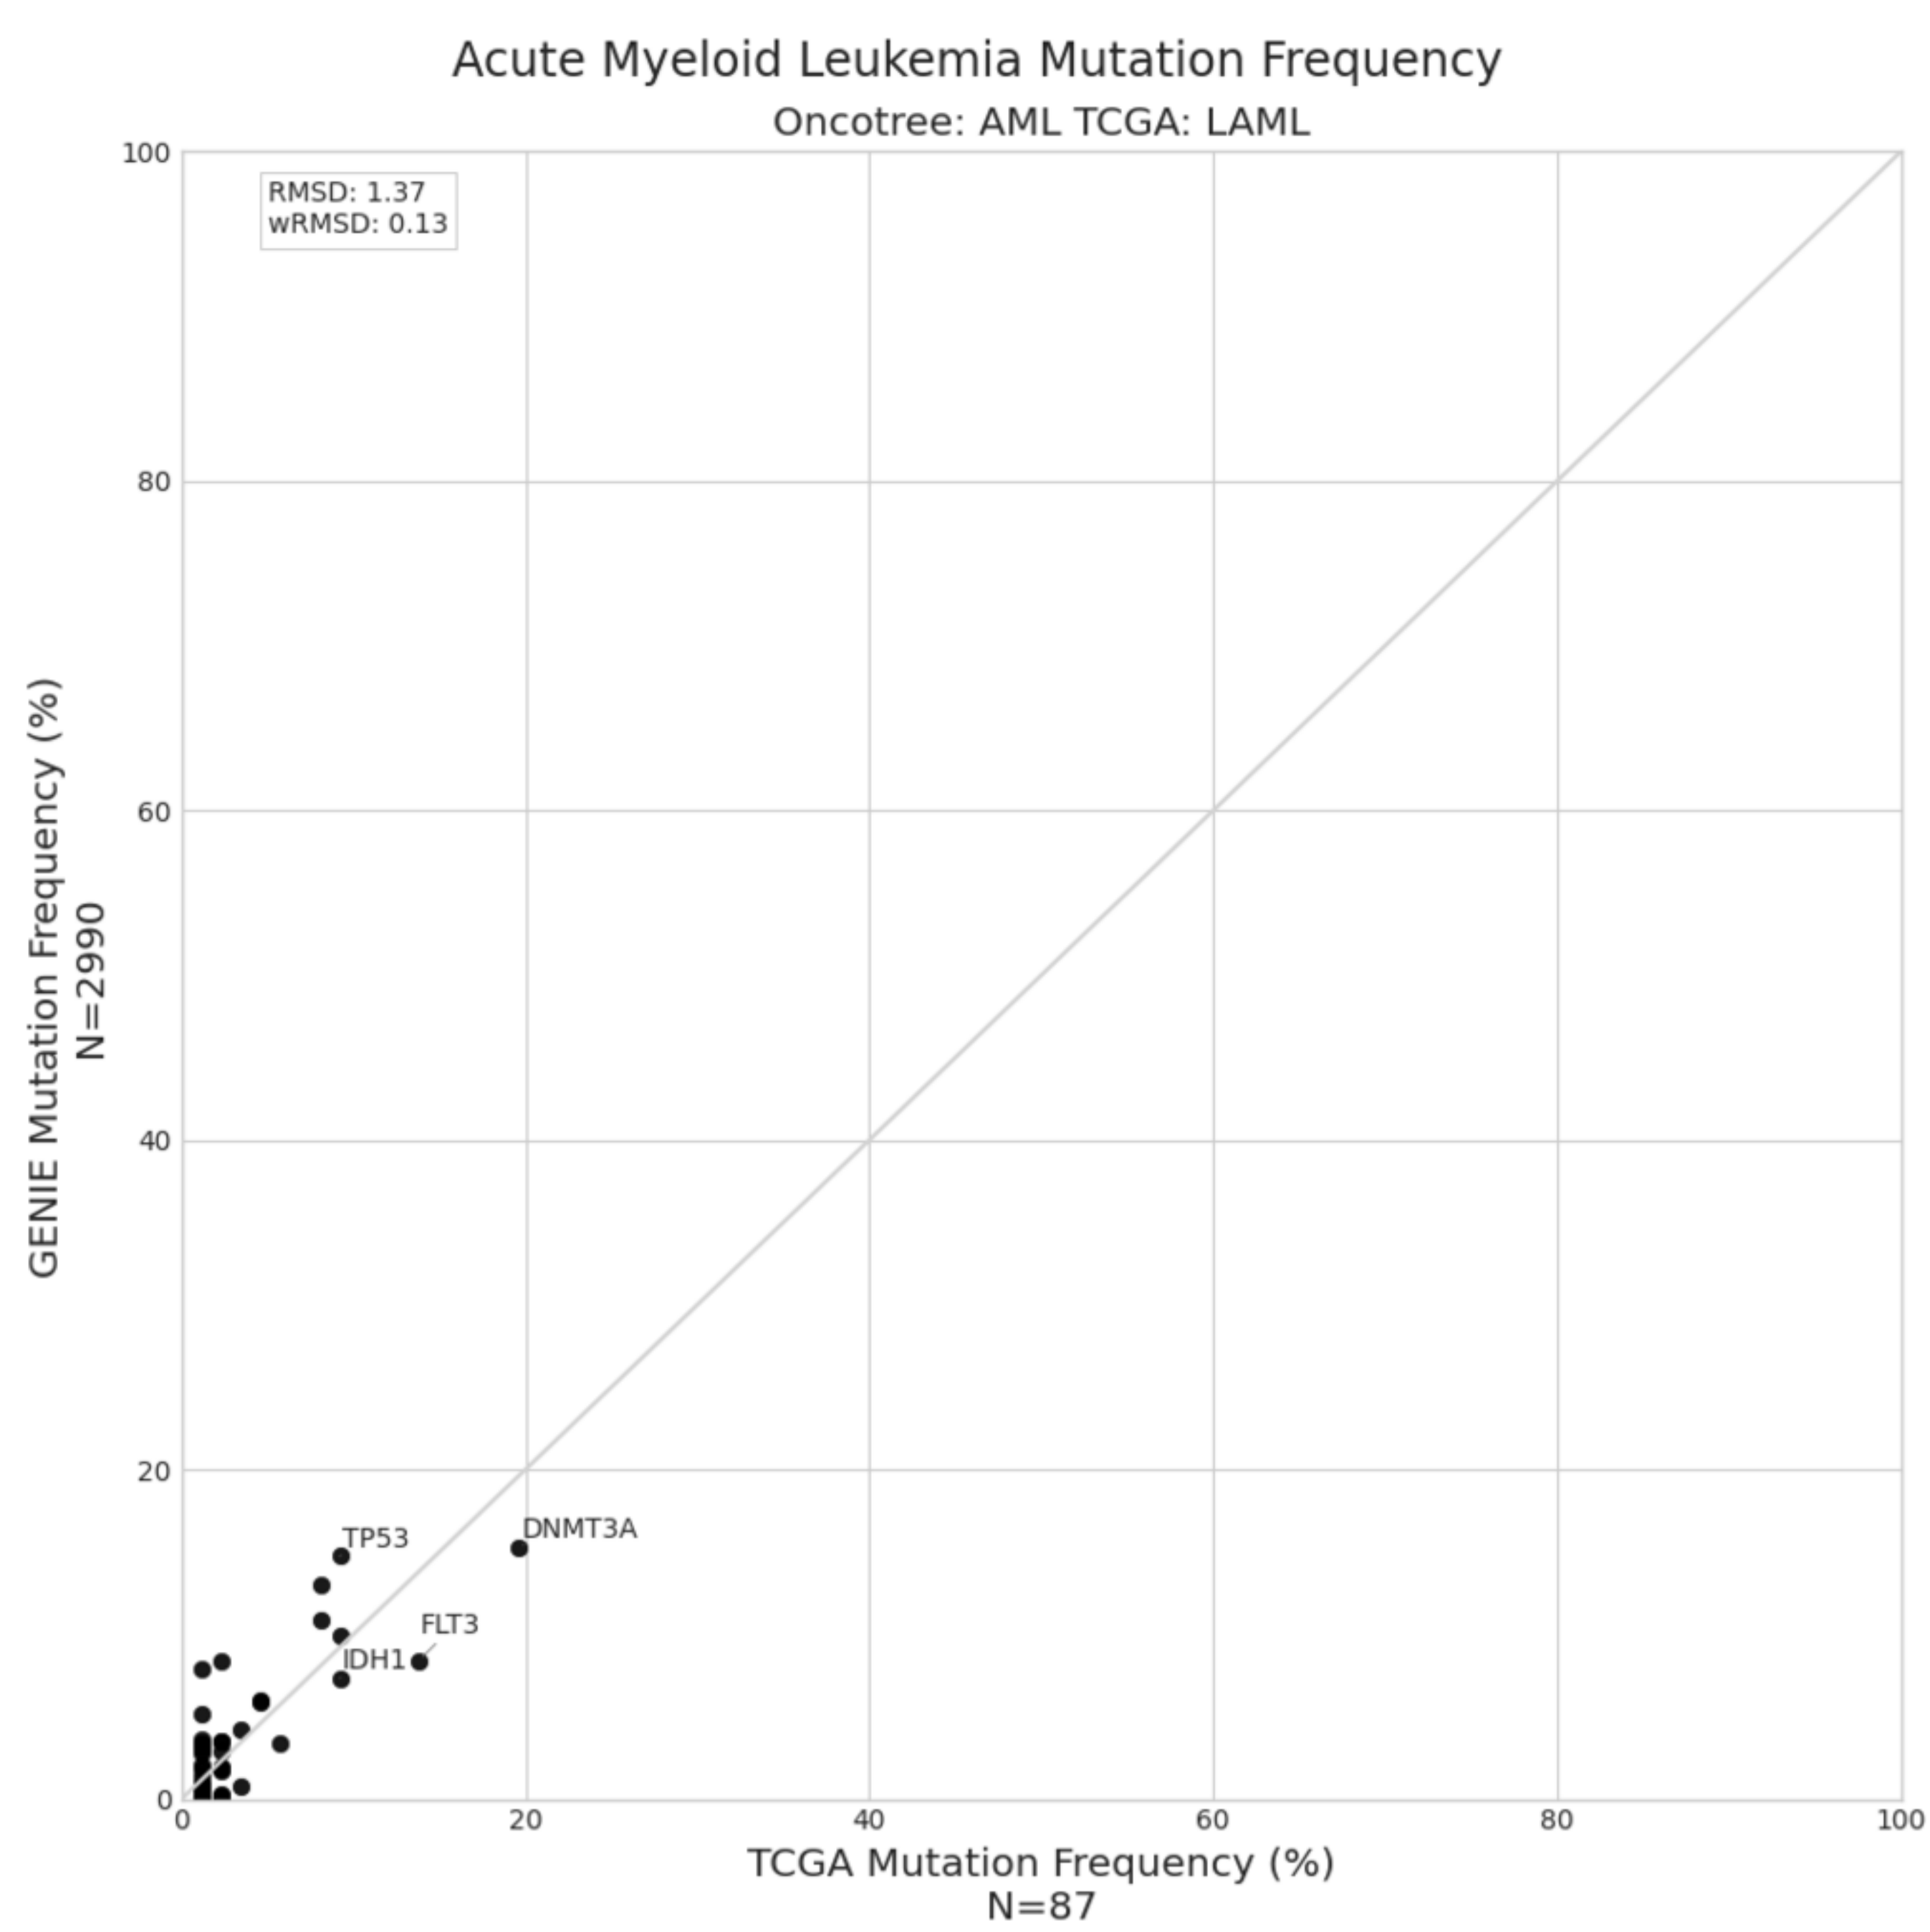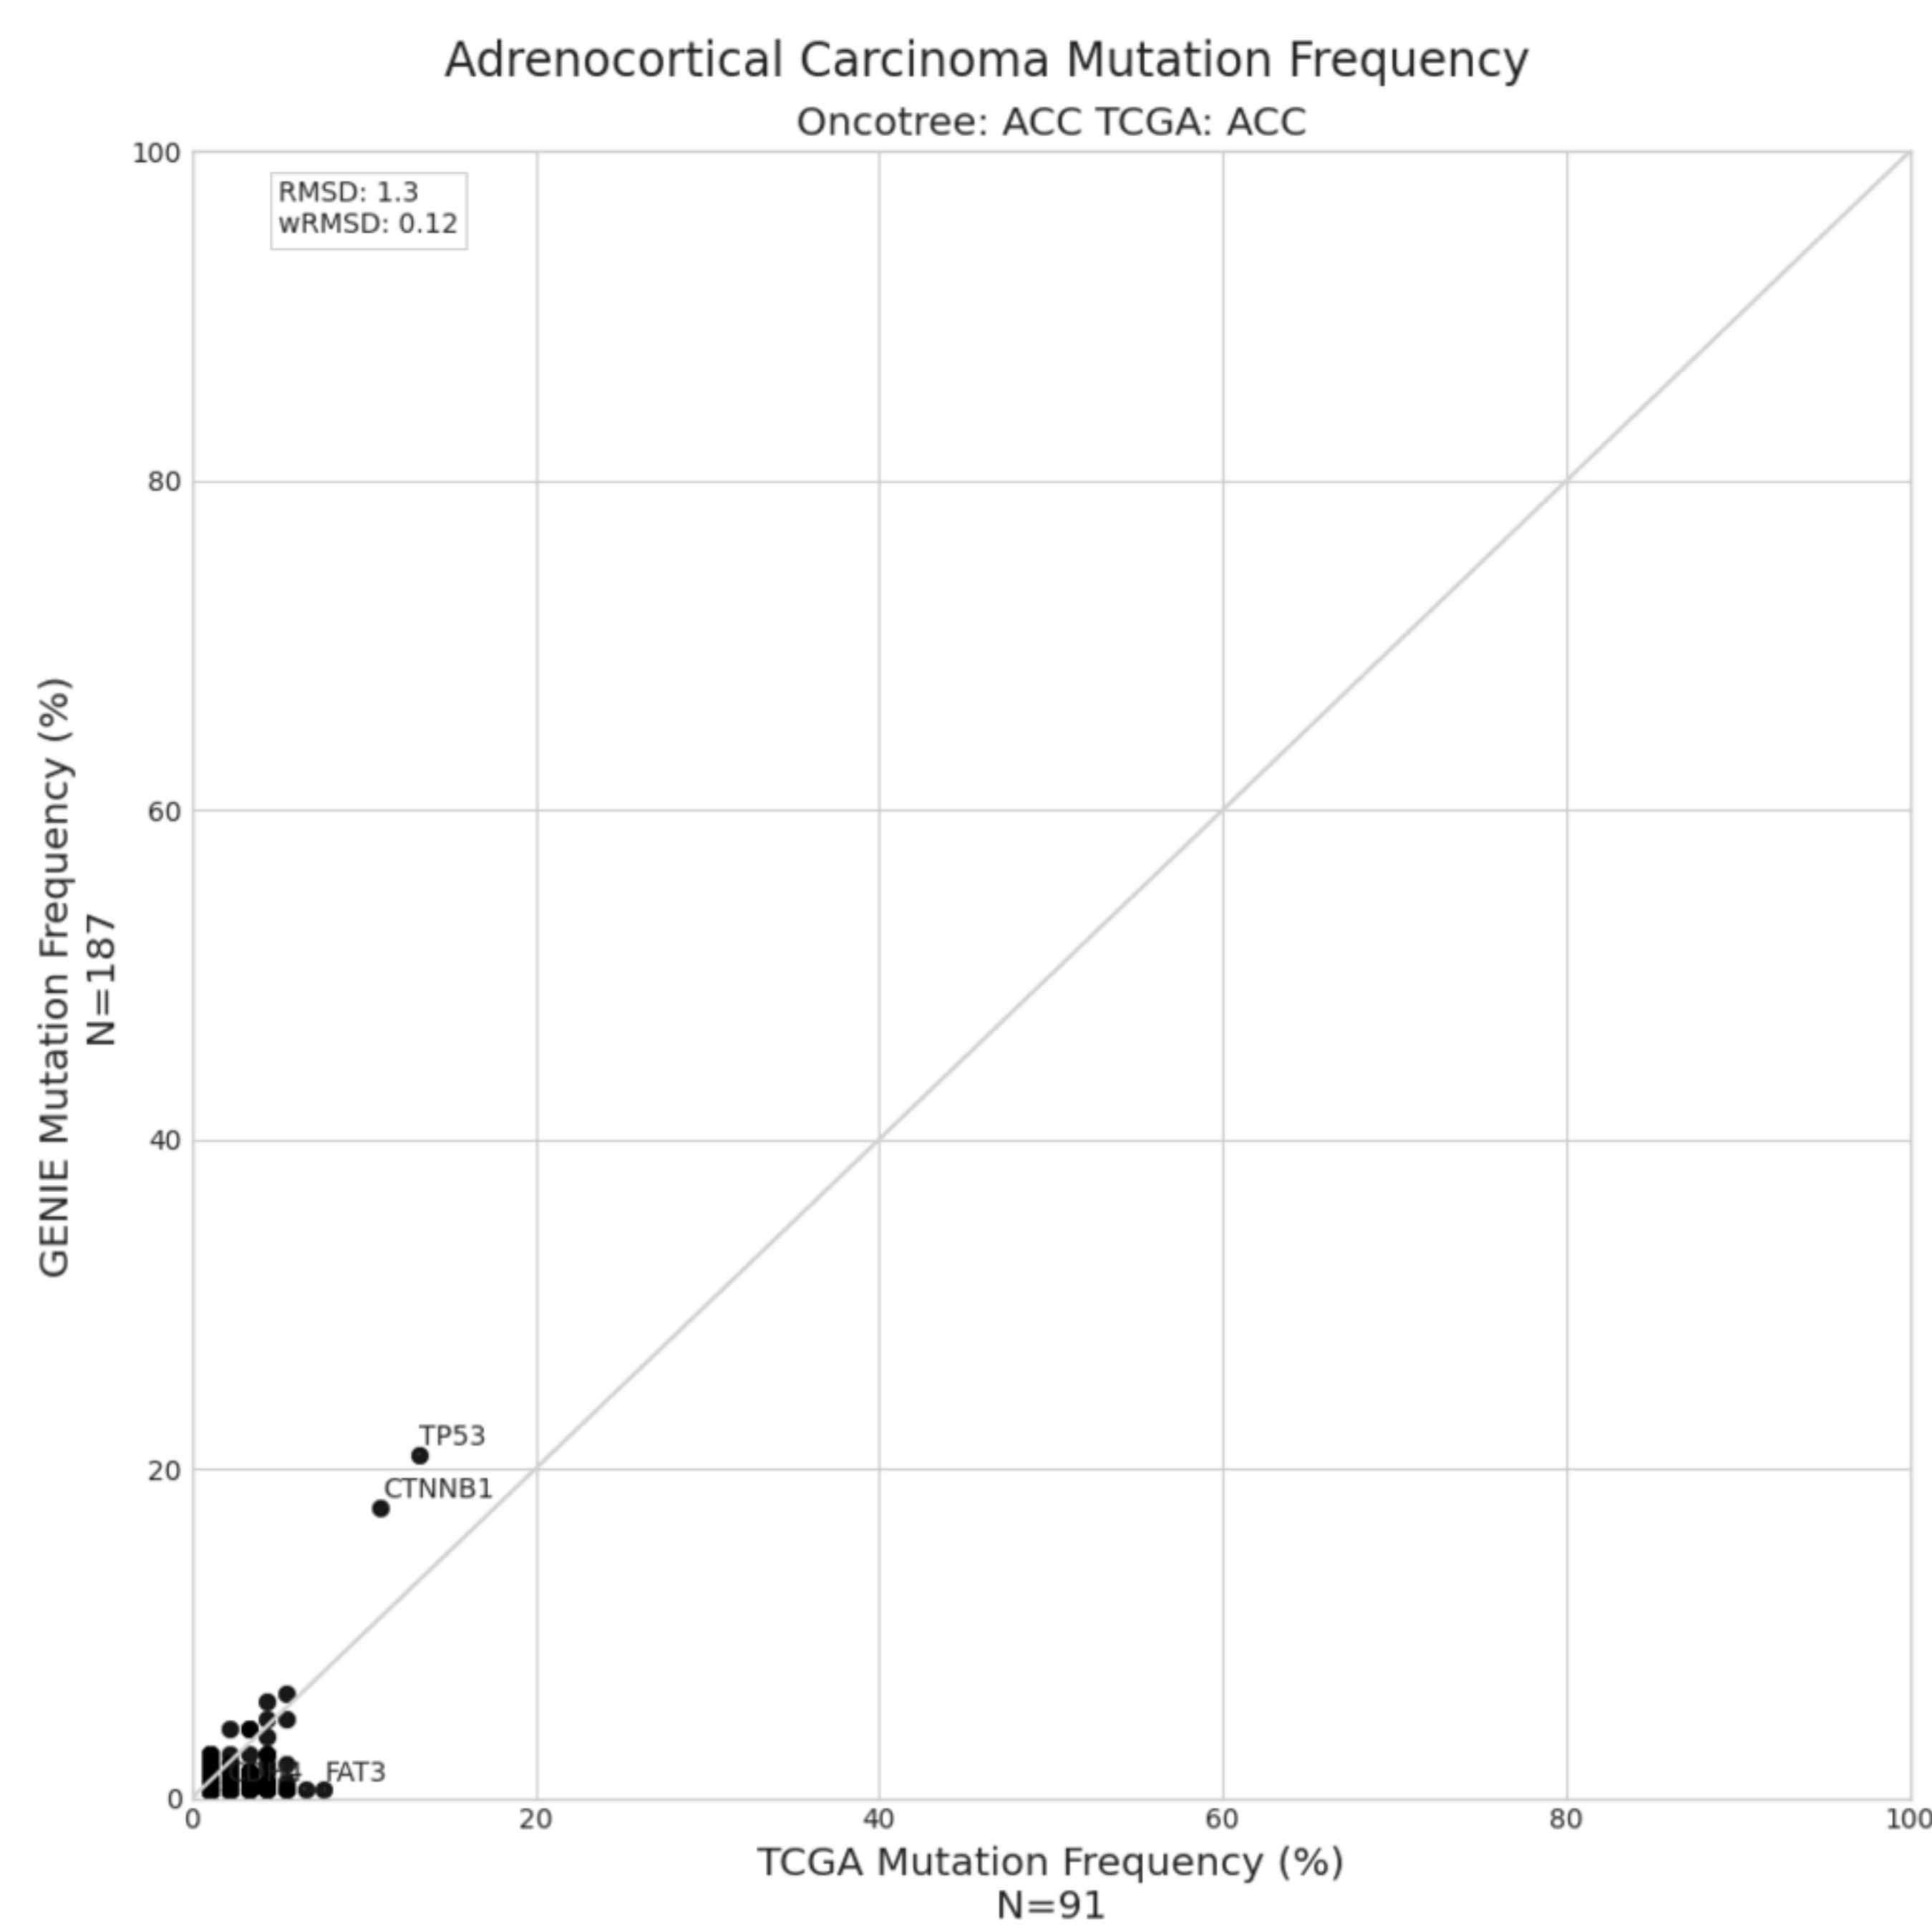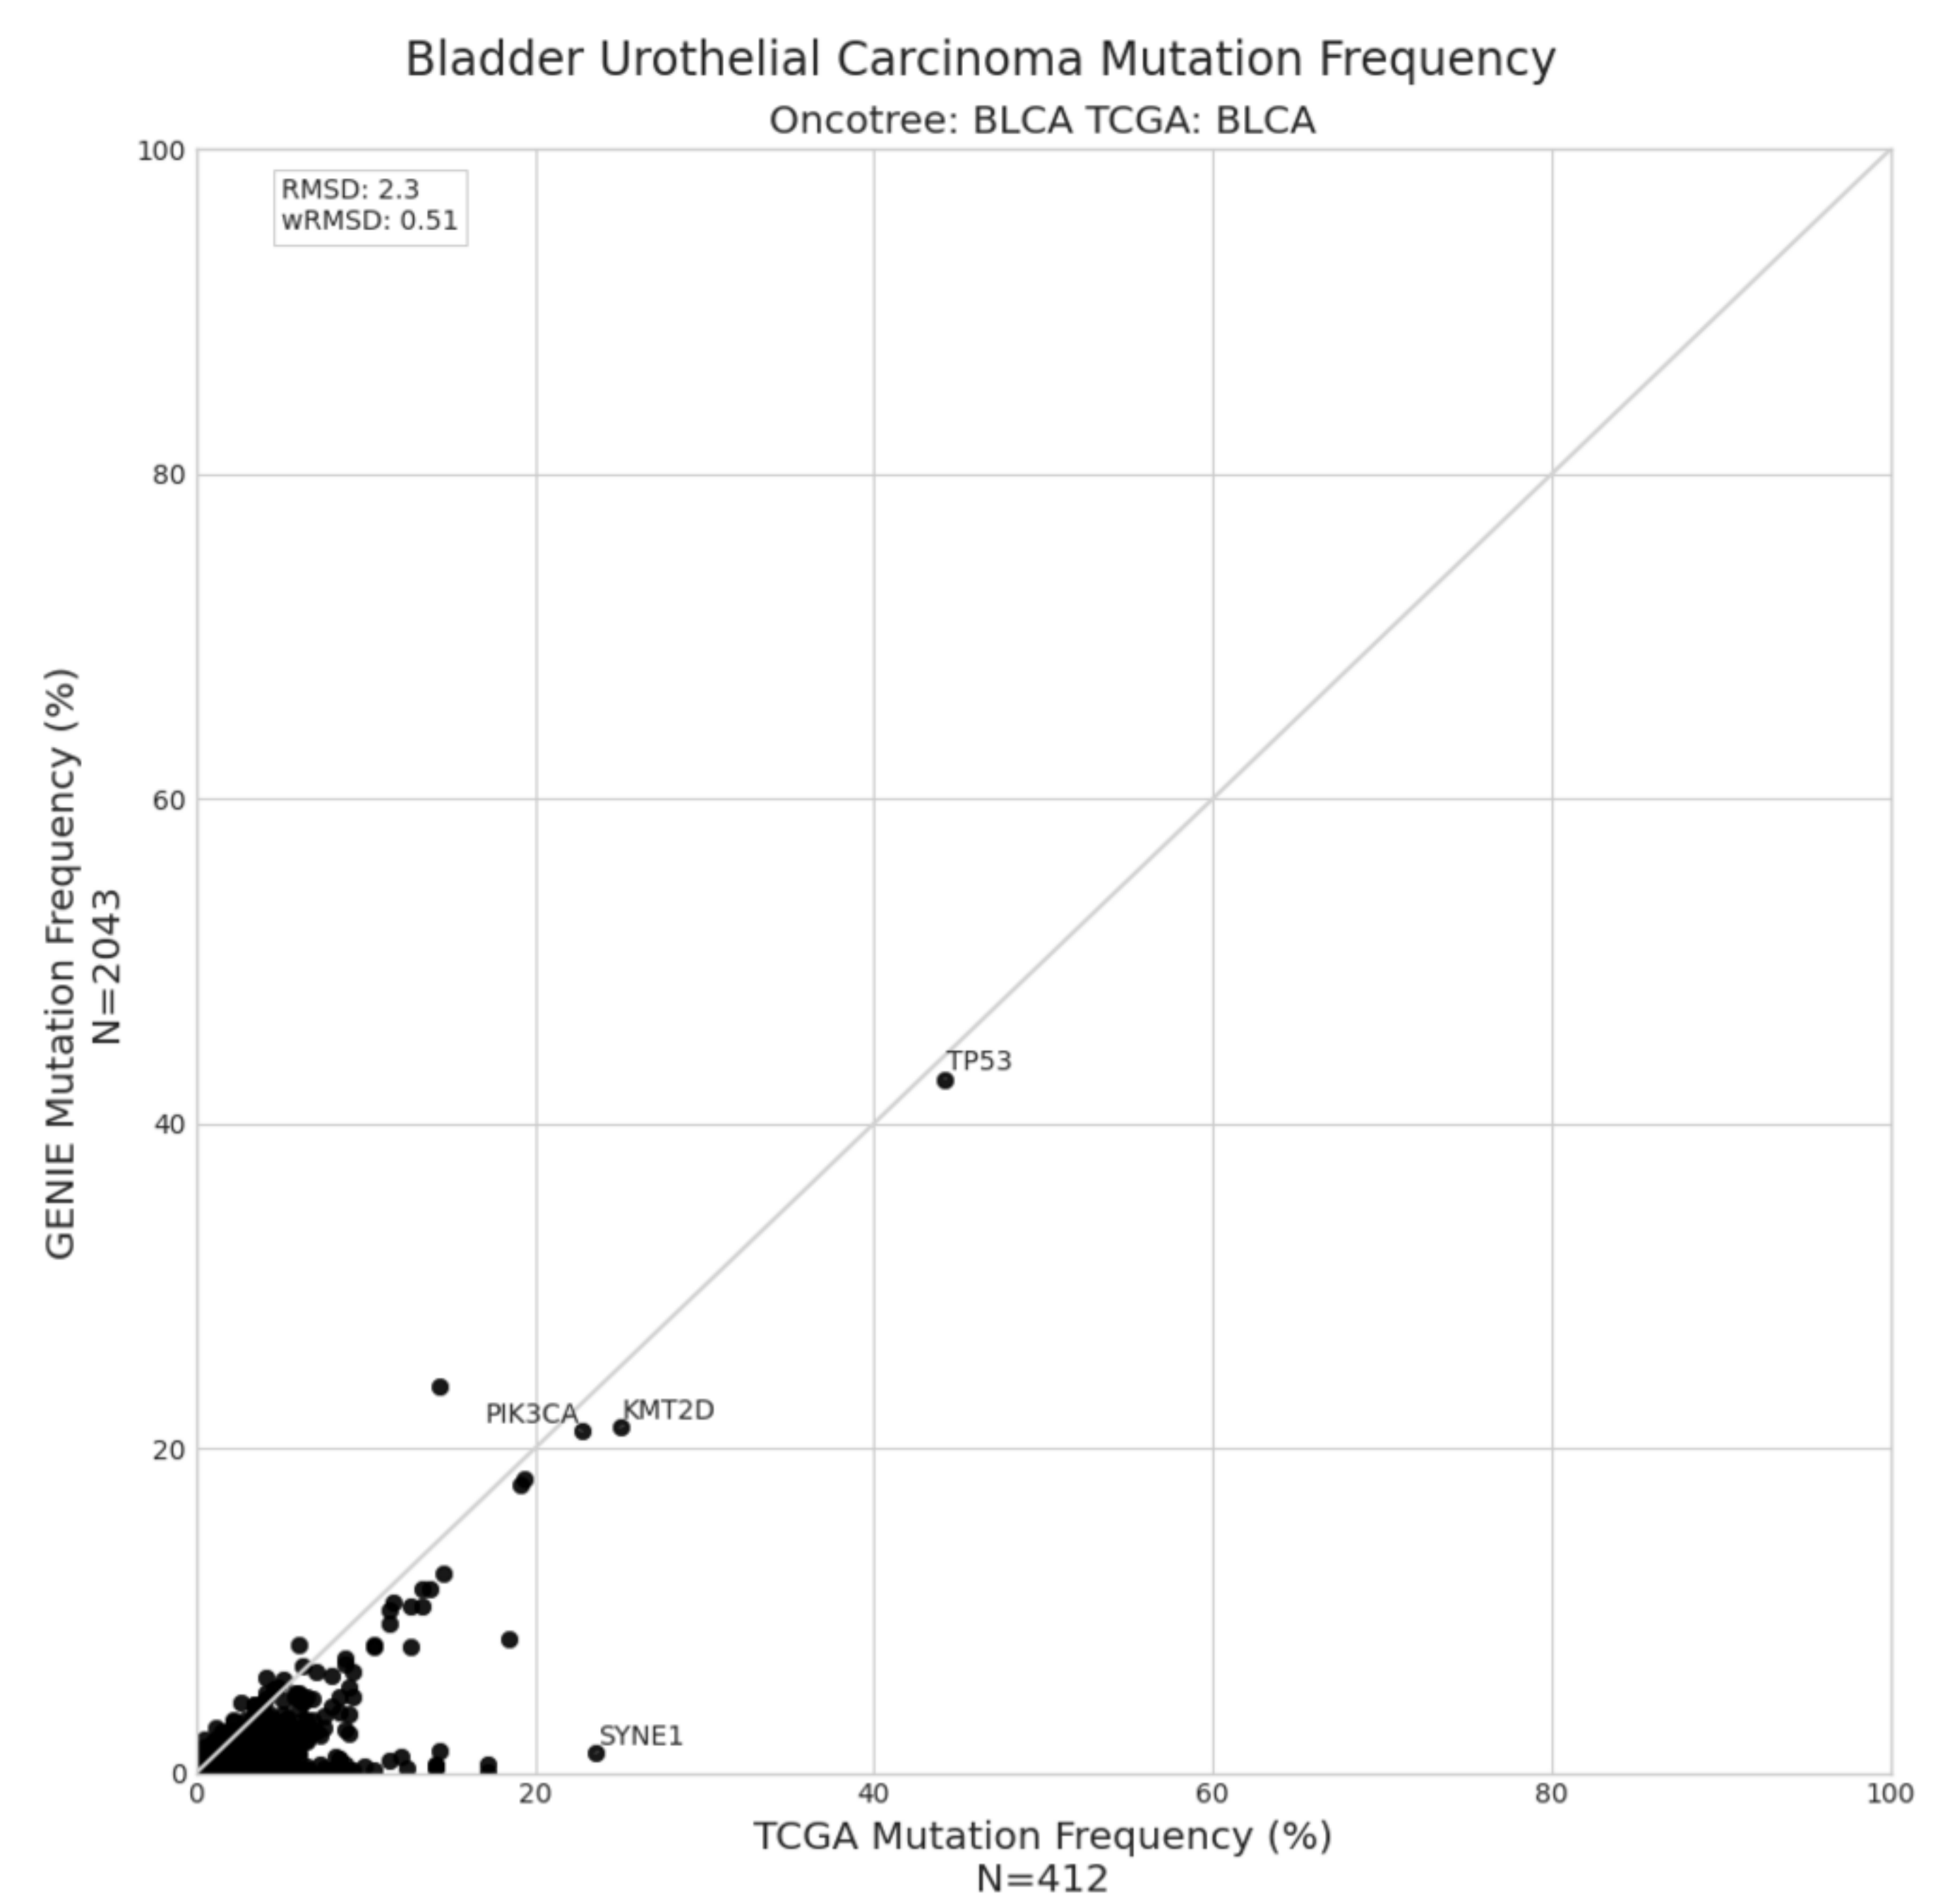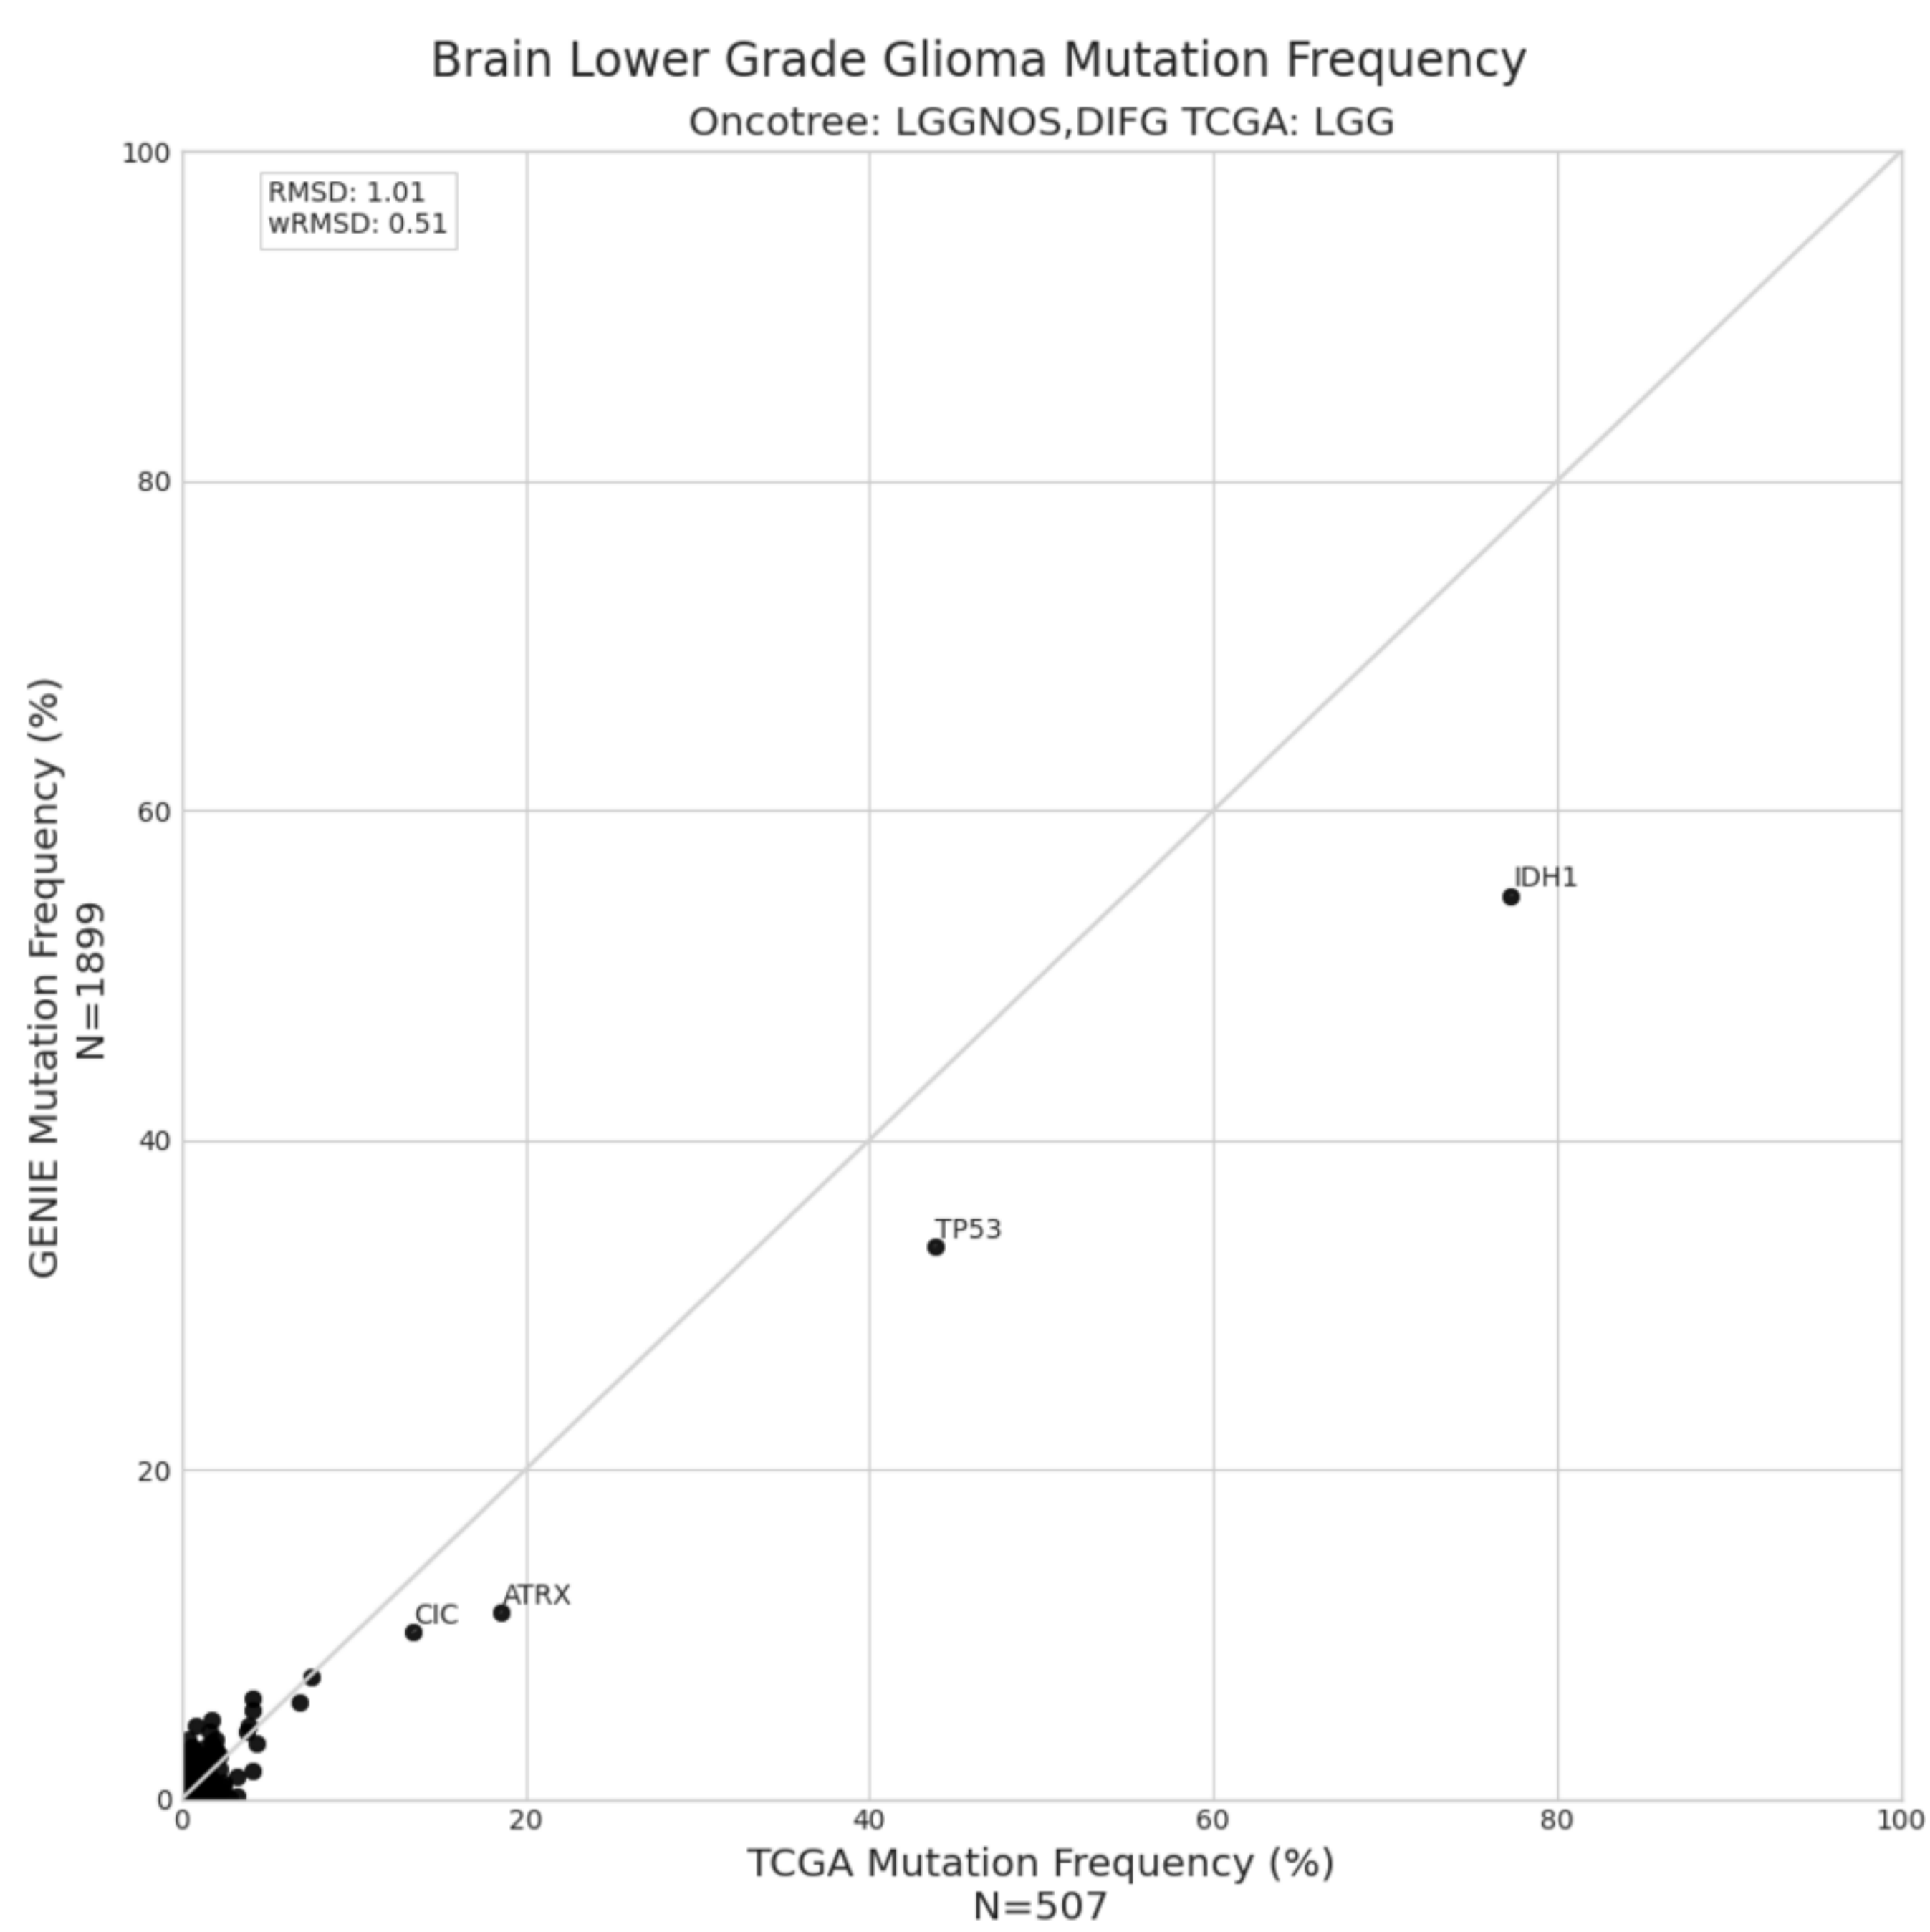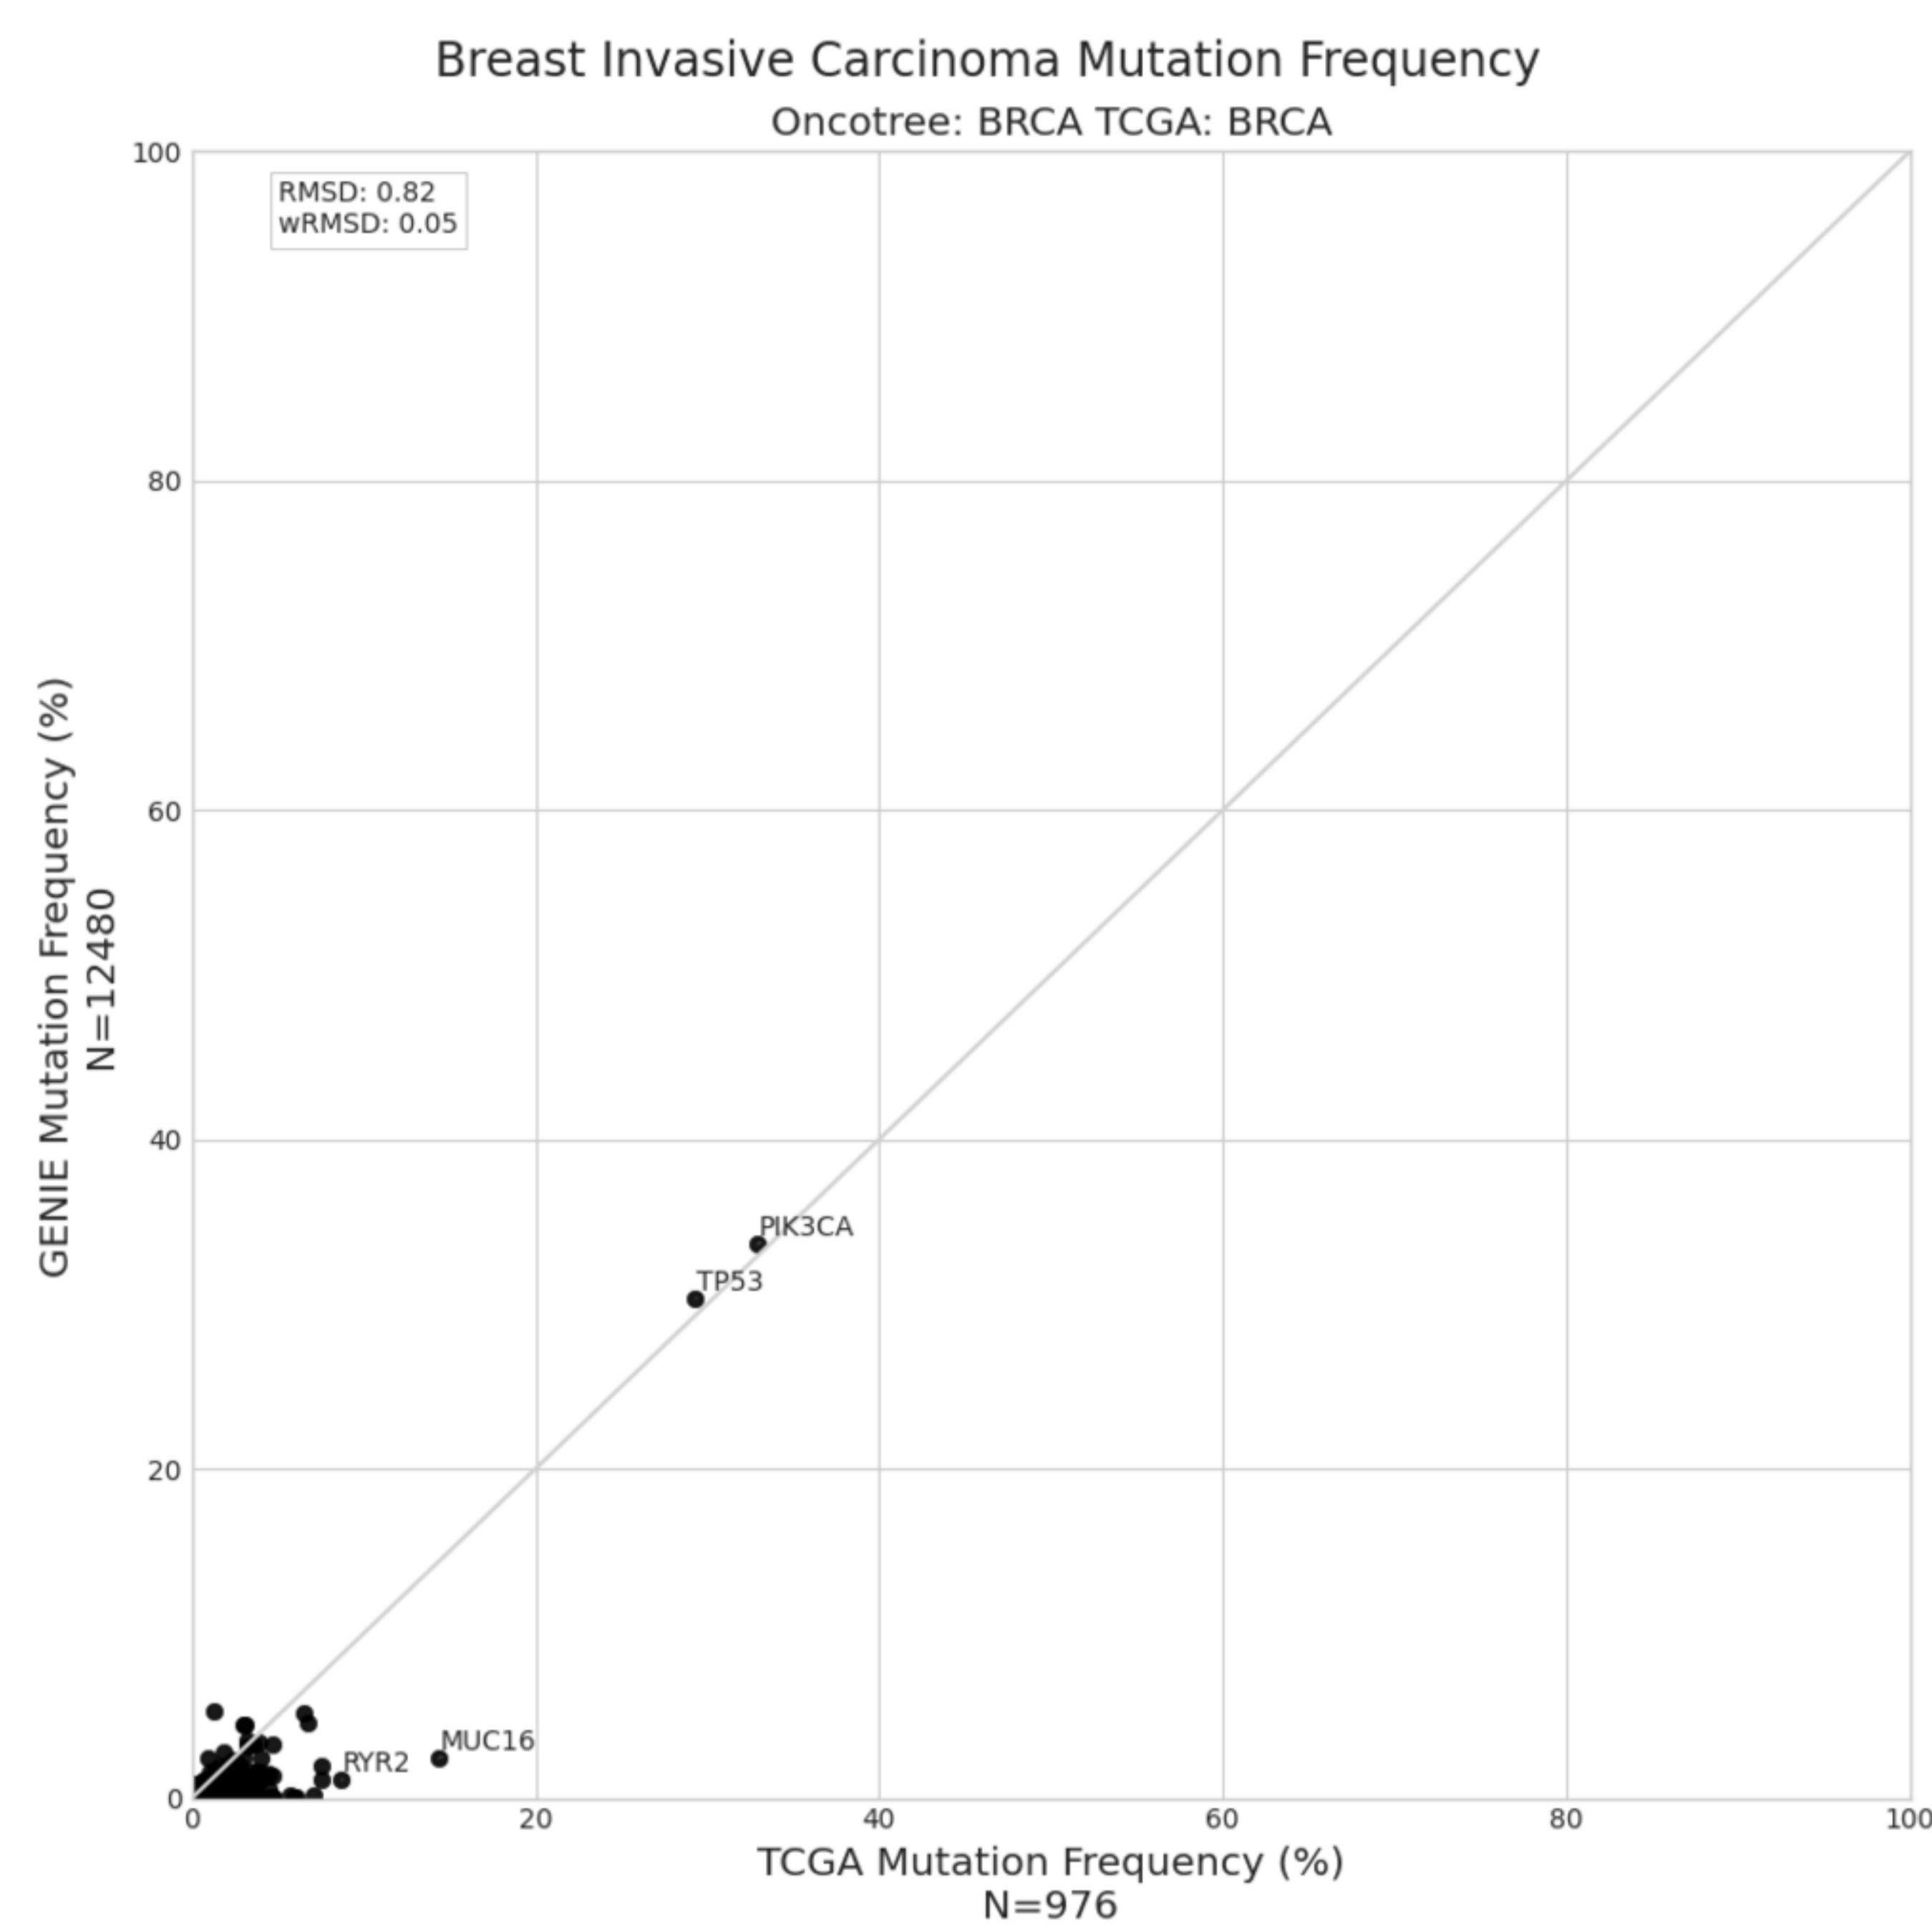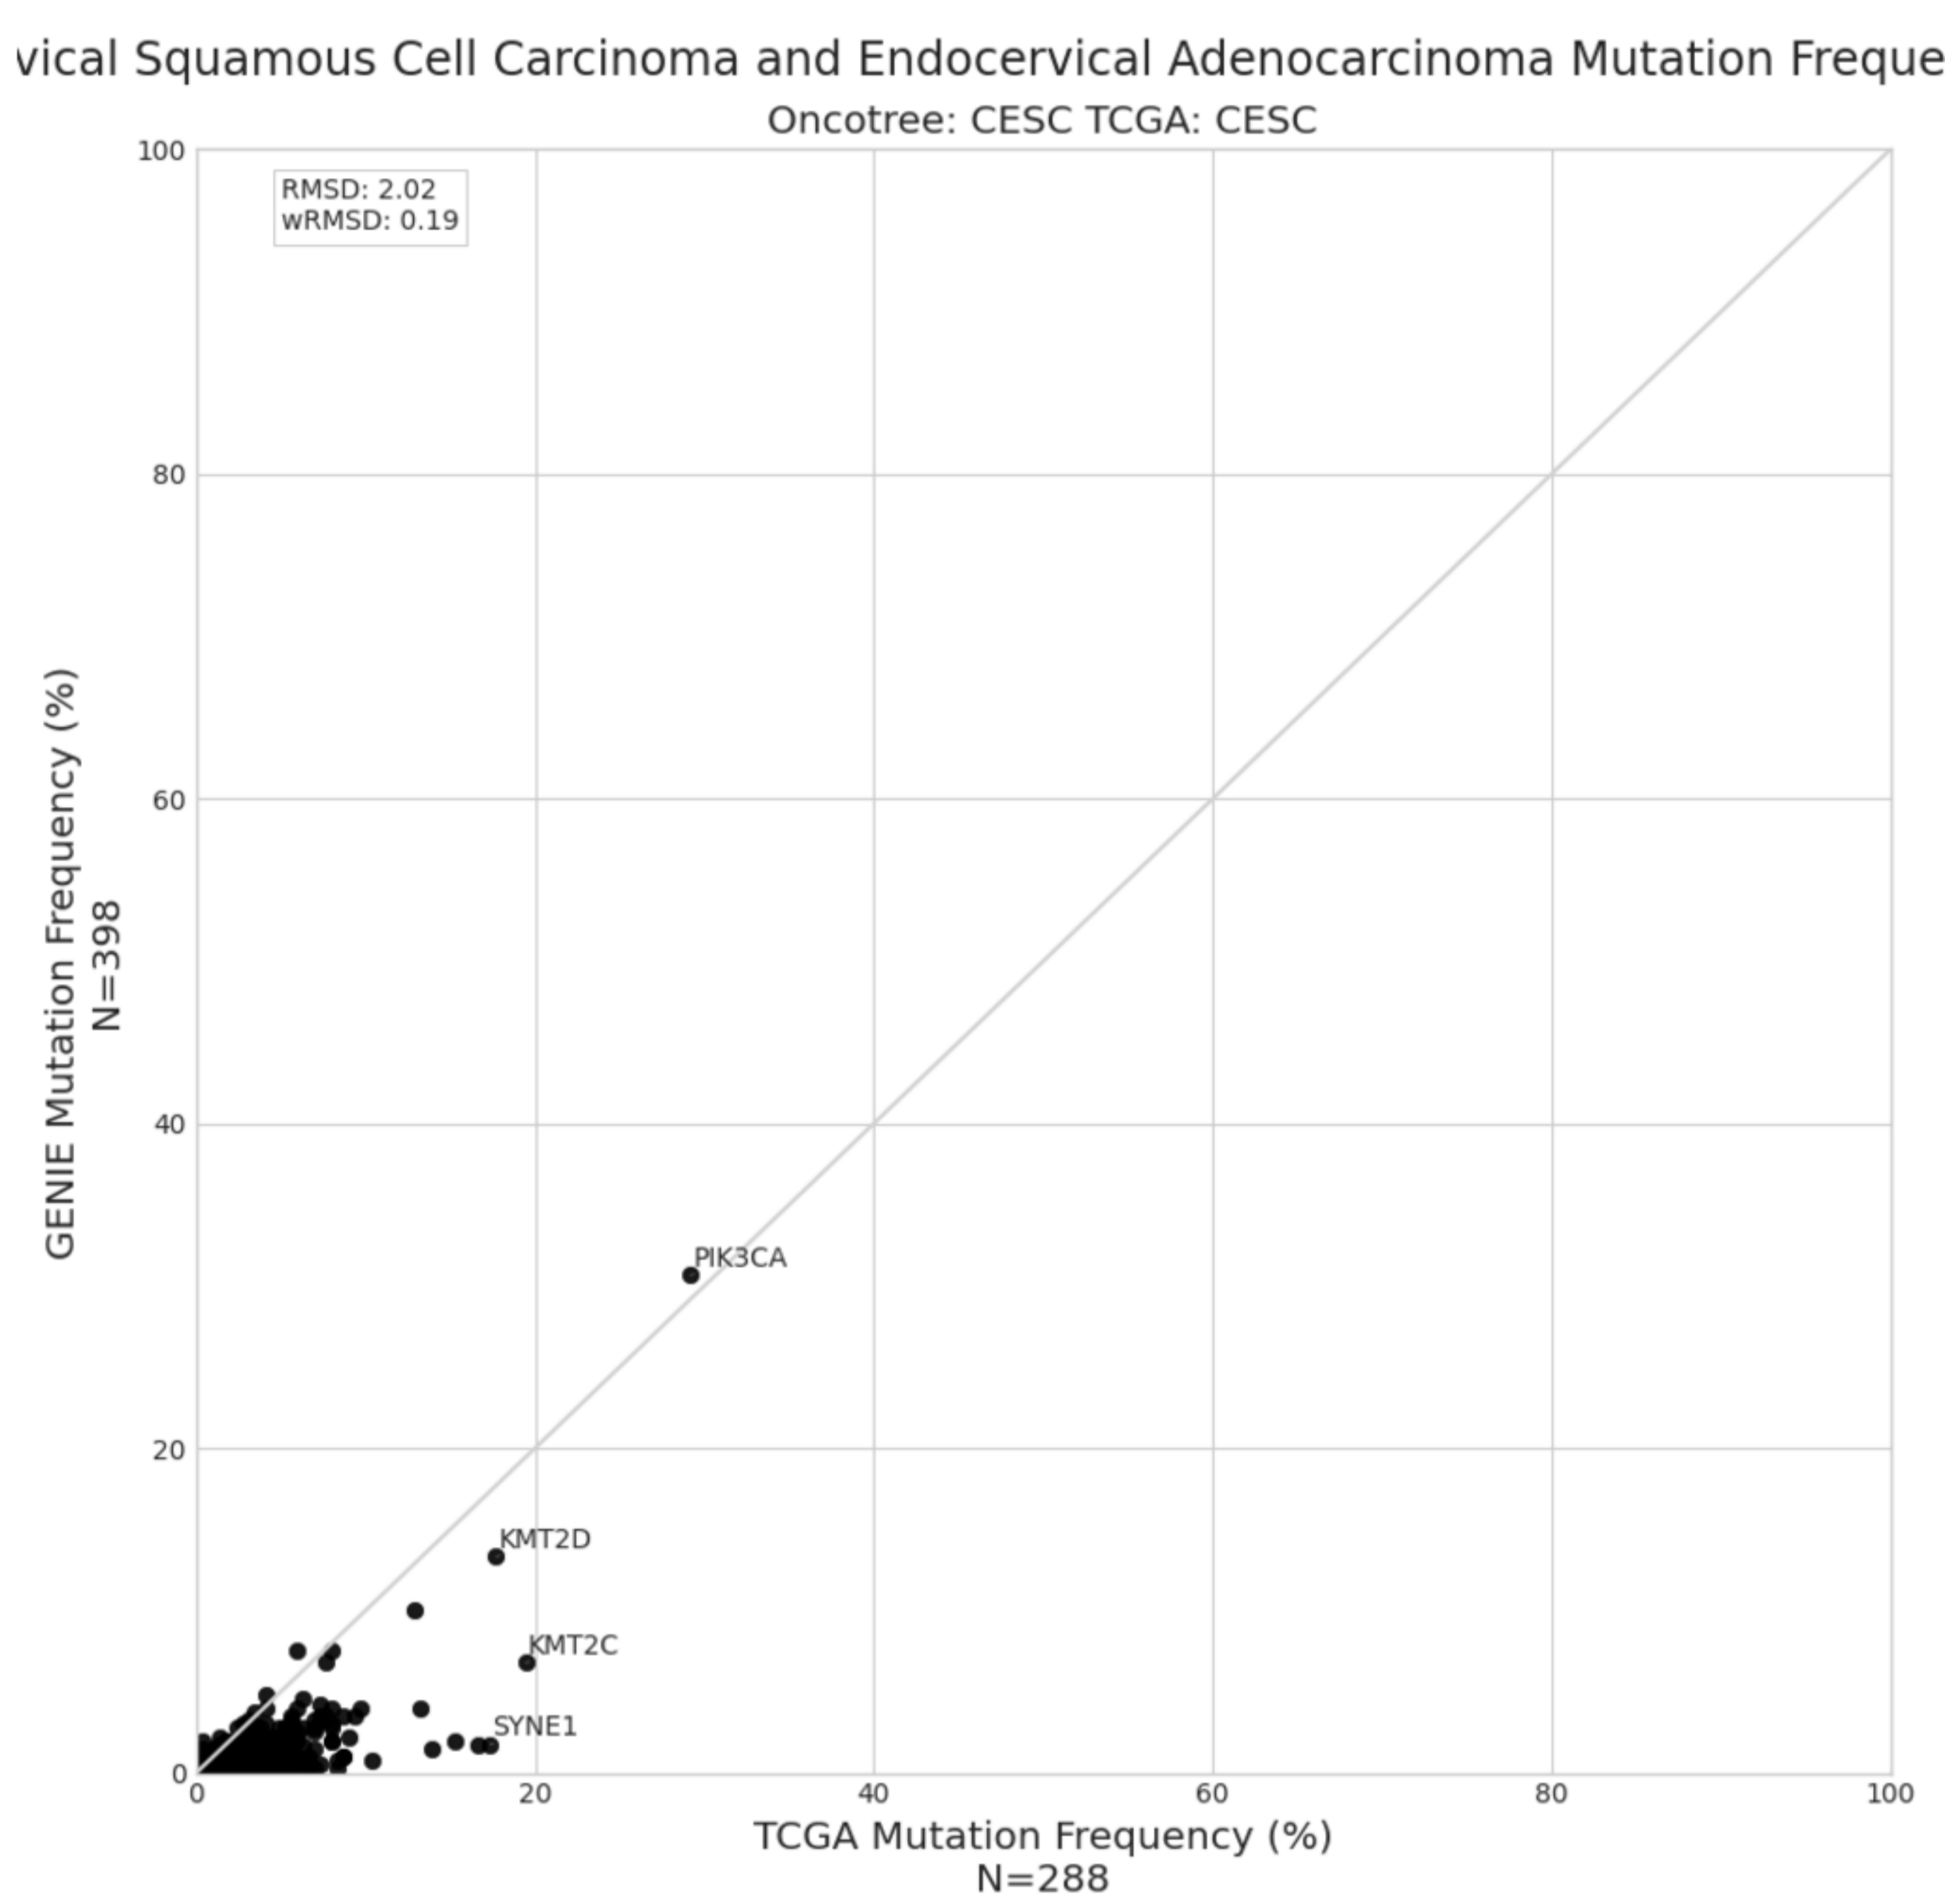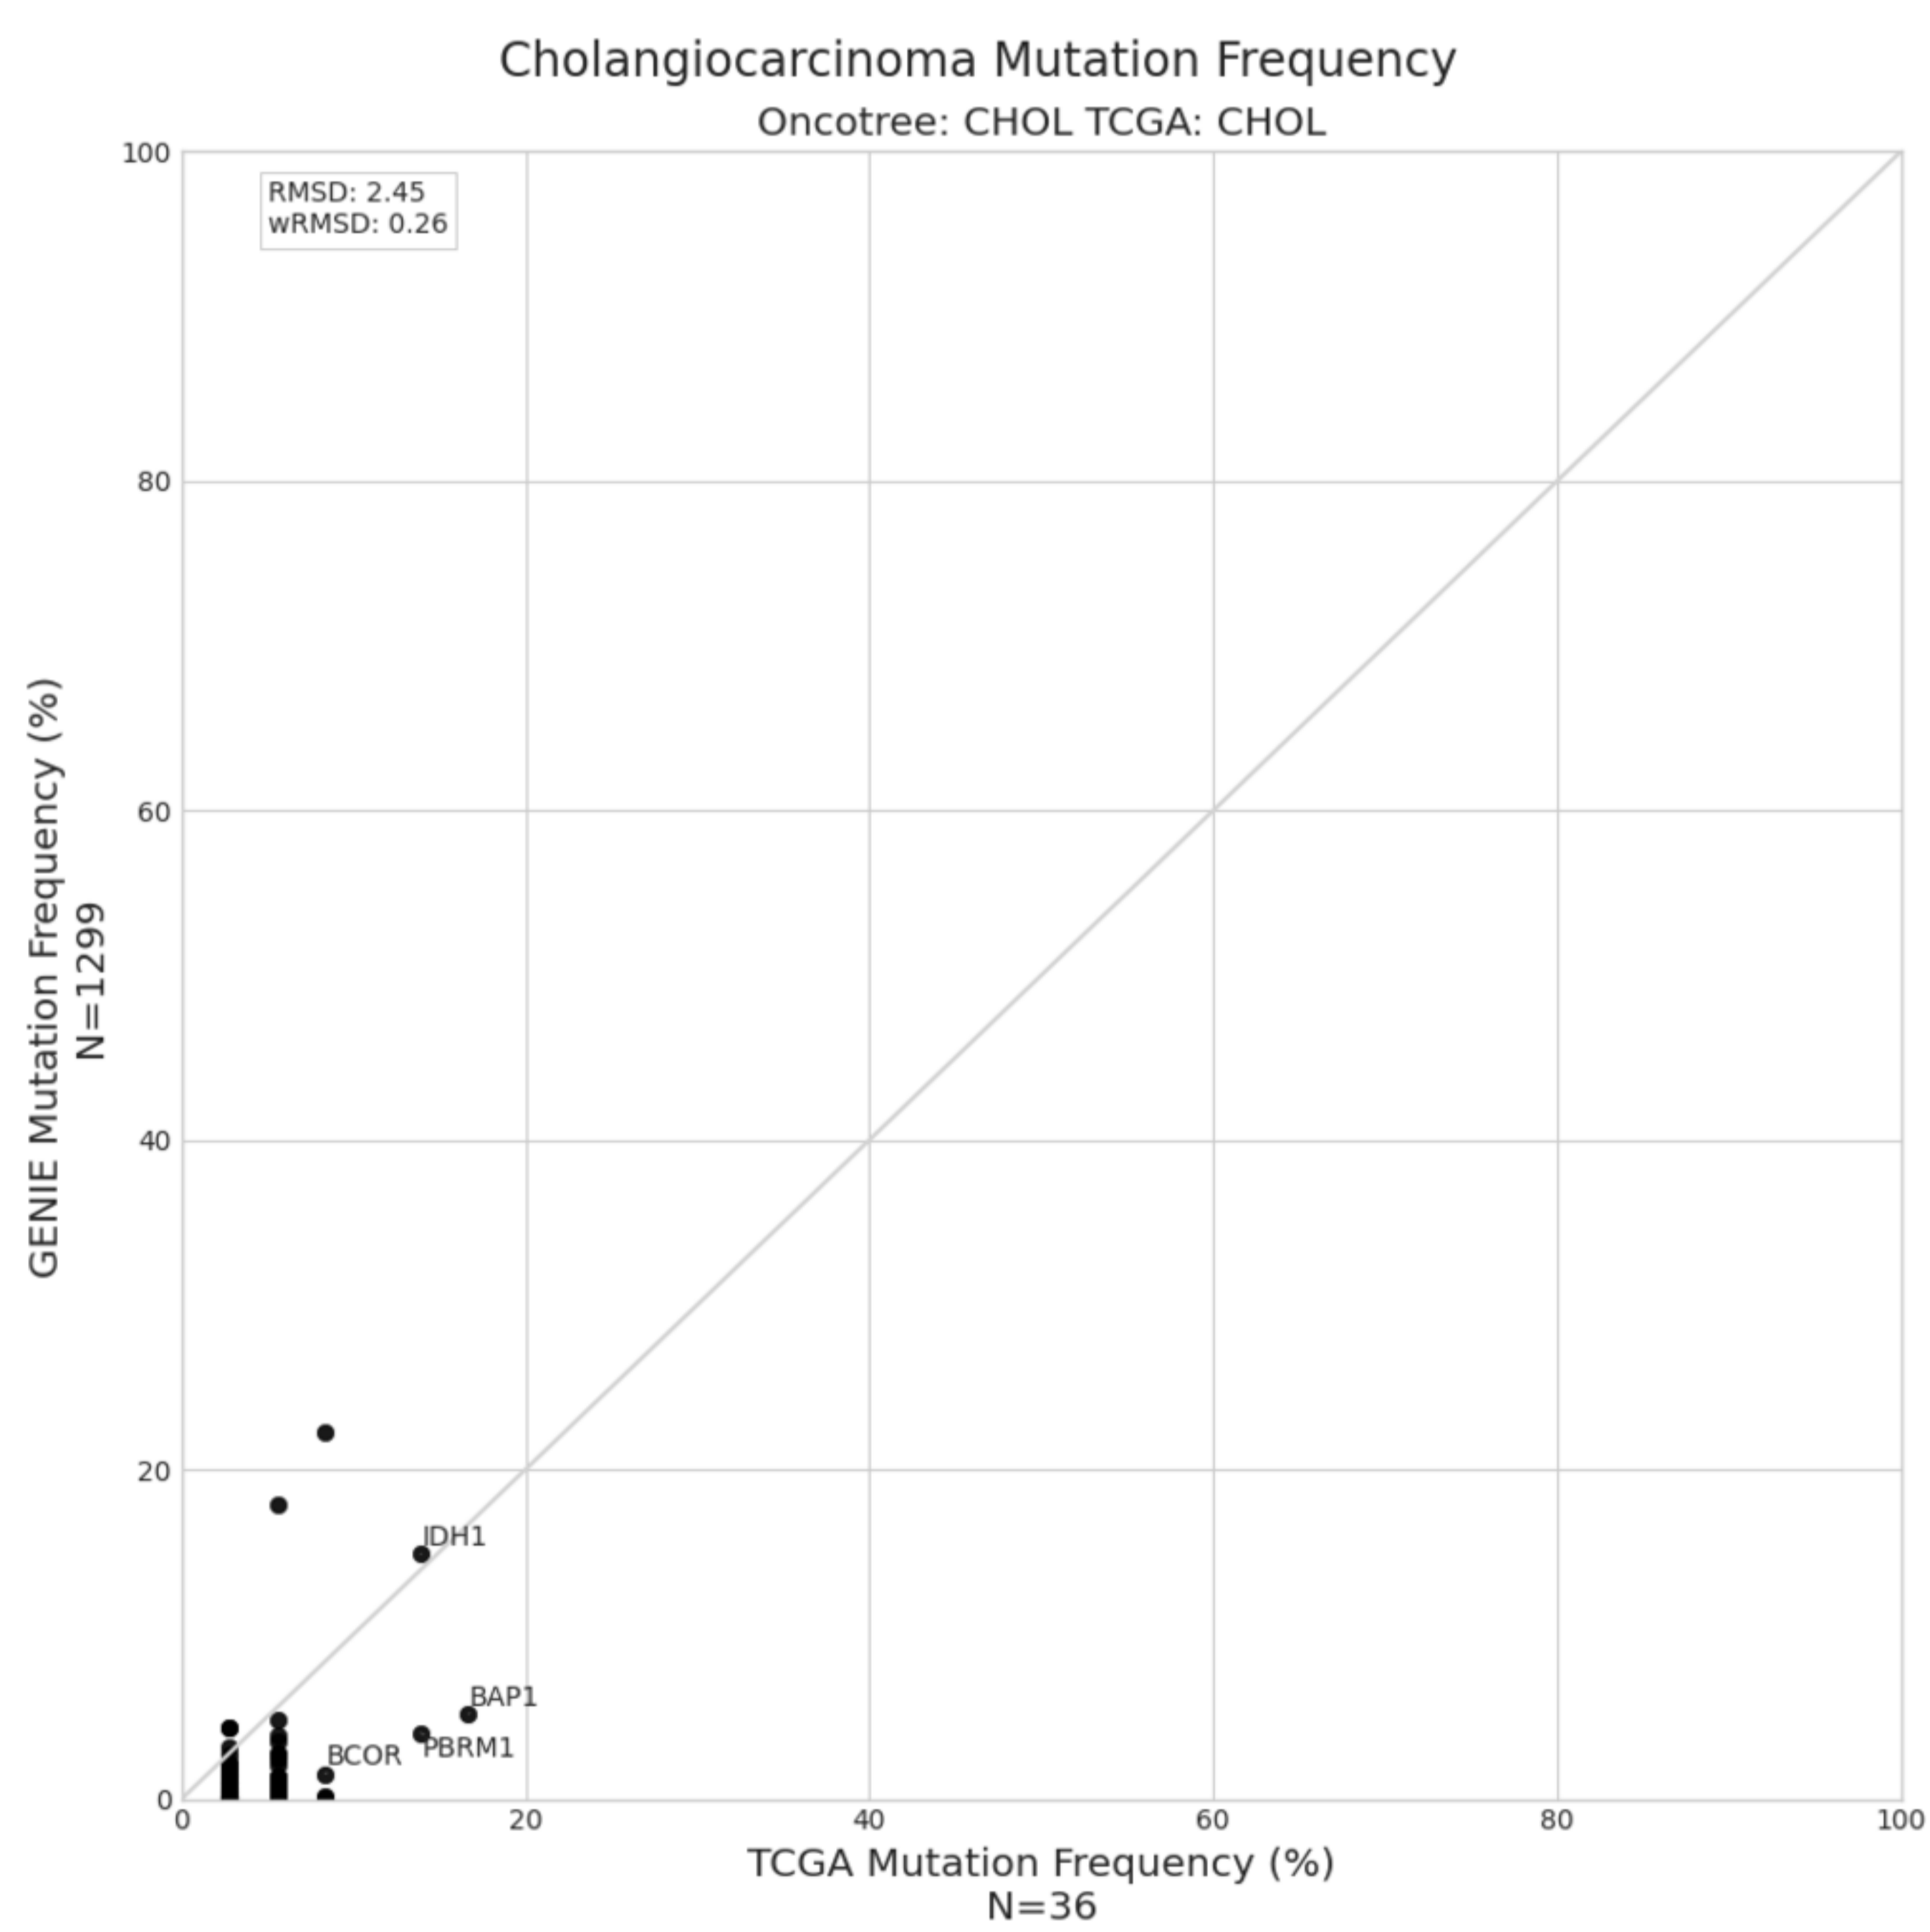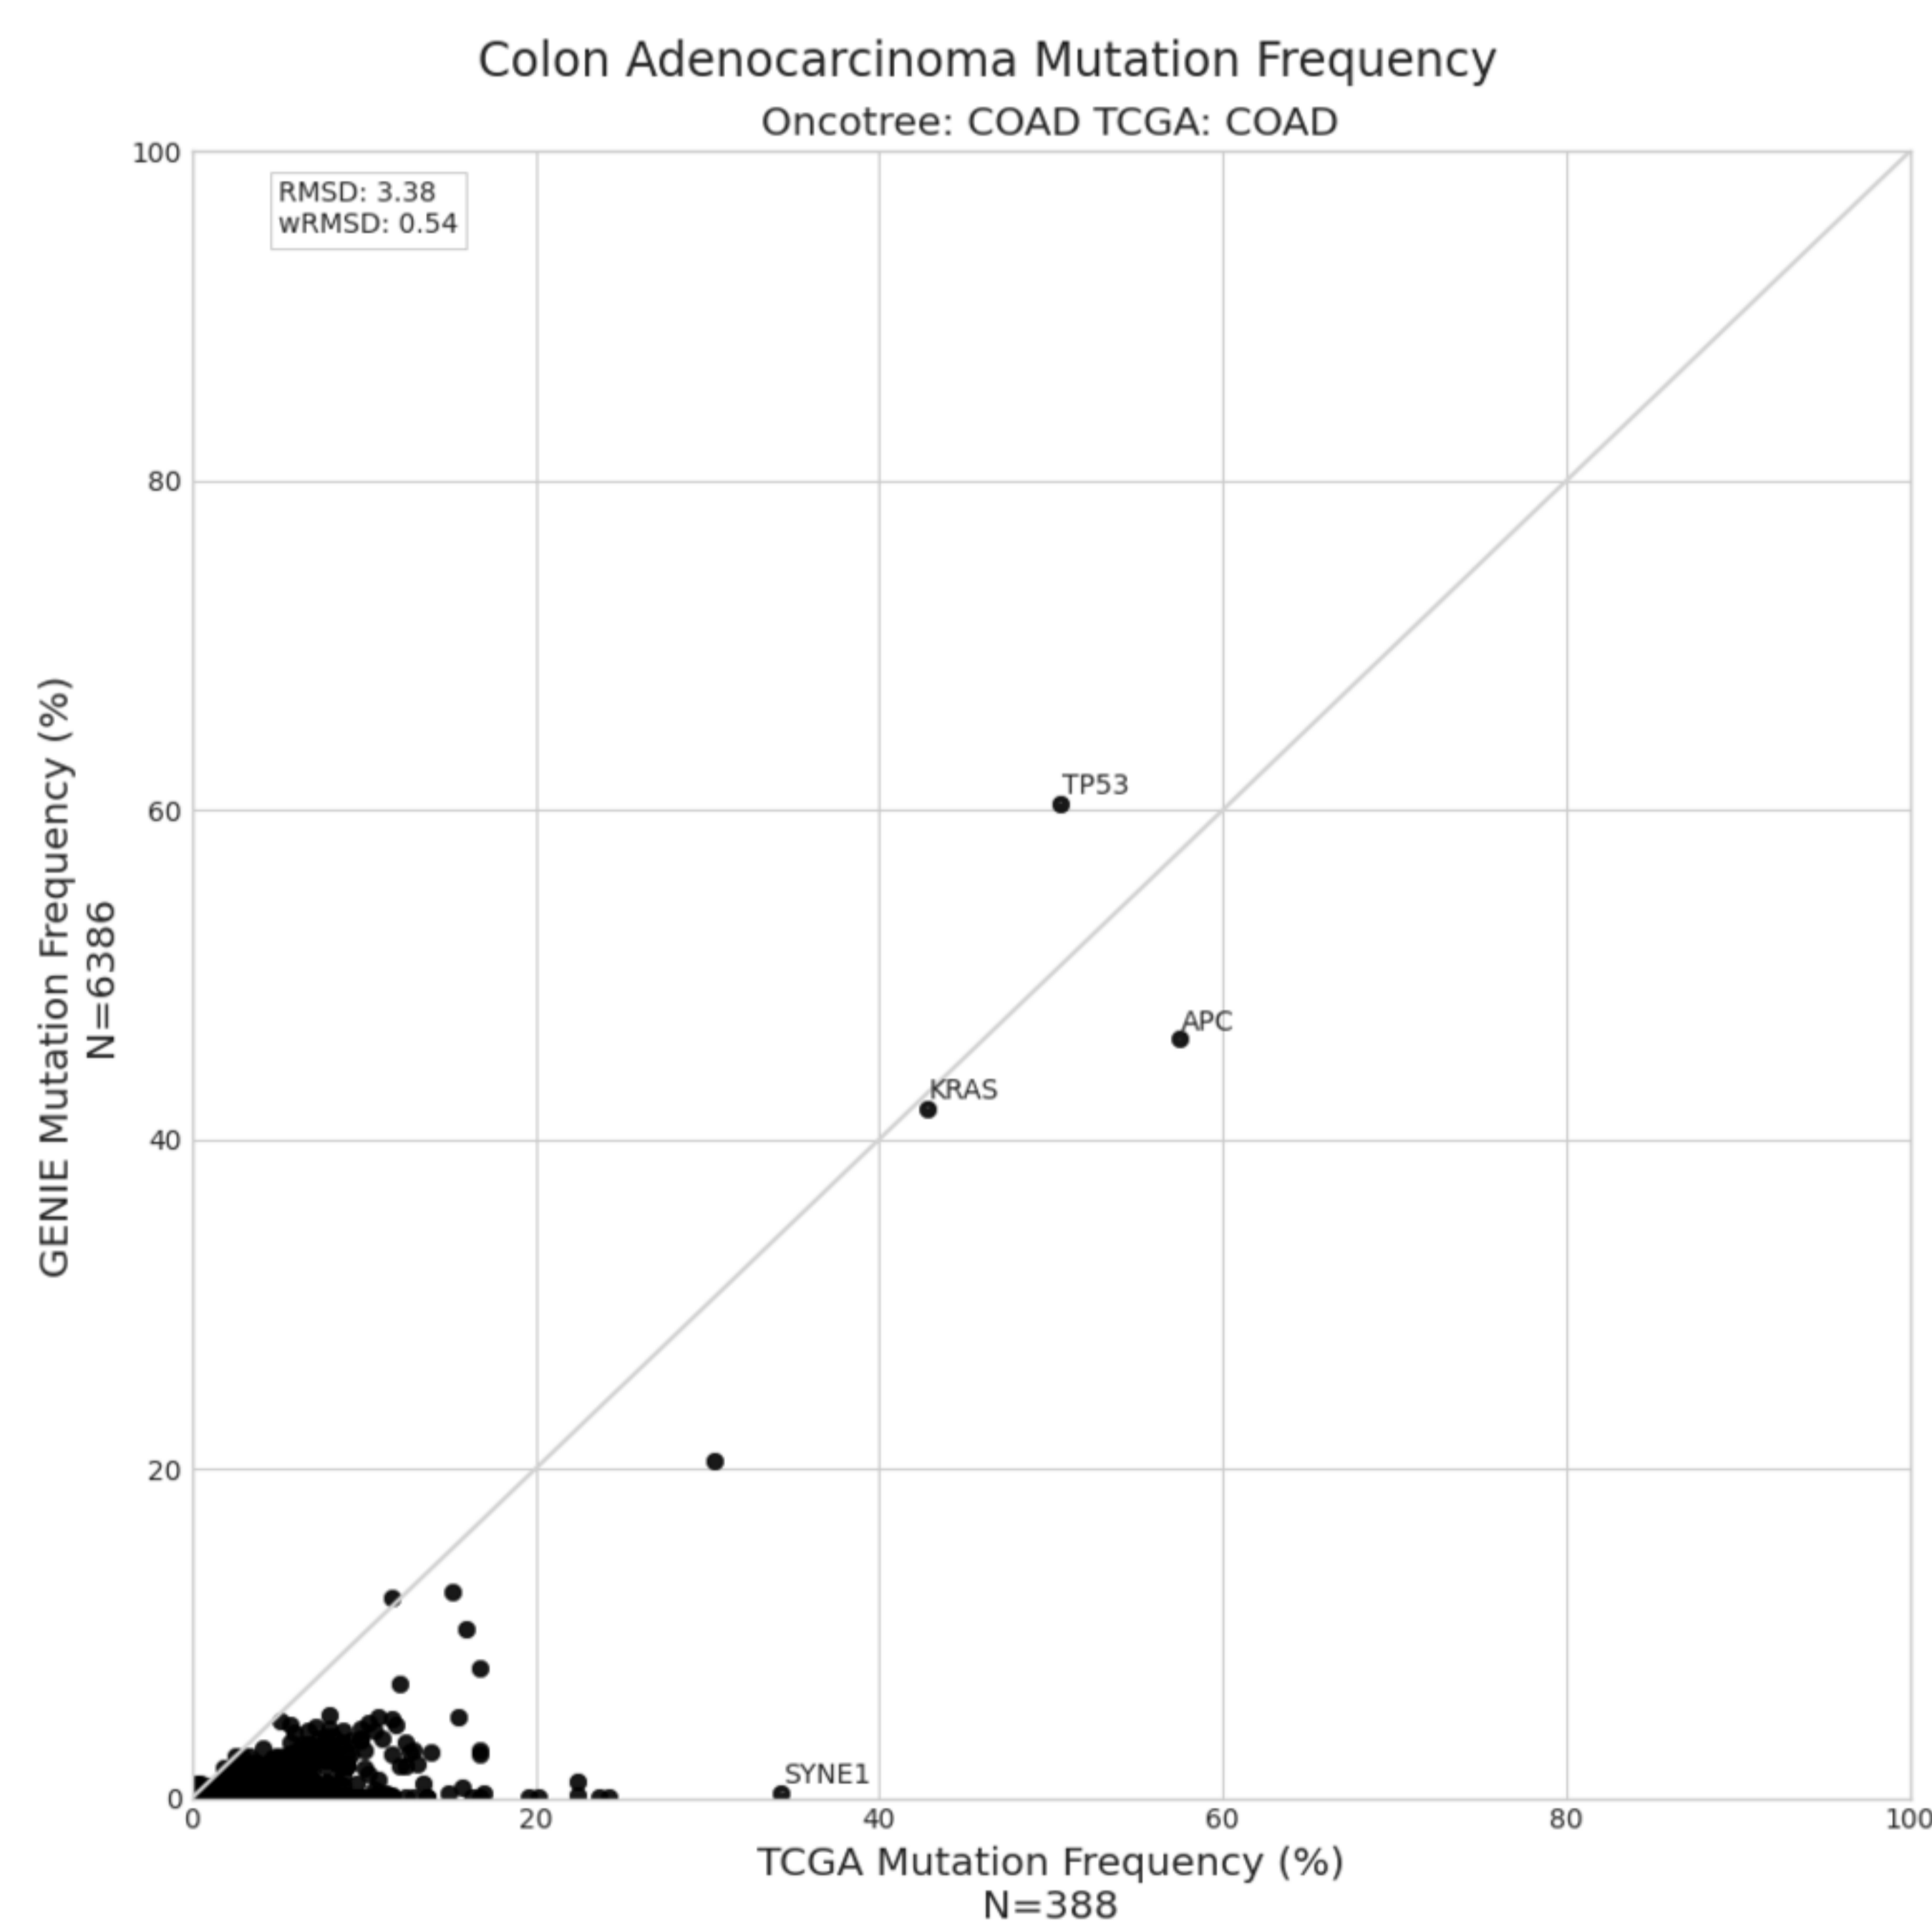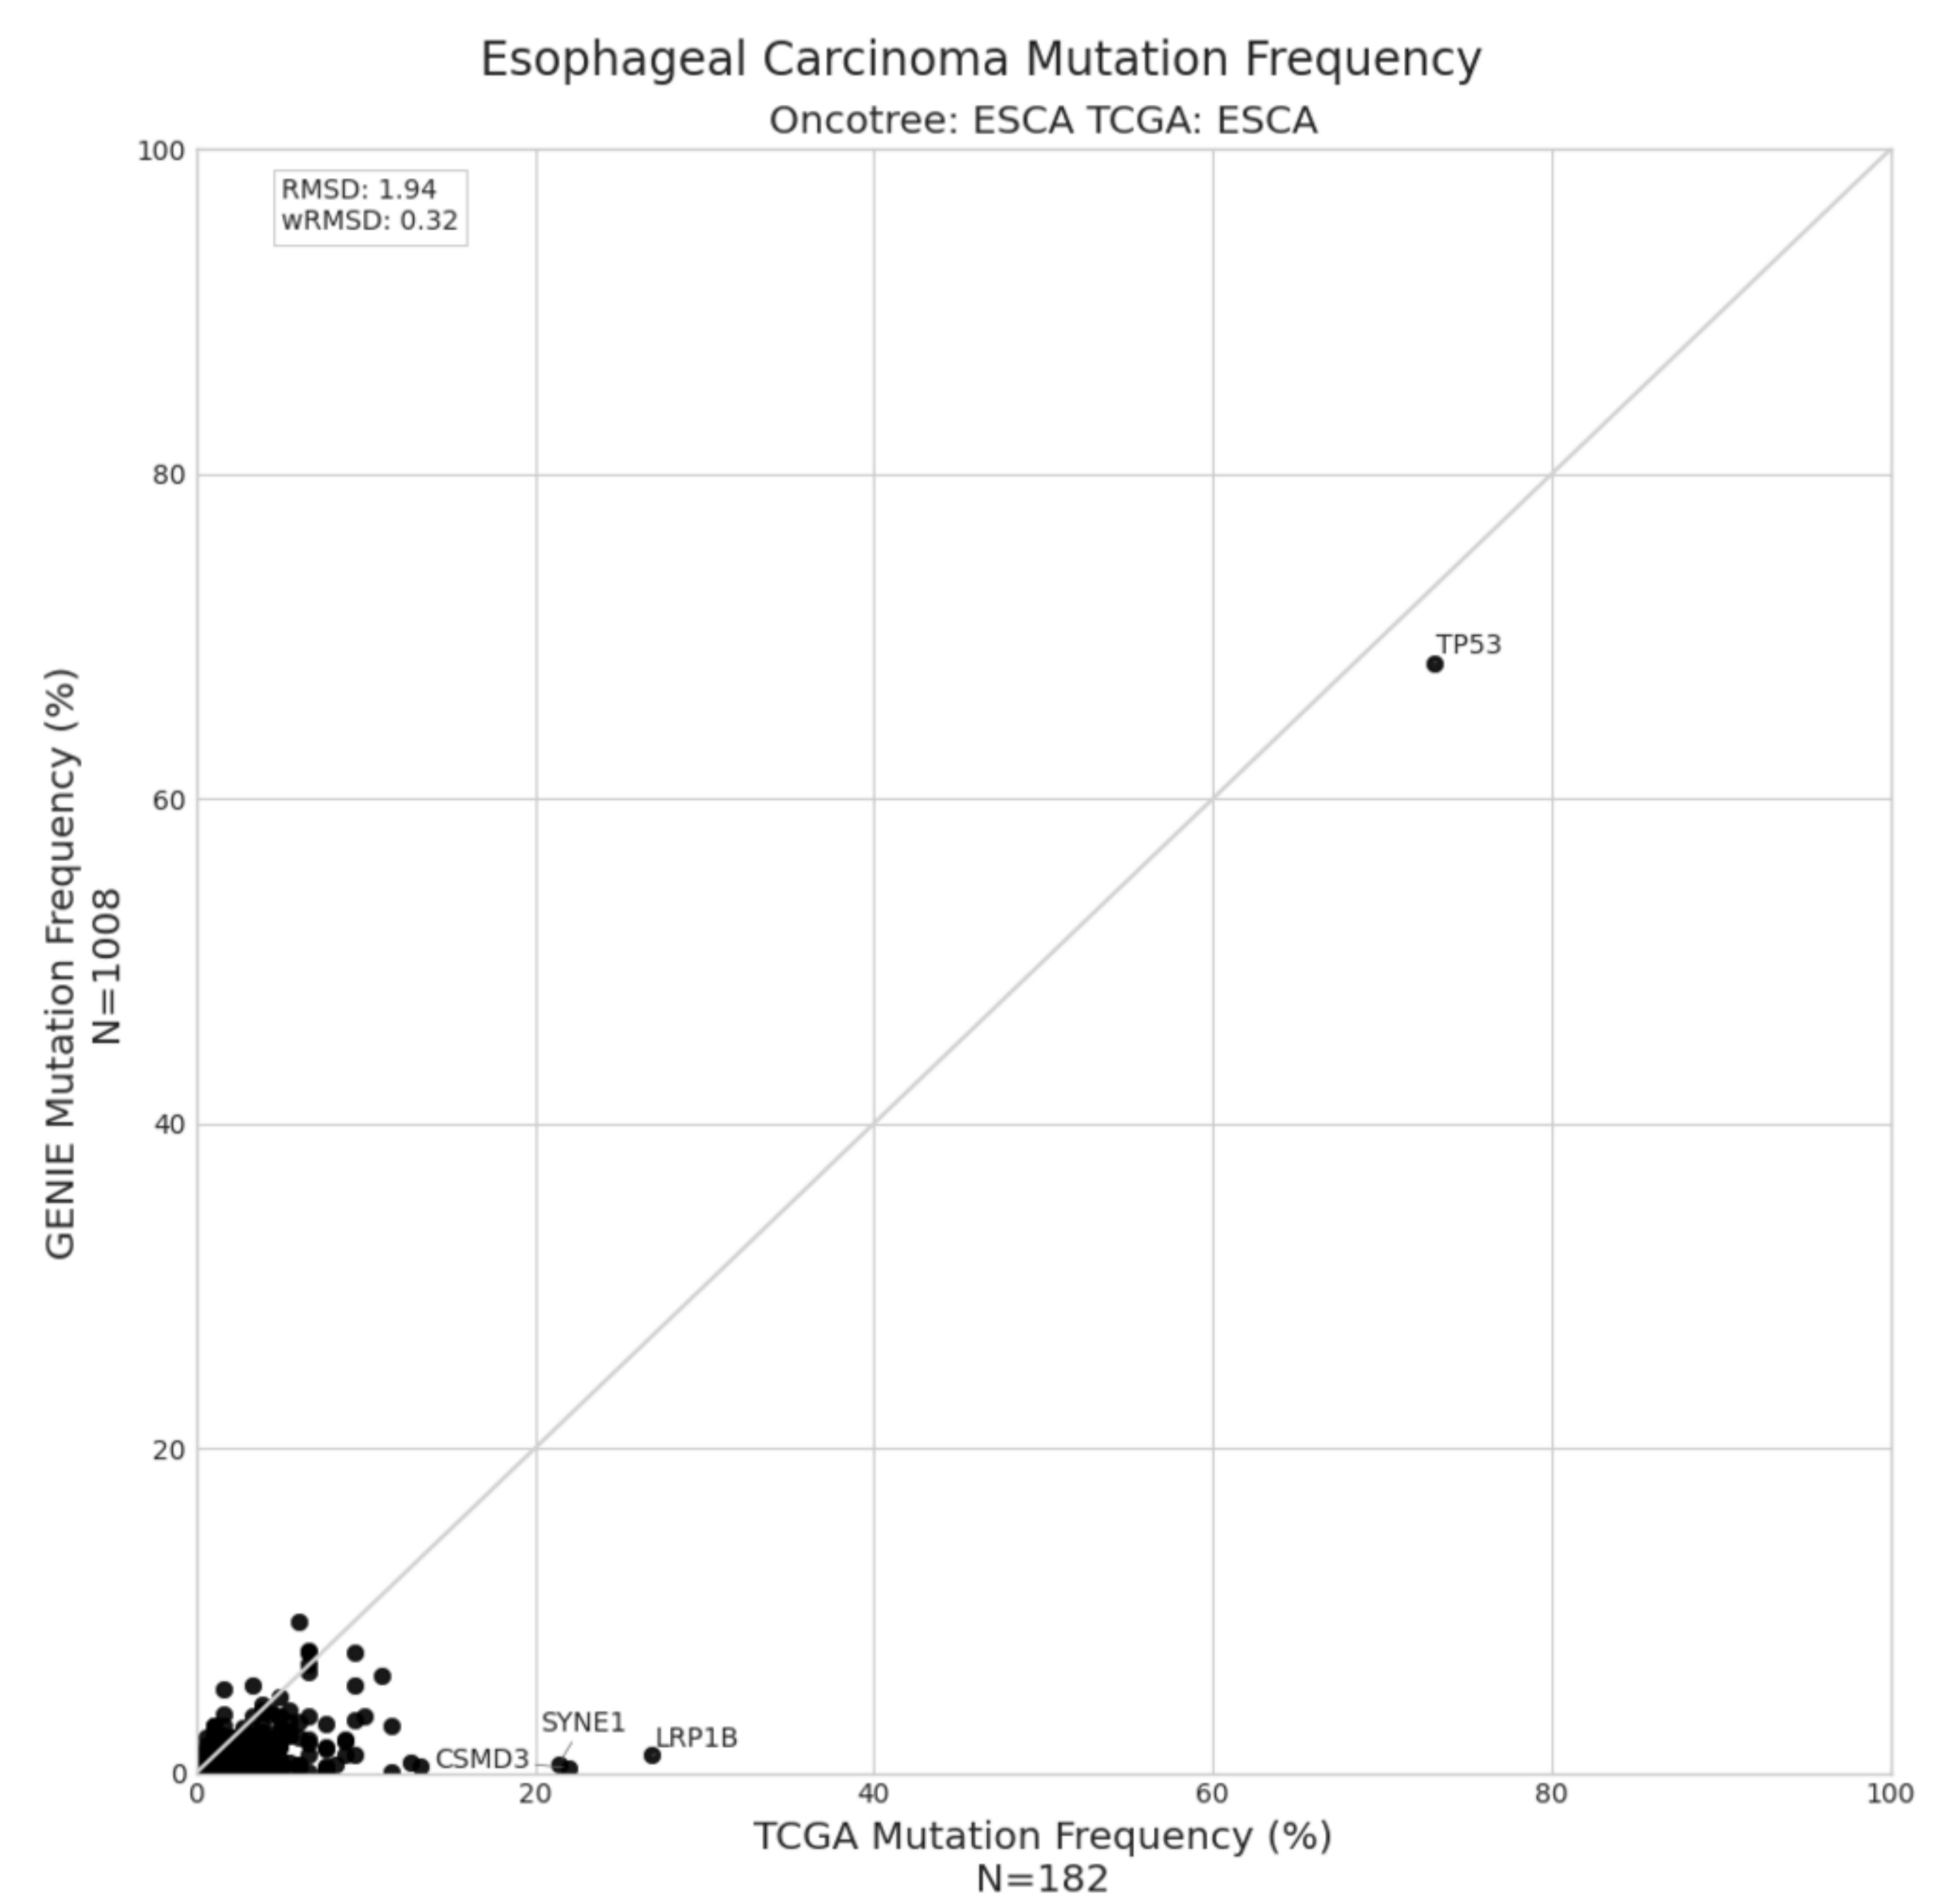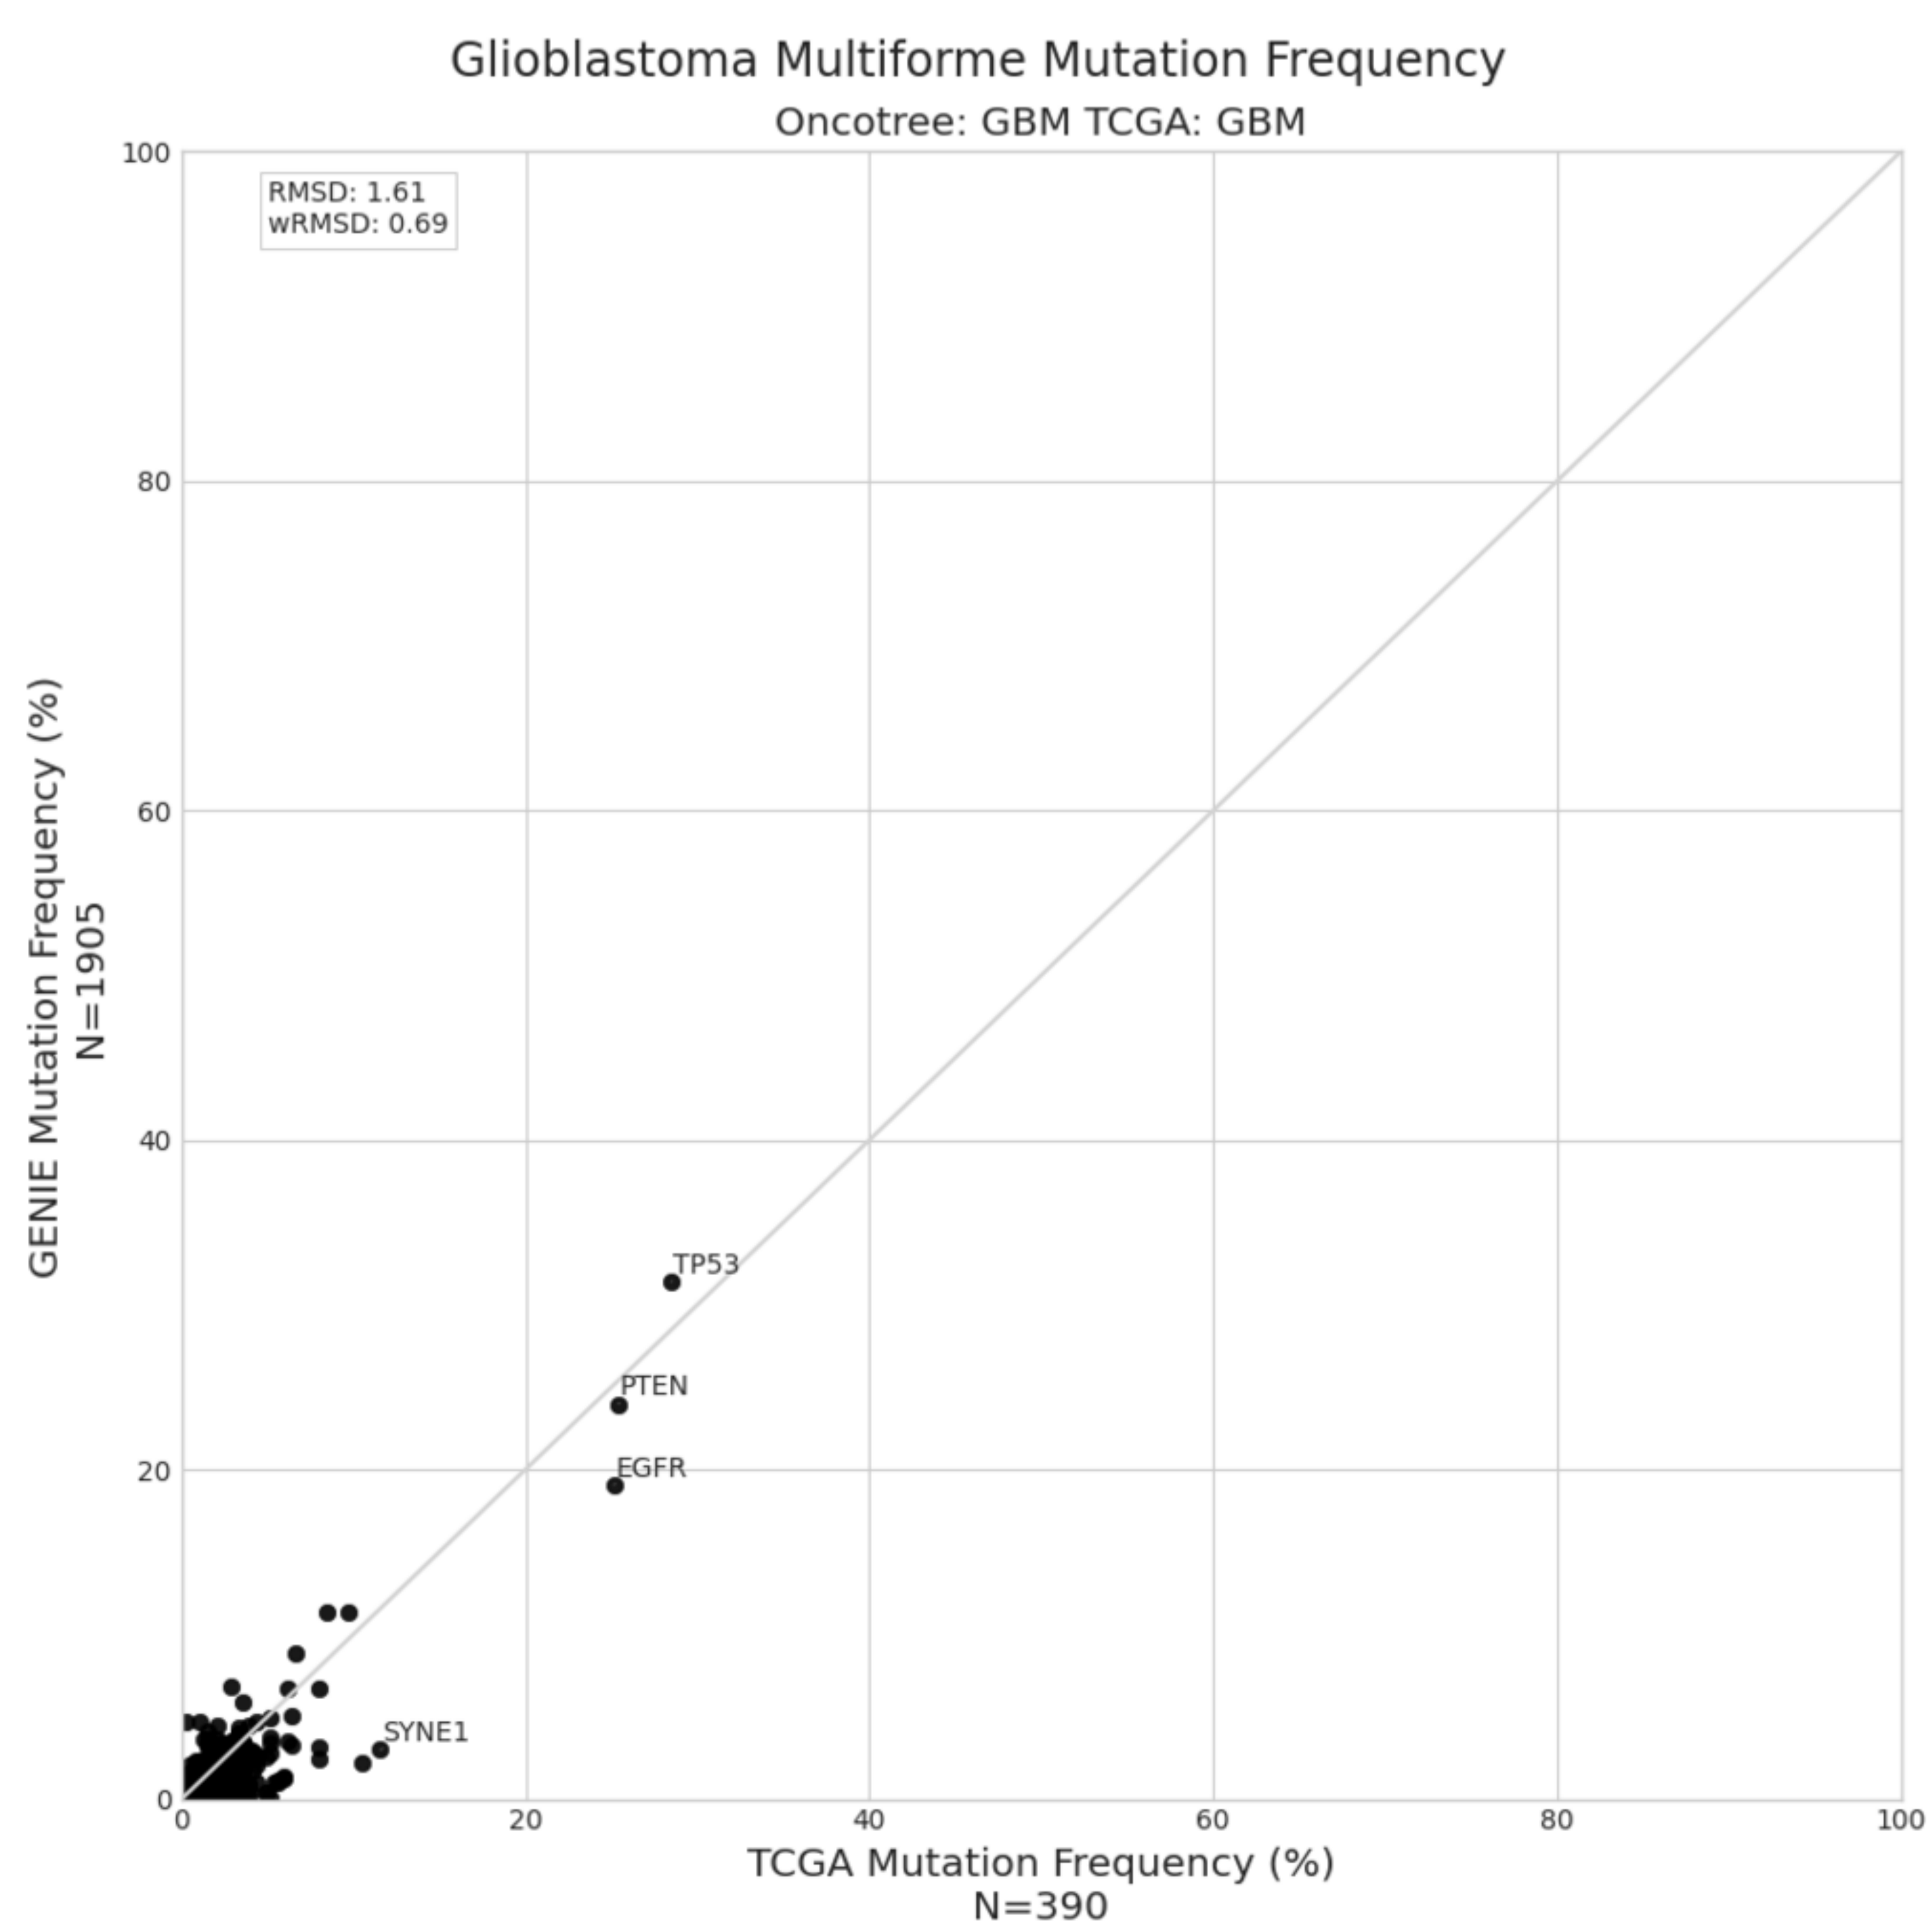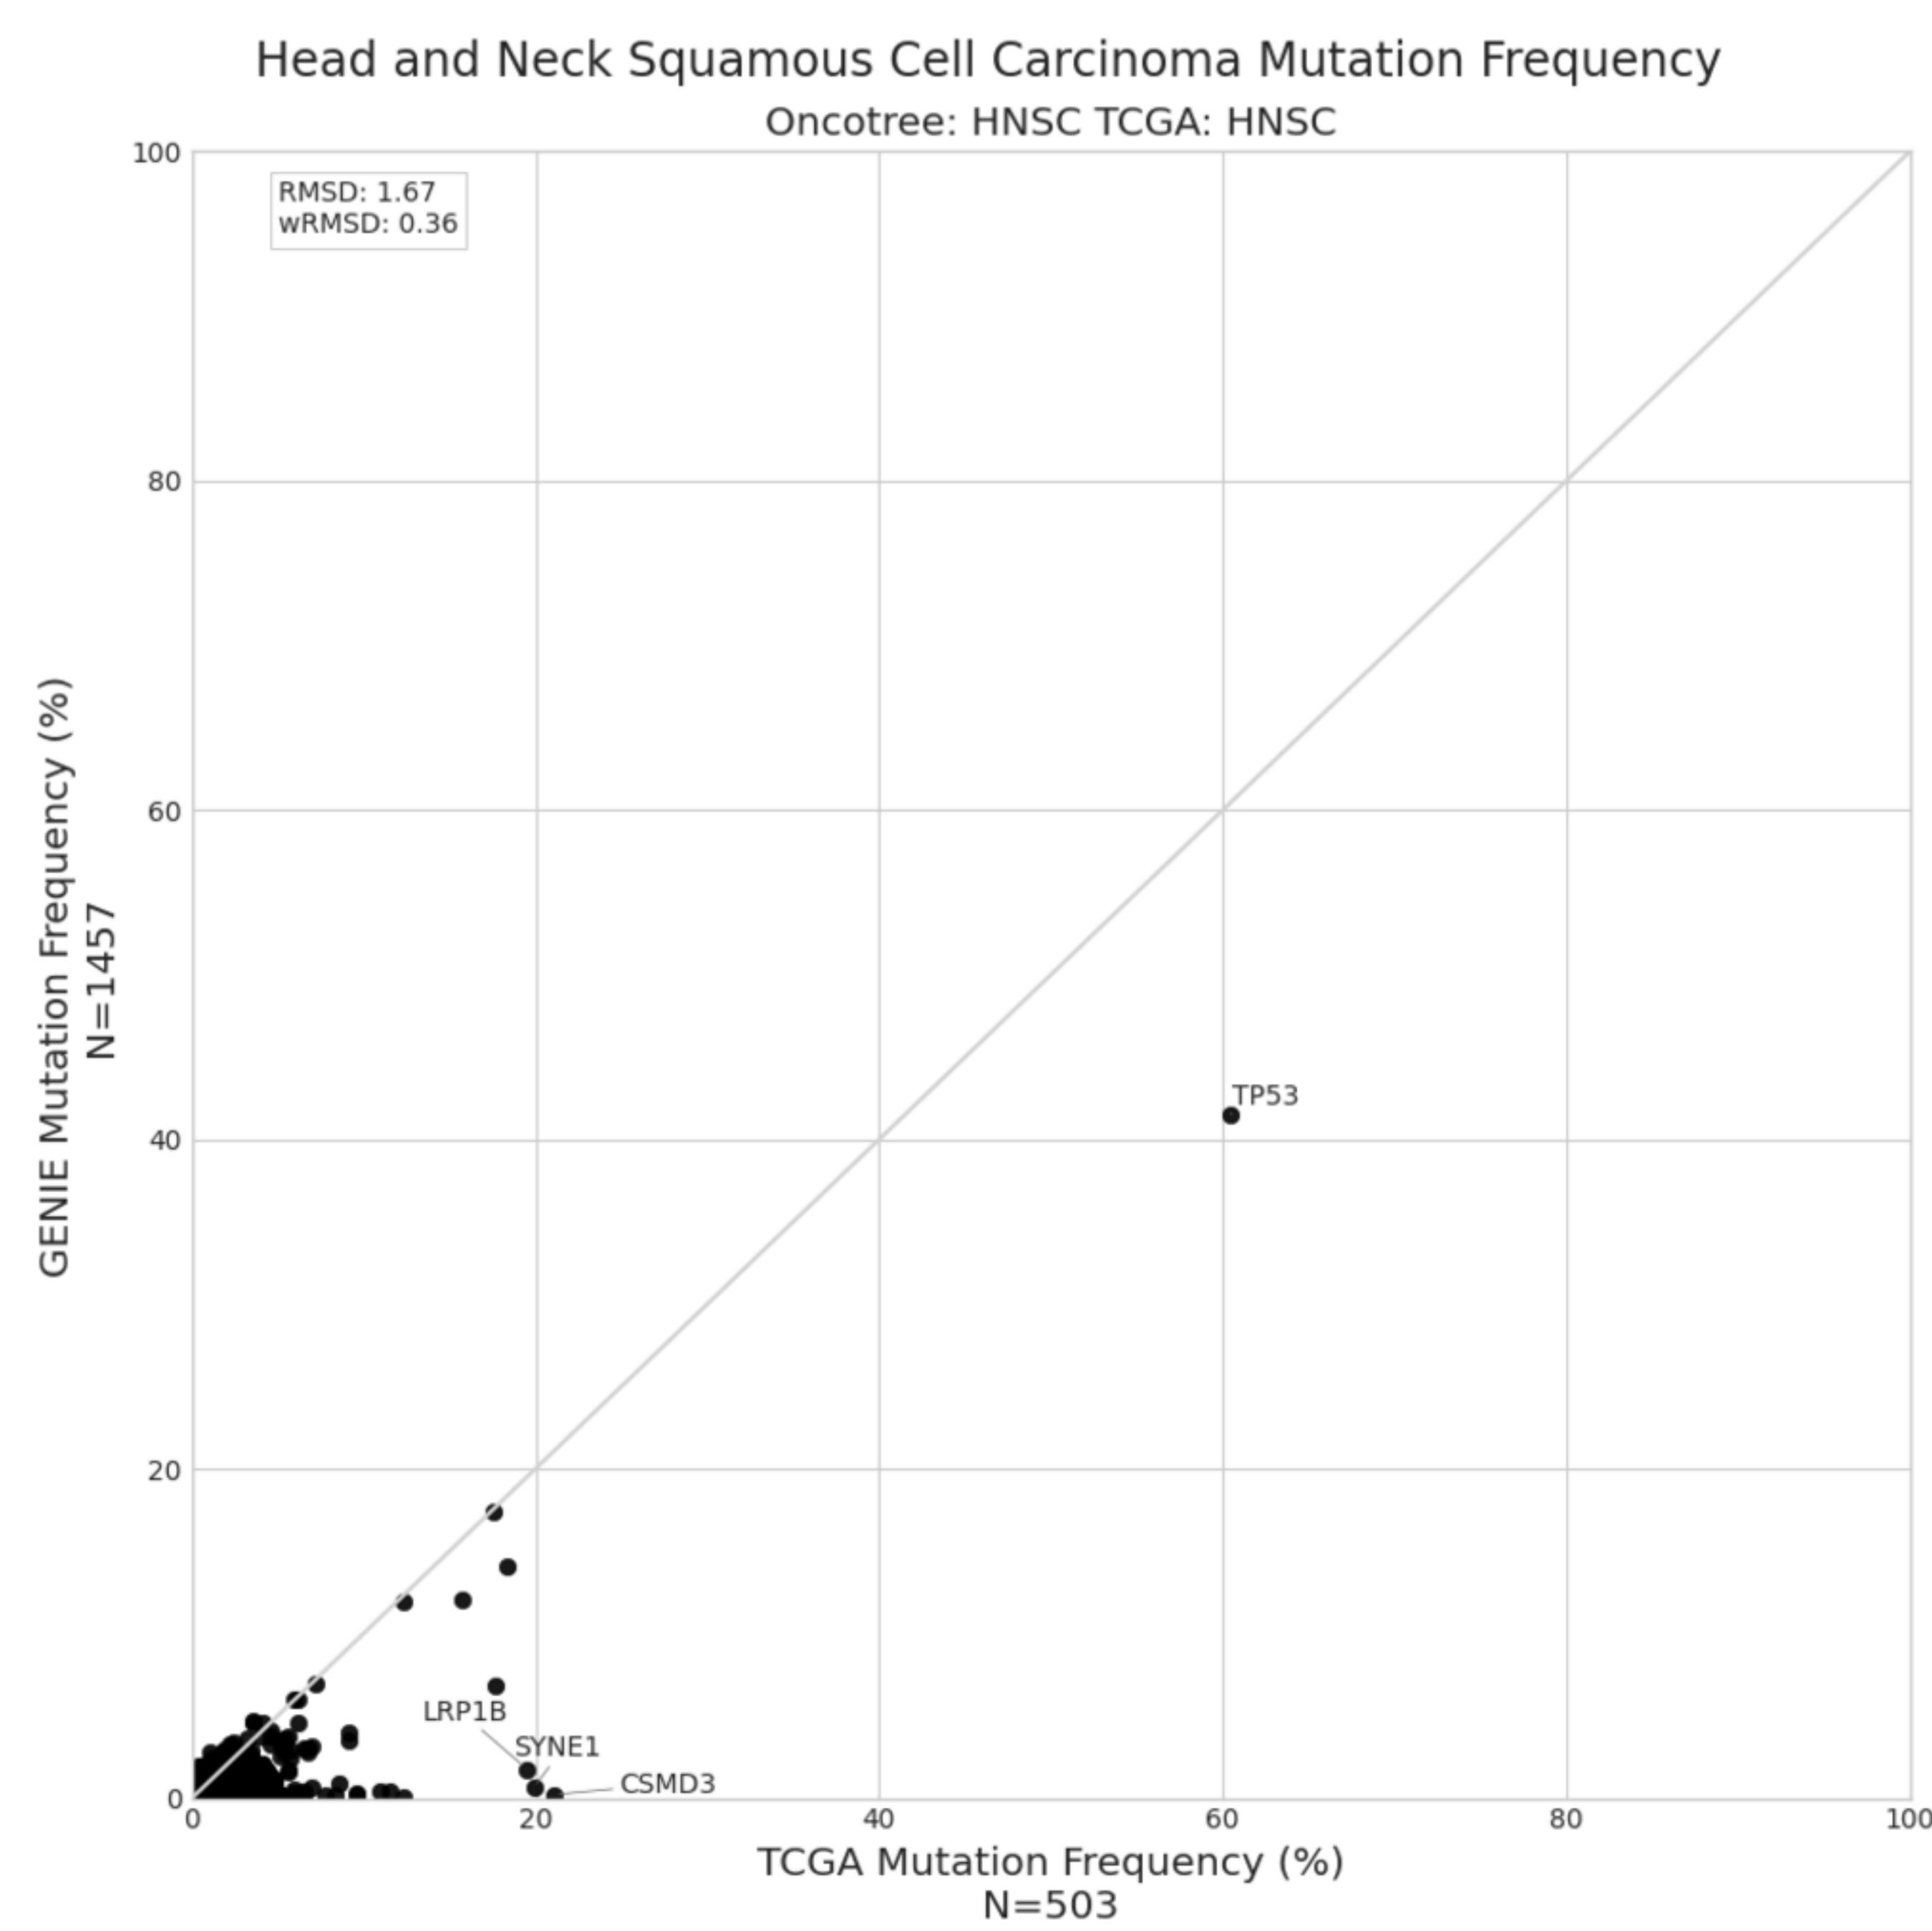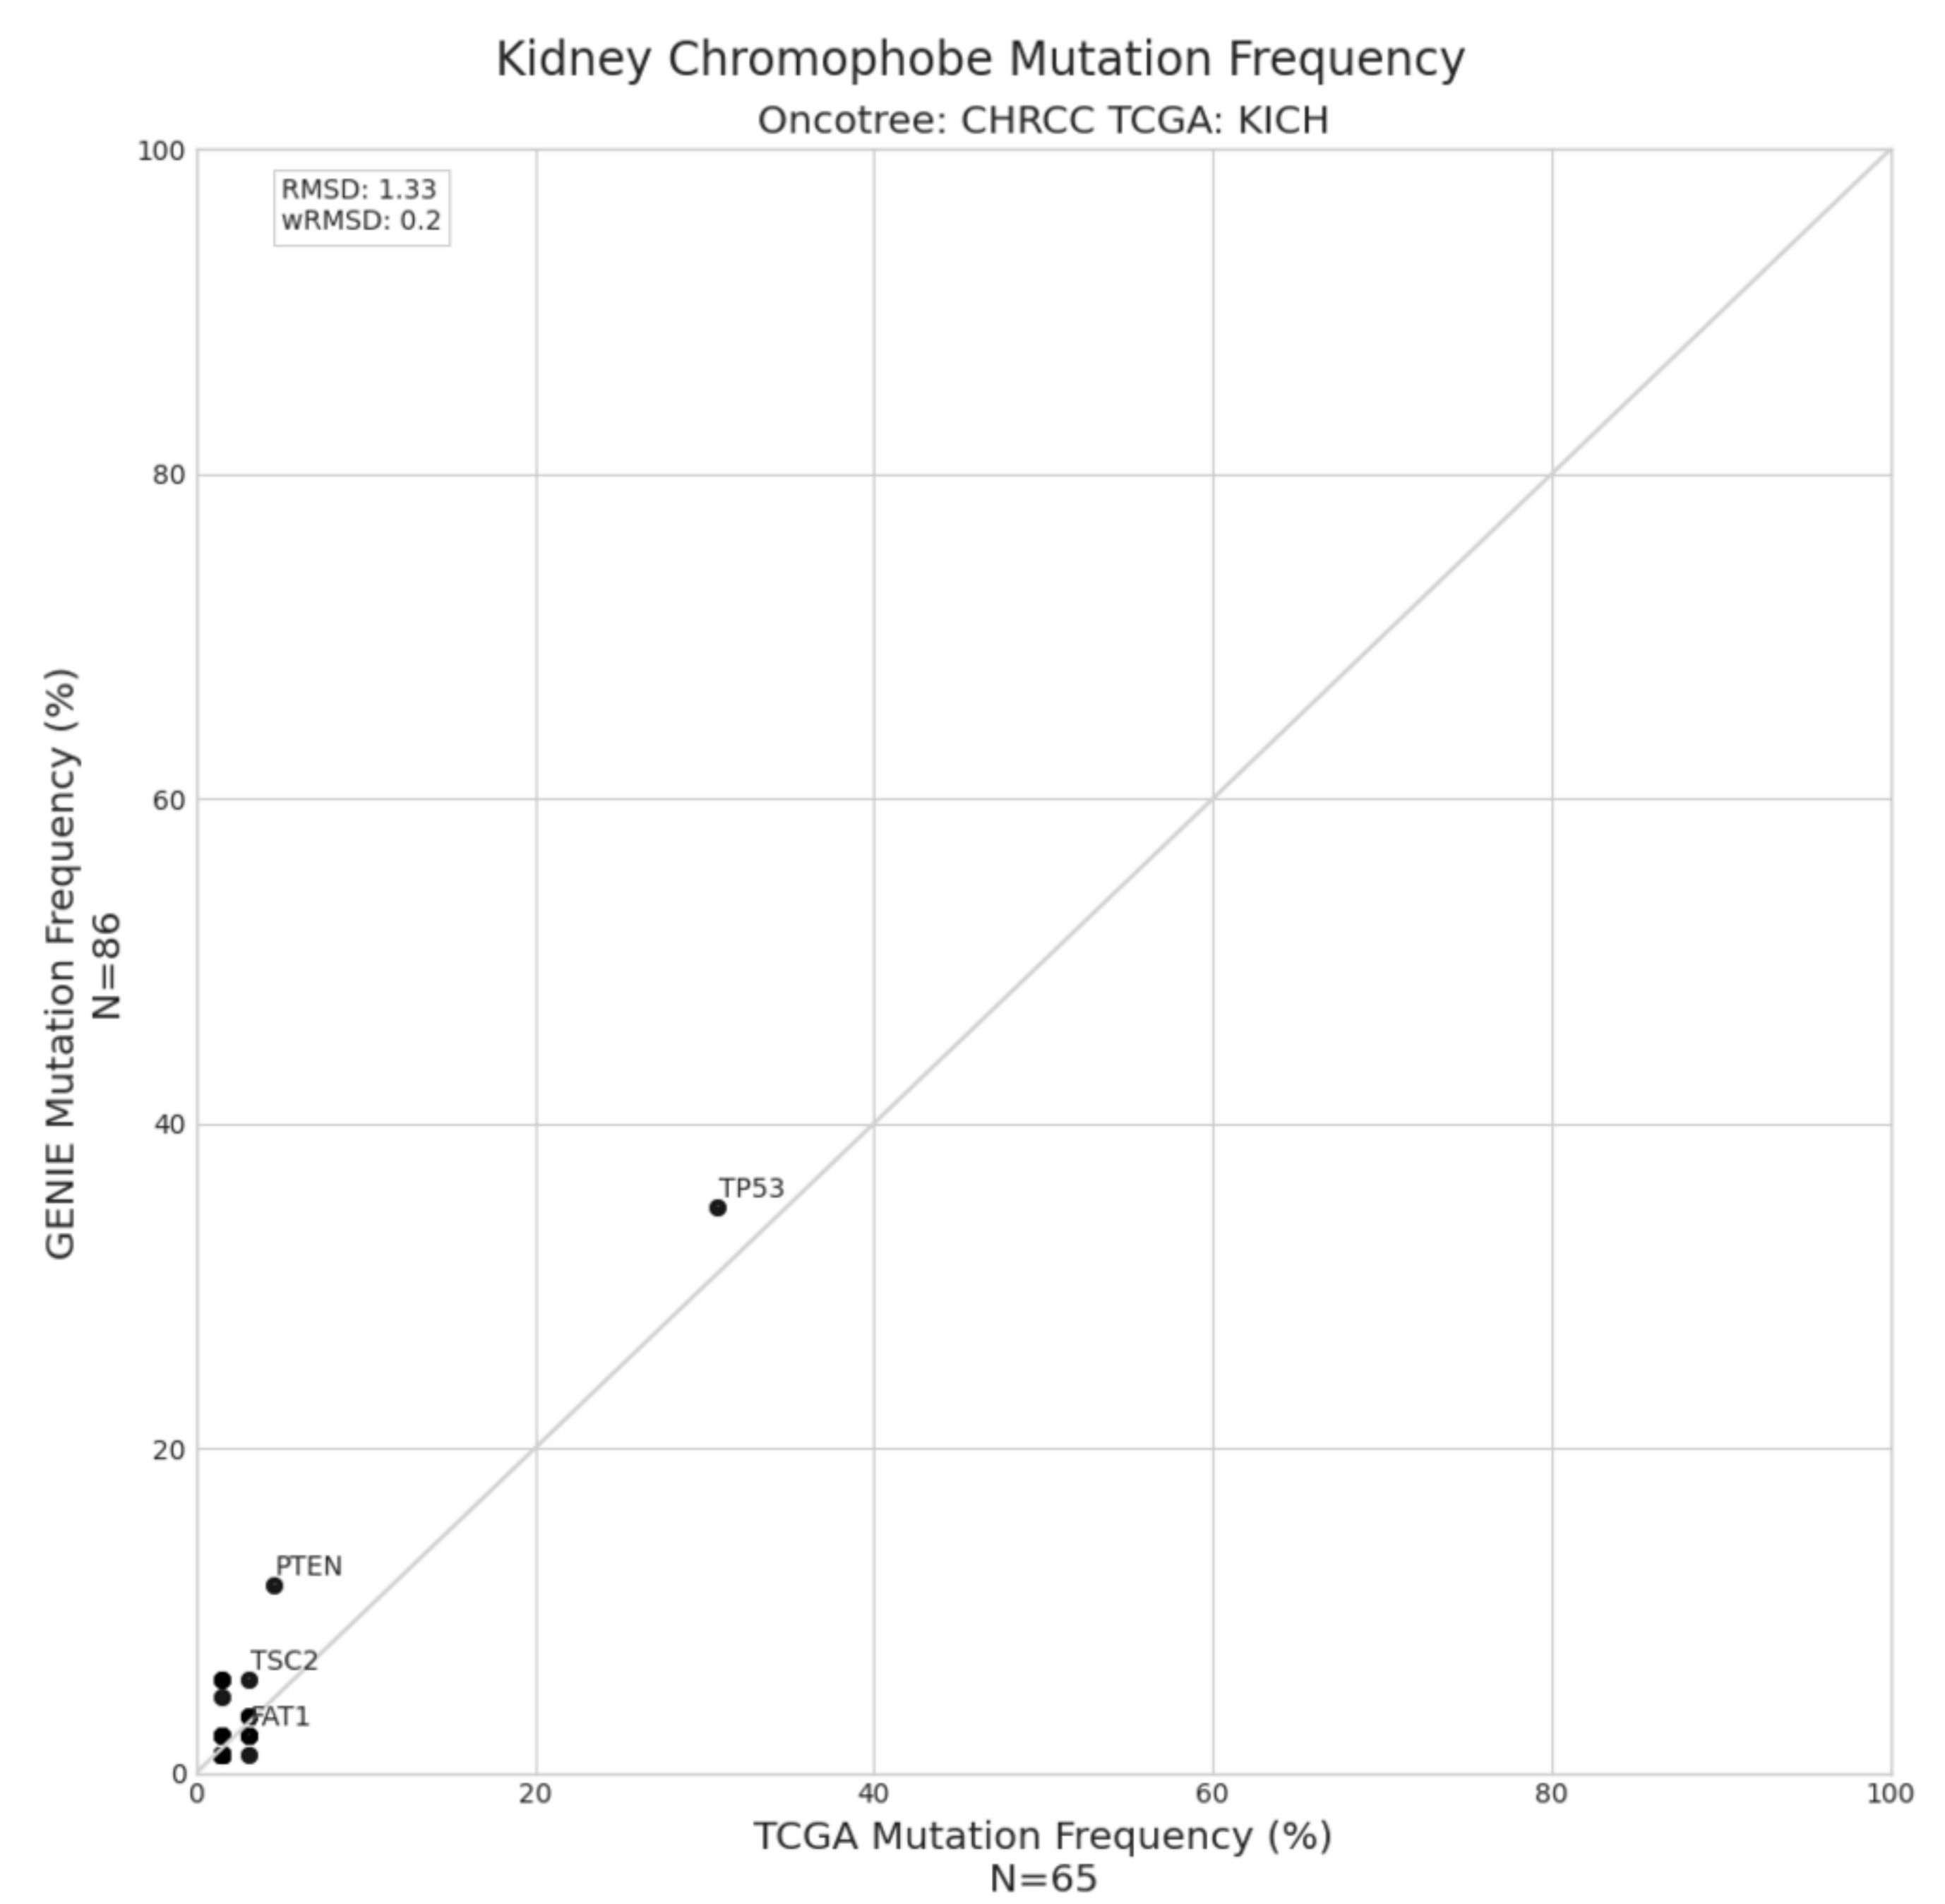

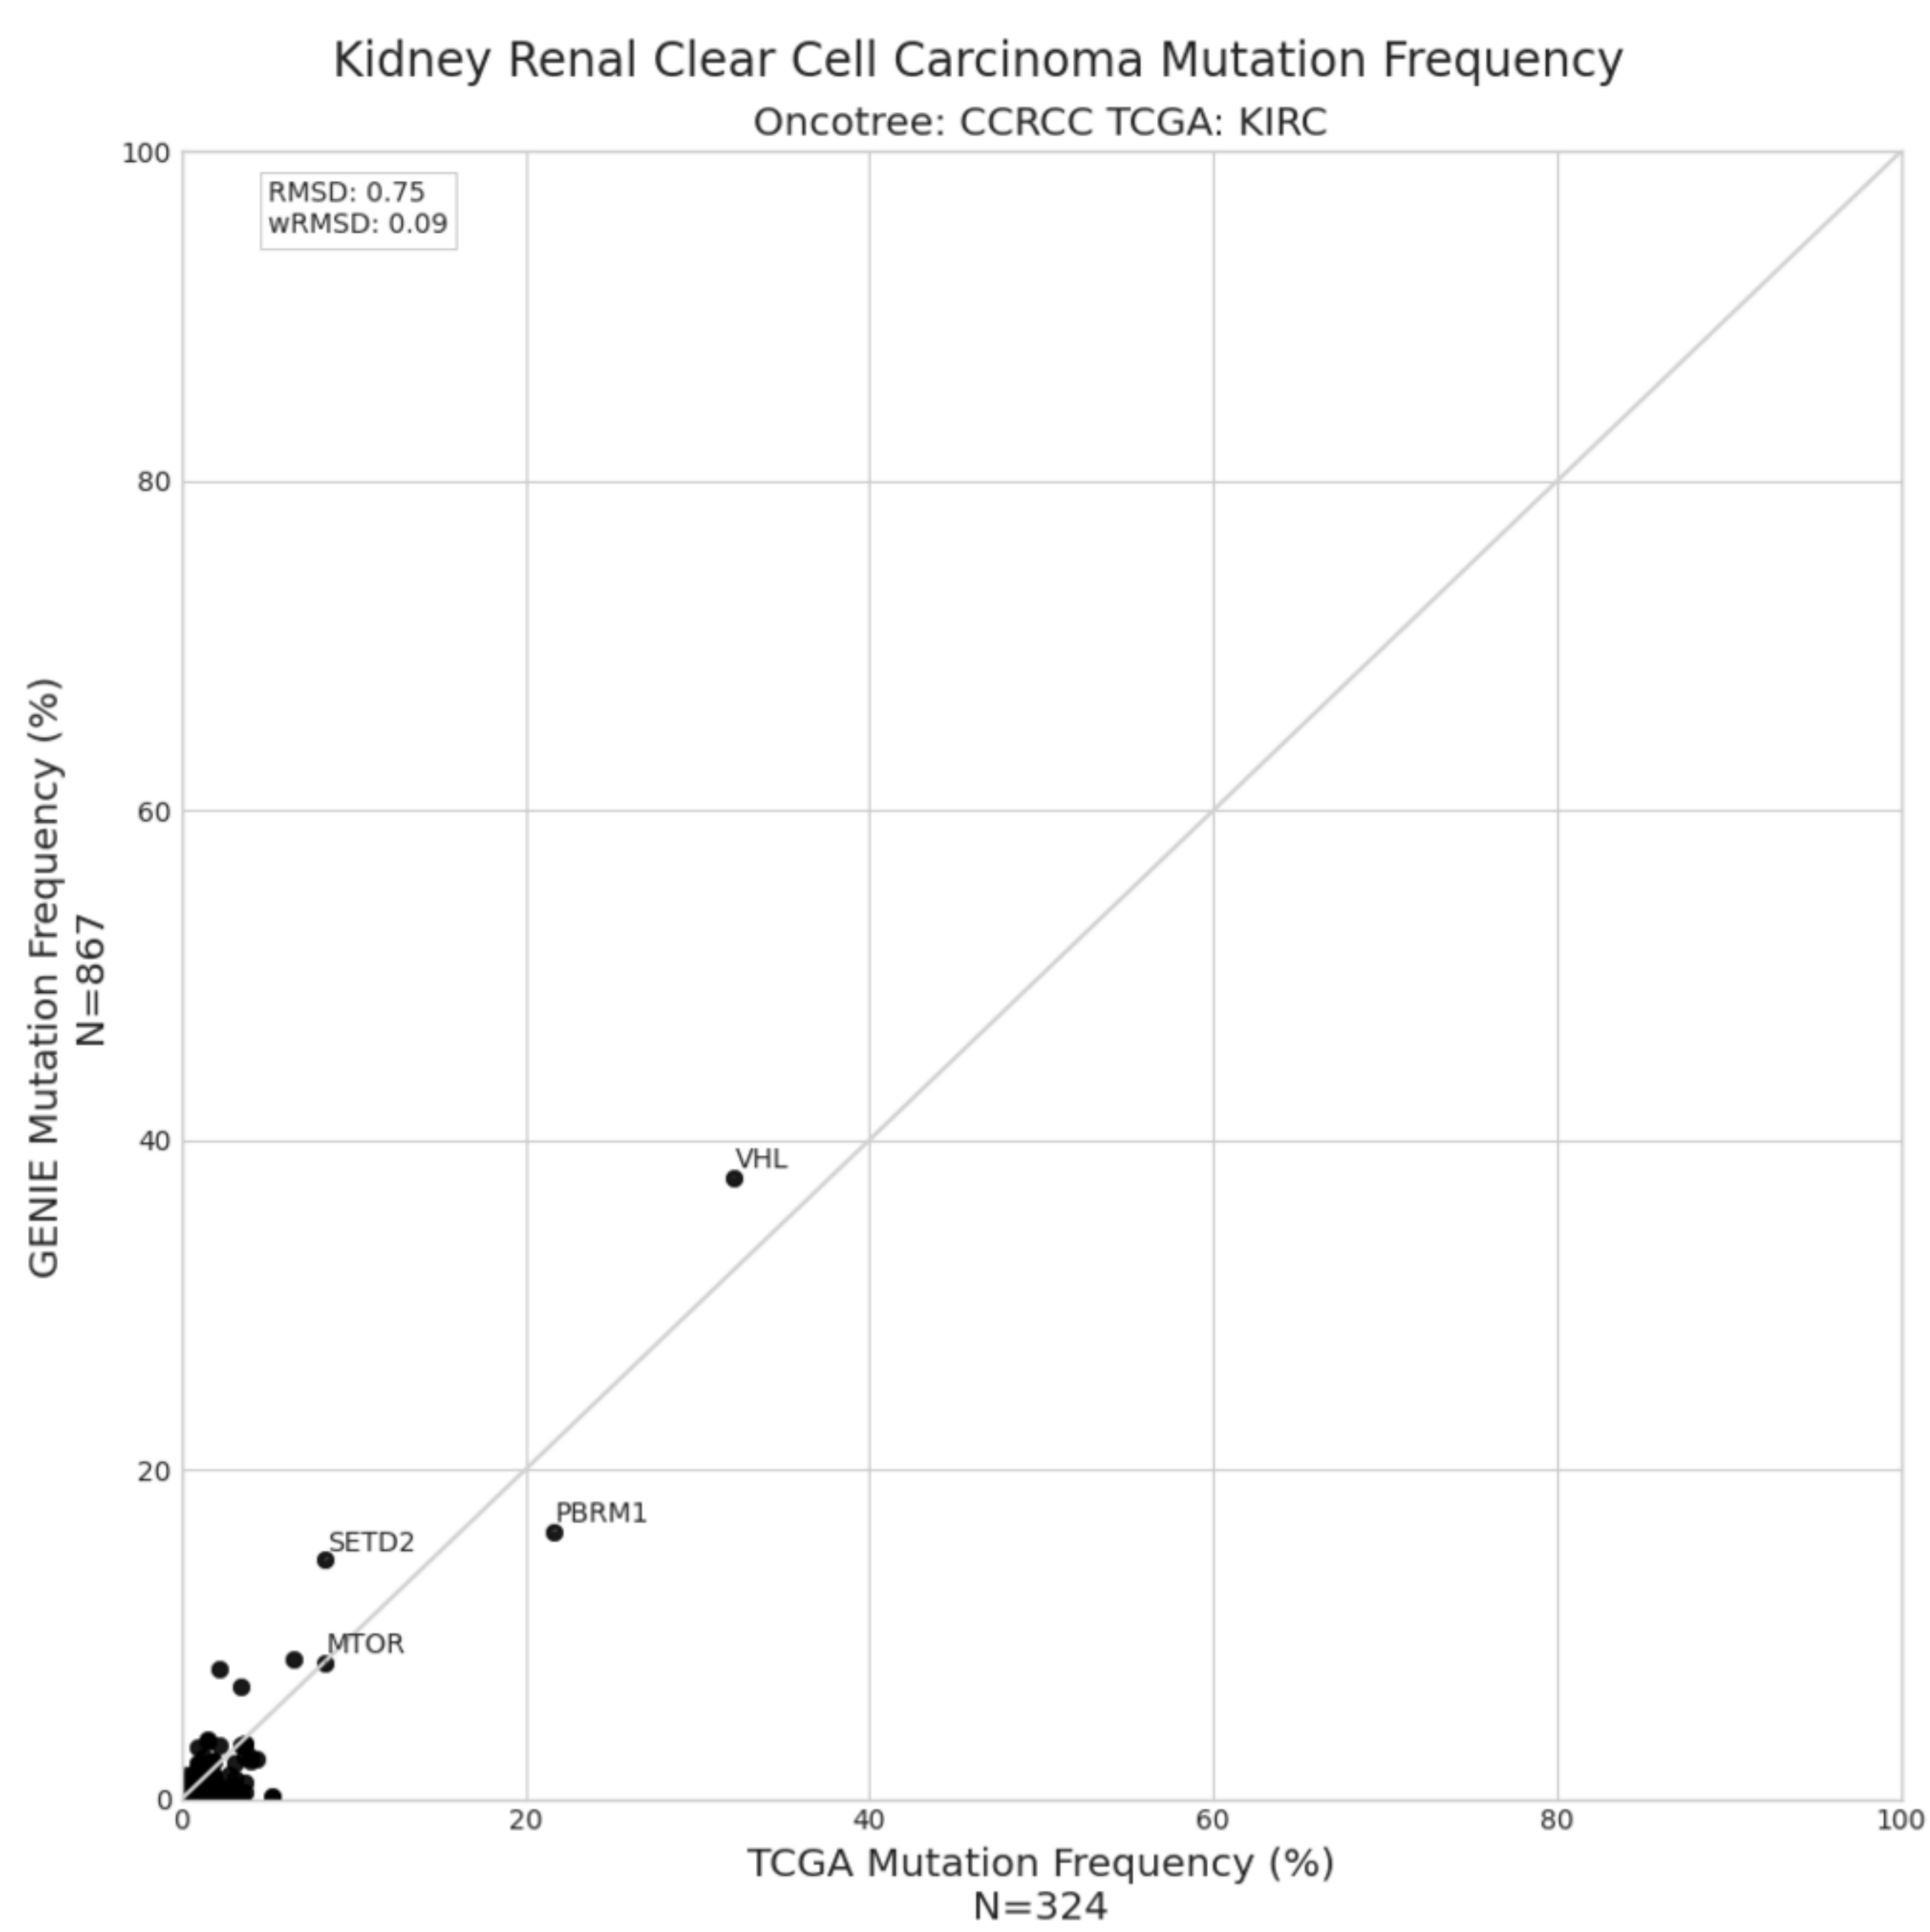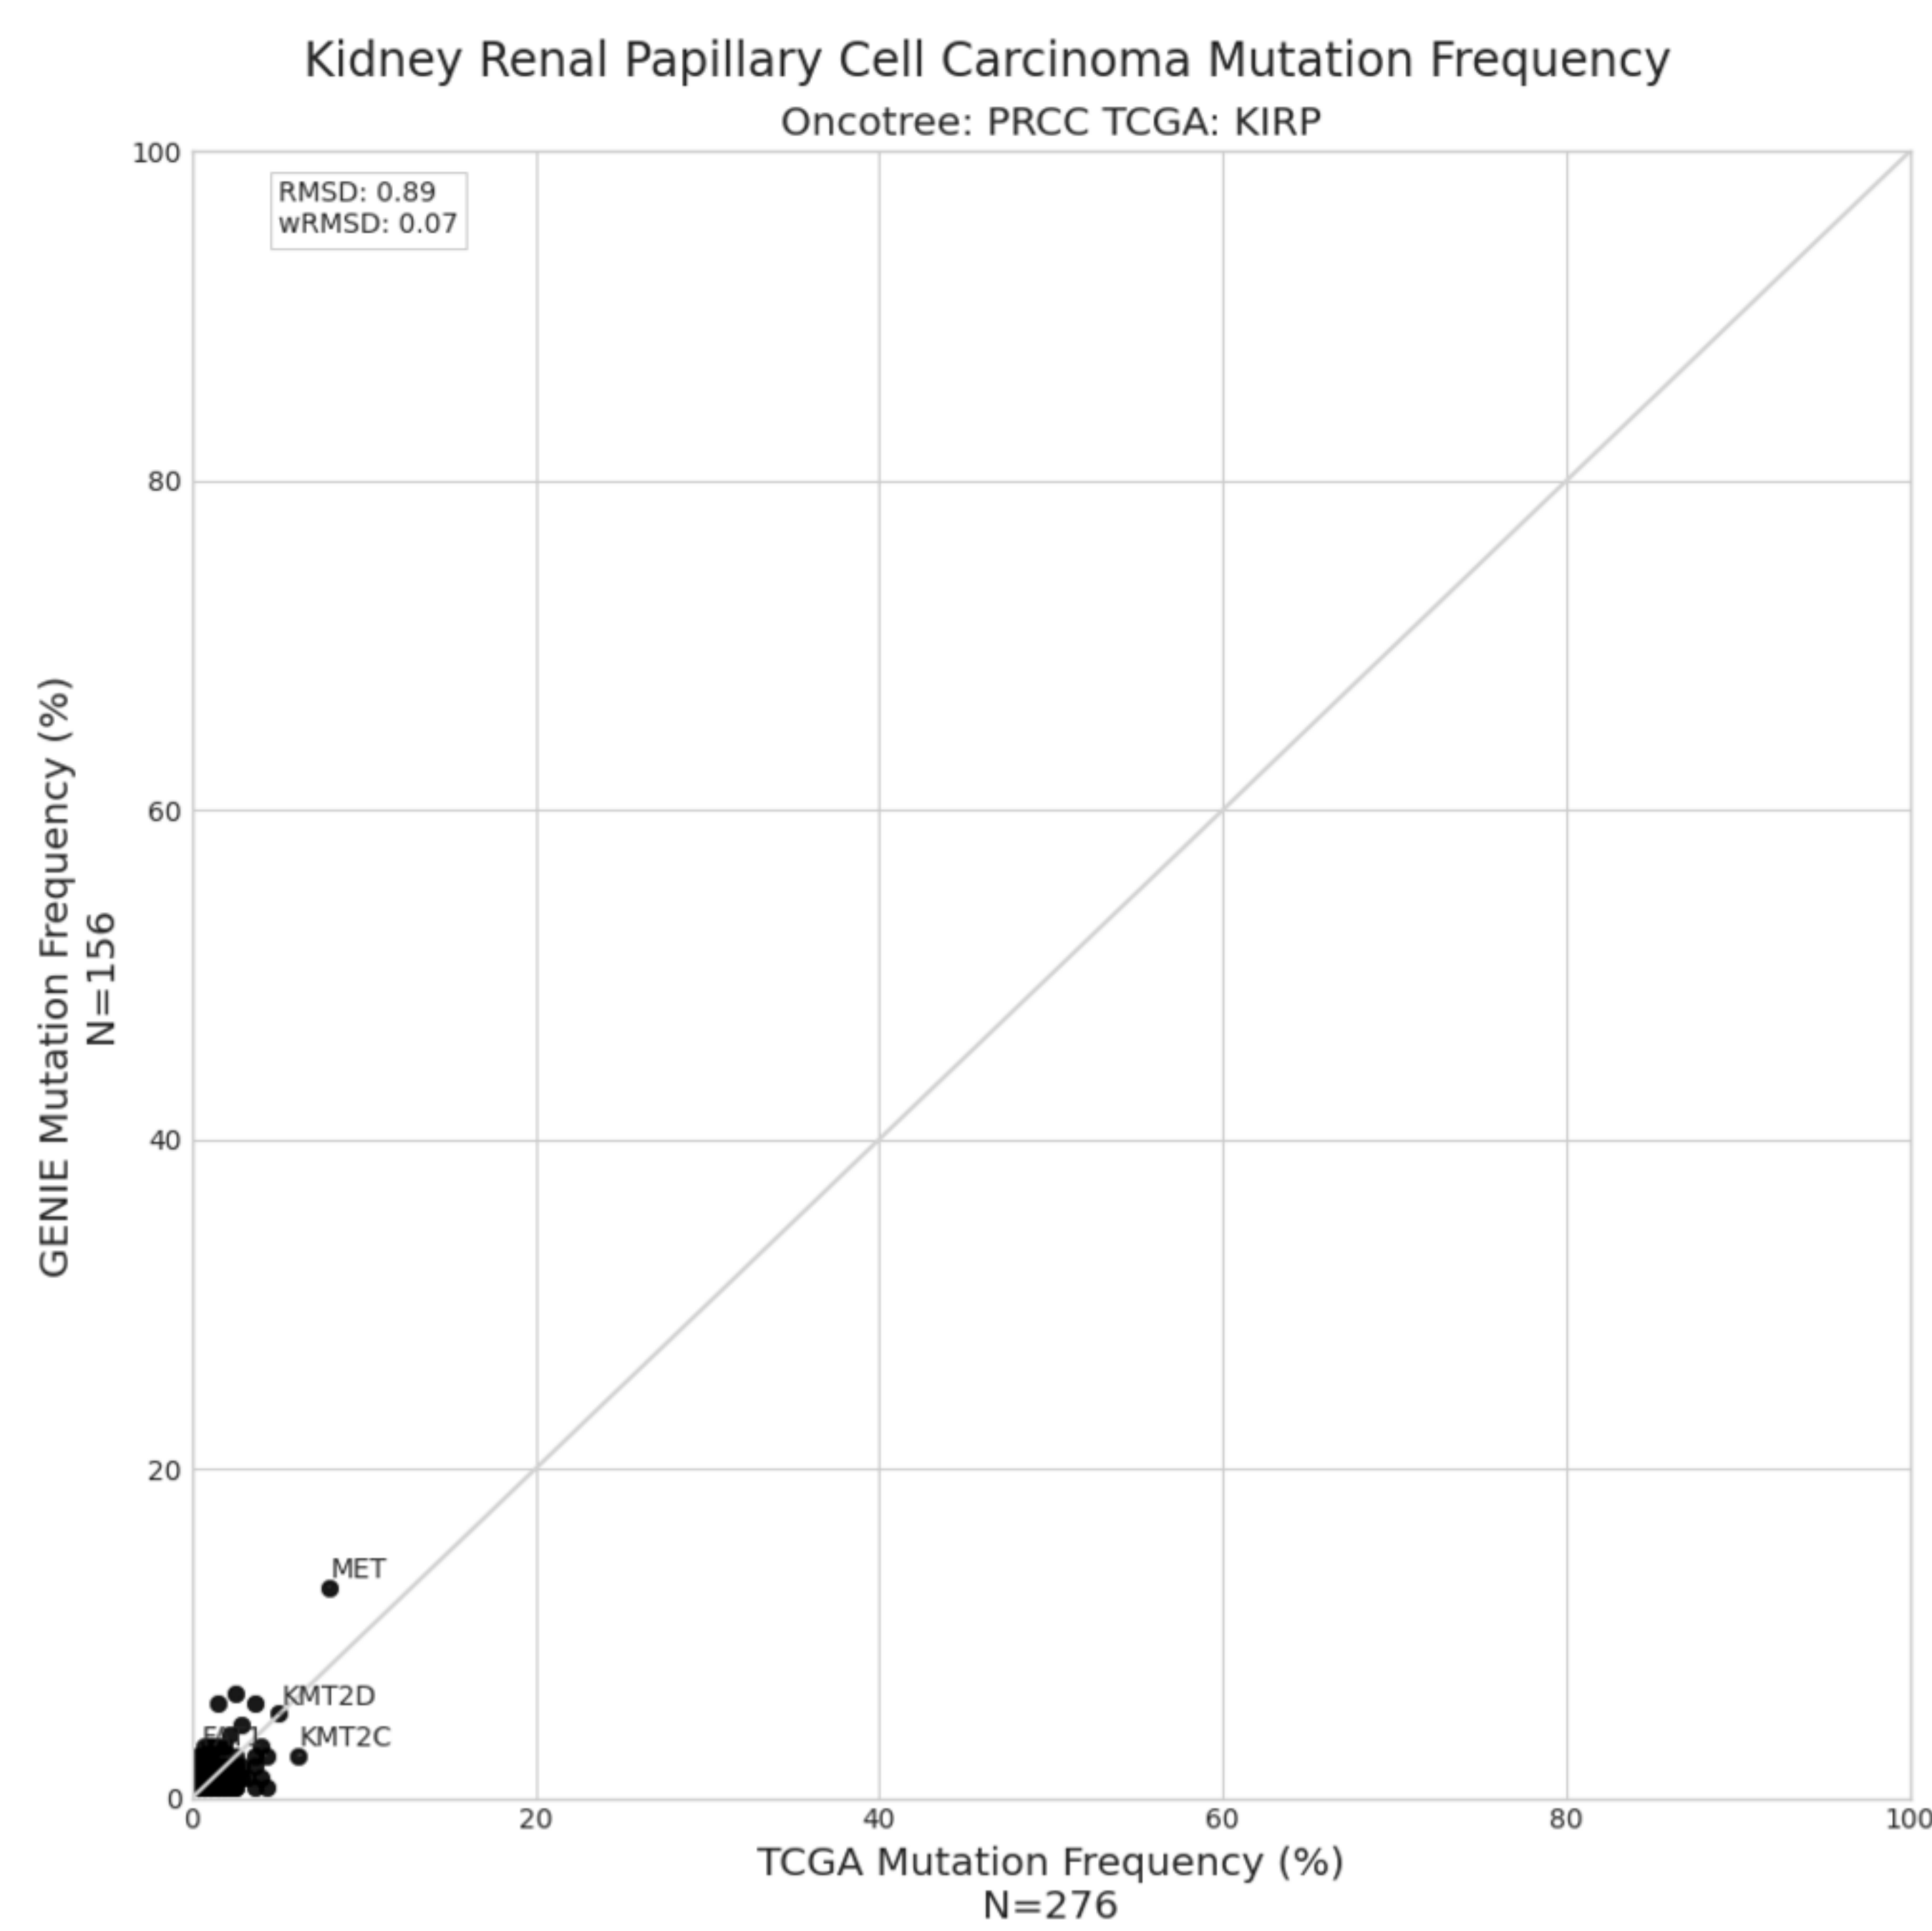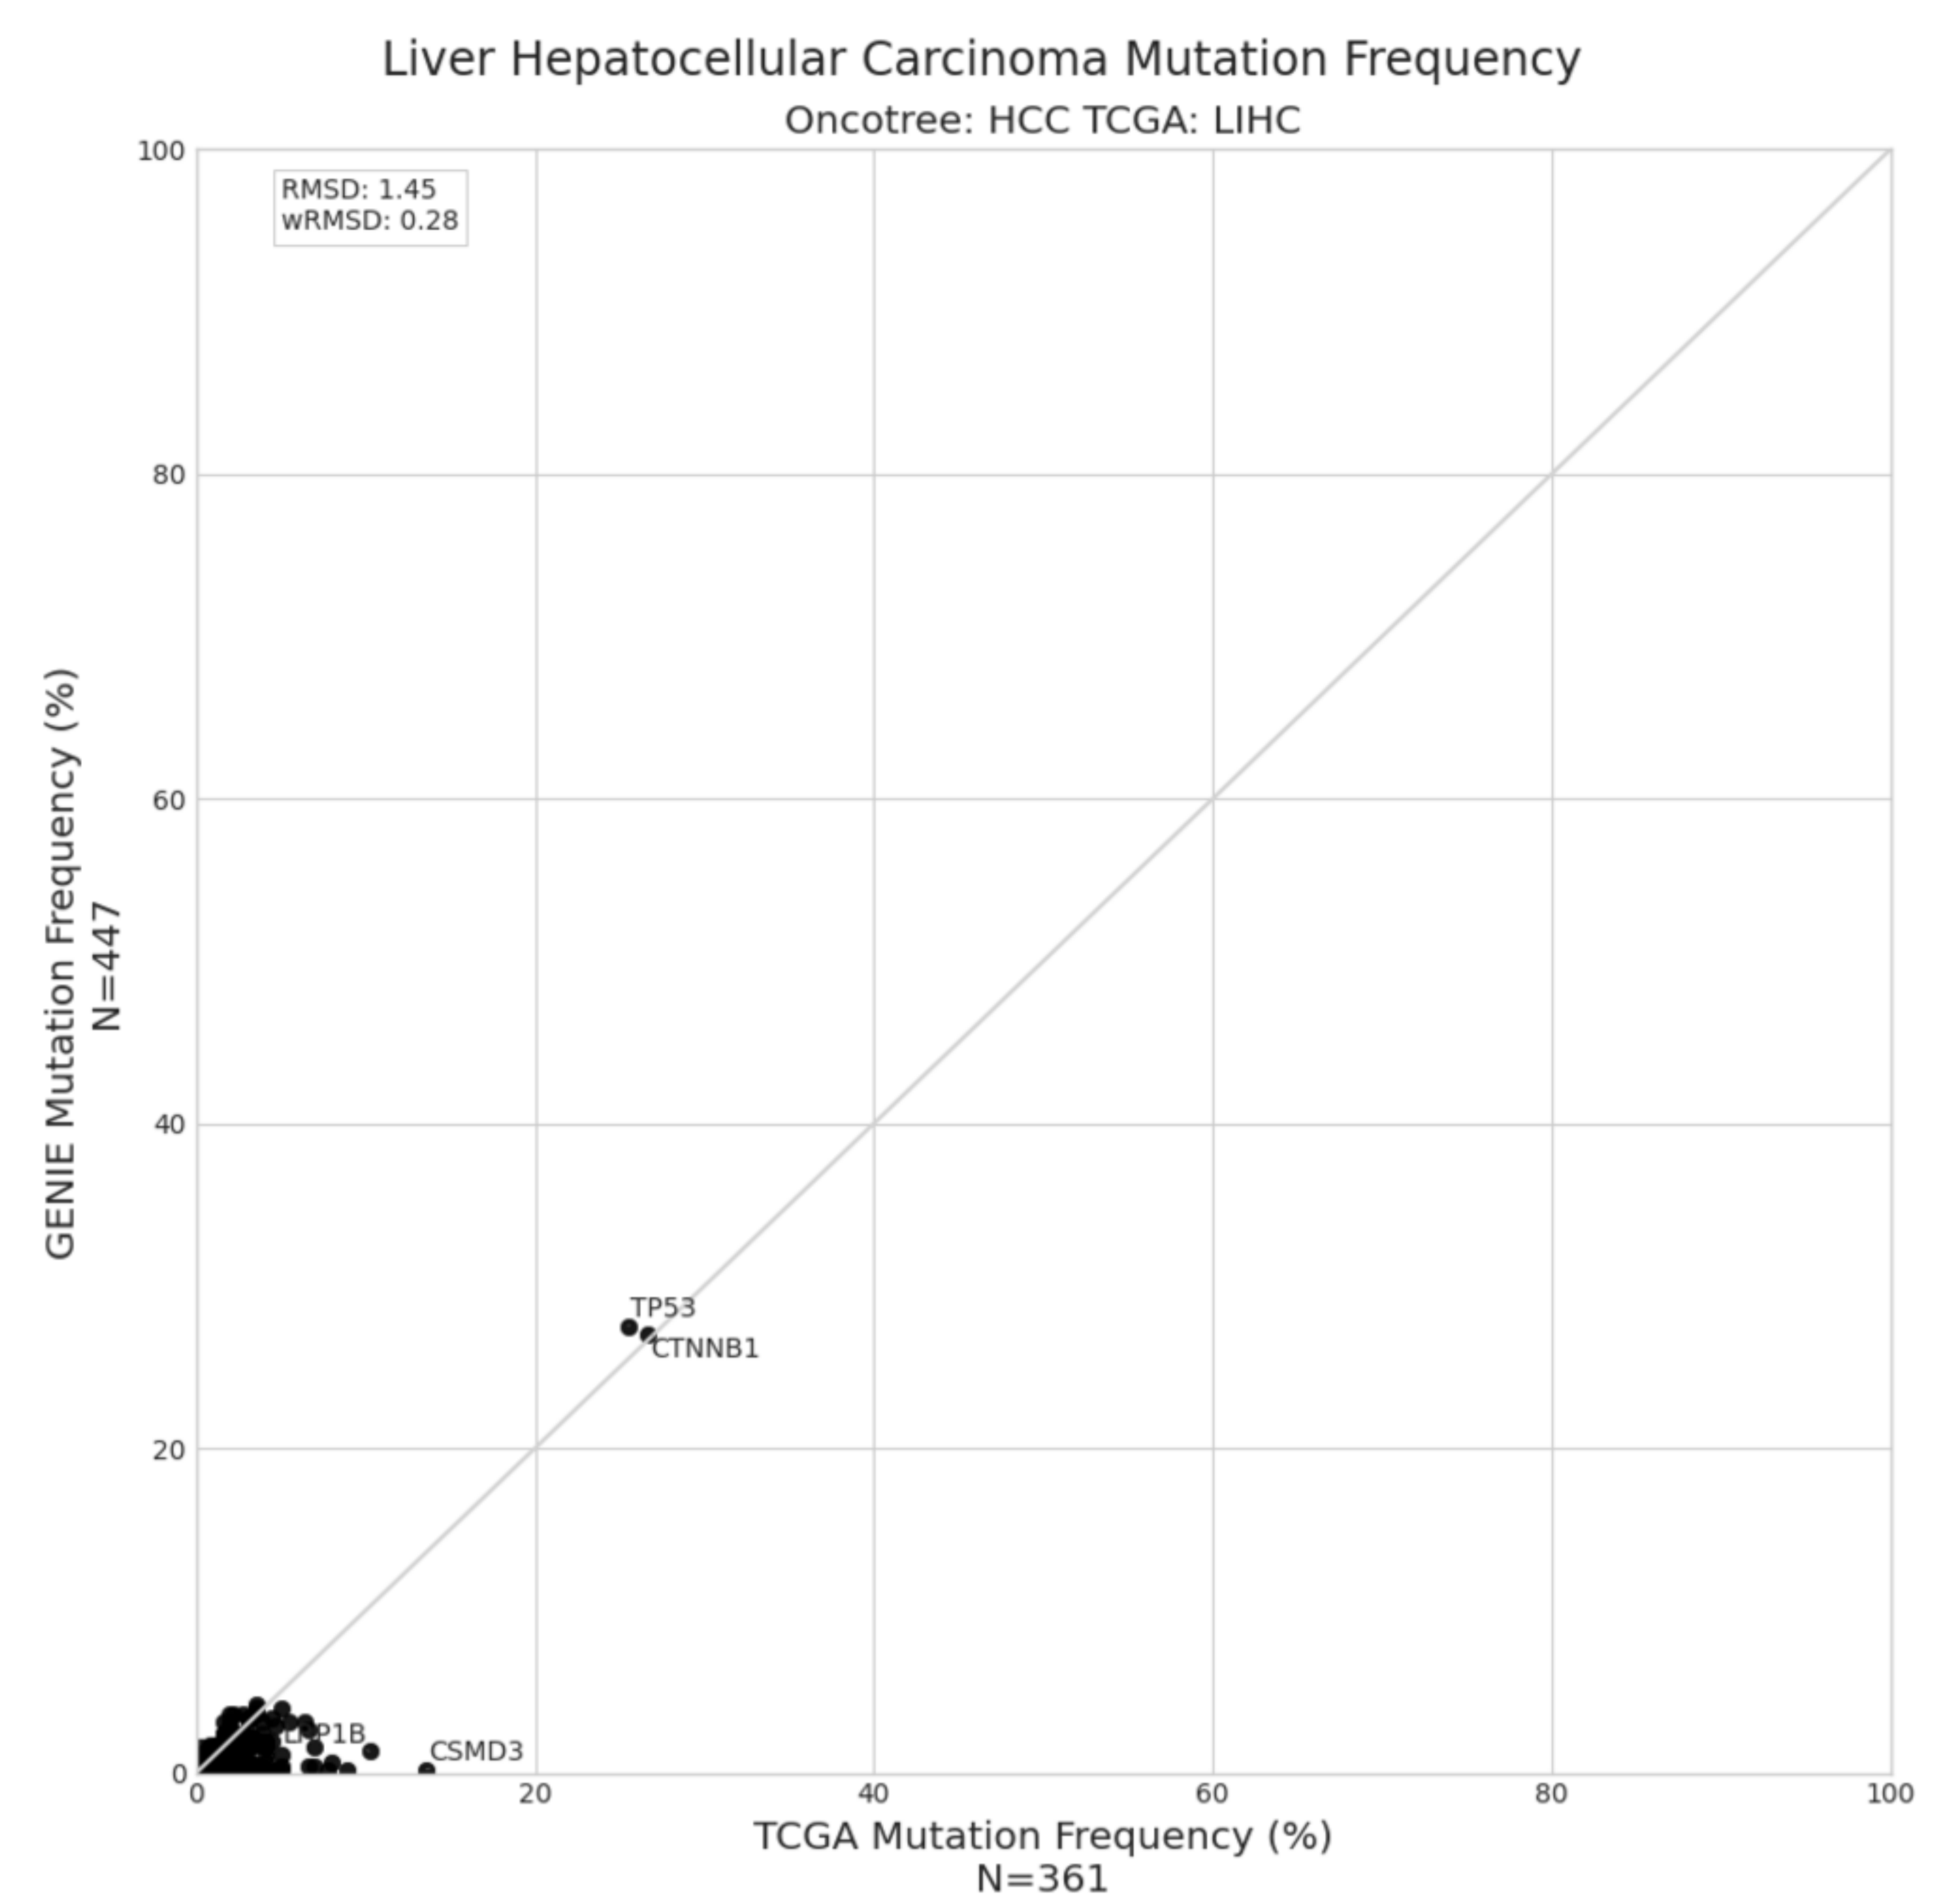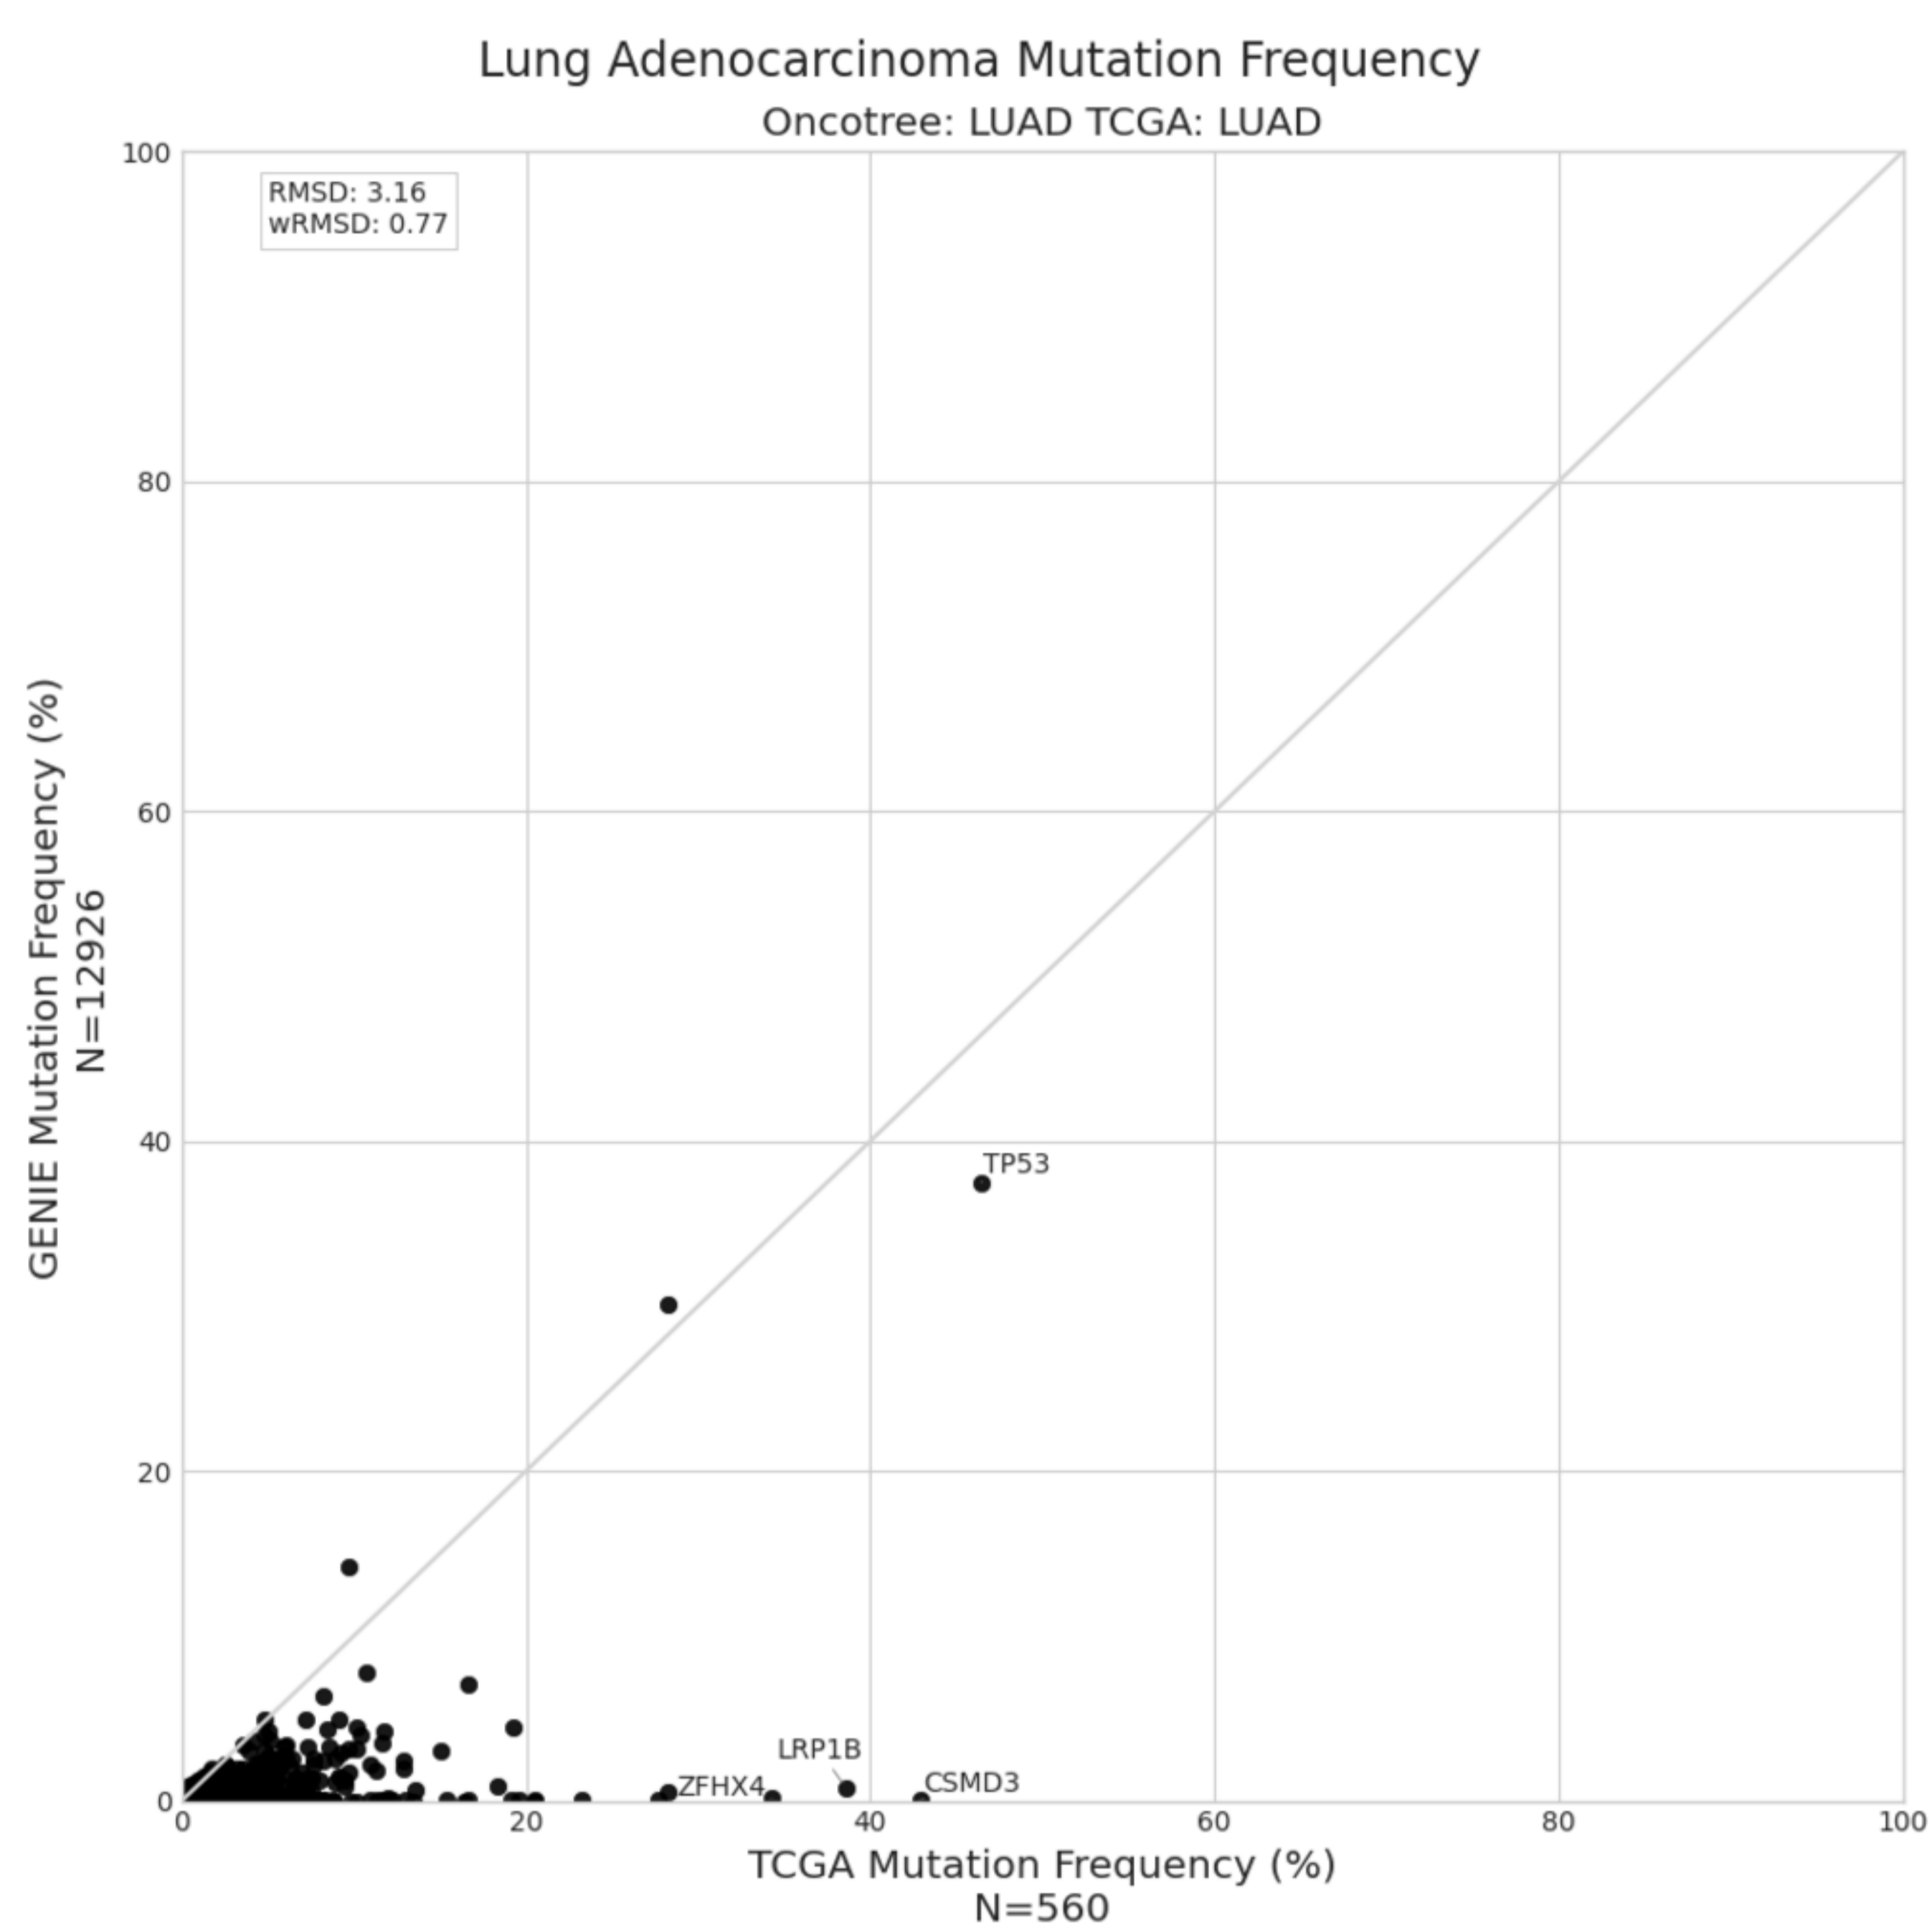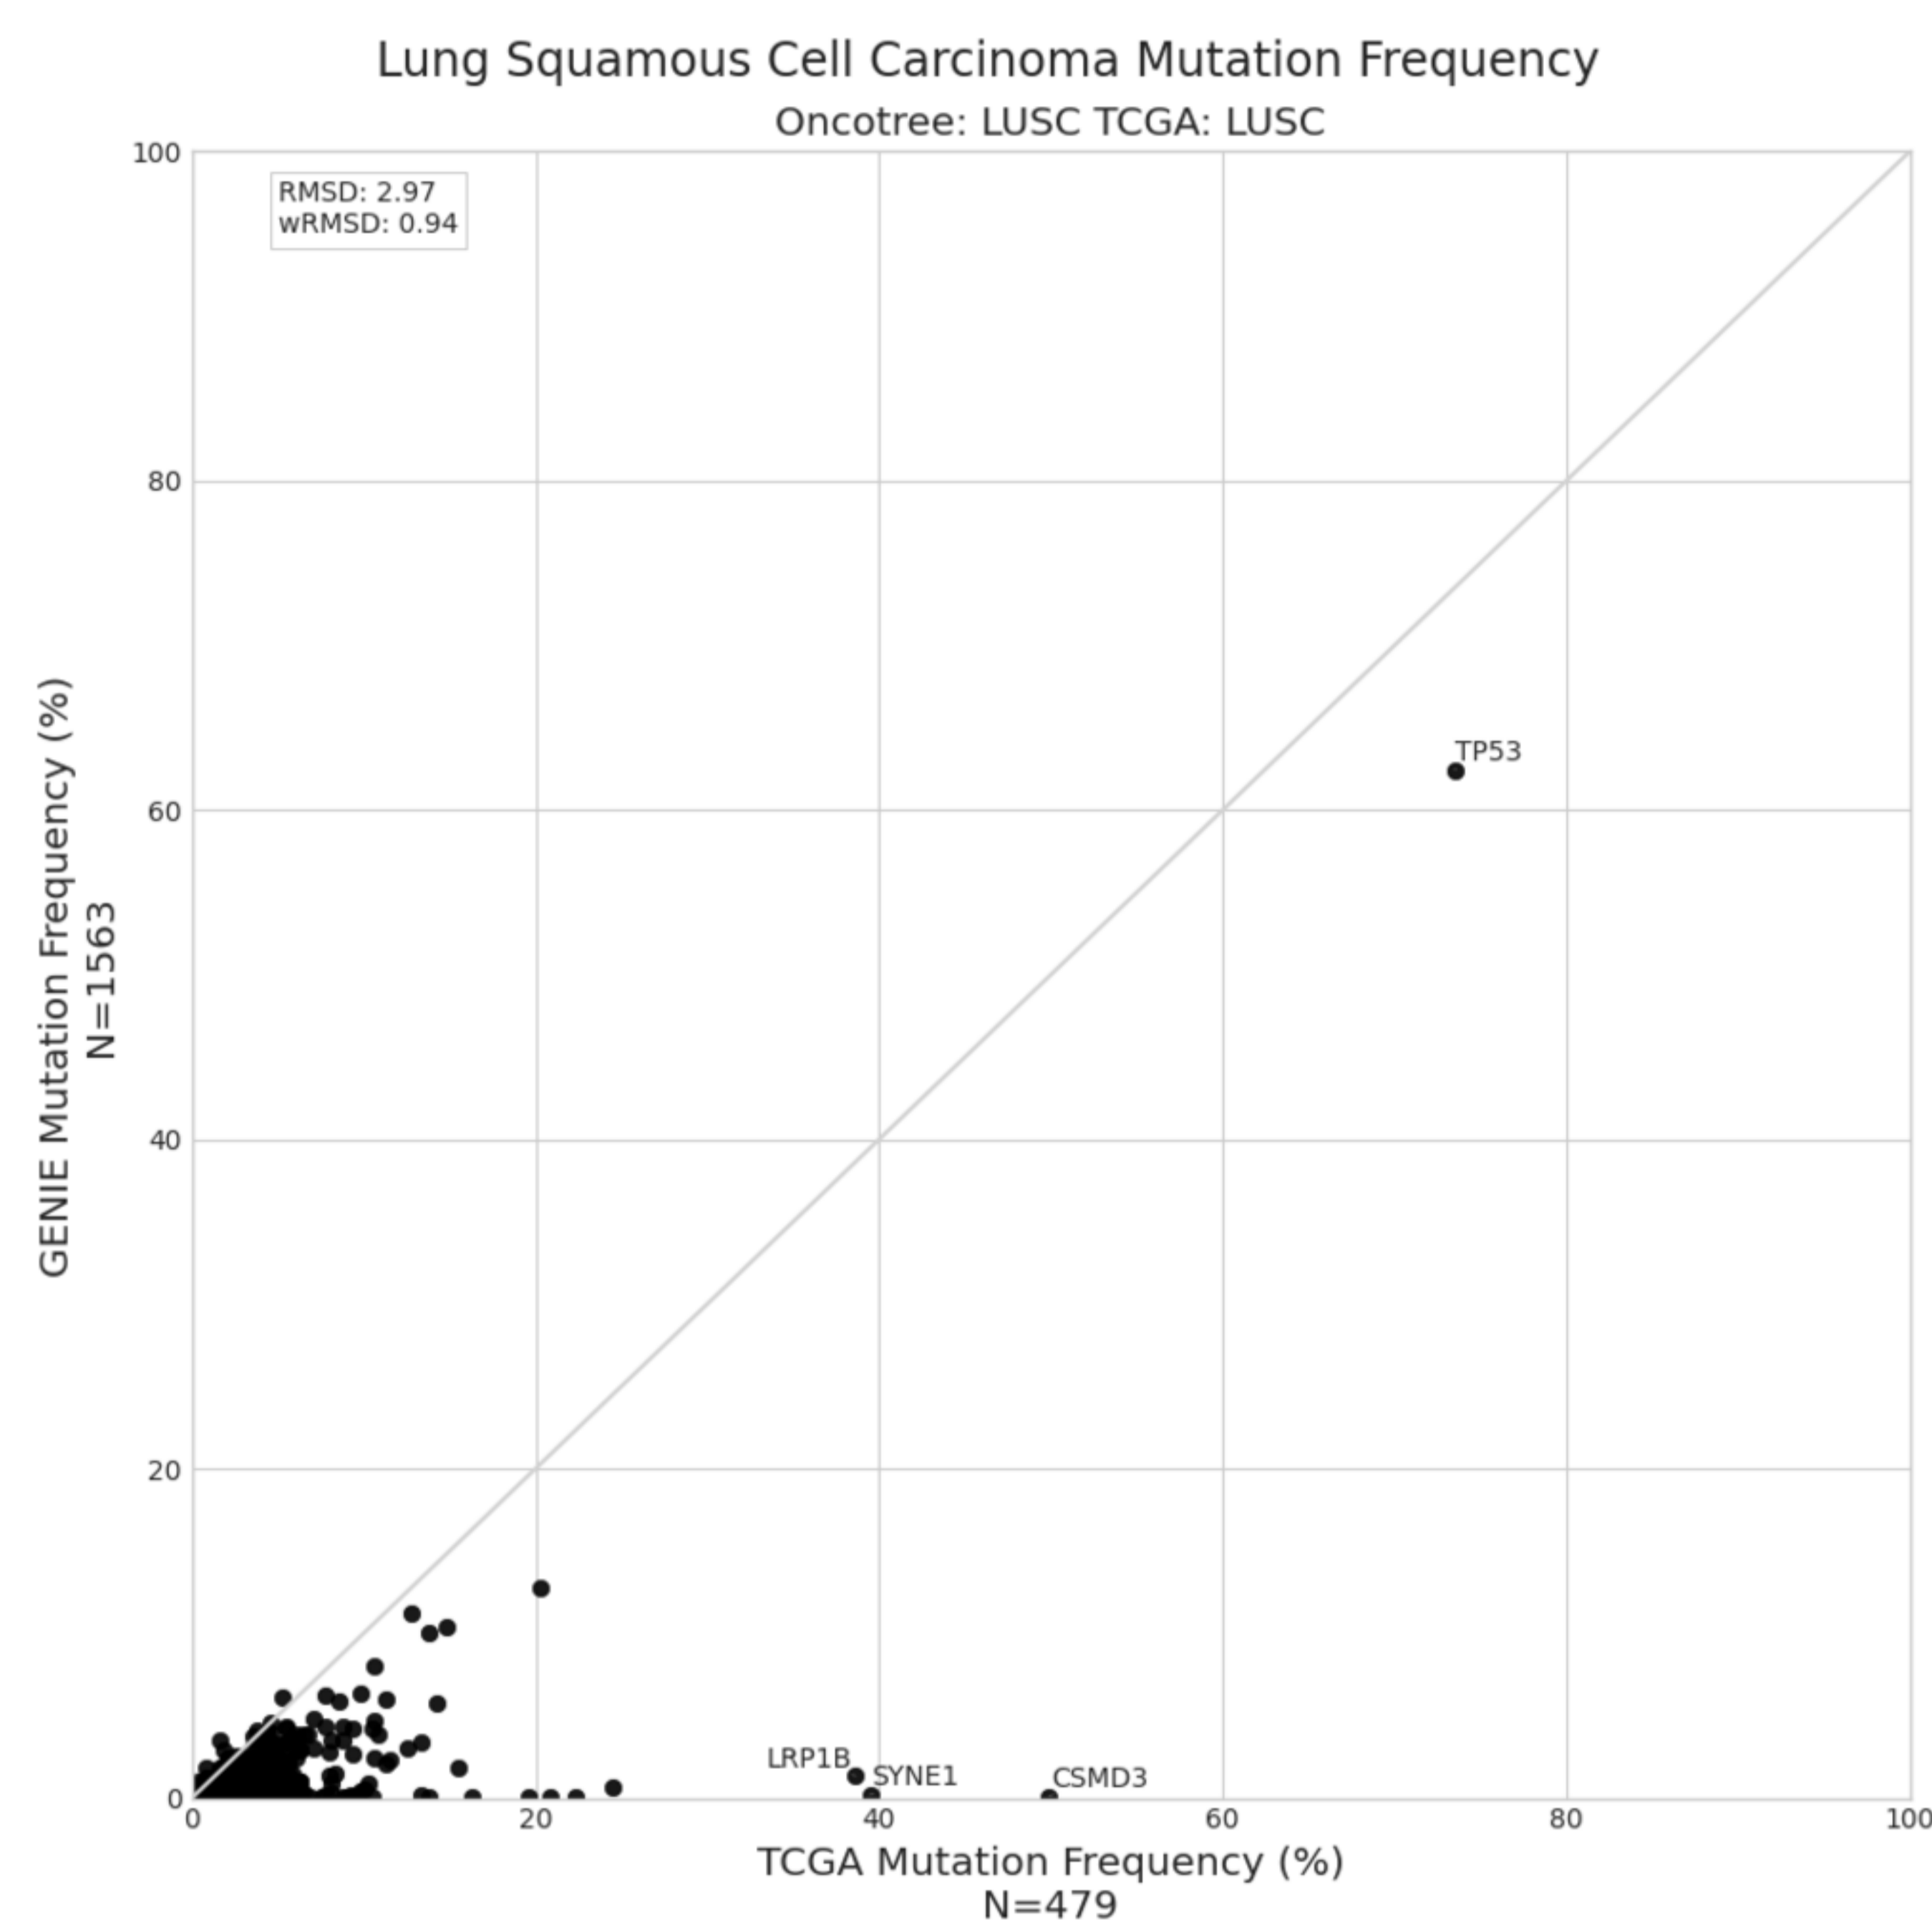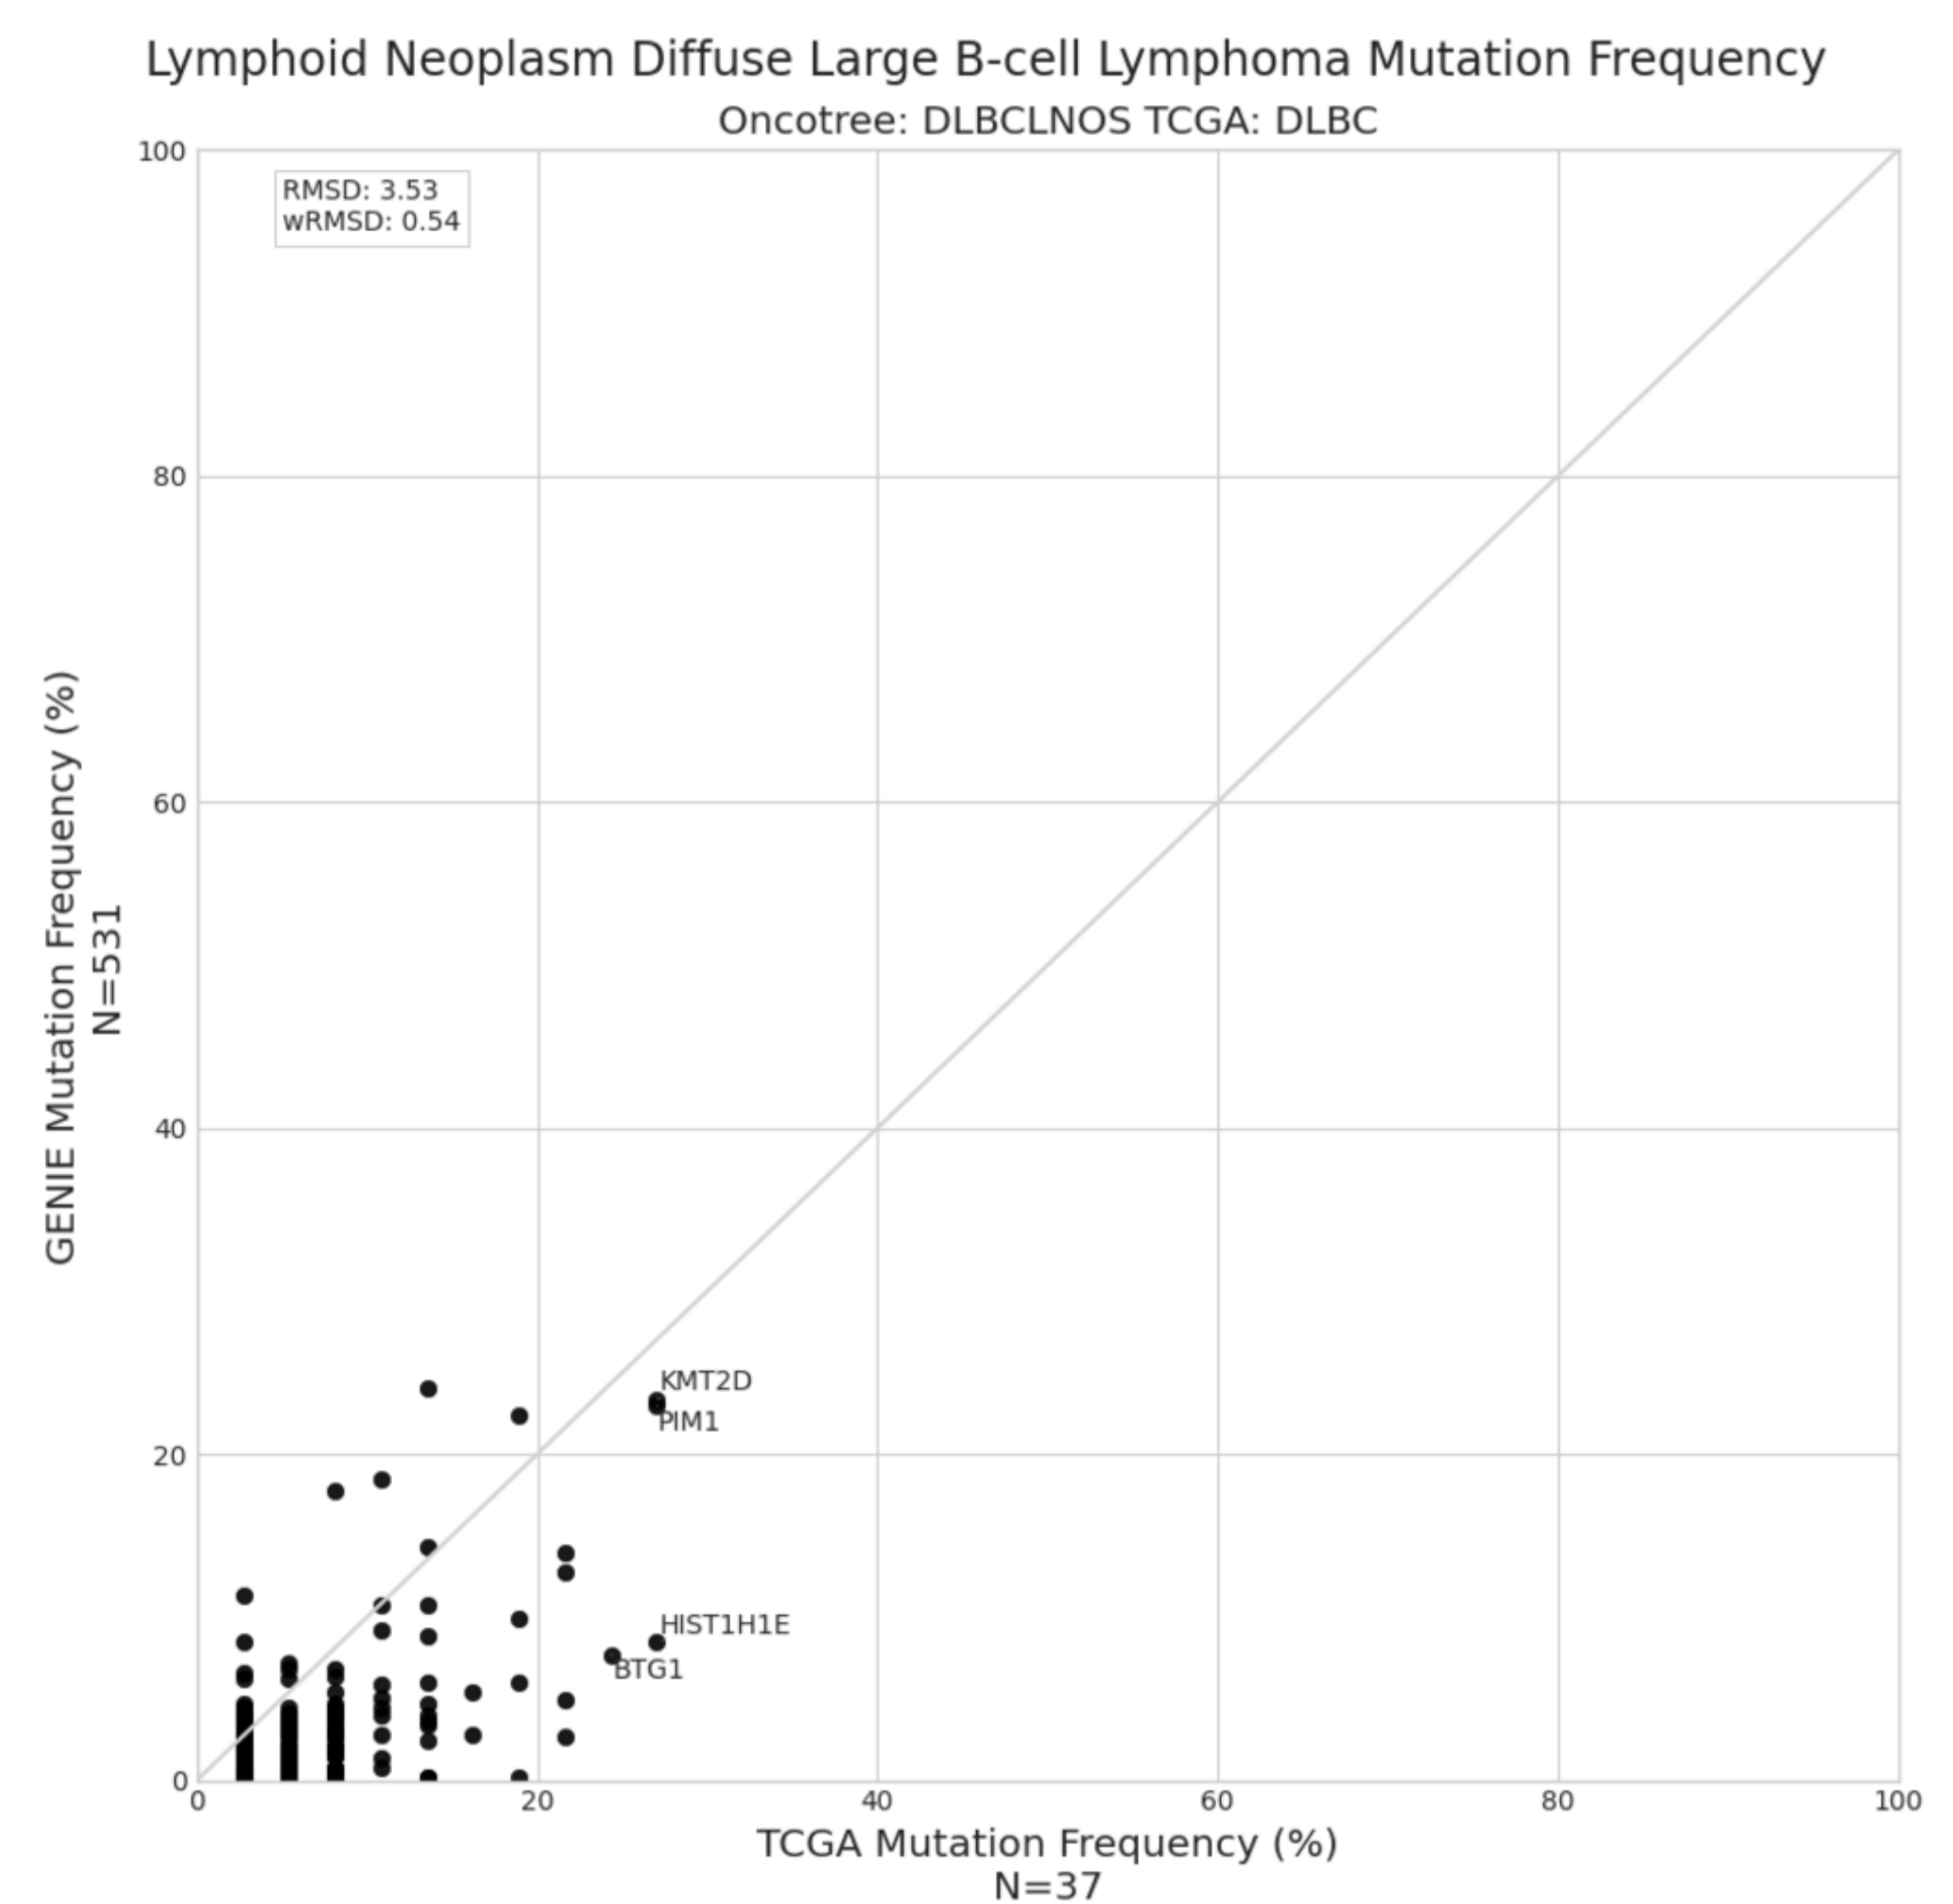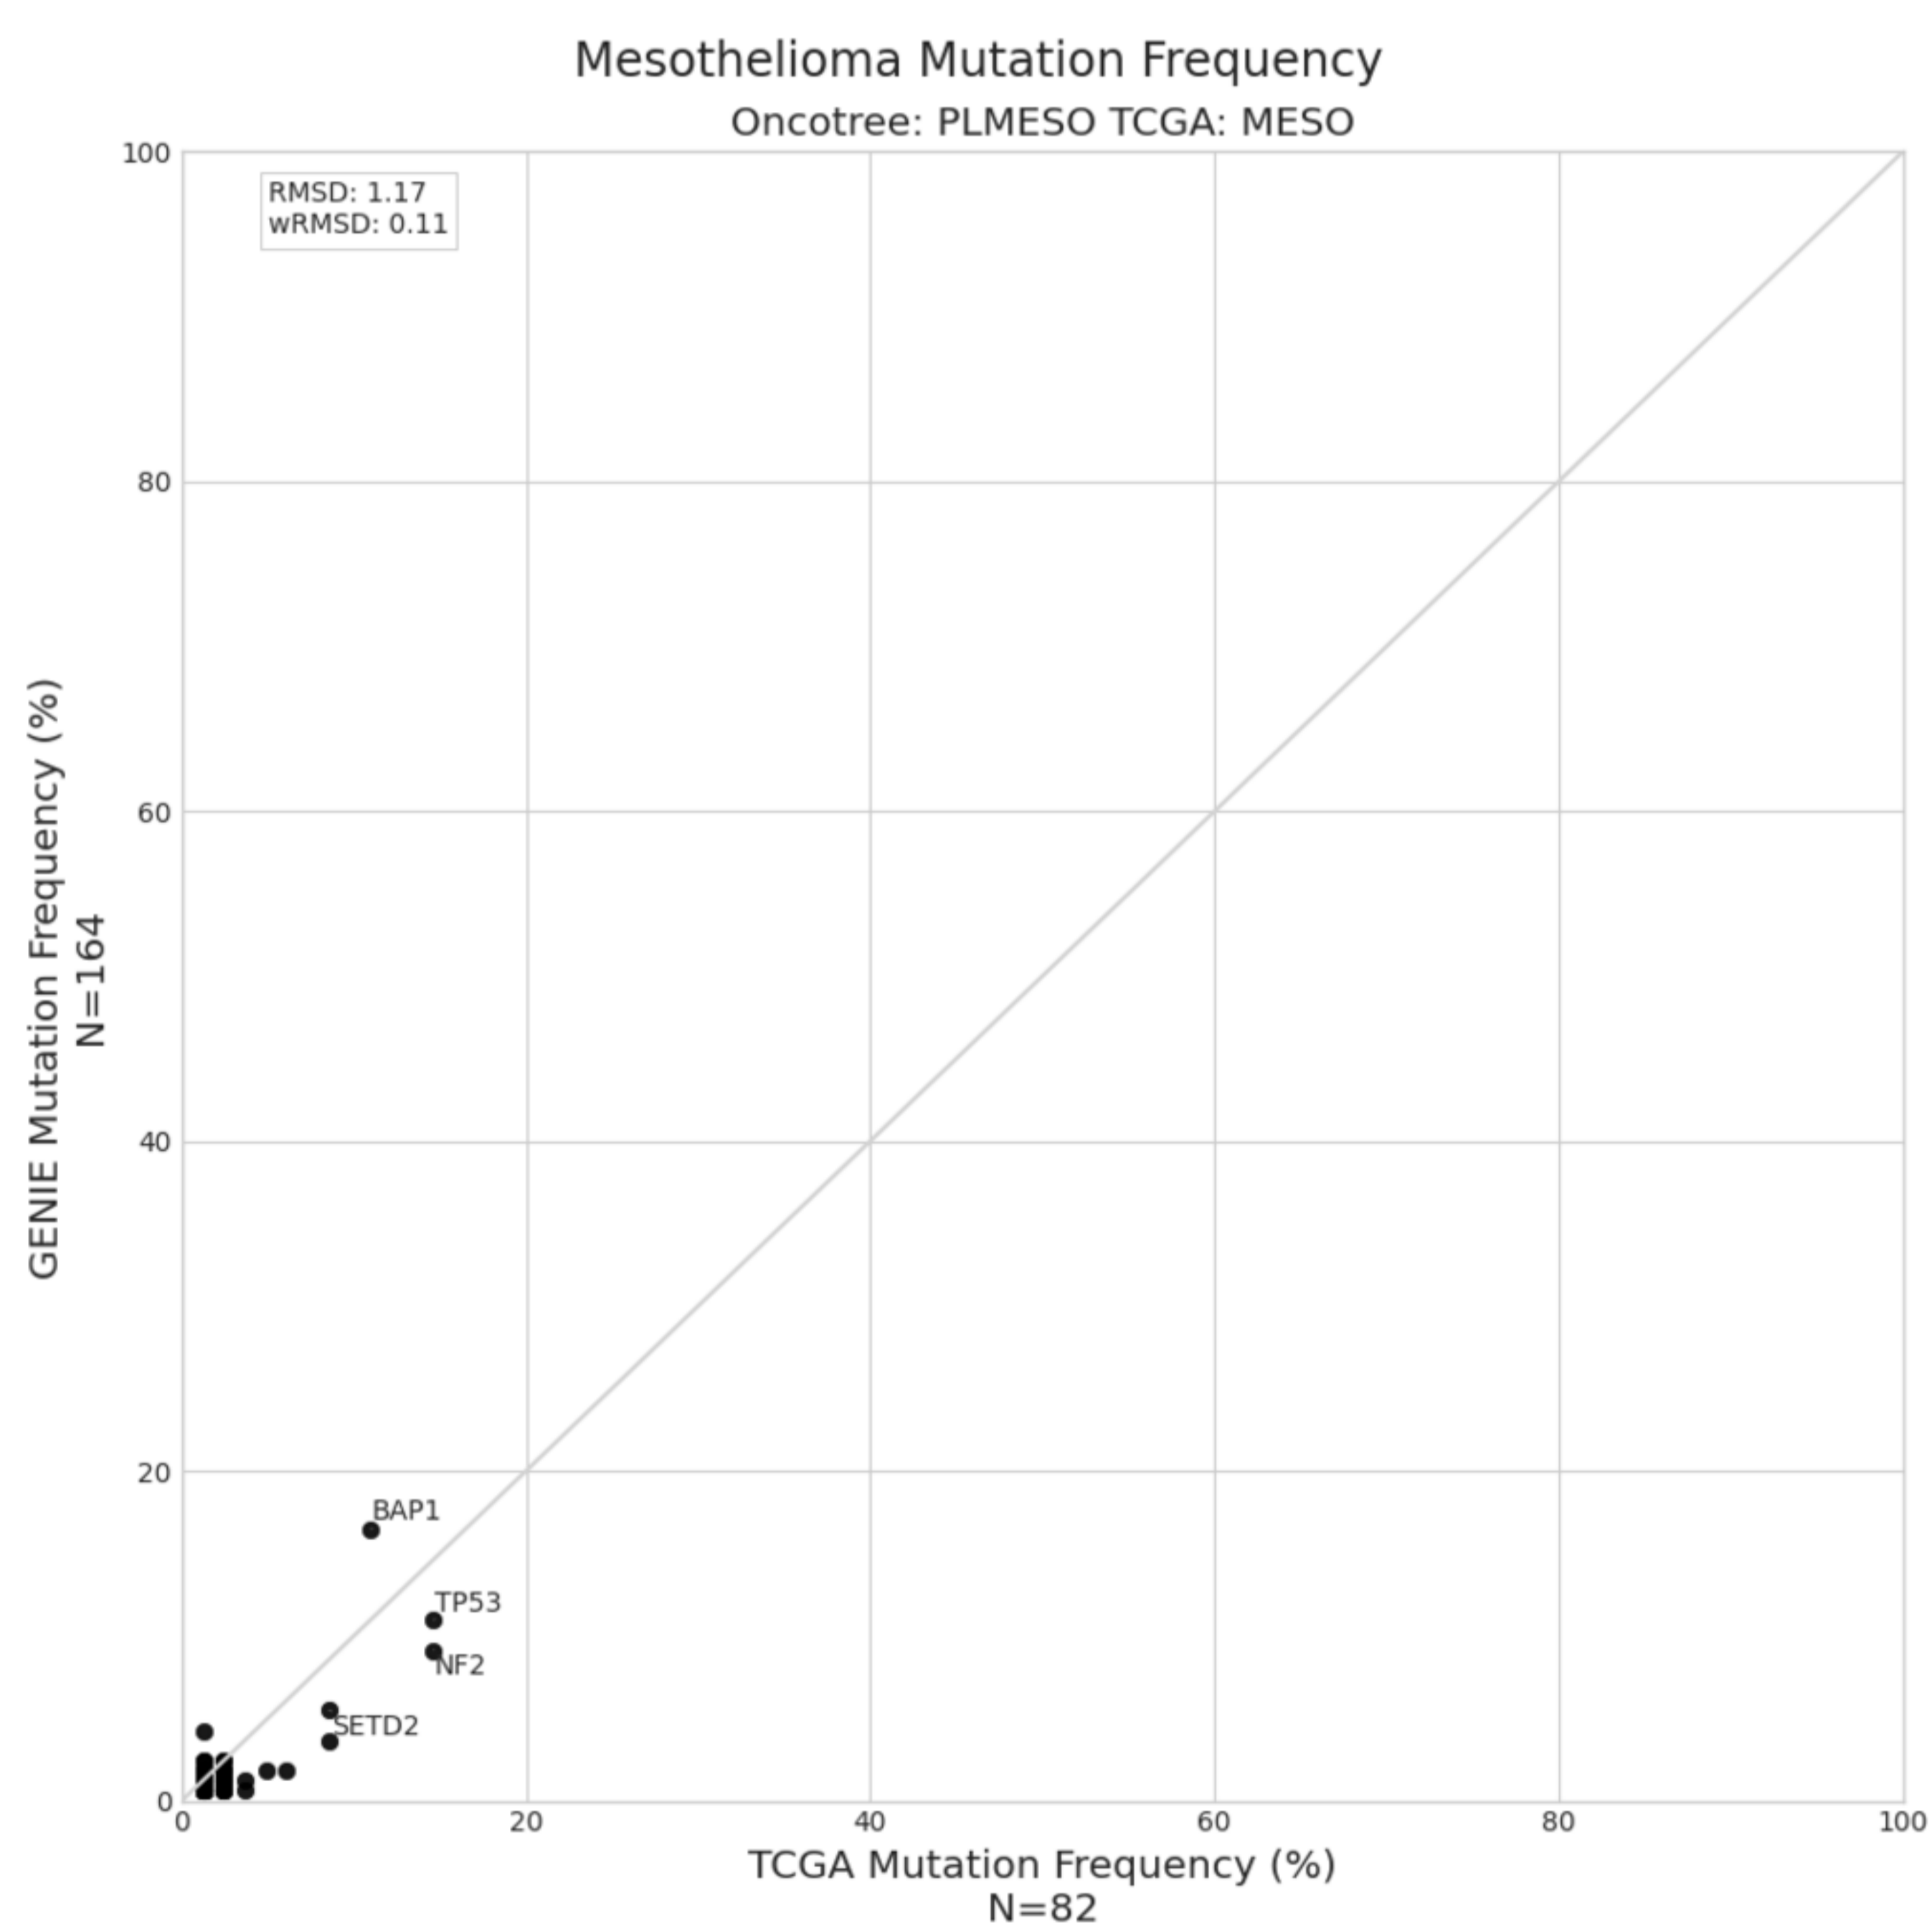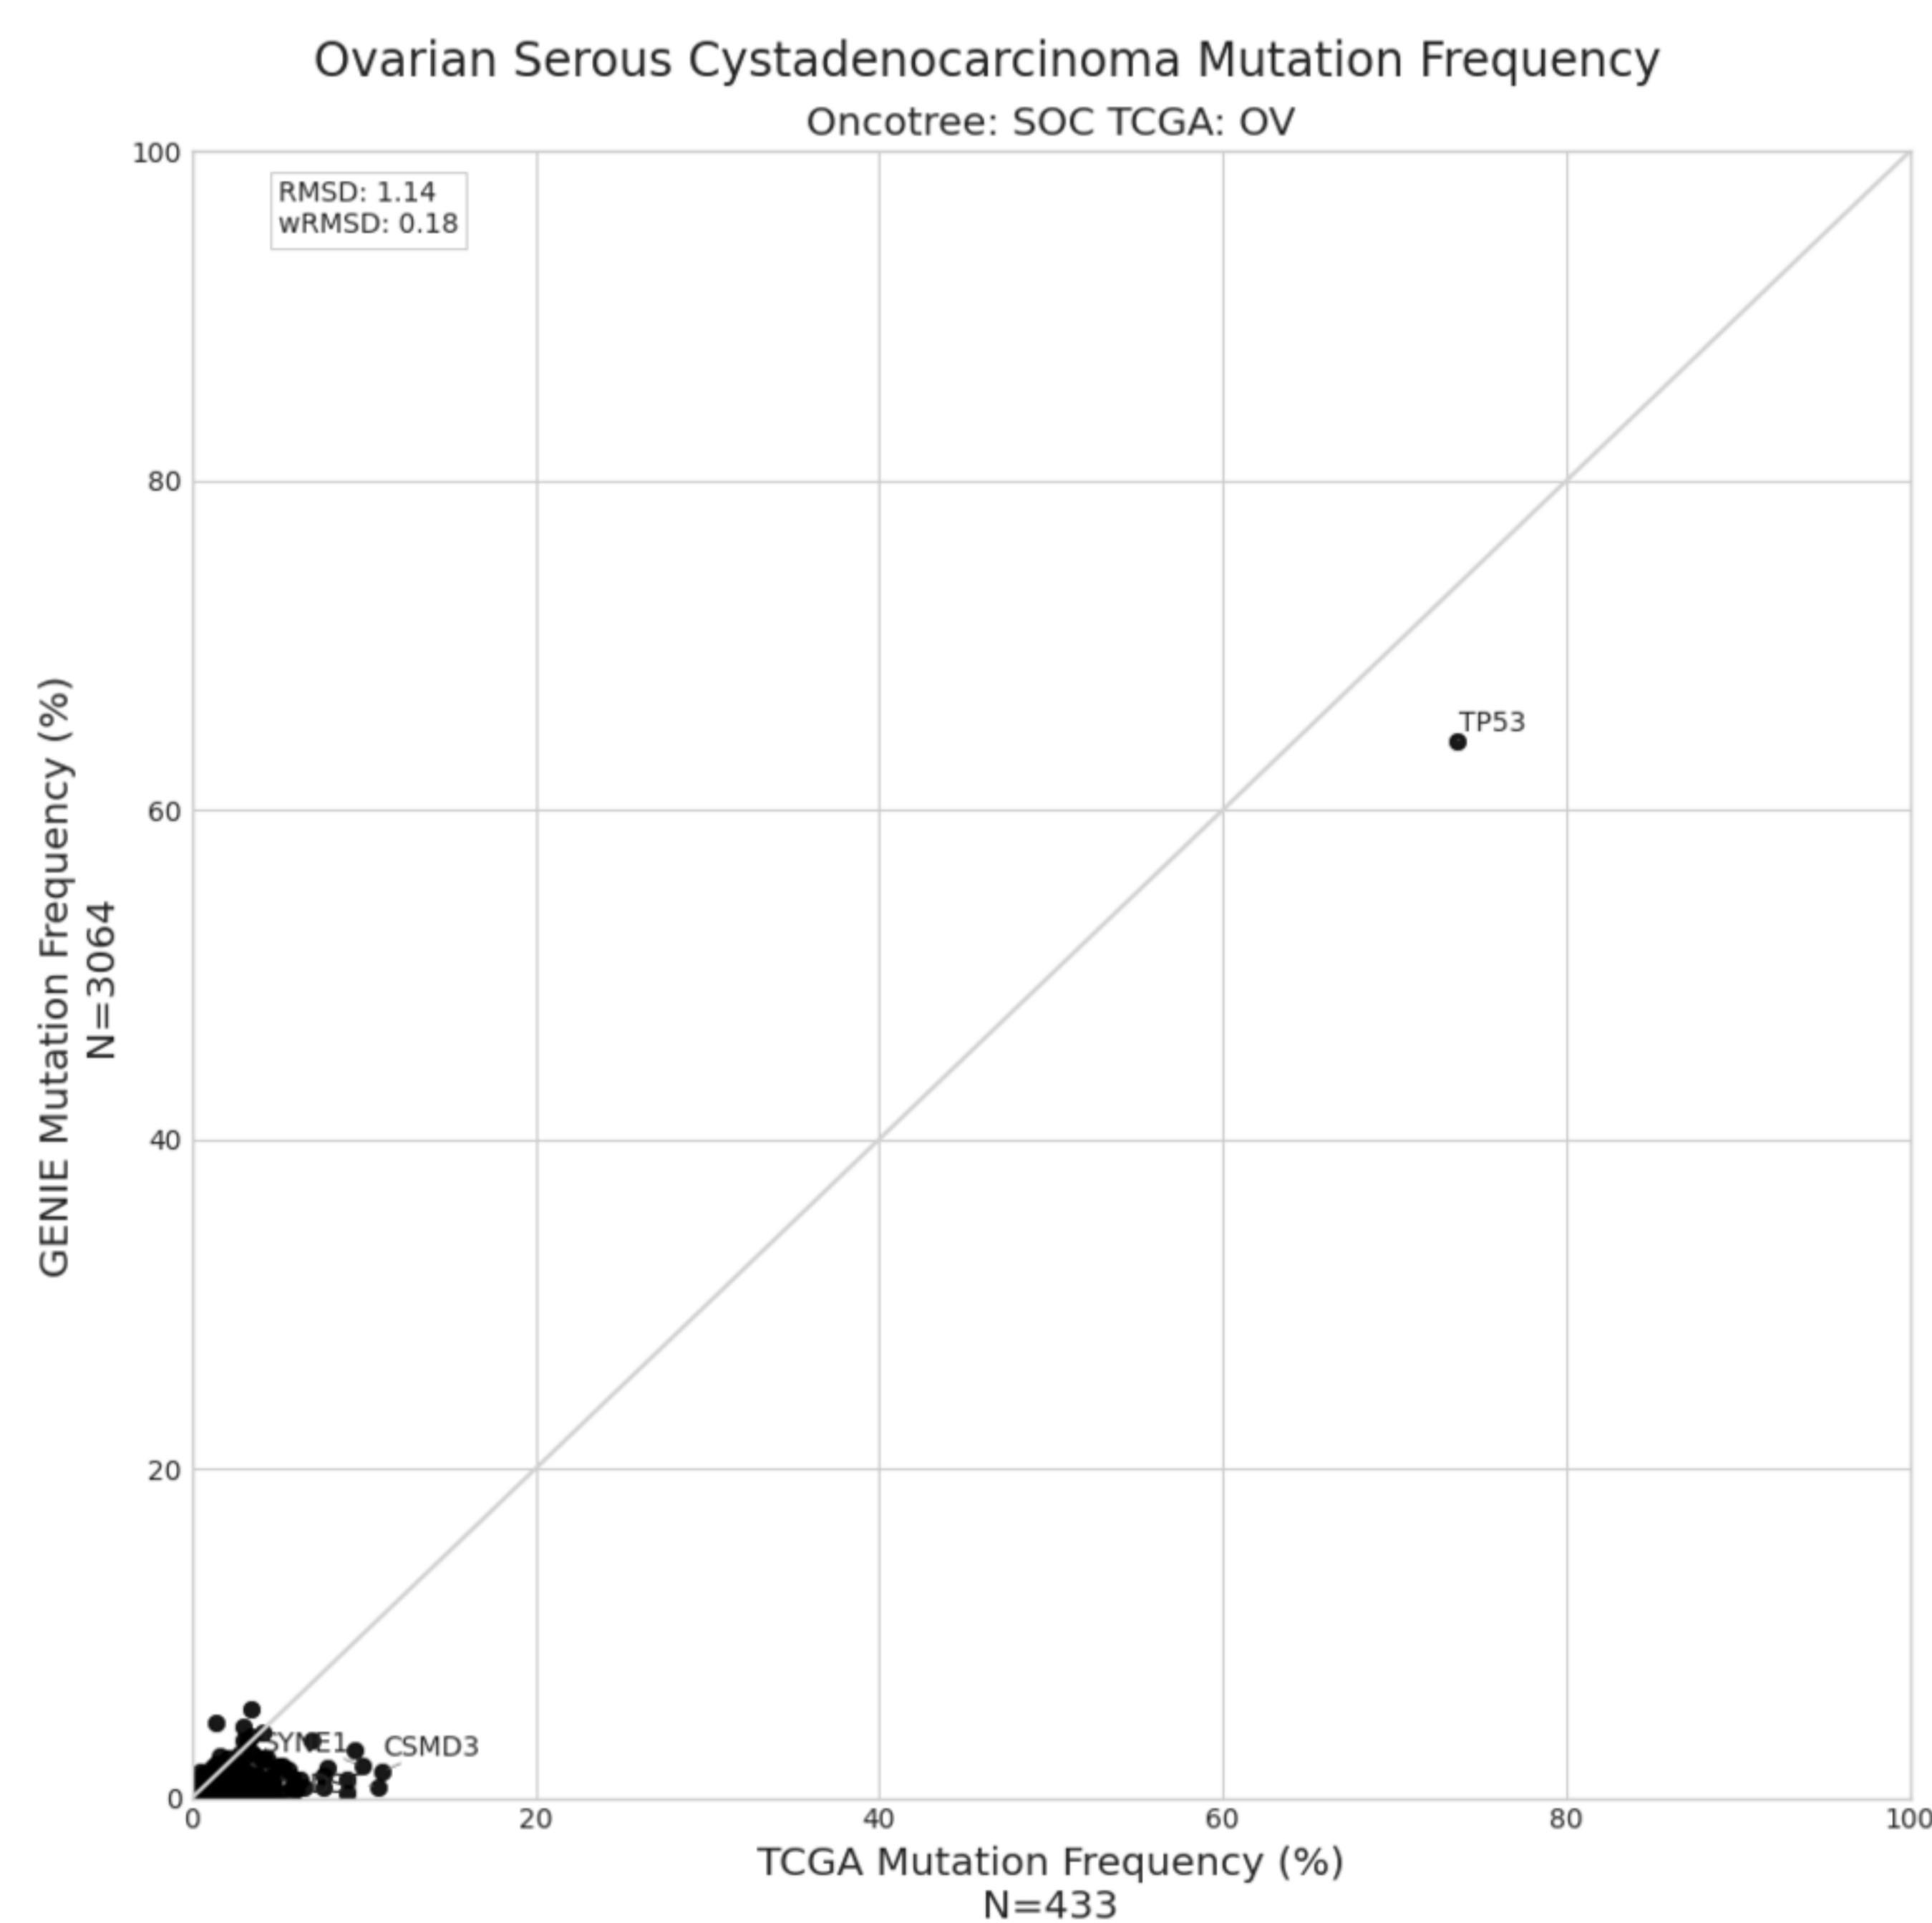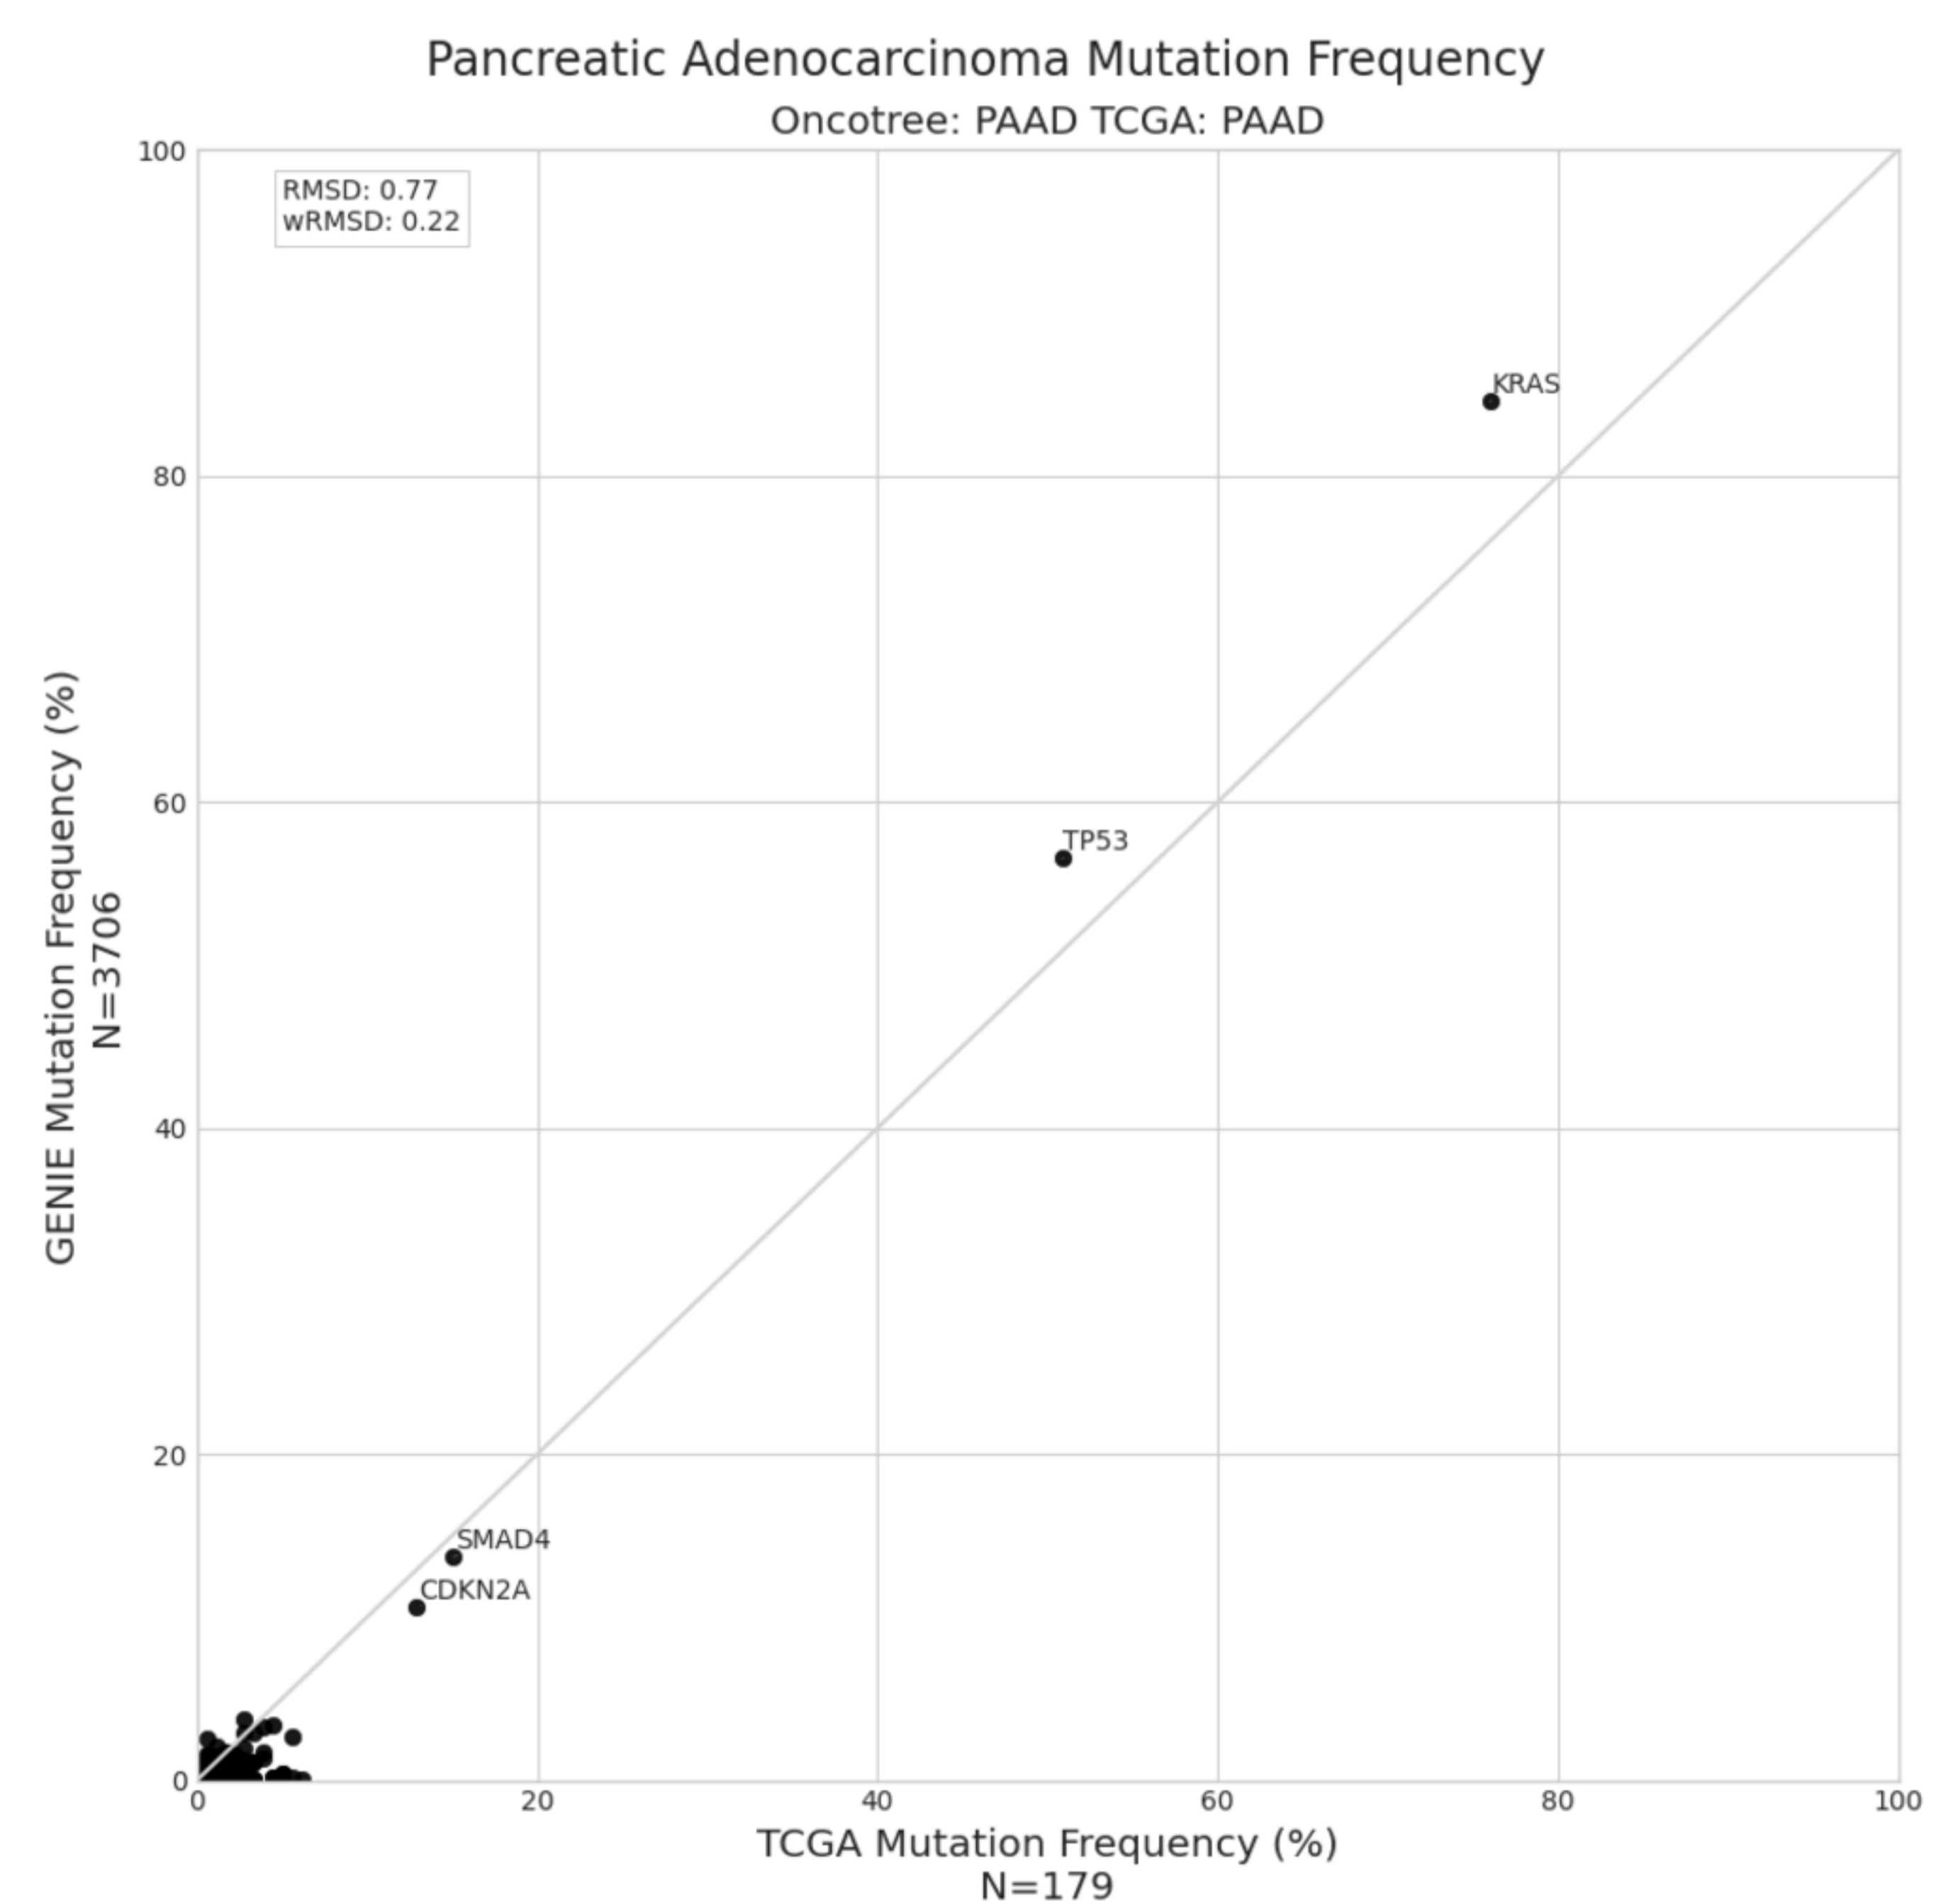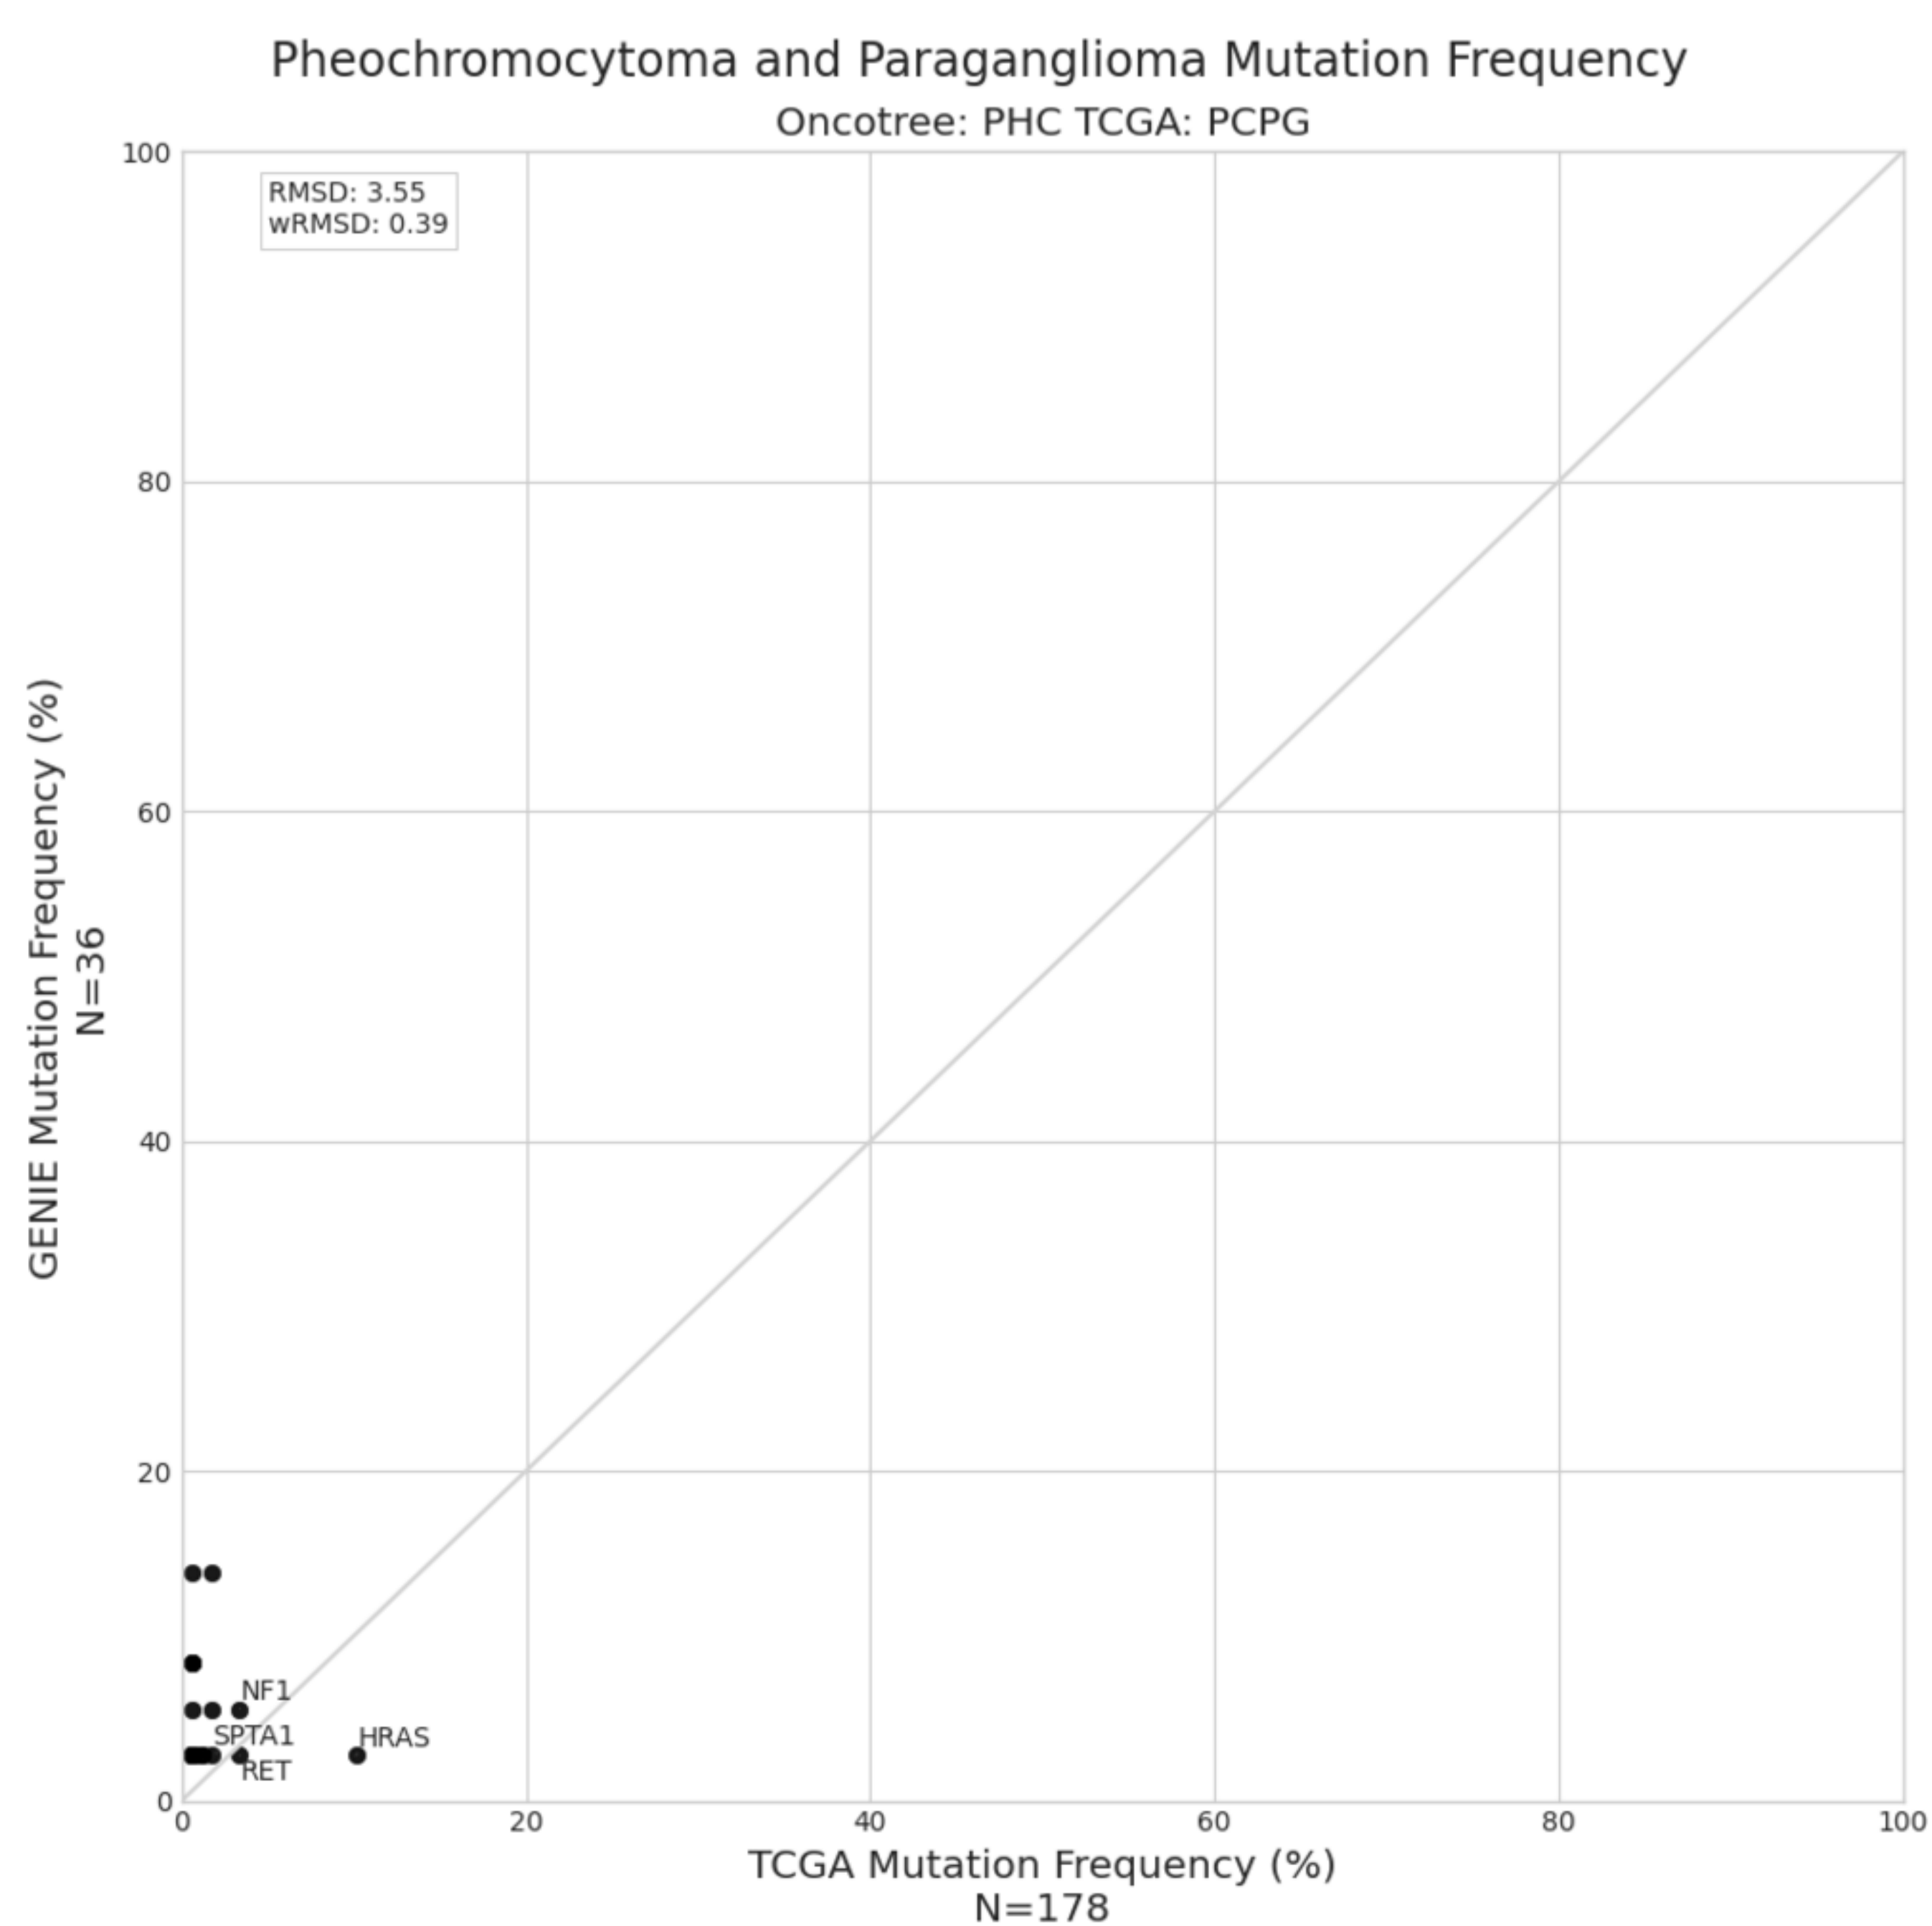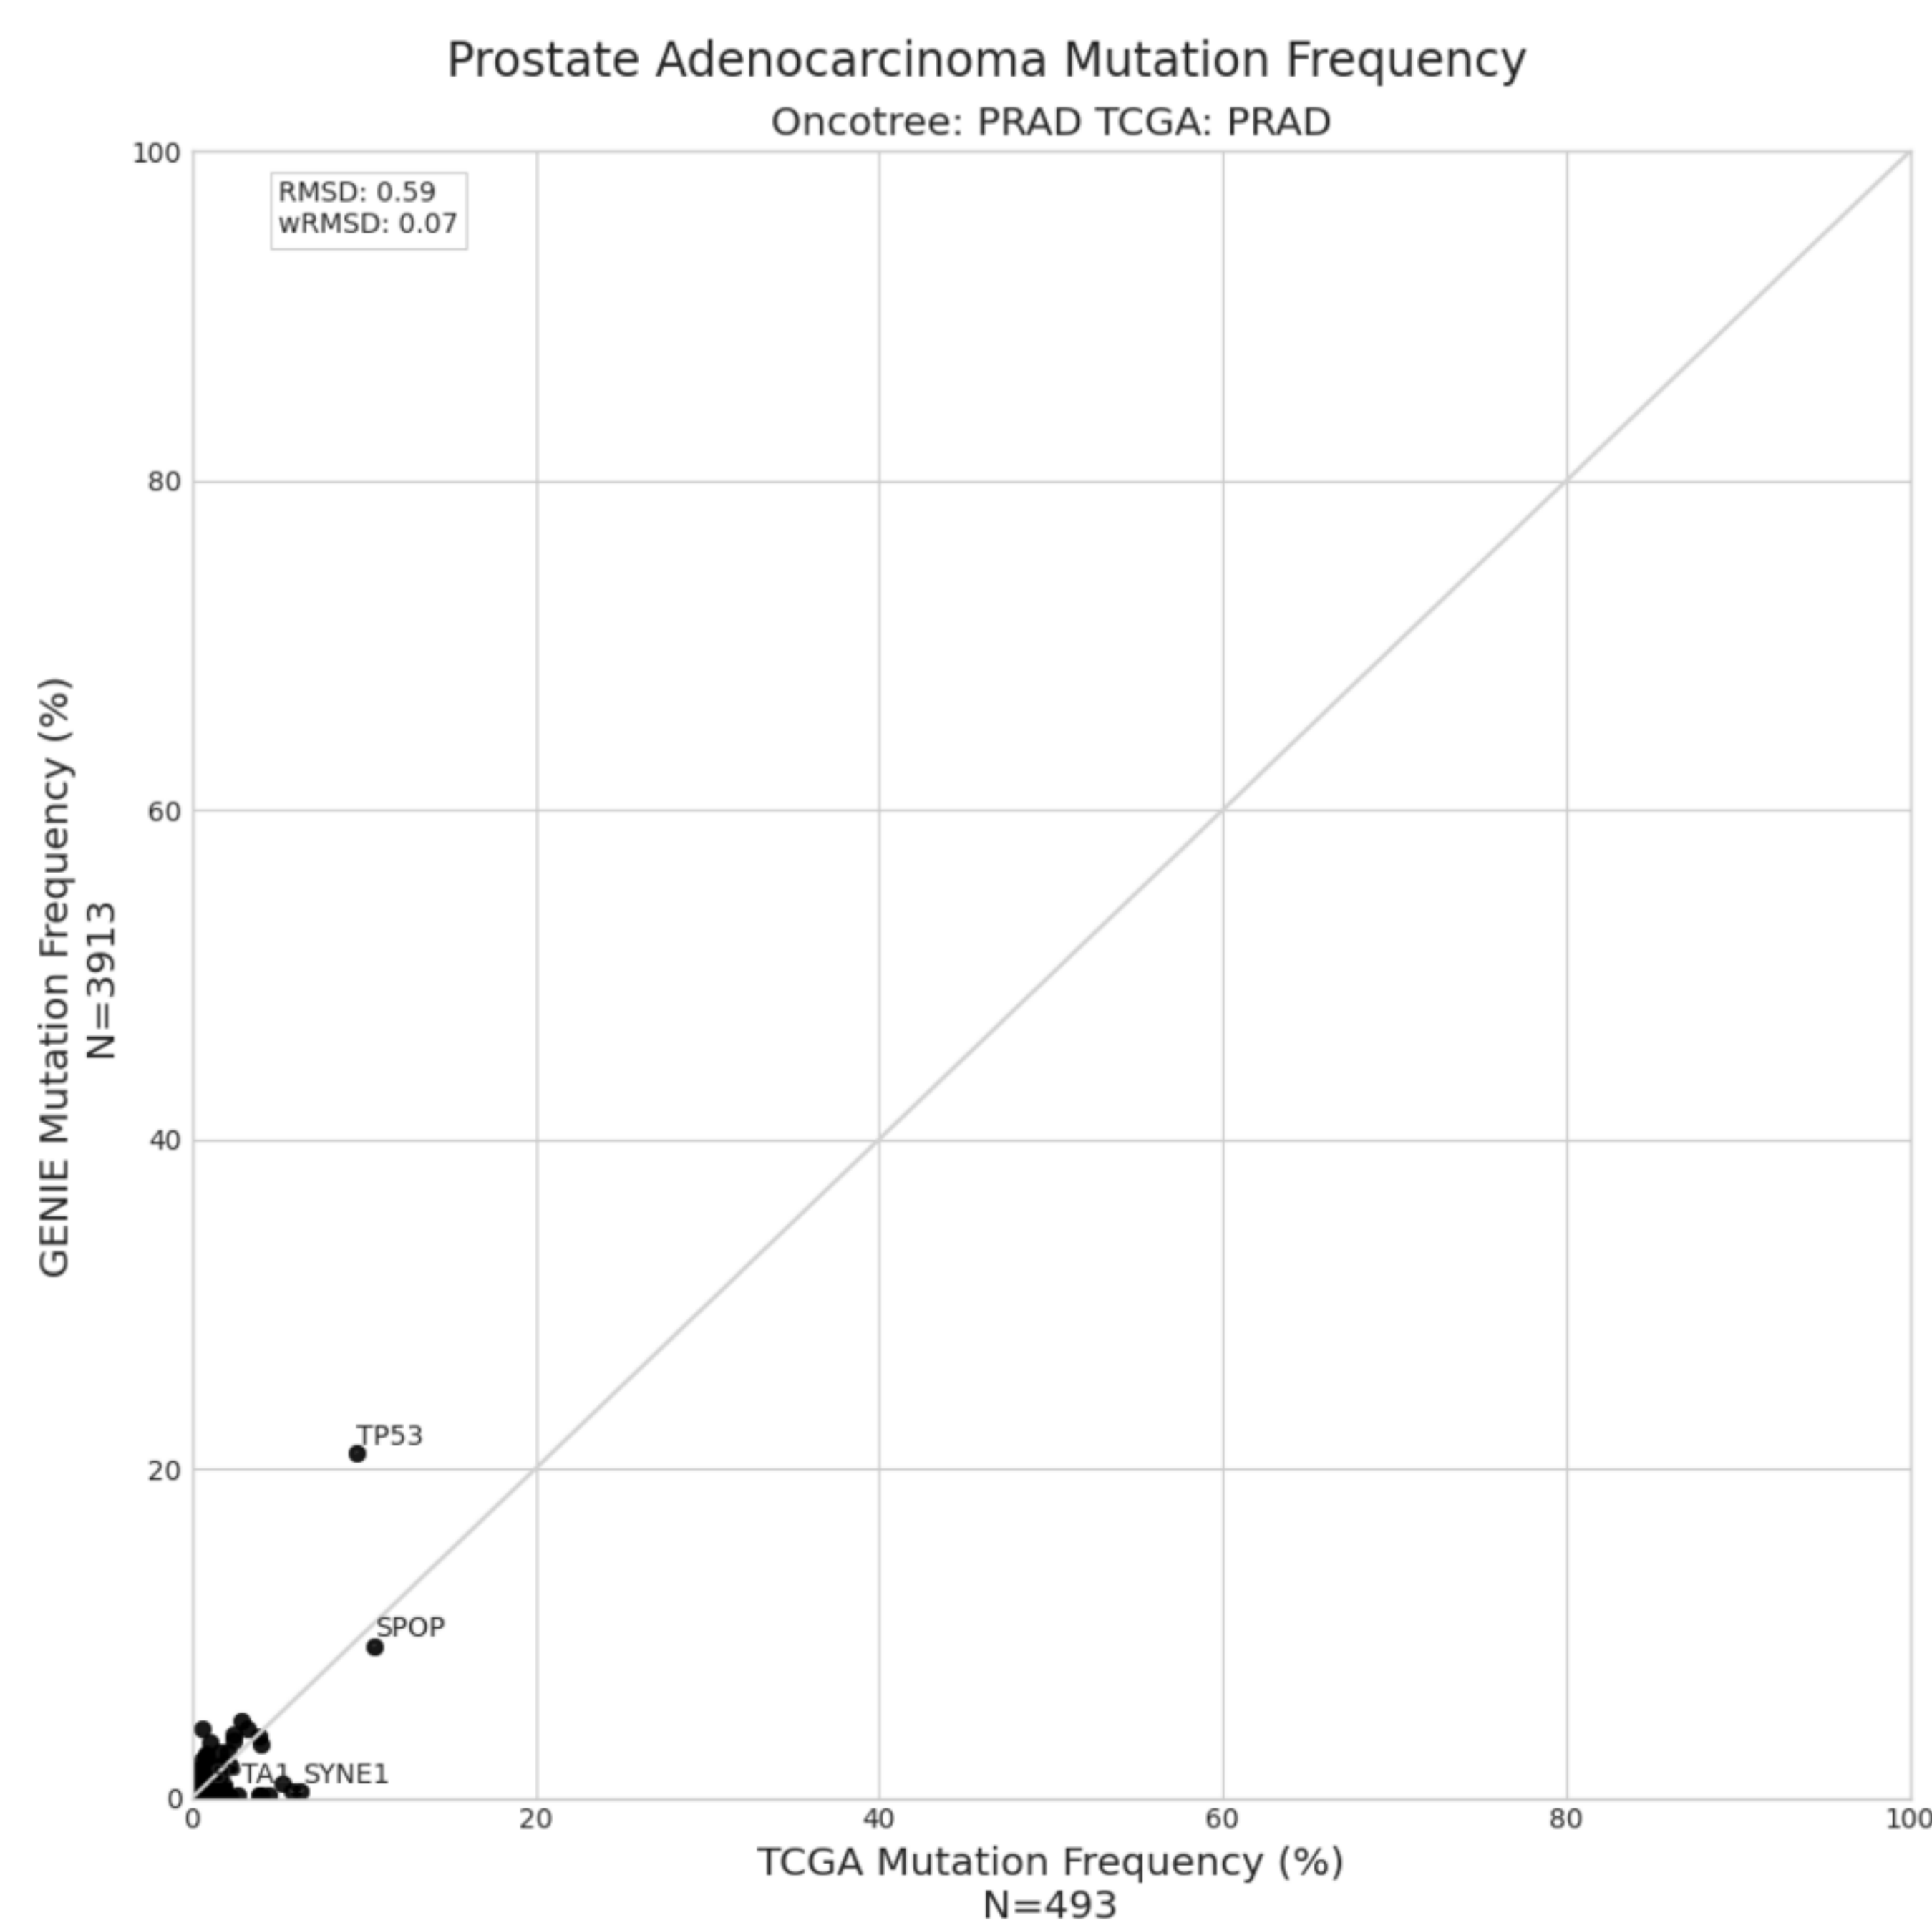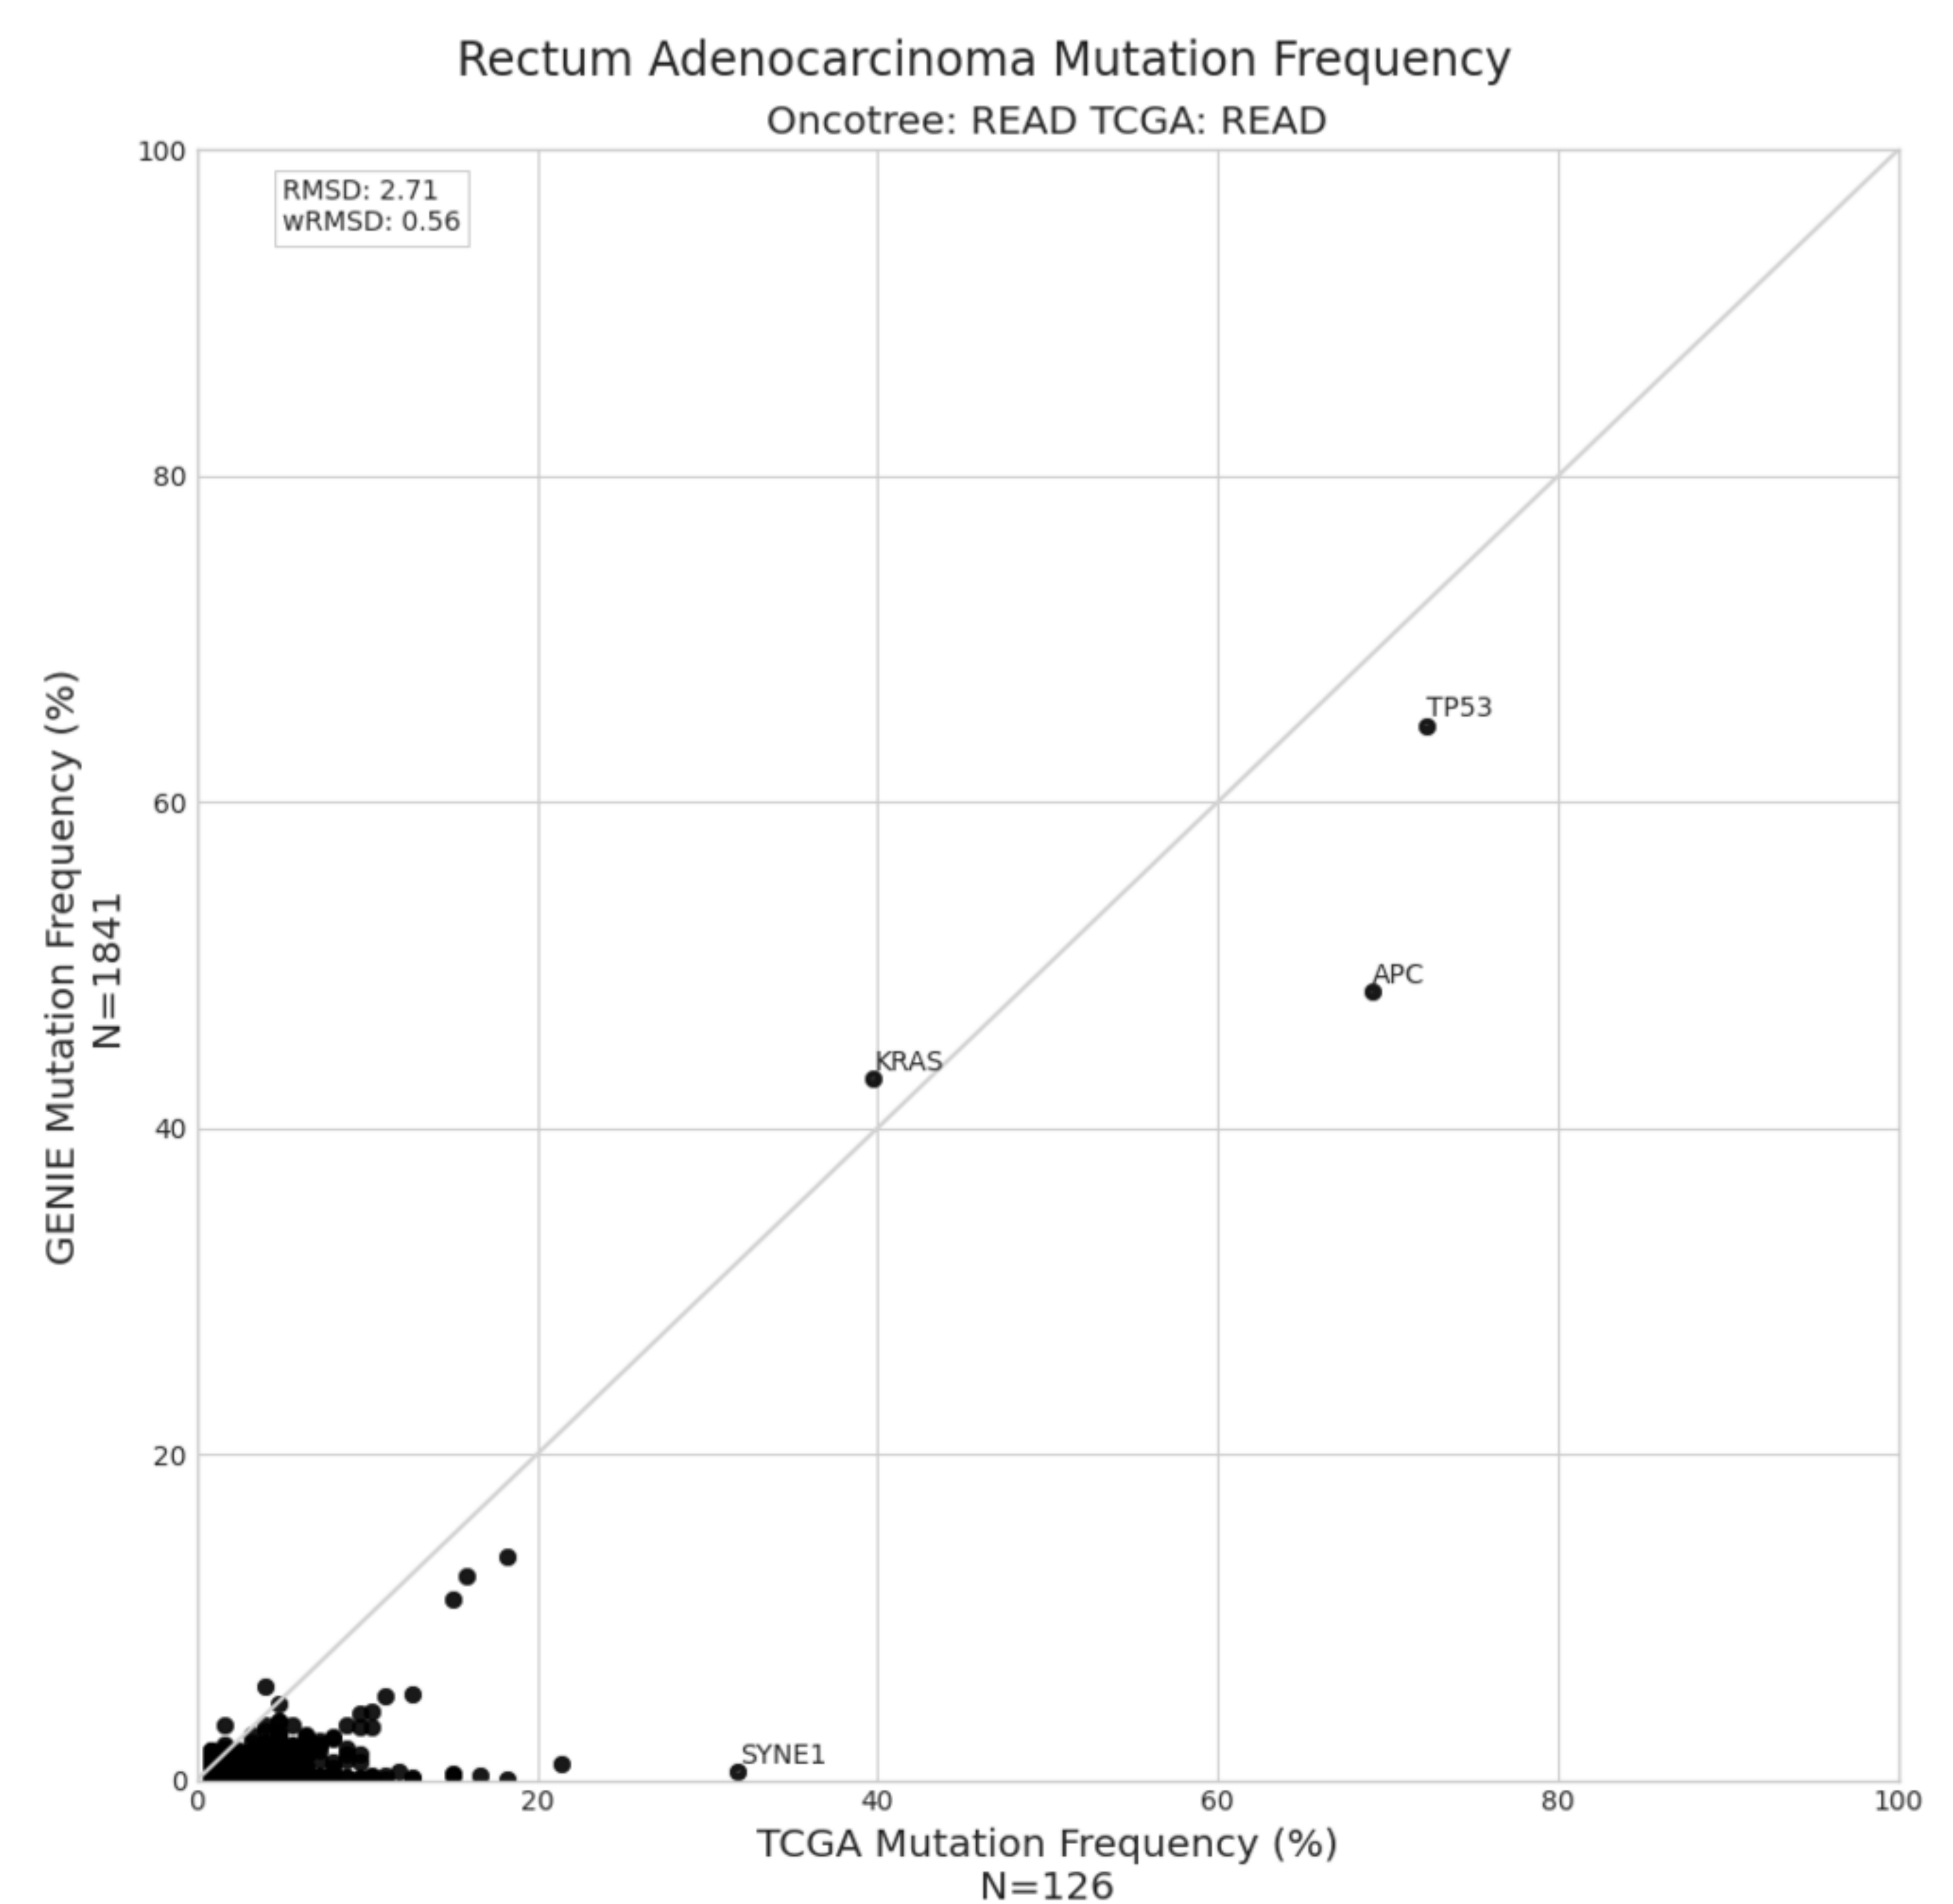

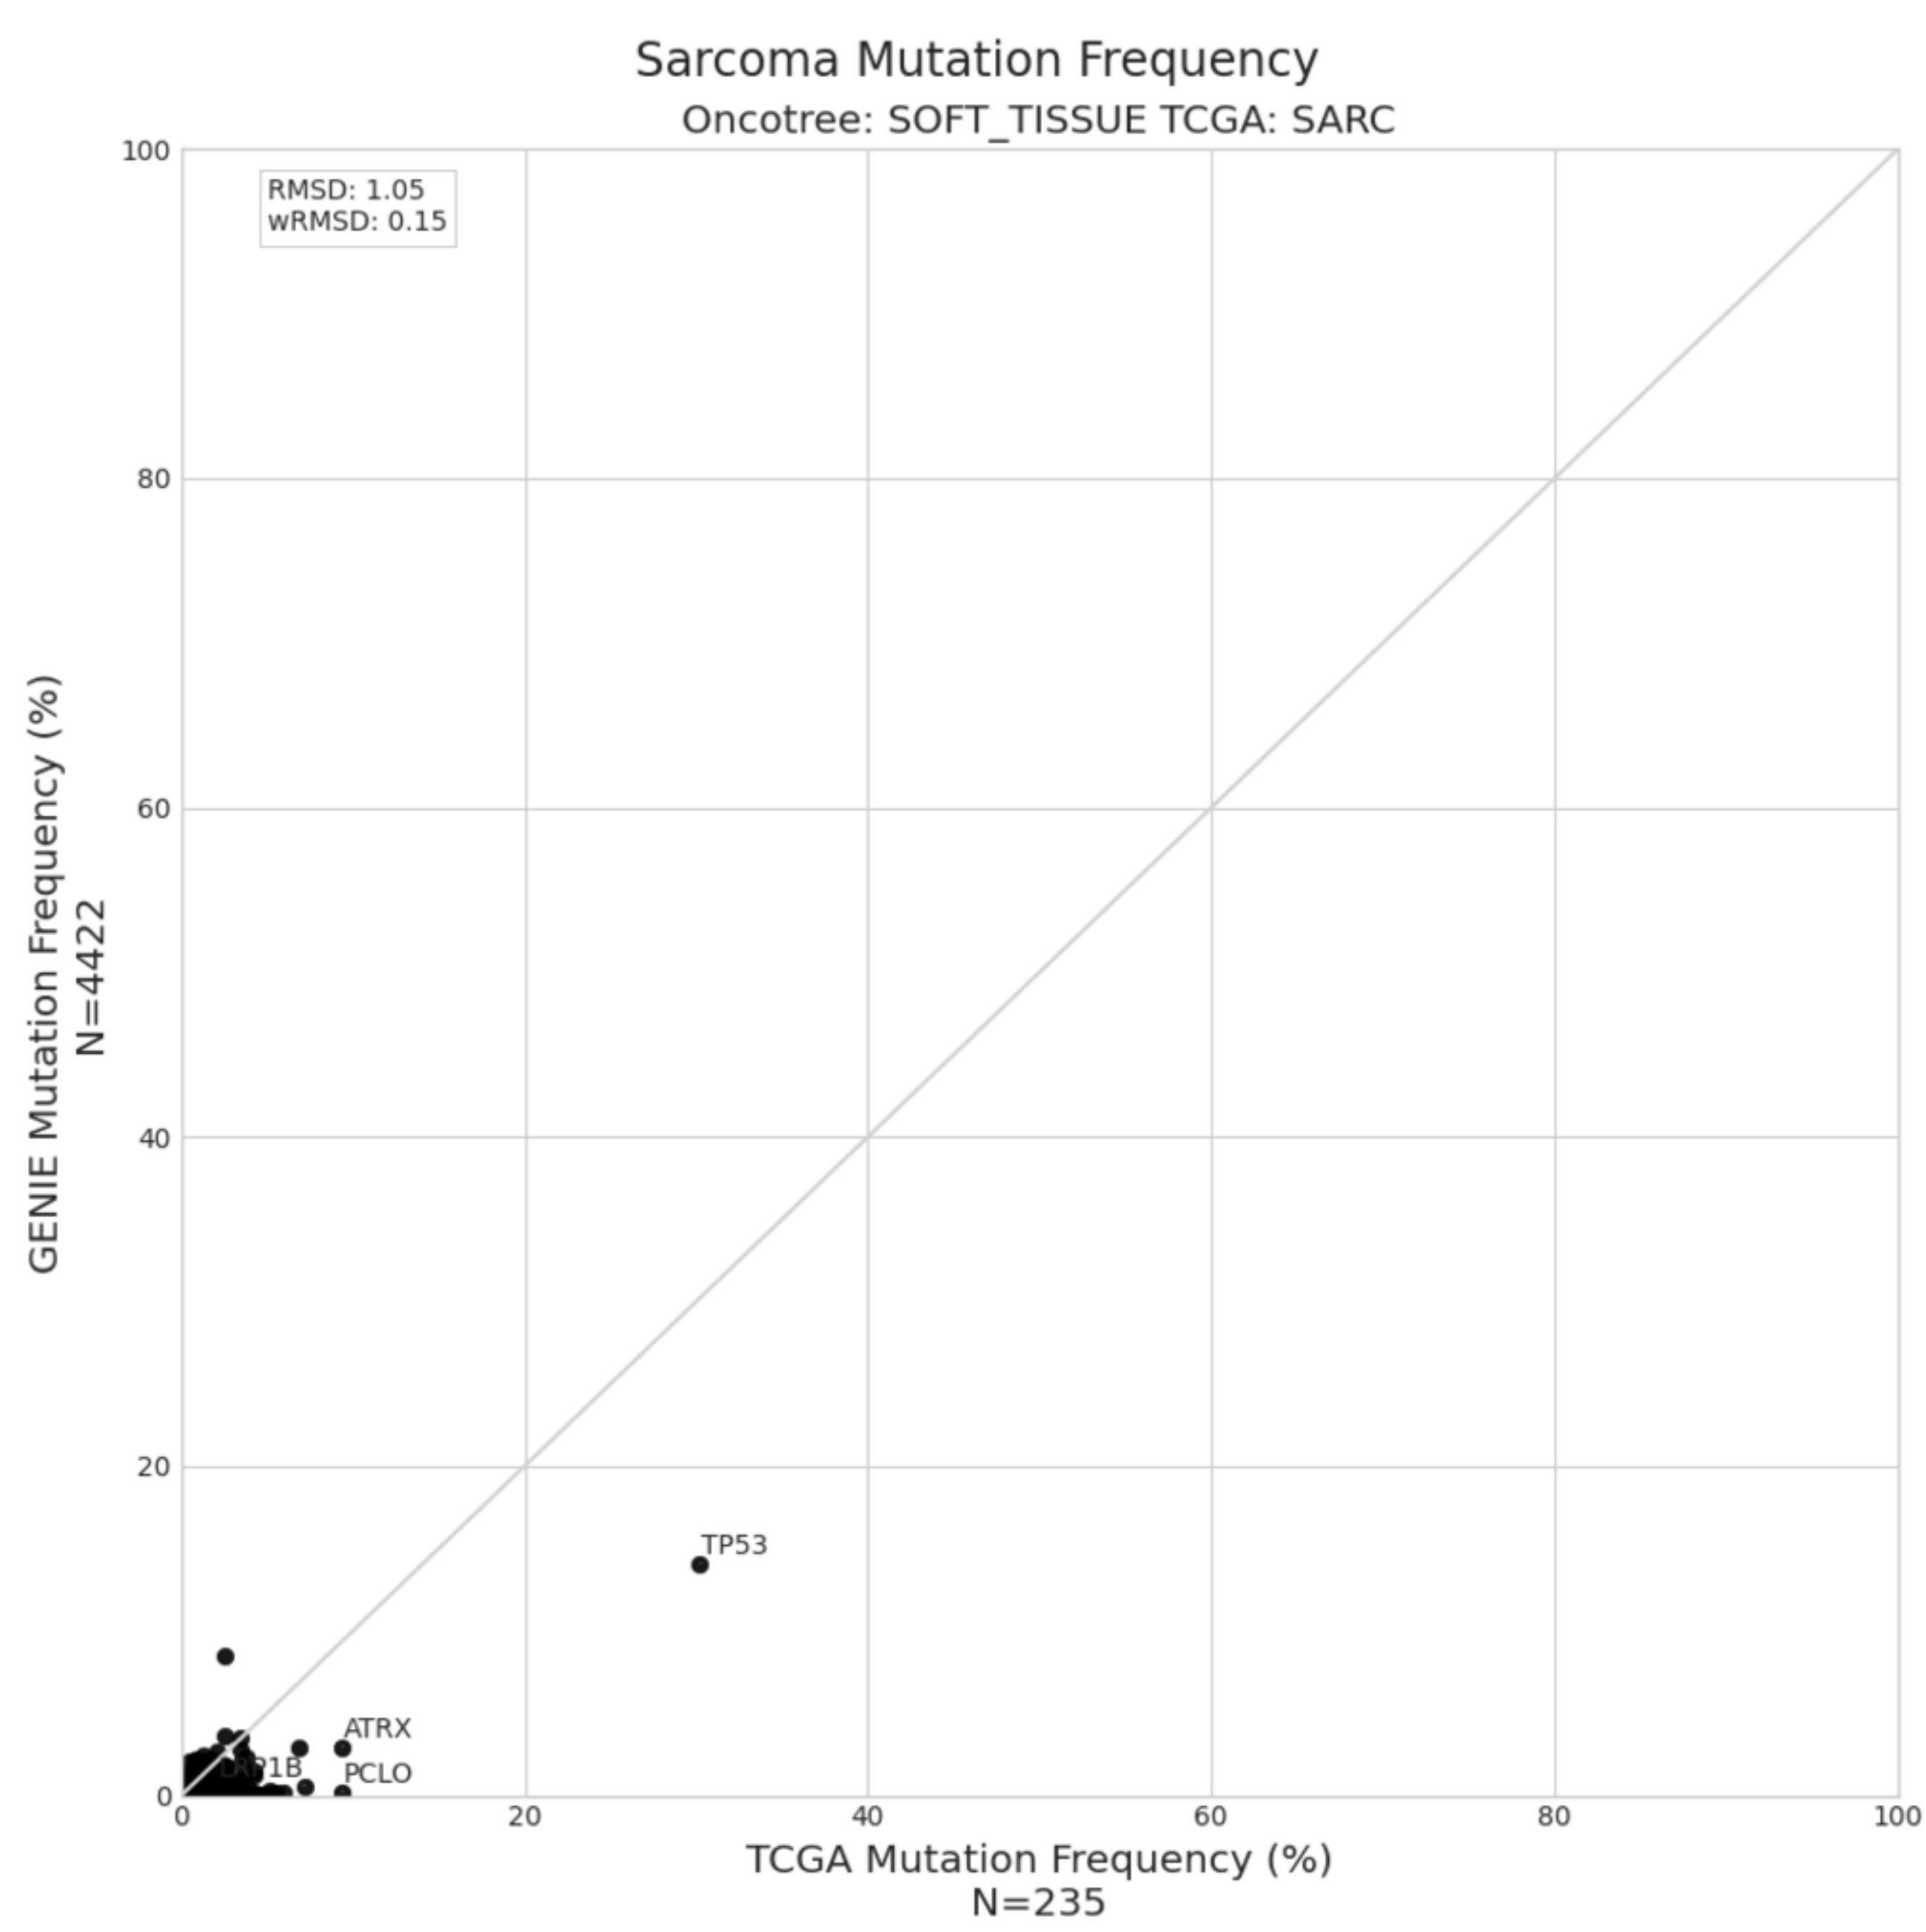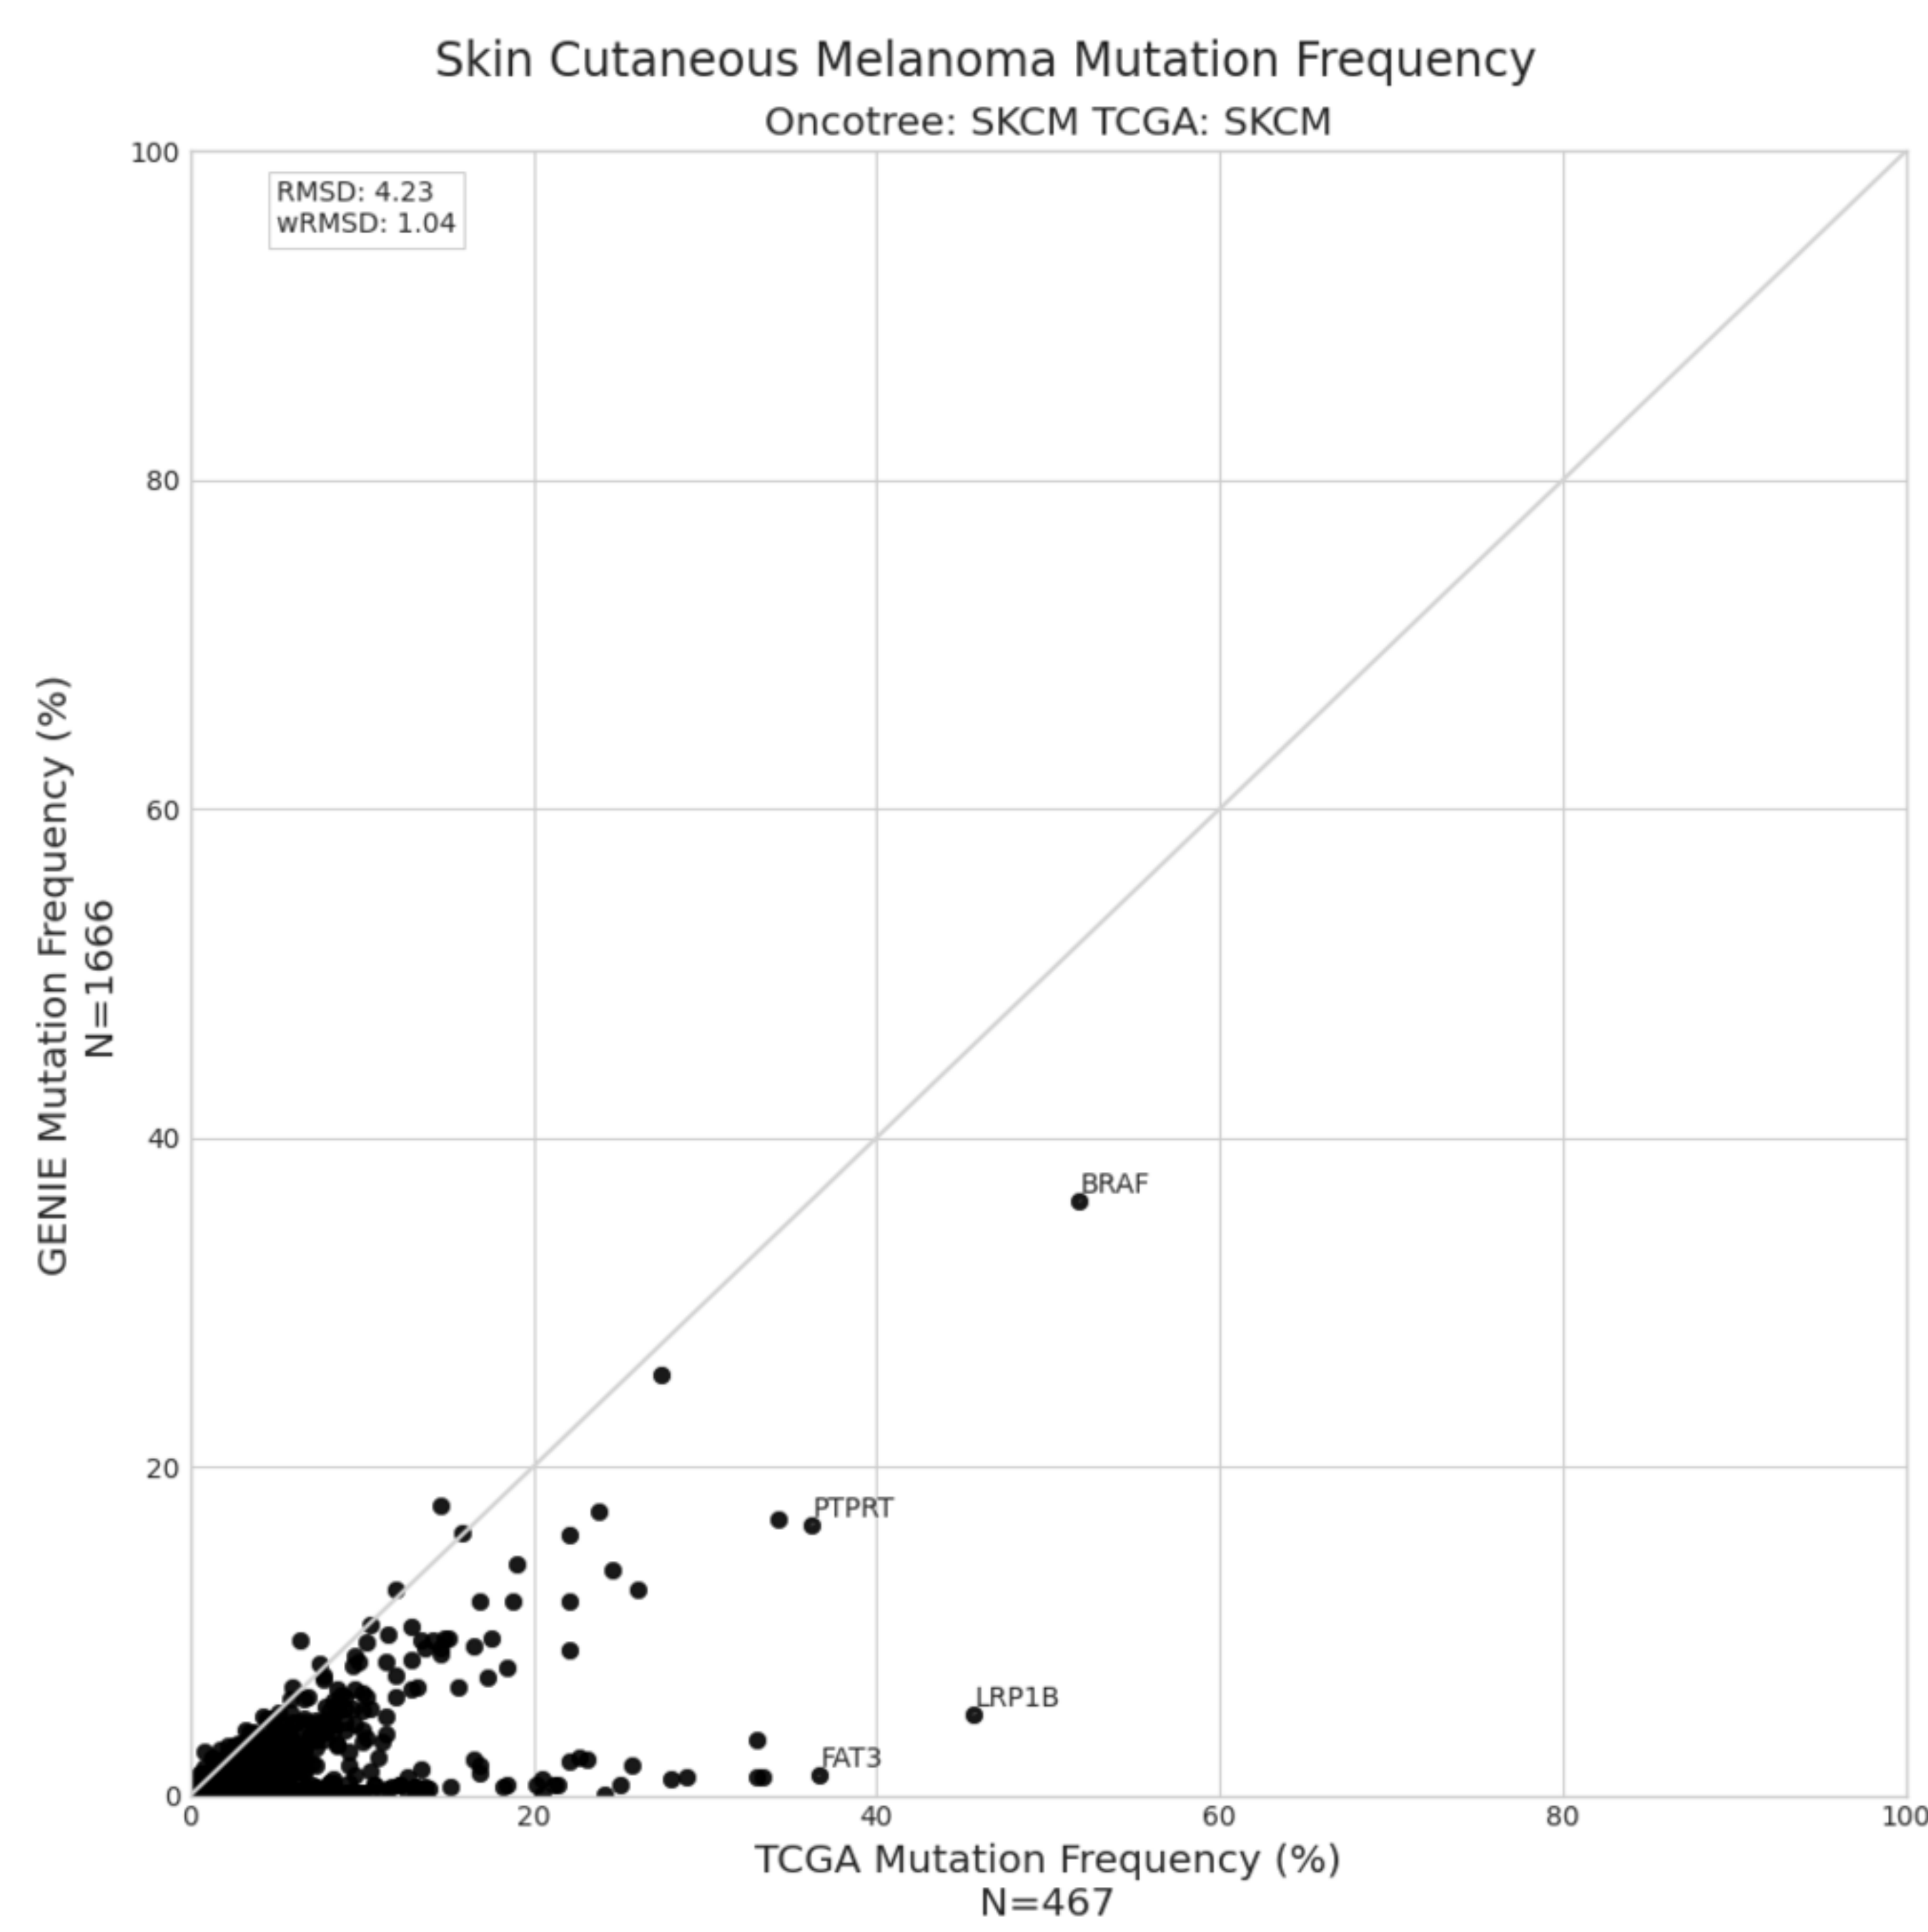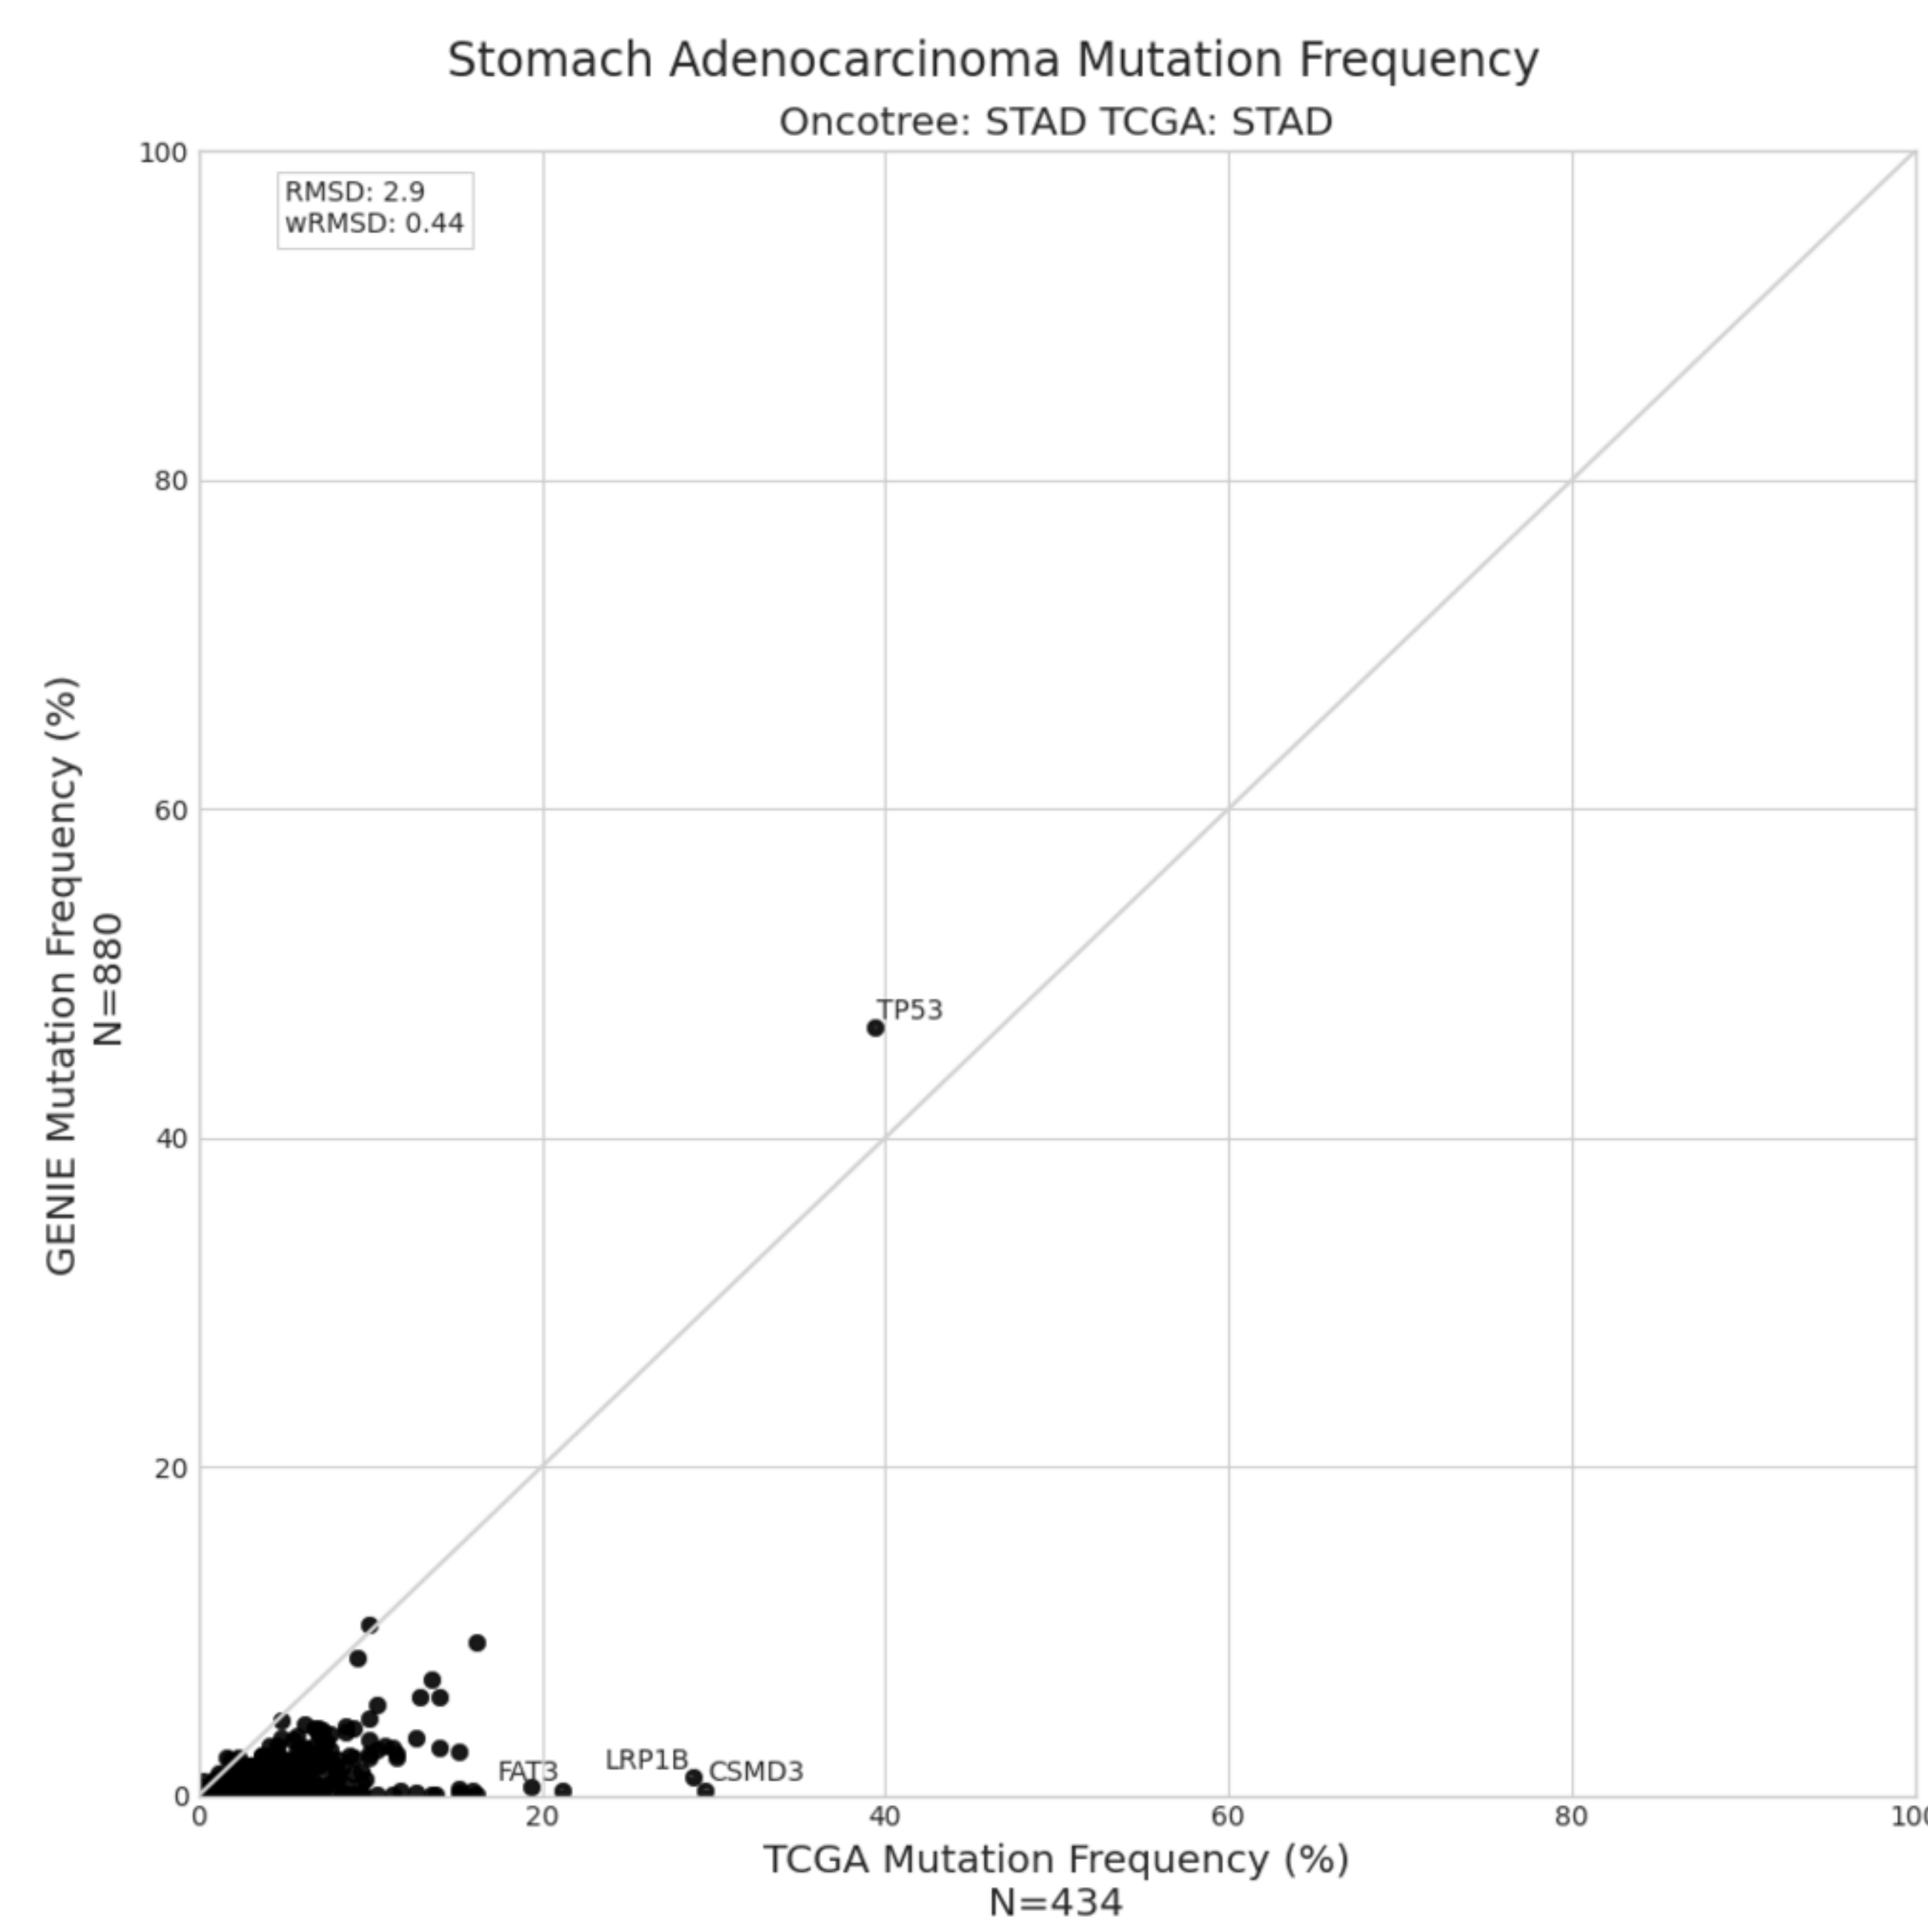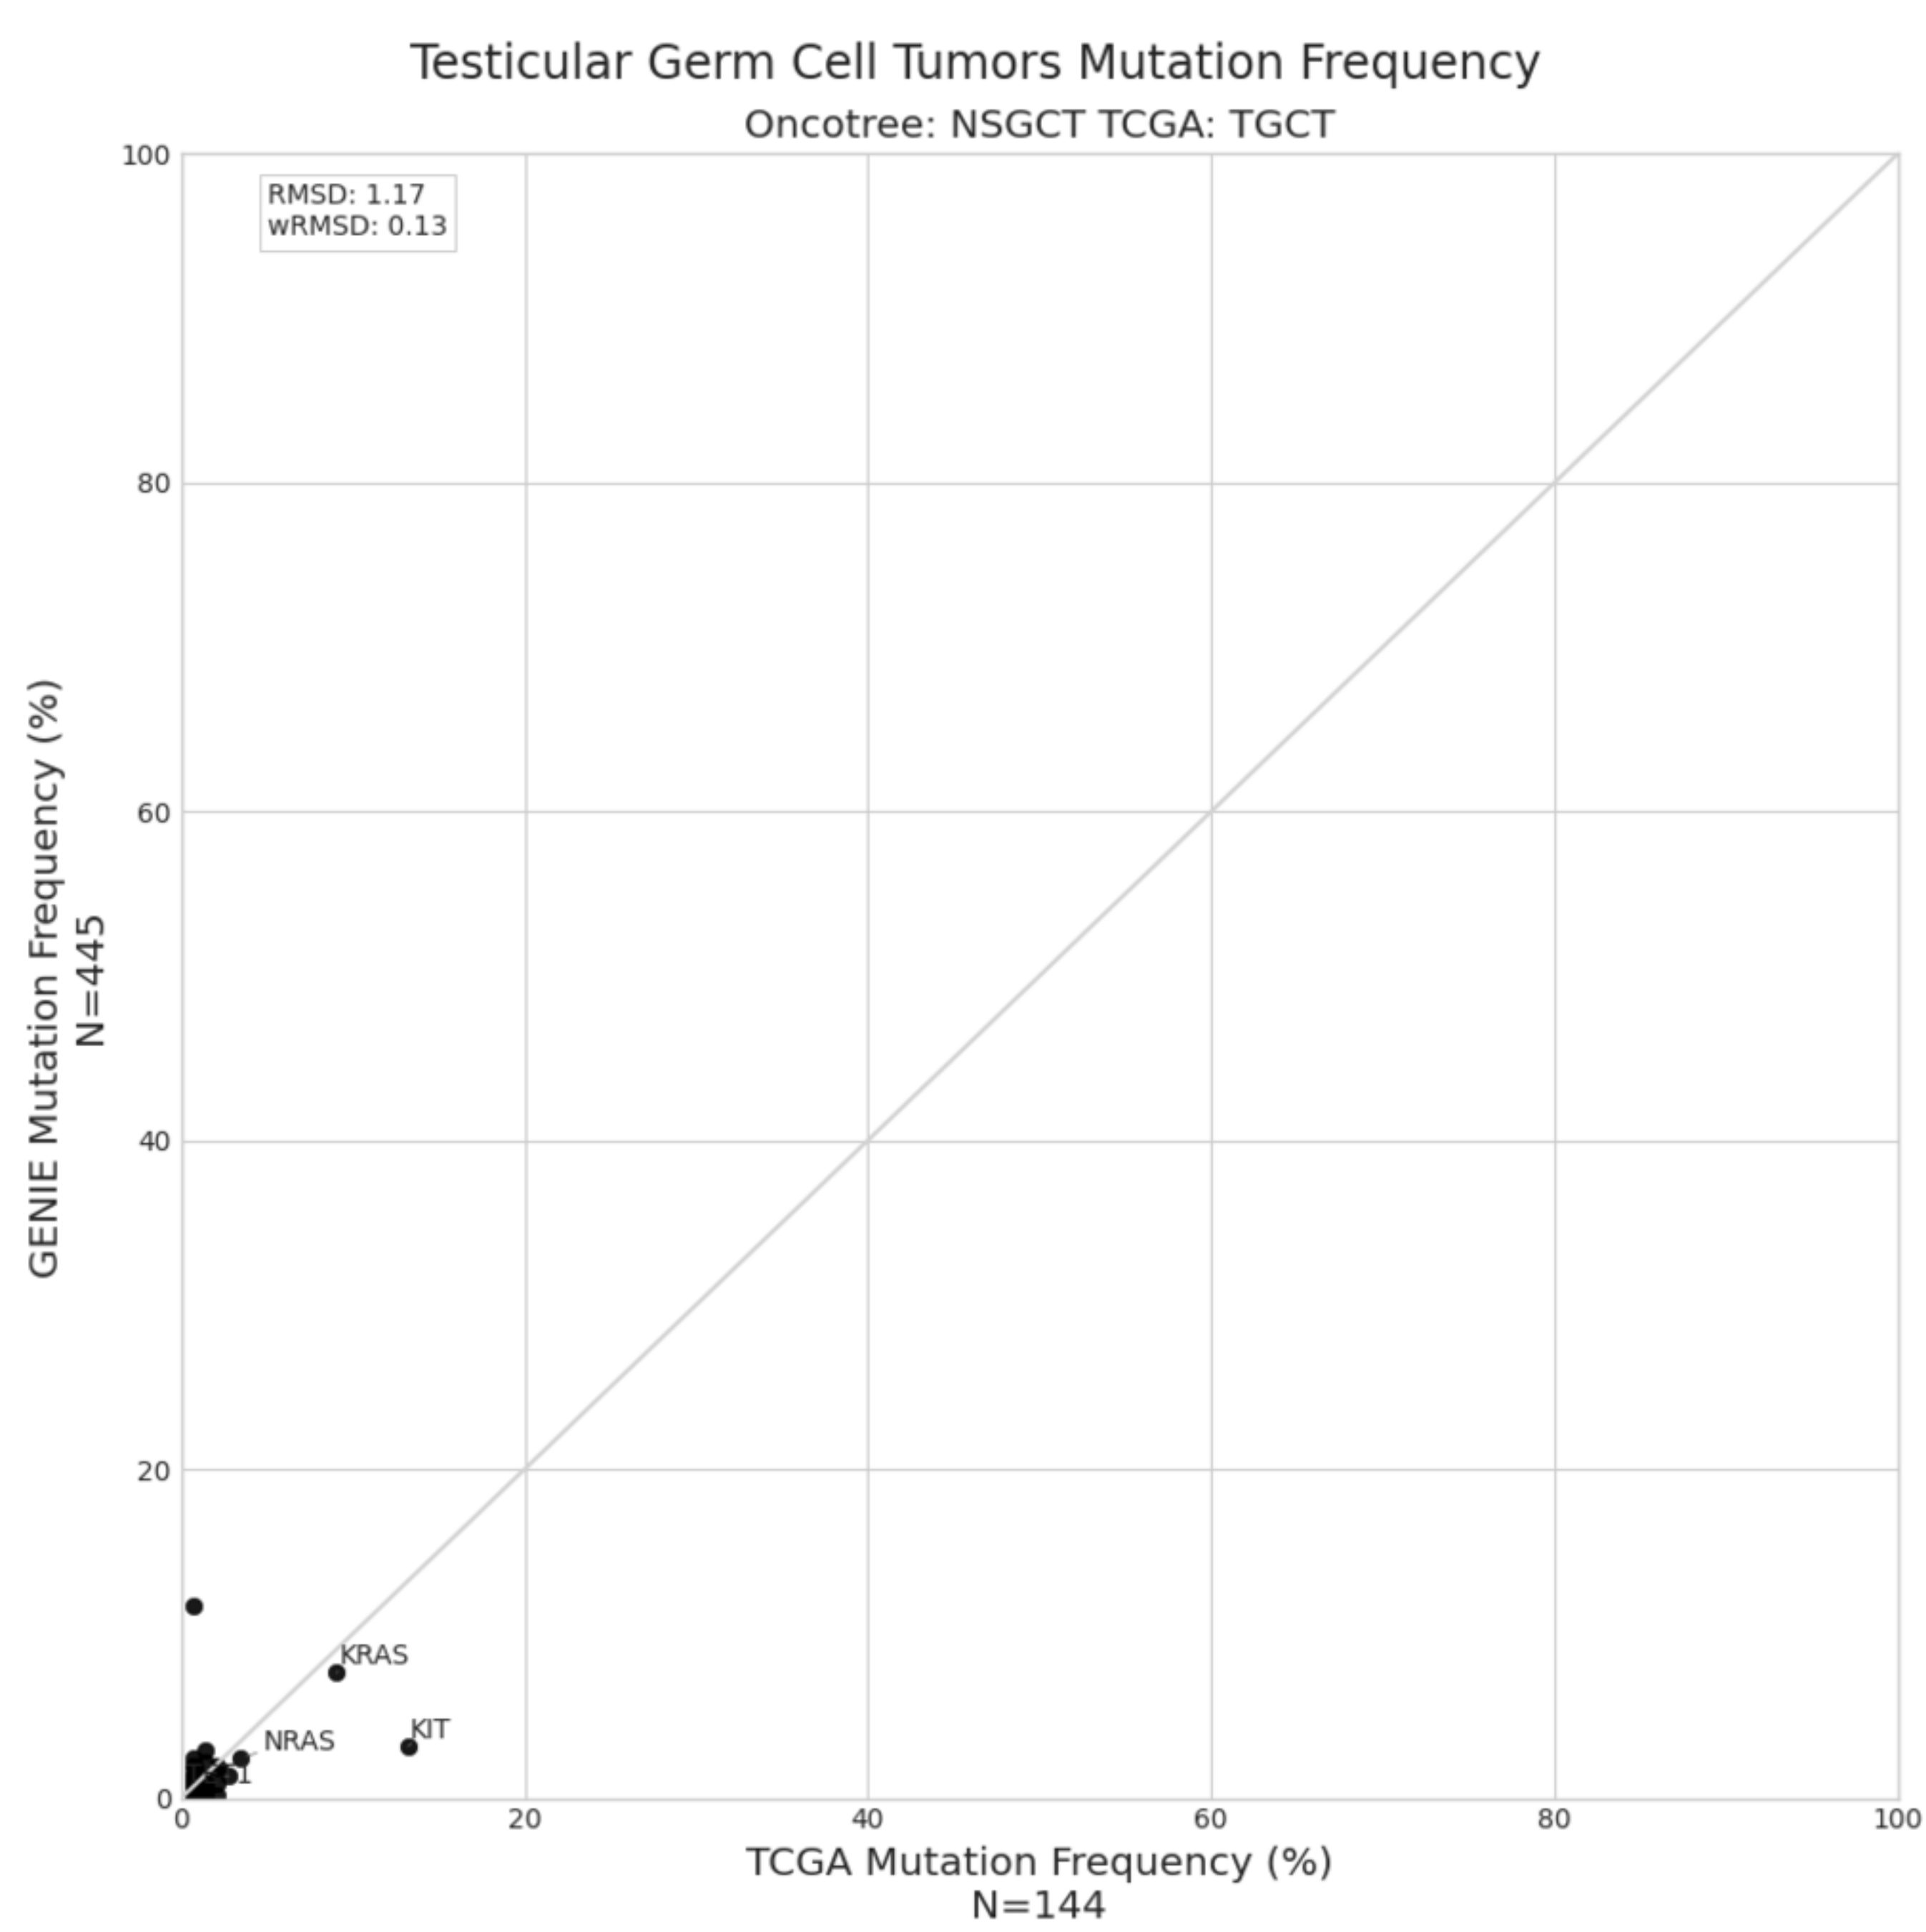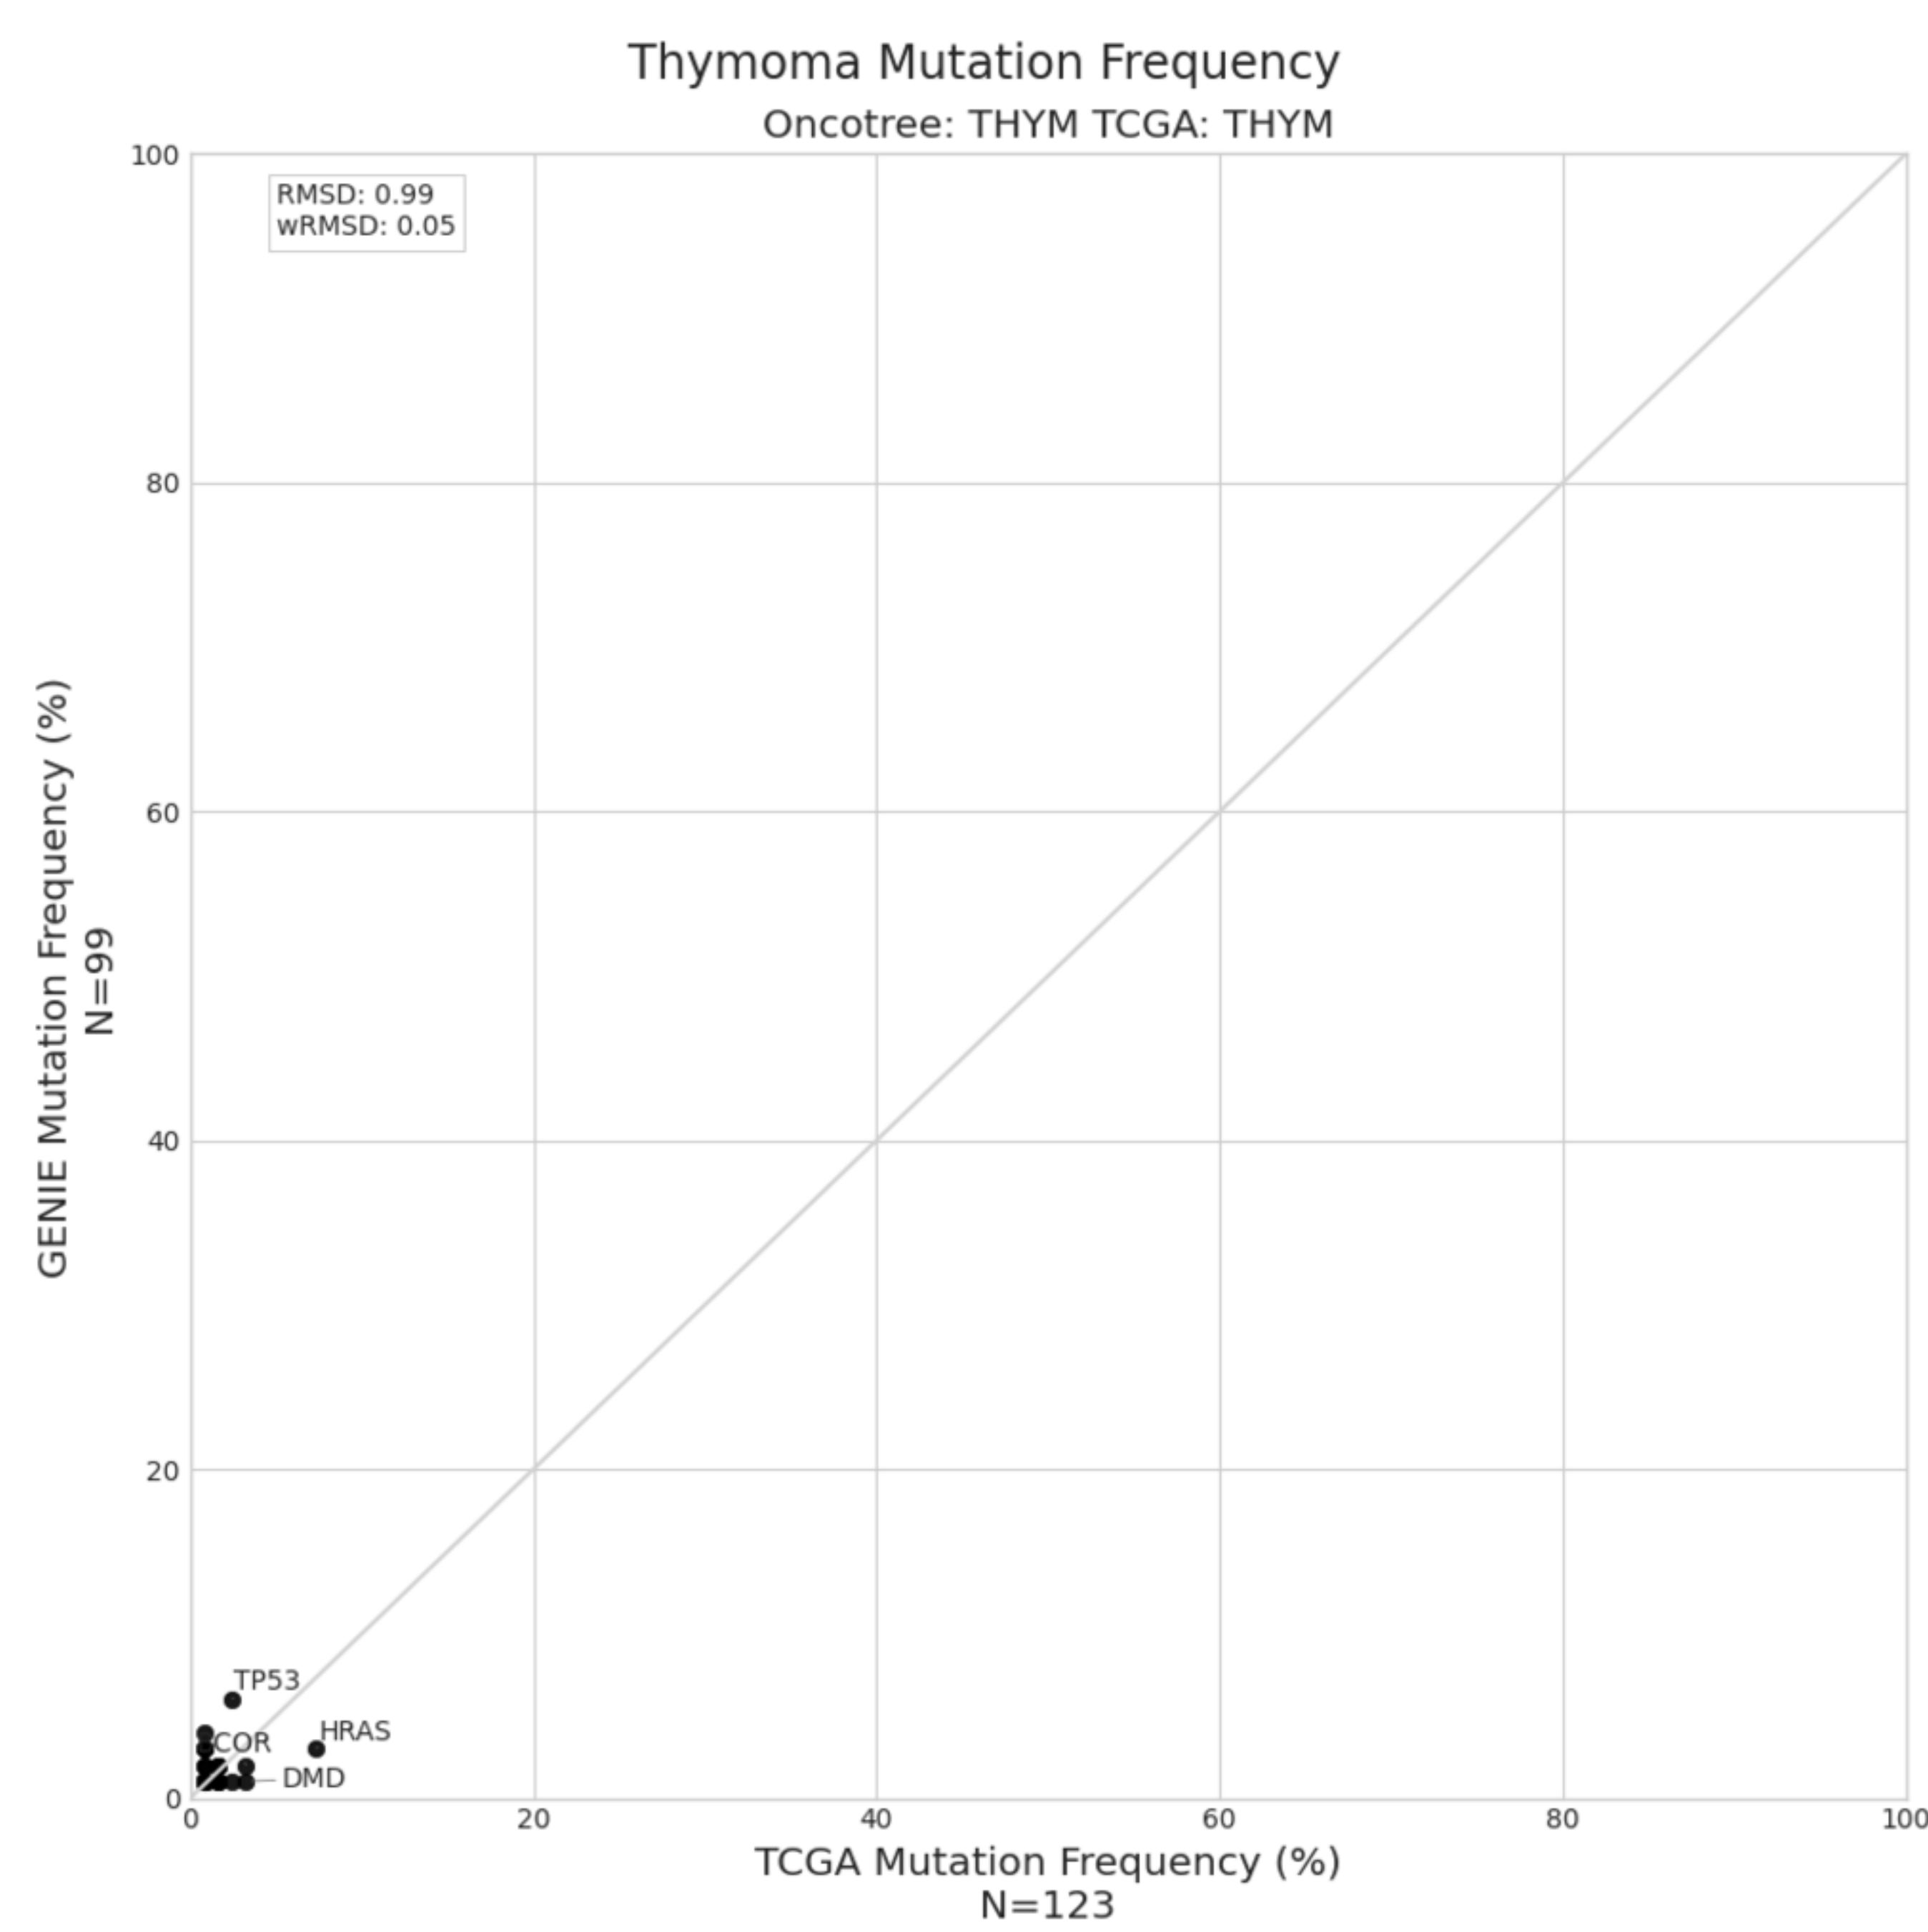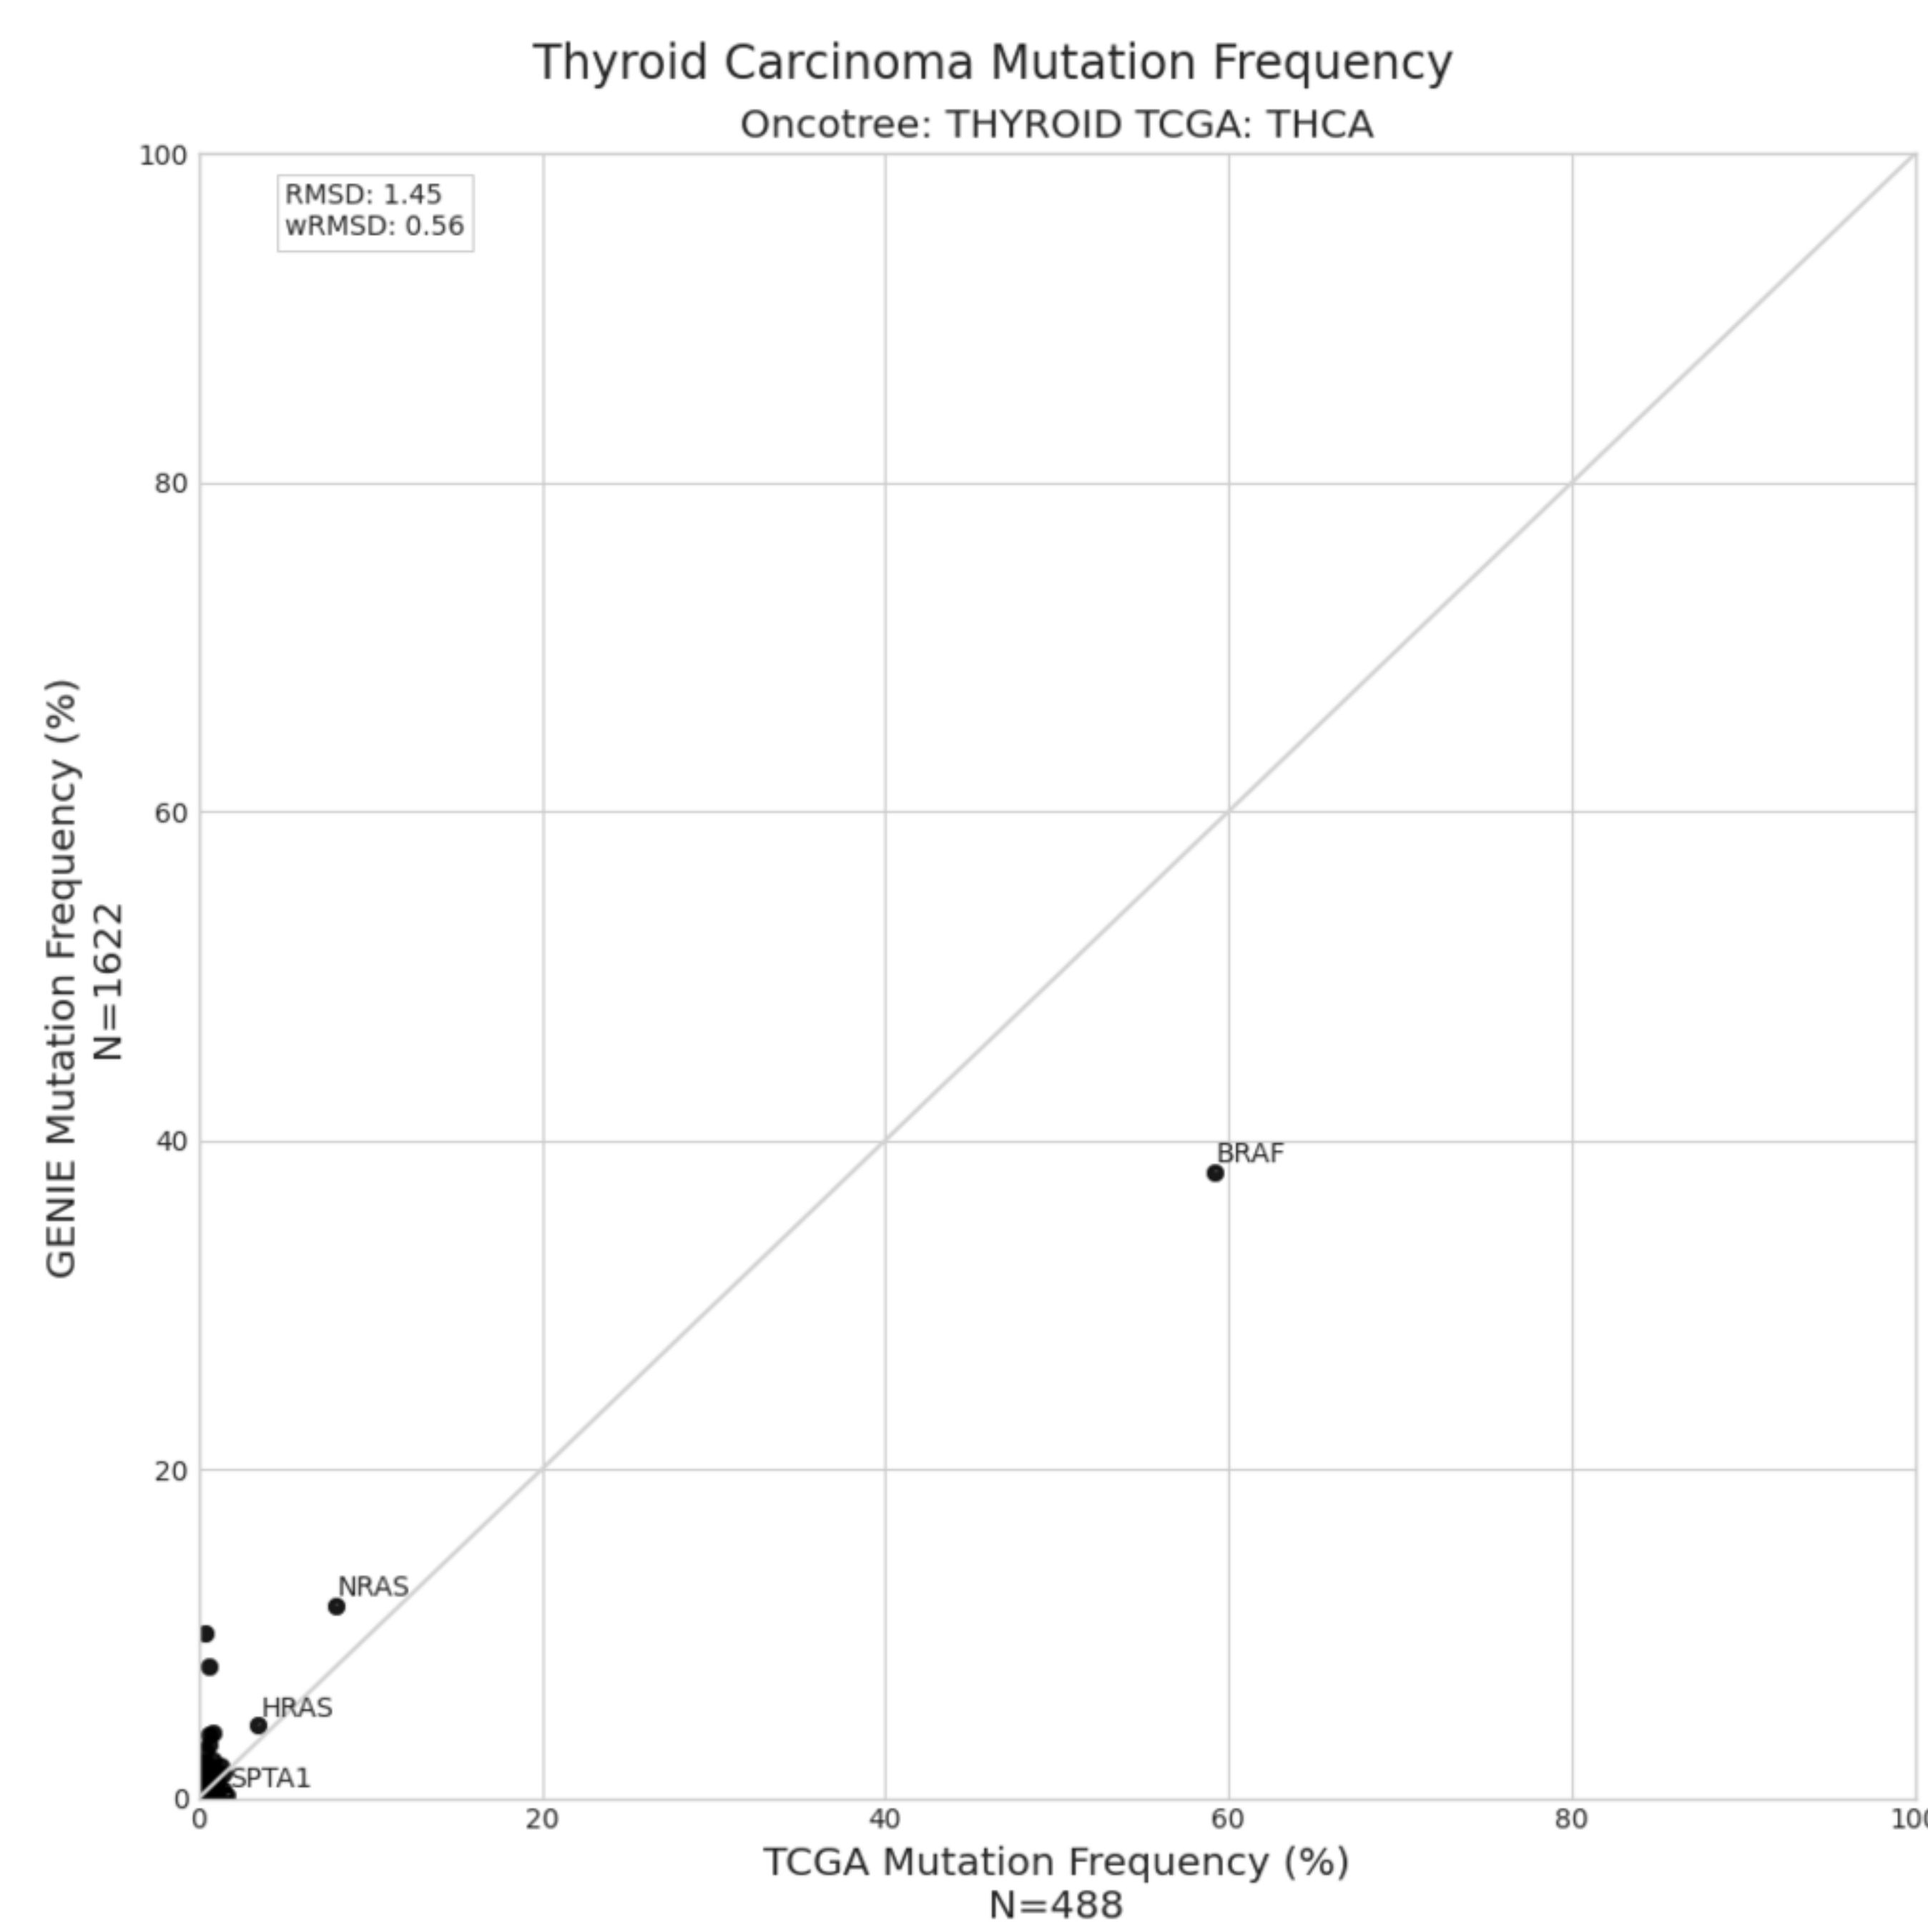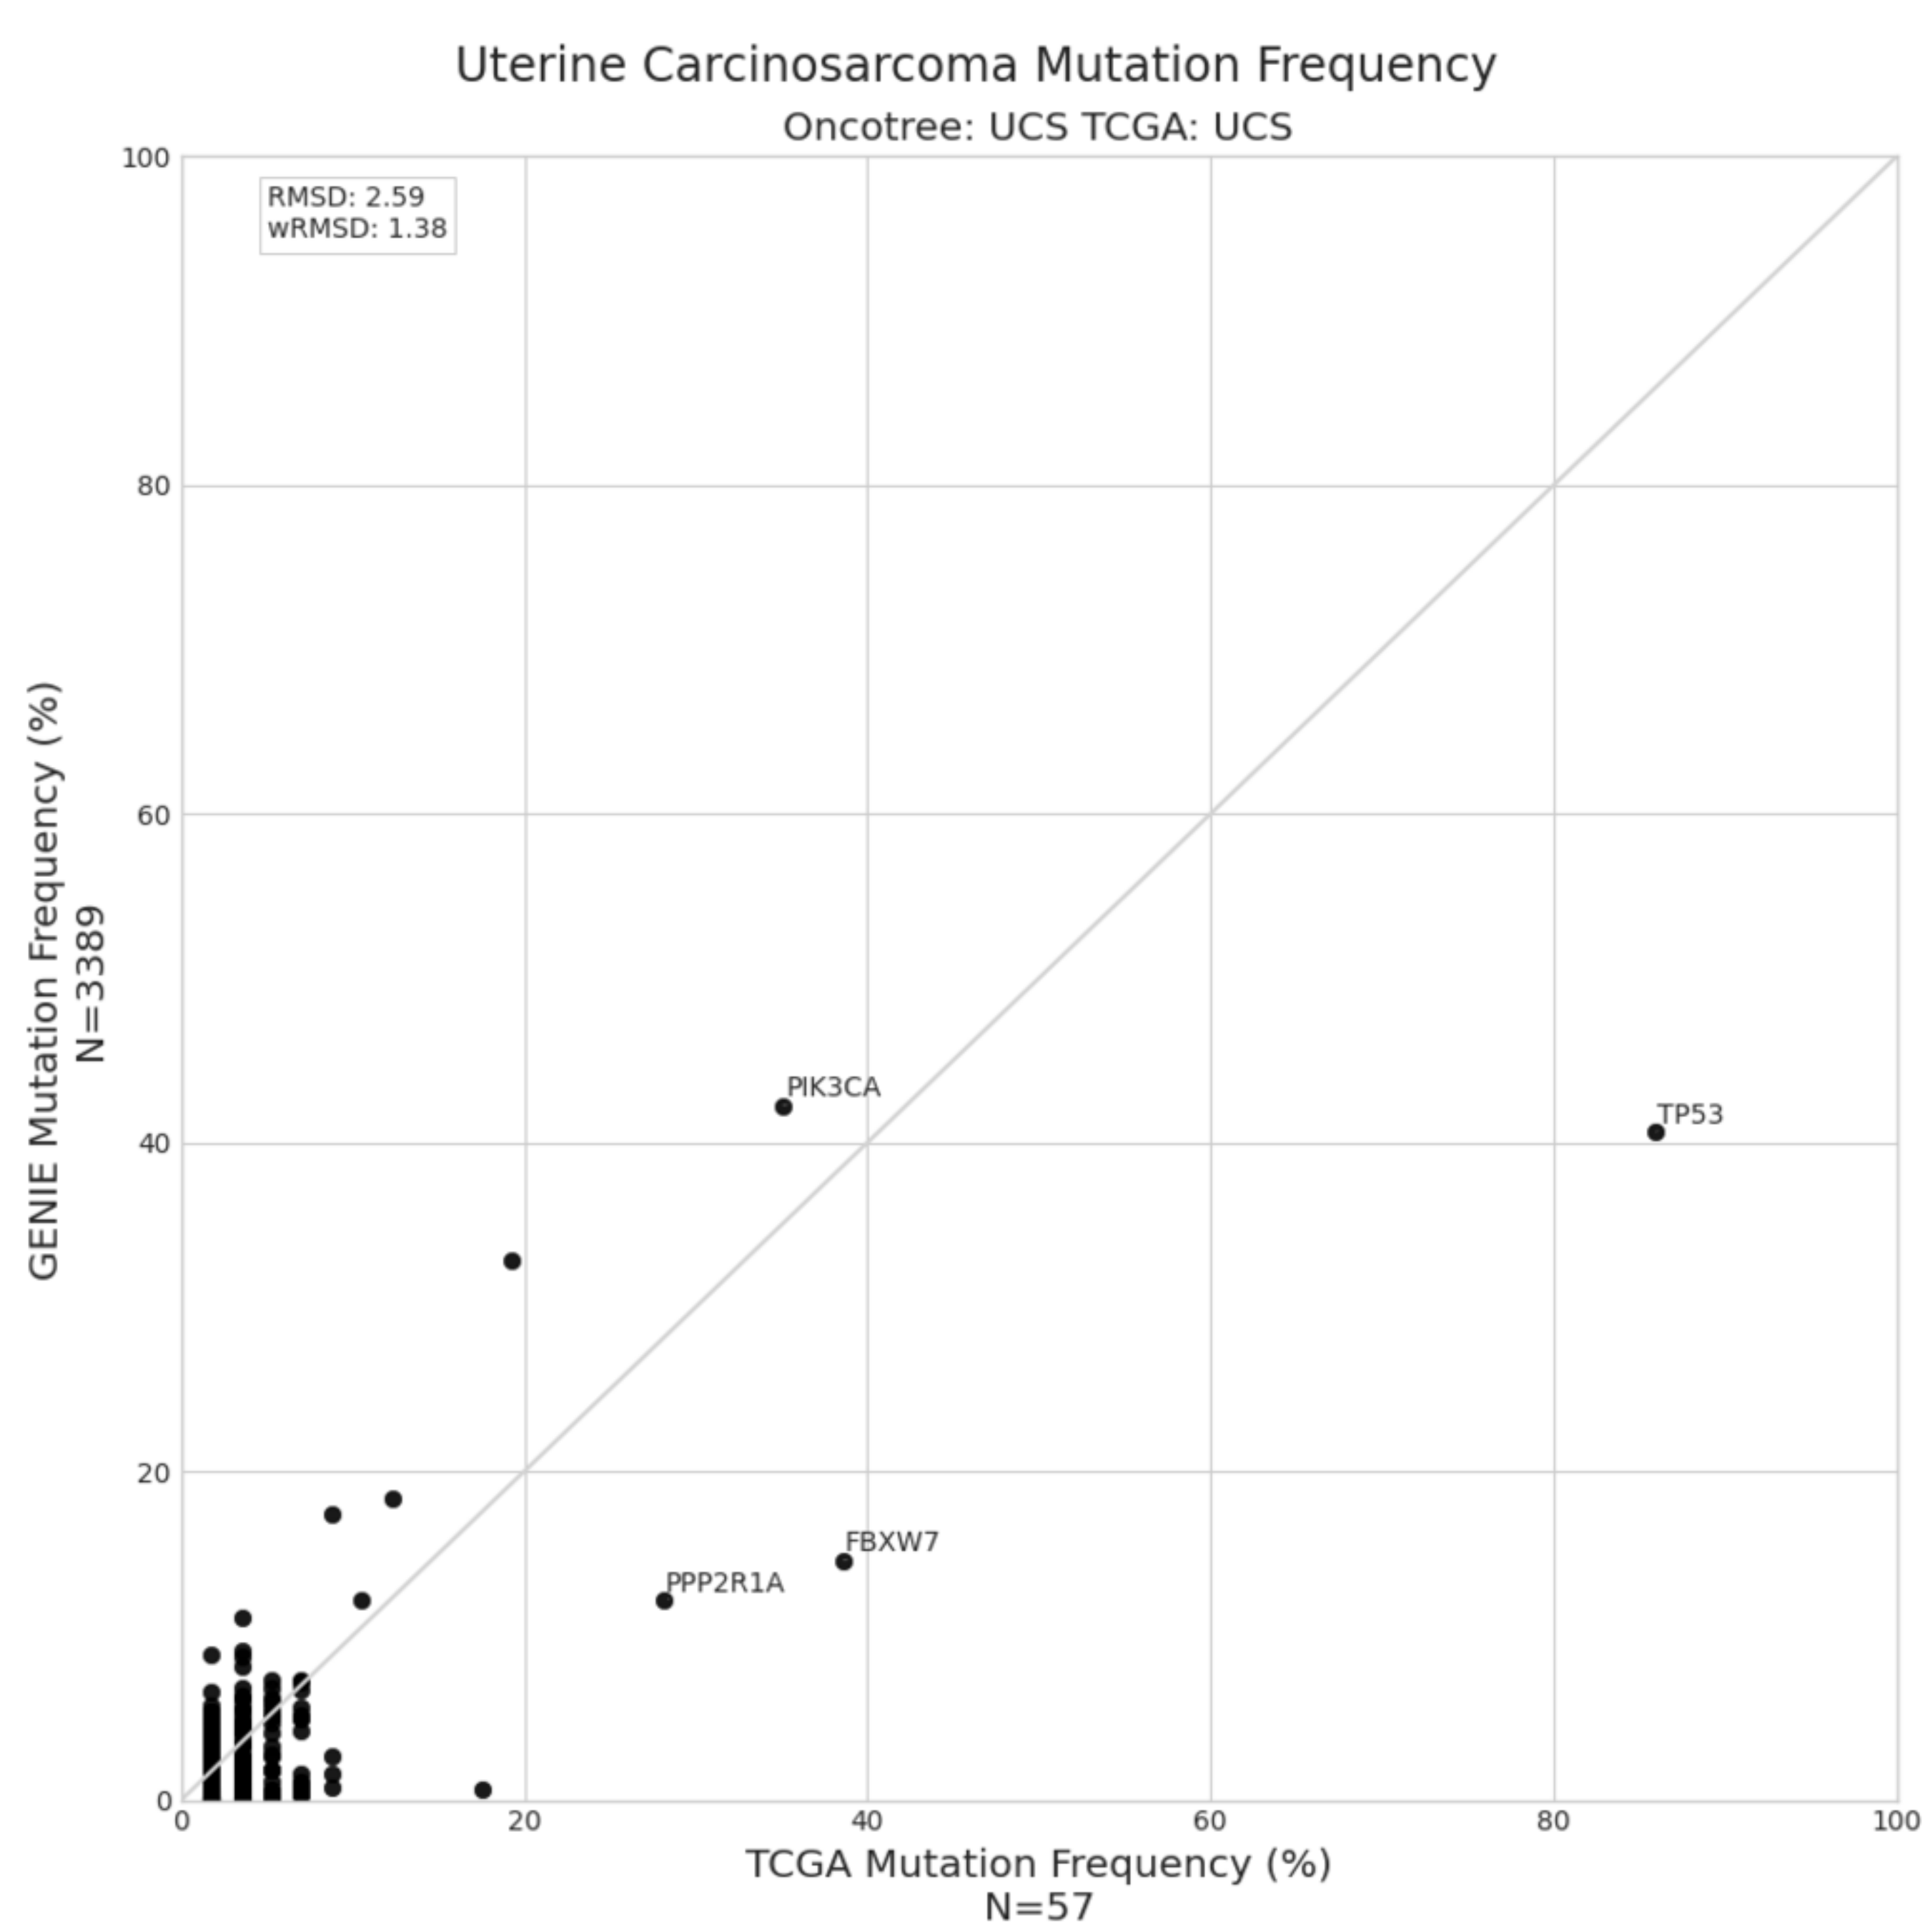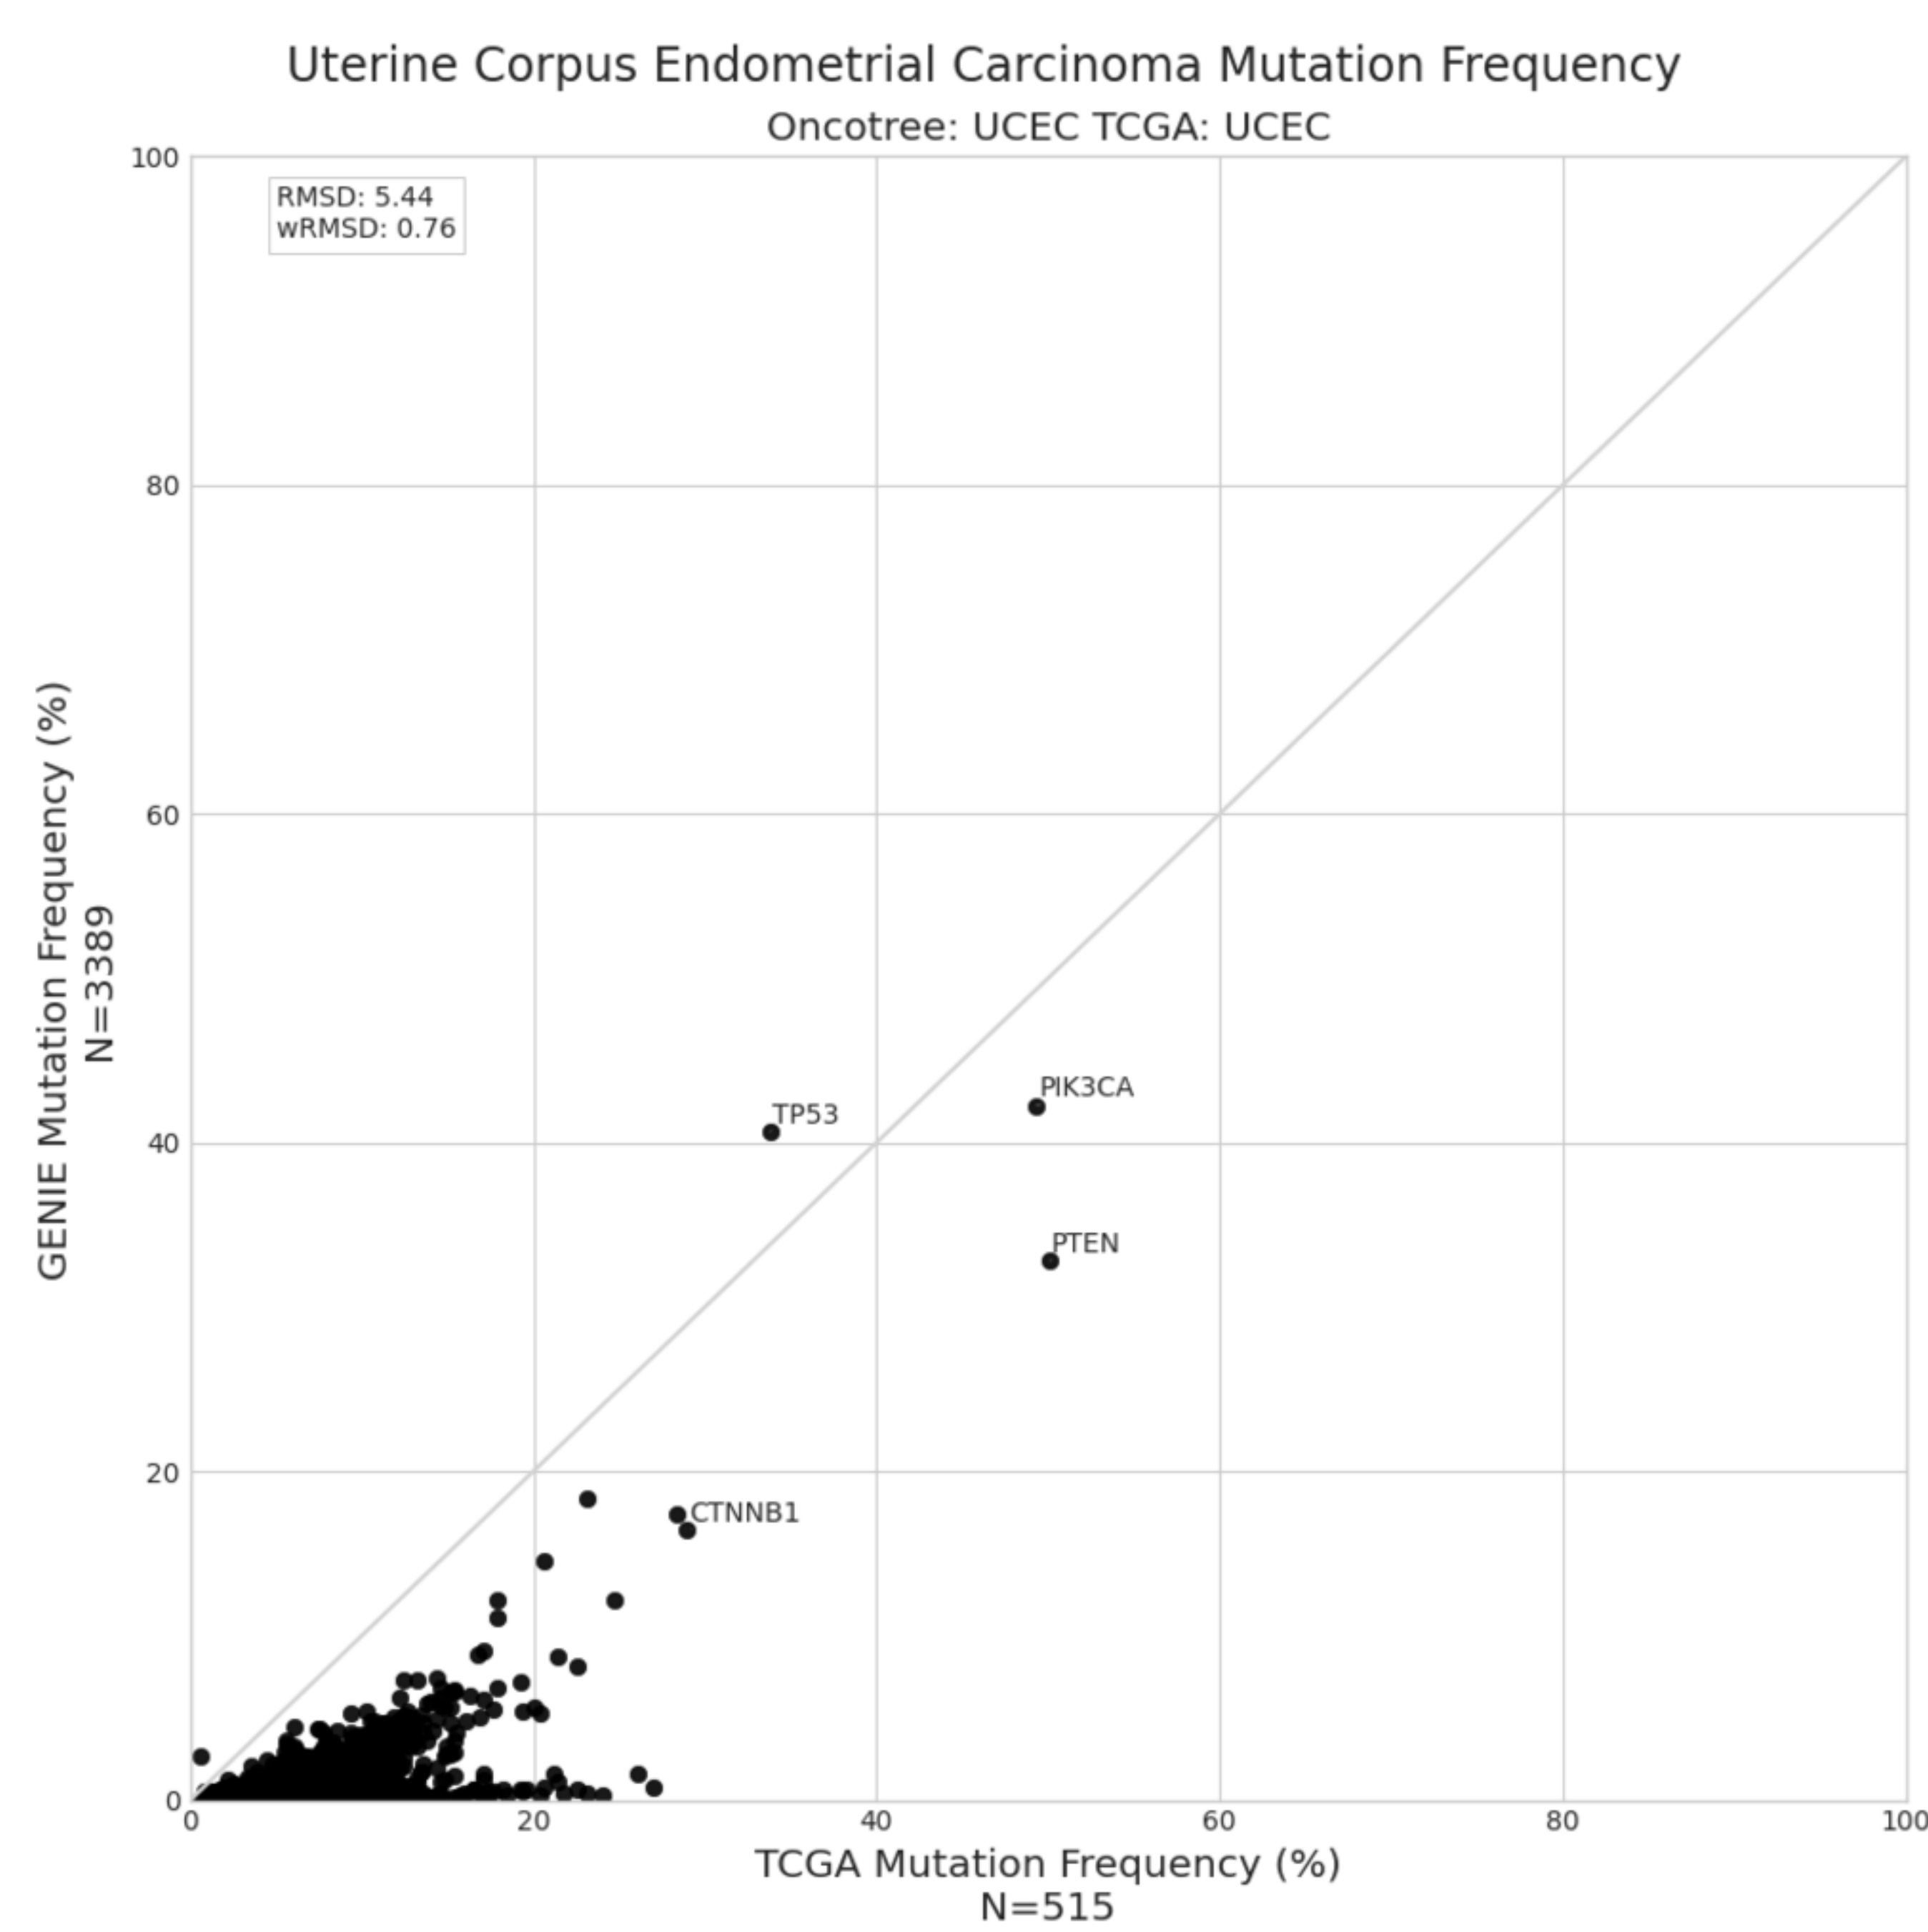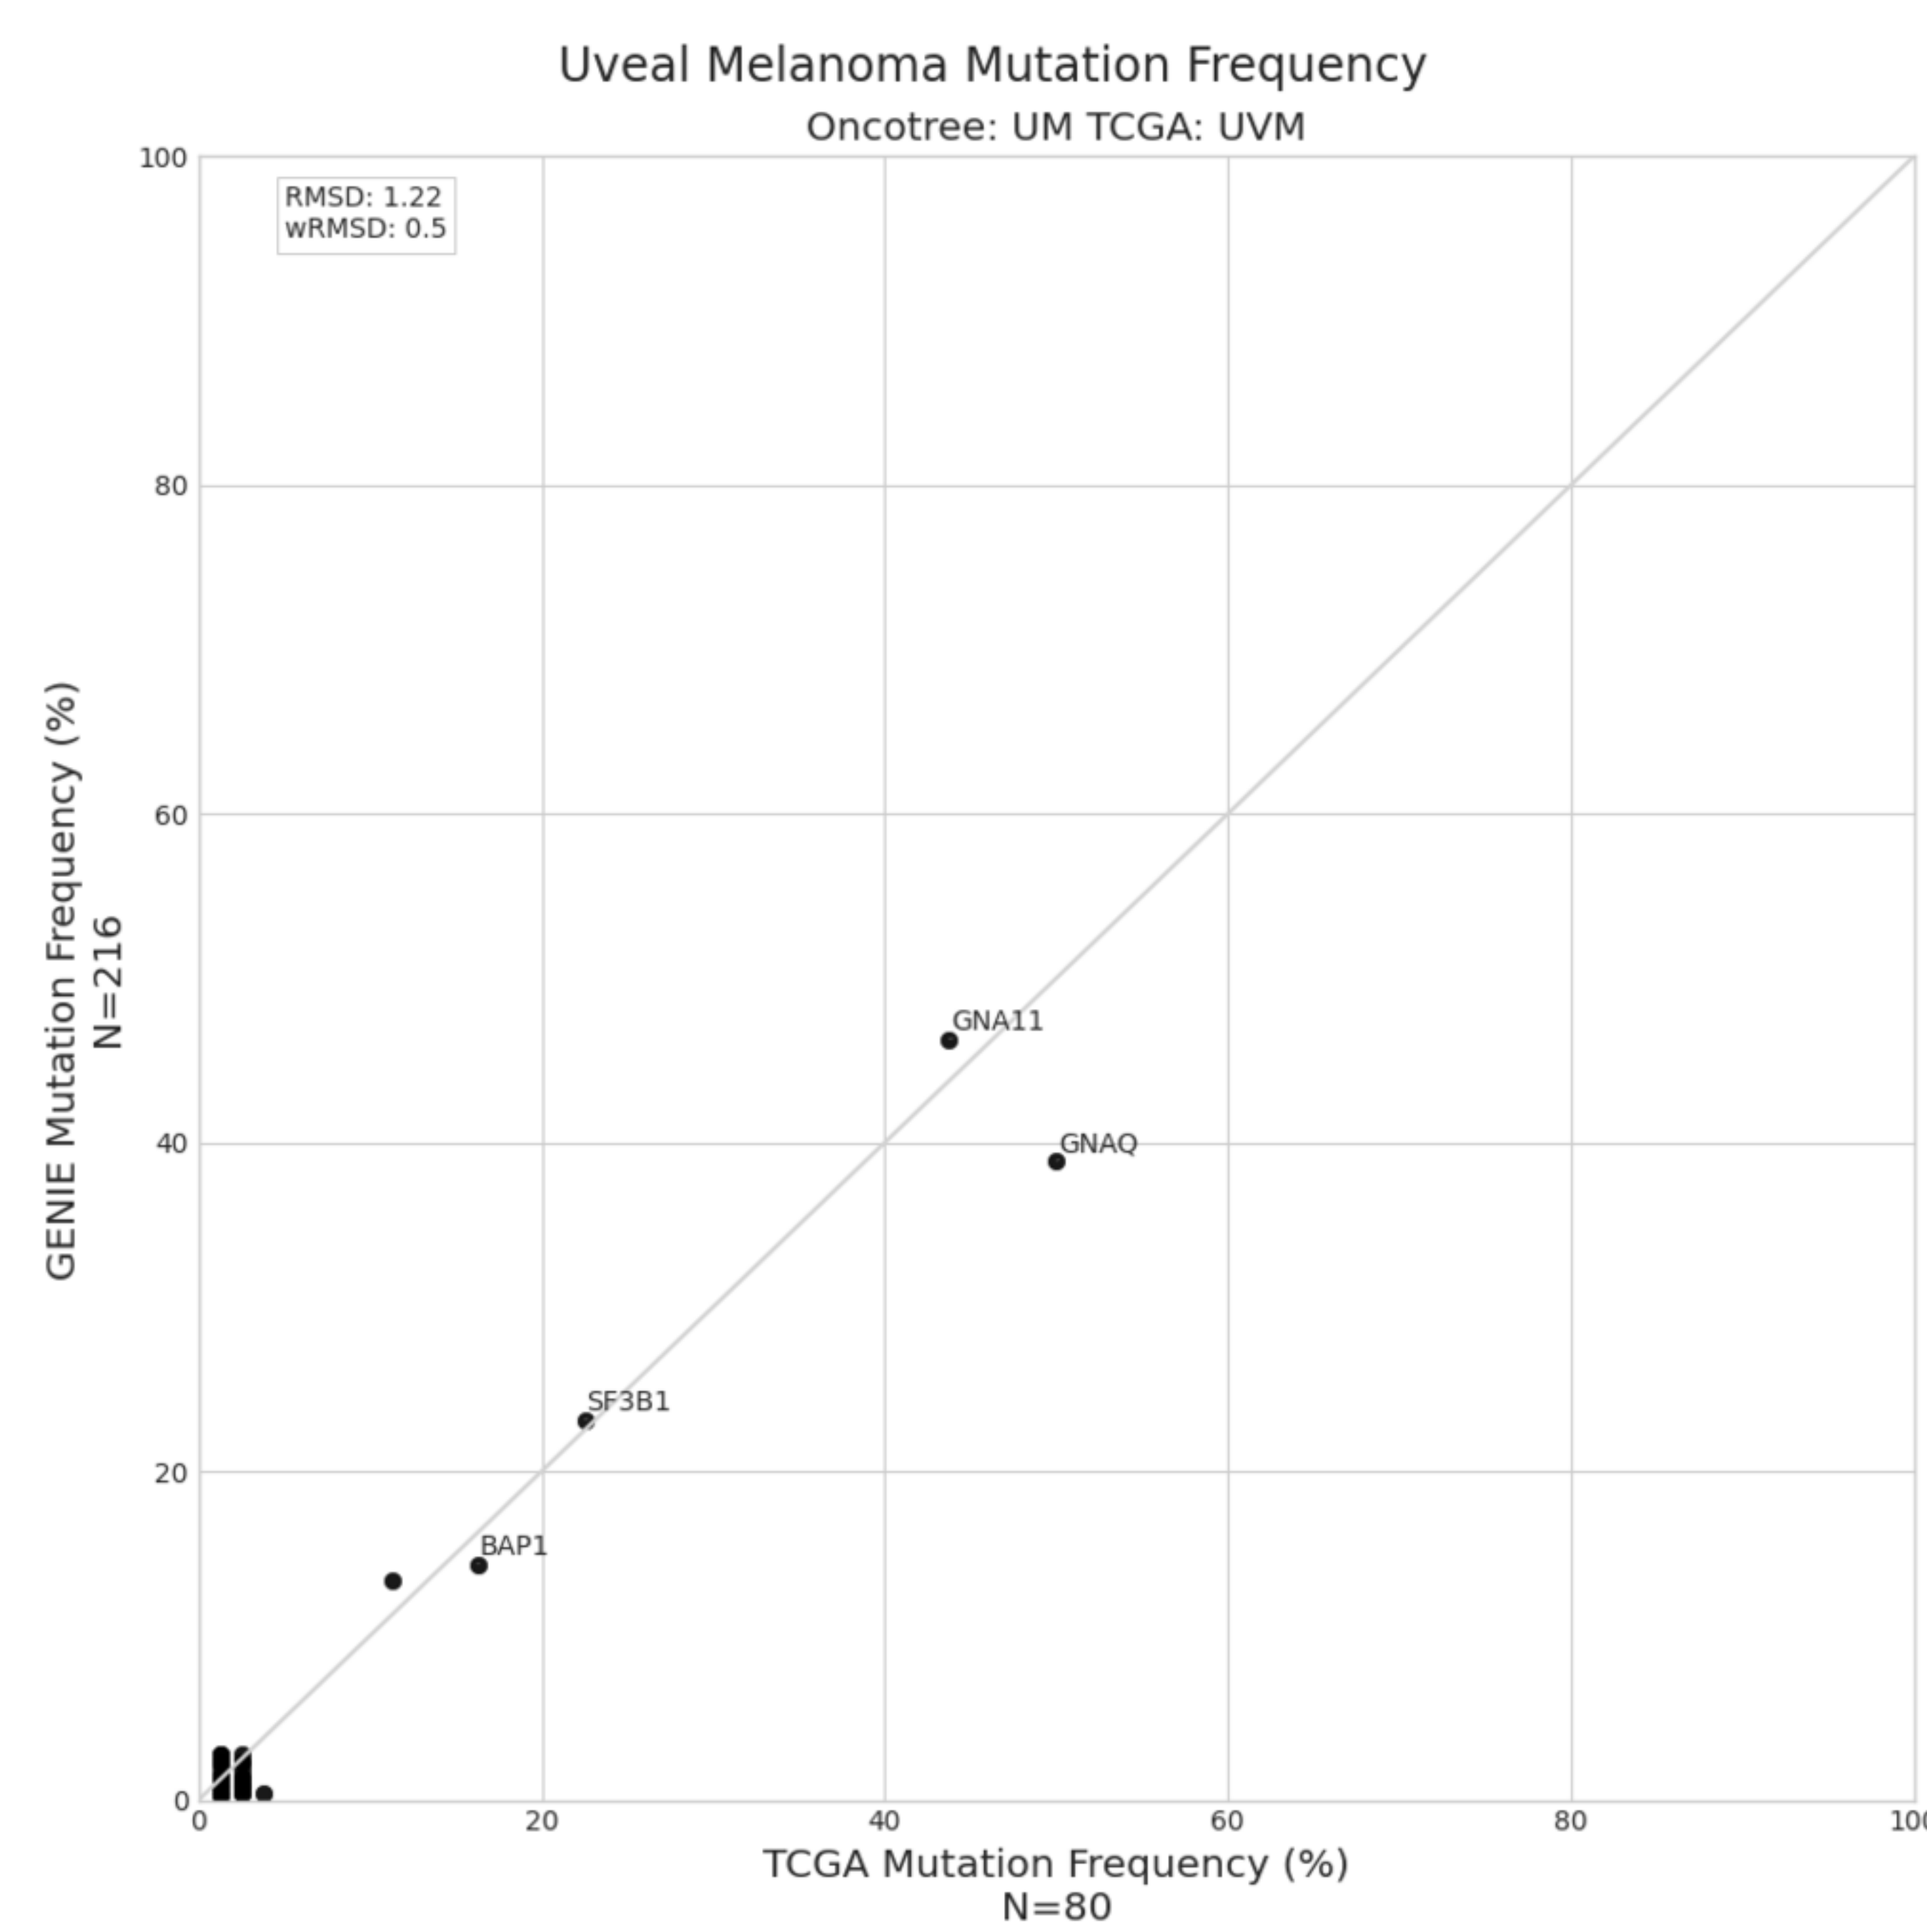

### **Supplemental Figure 2 - Gene-level mutation frequencies in GENIE versus TCGA**

Scatter plots comparing GENIE and TCGA mutation frequencies by gene, based on mappings between Oncotree and TCGA cancer types. Concordance was quantified by calculating root-mean-square deviation (RMSD) and weighted RMSD (wRMSD) from each gene to the diagonal line. Across the thirty three cancer types evaluated, the median wRMSD was 0.32 (interquartile range 0.13-0.55), with a few notable outliers at both the cancer and gene levels.
