# Supplementary material for: AACR Project GENIE: 100,000 Cases and Beyond
Source: PubMed Central journal article supplement — Cancer Discov. 2022 Jul 12;12(9):2044–57. doi: 10.1158/2159-8290.CD-21-1547 (PMC9437568; doi:10.1158/2159-8290.cd-21-1547), 2022-07-12
Supplement: cd-21-1547_supplementary_figure_4_suppsf4.pdf [file cd-21-1547_supplementary_figure_4_suppsf4.pdf]

A

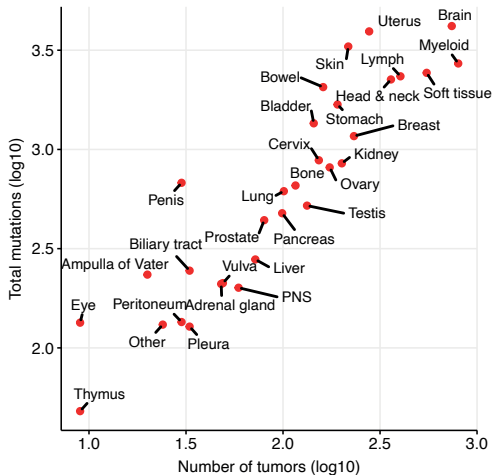

B

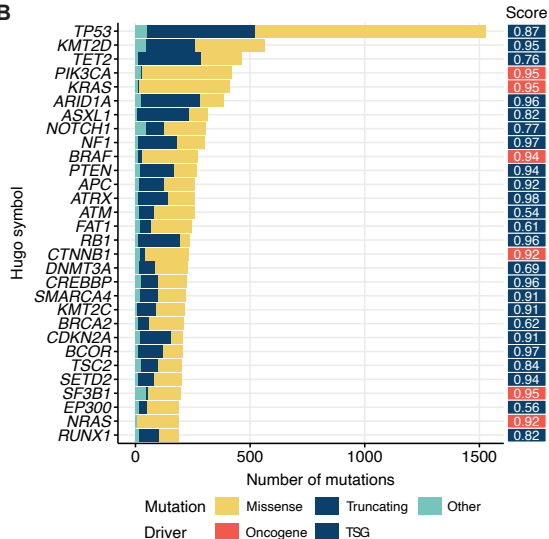

**Supplemental Figure 4 - Mutations in each rare tumor type identified in the GENIE cohort**

A. Scatter plot showing number of rare tumors sequenced and total number of mutations per organ-site.

B. The 30 most frequently mutated oncogenes and tumor suppressor genes within the rare tumor cohort and their corresponding driver scores.
