# Supplementary material for: AACR Project GENIE: 100,000 Cases and Beyond
Source: PubMed Central journal article supplement — Cancer Discov. 2022 Jul 12;12(9):2044–57. doi: 10.1158/2159-8290.CD-21-1547 (PMC9437568; doi:10.1158/2159-8290.cd-21-1547), 2022-07-12
Supplement: cd-21-1547_supplementary_figure_5_suppsf5.pdf [file cd-21-1547_supplementary_figure_5_suppsf5.pdf]

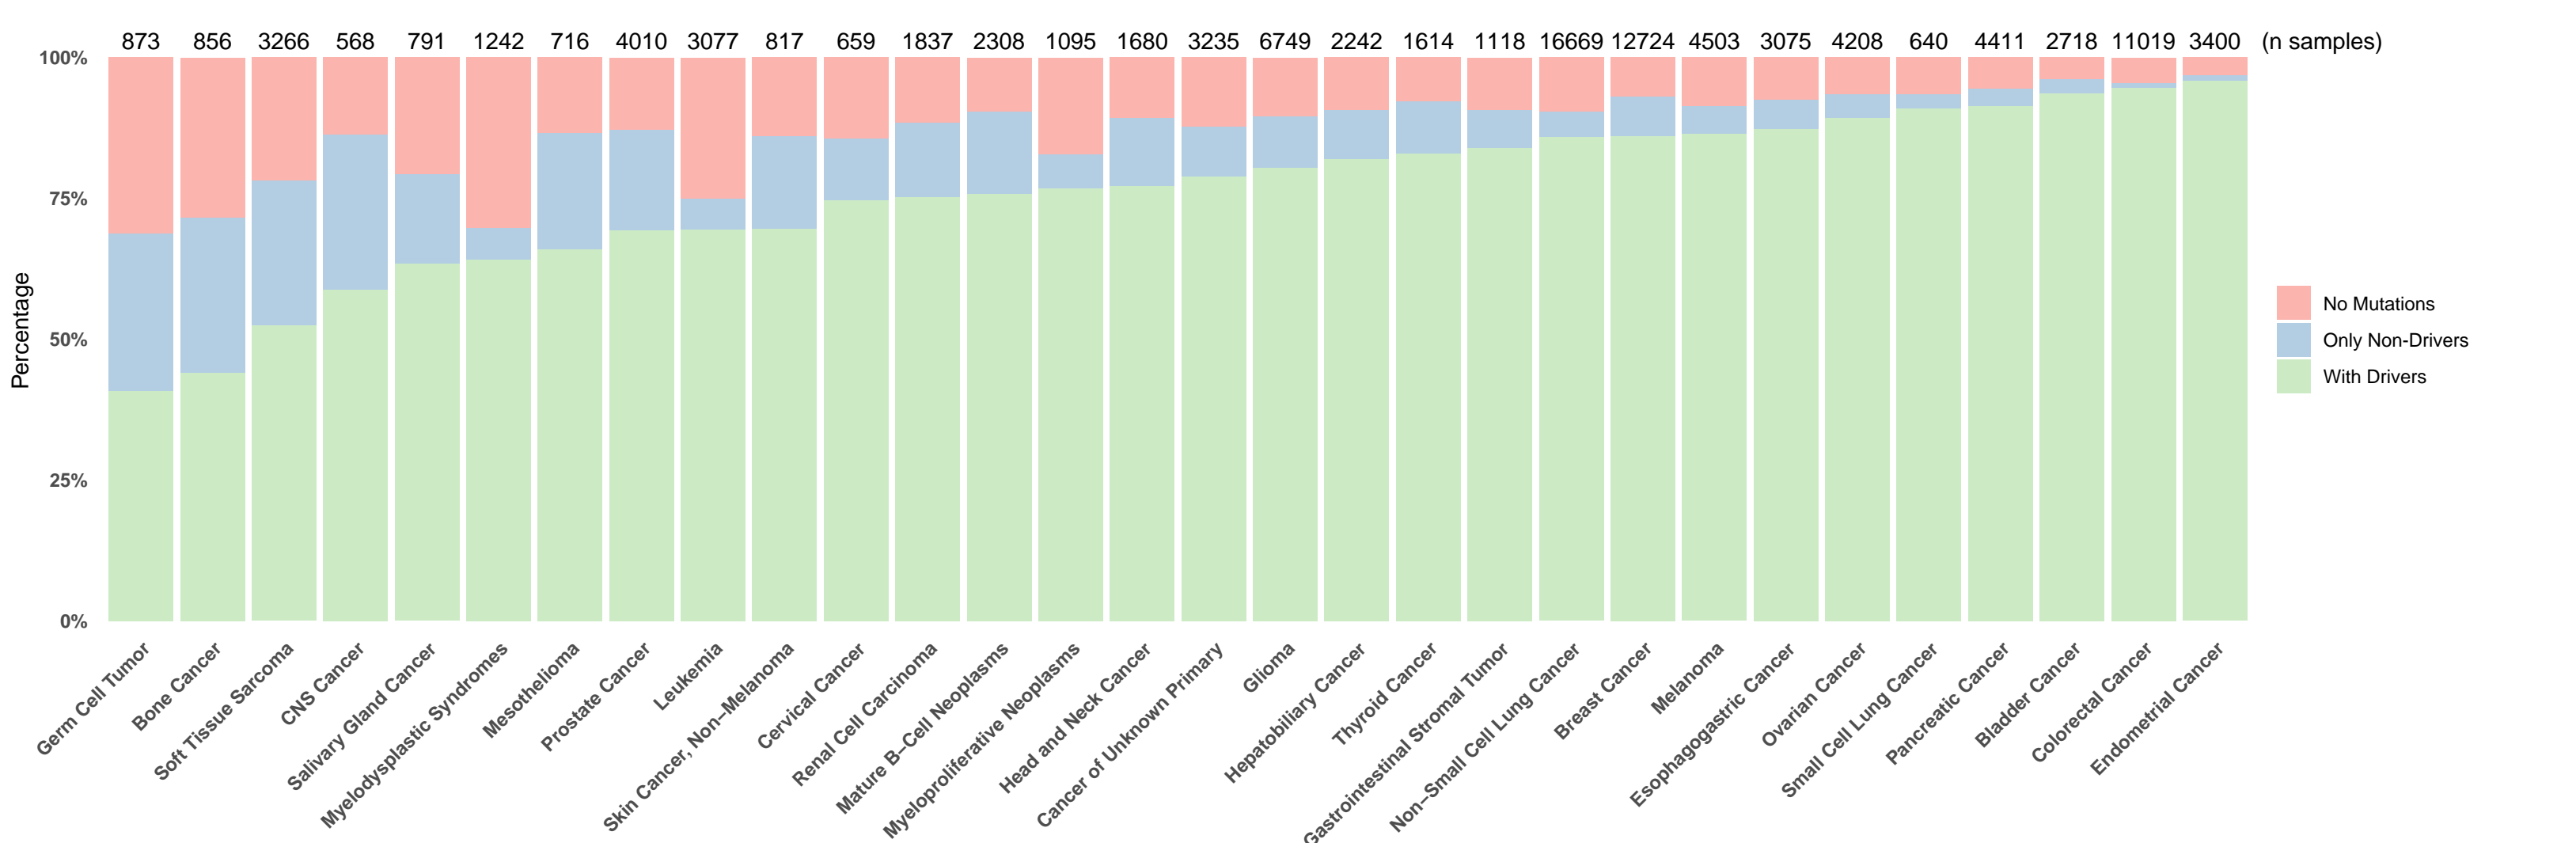

**Supplemental Figure 5 - Non-actionable cases.** Proportion of tissue samples with either i) no mutations detected ii) some mutations but no “drivers” detected and iii) at least one “driver” mutation detected. This graph includes the top 30 cancer types in the GENIE cohort by sample count.
