# Supplementary material for: AACR Project GENIE: 100,000 Cases and Beyond
Source: Oxford University Press journal article supplement (doi:10.1158/2159-8290.cd-21-1547), 2022-07-12
Supplement: cd-21-1547_supplementary_table_2_suppst2.xlsx [file cd-21-1547_supplementary_table_2_suppst2.xlsx]

## Sheet: Sheet1
Supplemental Table 2 - Clinical Data Elements. Clinical data elements collected for all patients in the GENIE dataset.
Data Element	Example Values	Data Description
AGE_AT_SEQ_REPORT	Integer values, <18 or >89.	The age of the patient at the time that the sequencing results were reported. Age is masked for patients aged 90 years and greater and for patients under 18 years.
CENTER	DFCI	The center submitting the clinical and genomic data.
	GRCC
	JHU
	MSK
	NKI
	UHN
	MDA
	VICC
ETHNICITY	Non-Spanish/non-Hispanic	Indication of Spanish/Hispanic origin of the patient; this data element maps to the NAACCR v16, Element #190. Institutions not collecting Spanish/Hispanic origin have set this column to Unknown.
	Spanish/Hispanic
	Unknown
ONCOTREE_CODE	LUAD	The primary cancer diagnosis code based on the OncoTree ontology (http://cbioportal.org/oncotree).
PATIENT_ID	GENIE-JHU-1234	The unique, anonymized patient identifier for the GENIE project. Conforms to the following convention: GENIE-CENTER-1234. The first component is the string, “GENIE”; the second component is the Center abbreviation. The third component is an anonymized unique identifier for the patient.
PRIMARY_RACE	Asian	The primary race recorded for the patient; this data element maps to the NAACCR v16, Element #160. For institutions collecting more than one race category, this race code is the primary race for the patient. Institutions not collecting race have set this field to Unknown.
	Black
	Native American
	Other
	Unknown
	White
SAMPLE_ID	GENIE-JHU-1234-9876	The unique, anonymized sample identifier for the GENIE project. Conforms to the following convention: GENIE-CENTER-1234-9876. The first component is the string, “GENIE”; the second component is the Center abbreviation. The third component is an anonymized, unique patient identifier. The fourth component is a unique identifier for the sample that will distinguish between two or more specimens from…
SAMPLE_TYPE	Primary	Sample type, e.g. Primary or Metastasis.
	Metastasis
	Unspecified
SEQ_ASSAY_ID	DFCI-ONCOPANEL-1	The institutional assay identifier for genomic testing platform. Components are separated by hyphens, with the first component corresponding to the Center’s abbreviation. All specimens tested by the same platform should have the same identifier.
	DFCI-ONCOPANEL-2
	MSK-IMPACT341
	MSK-IMPACT410
SEX	Female	The patient’s sex code; this data element maps to the NAACCR v16, Element #220.
	Male
CANCER_TYPE	Non-Small Cell Lung Cancer	The primary cancer diagnosis “main type”, based on the OncoTree ontology (http://cbioportal.org/oncotree). For example, the OncoTree code of LUAD maps to: “Non-Small Cell Lung Cancer”.
CANCER_TYPE_DETAILED	Lung Adenocarcinoma	The primary cancer diagnosis label, based on the OncoTree ontology (http://cbioportal.org/oncotree). For example, the OncoTree code of LUAD maps to the label: “Lung Adenocarcinoma (LUAD)”
