# Supplementary material for: AACR Project GENIE: 100,000 Cases and Beyond
Source: Oxford University Press journal article supplement (doi:10.1158/2159-8290.cd-21-1547), 2022-07-12
Supplement: cd-21-1547_supplementary_table_3_suppst3.xlsx [file cd-21-1547_supplementary_table_3_suppst3.xlsx]

## Sheet: Information
Supplemental Table 3 - Assay Information and Genomic Targets. List of all assays and targeted genomic regions utilized in the data release used for this analysis. This information is replicated from the assay_information.txt file and genomic_information.txt files from the Synapse AACR Project GENIE site accessible at https://www.synapse.org/#!Synapse:syn3380222
Filename	Synapse ID	File Location	Notes
assay_information_9.1-public.txt	syn22159815	Files » Releases » Release 09 » 9.1-public	Source file downloaded from Synapse.org AACR Project GENIE, https://www.synapse.org/#!Synapse:syn3380222
genomic_information.txt	syn7222066	Files » Data Releases » Release 09.1-public » genomic_information.txt	Genome coordinates correspond to GRCh37/hg19. Source file downloaded from Synapse.org AACR Project GENIE, https://www.synapse.org/#!Synapse:syn3380222

## Sheet: assay_information_9.1-public
SEQ_ASSAY_ID	is_paired_end	library_selection	library_strategy	platform	read_length	target_capture_kit	instrument_model	gene_padding	number_of_genes	variant_classifications	CENTER	alteration_types	preservation_technique	specimen_tumor_cellularity	calling_strategy	coverage	SEQ_PIPELINE_ID
CRUK-TS	True	Hybrid Selection	Targeted Sequencing	Illumina	100	Unknown	Illumina HiSeq 2000	10	174		CRUK	snv;small_indels;gene_level_cna	fresh_frozen	>10%	tumor_only	hotspot_regions	CRUK-TS
GRCC-CHP2	False	PCR	Targeted Sequencing	Ion Torrent	1	Ion AmpliSeq Cancer Hotspot Panel v2	Ion Torrent PGM	10	50		GRCC	snv;small_indels	fresh_frozen	>10%	tumor_only	hotspot_regions	GRCC
GRCC-CP1	False	PCR	Targeted Sequencing	Ion Torrent	1	Ion AmpliSeq Cancer Hotspot Panel v2	Ion Torrent PGM	10	40		GRCC	snv;small_indels	fresh_frozen	>10%	tumor_only	hotspot_regions	GRCC
GRCC-MOSC3	False	PCR	Targeted Sequencing	Ion Torrent	1	Ion AmpliSeq Cancer Hotspot Panel v2	Ion Torrent PGM	10	75		GRCC	snv;small_indels	fresh_frozen	>10%	tumor_only	hotspot_regions	GRCC
GRCC-MOSC4	False	PCR	Targeted Sequencing	Ion Torrent	1	Ion AmpliSeq Cancer Hotspot Panel v2	Ion Torrent PGM	10	75		GRCC	snv;small_indels	fresh_frozen	>10%	tumor_only	hotspot_regions	GRCC
MDA-46-V1	False	PCR	Targeted Sequencing	Ion Torrent	1	Custom AmpliSeq Cancer Hotspot GENIE-MDA Augmented Panel v1 - 46 Genes	Ion Torrent PGM	10	46		MDA	snv;small_indels	FFPE	>20%	tumor_only	hotspot_regions	MDA-46-V1
UCHI-ONCOHEME55-V1	True	PCR	Targeted Sequencing	Illumina	254	Kappa	Illumina MiSeq	10	55		UCHI	snv;small_indels	fresh_frozen	>5%	tumor_only	coding_exons	UCHI-ONCOHEME55-V1
UCHI-ONCOSCREEN50-V1	True	PCR	Targeted Sequencing	Illumina	152	Kappa	Illumina MiSeq	10	55		UCHI	snv;small_indels	FFPE	>30%	tumor_only	coding_exons	UCHI-ONCOSCREEN50-V1
WAKE-CA-01	False	Hybrid Selection	Targeted Sequencing	Illumina		Caris	Illumina HiSeq 2000	10	32		WAKE	snv;small_indels	FFPE;fresh_frozen	>20%	tumor_only	coding_exons	WAKE-CA
WAKE-CA-NGSQ3	False	Hybrid Selection	Targeted Sequencing	Illumina		Caris	Illumina HiSeq 2000	10	577		WAKE	snv;small_indels	FFPE;fresh_frozen	>20%	tumor_only	coding_exons	WAKE-CA
WAKE-CLINICAL-R2D2	False	Hybrid Selection	Targeted Sequencing	Illumina		Foundation Medicine R2D2 Panel	Illumina HiSeq 2000	10	234		WAKE	snv;small_indels	FFPE;fresh_frozen	>20%	tumor_only	coding_exons	WAKE-CLINICAL-R2D2
WAKE-CLINICAL-T5A	False	Hybrid Selection	Targeted Sequencing	Illumina		Foundation Medicine T5a Panel - 322 Genes	Illumina HiSeq 2000	10	70		WAKE	snv;small_indels	FFPE;fresh_frozen	>20%	tumor_only	coding_exons	WAKE-CLINICAL-T5A
WAKE-CLINICAL-T7	False	Hybrid Selection	Targeted Sequencing	Illumina		Foundation Medicine T7 Panel - 429 Genes	Illumina HiSeq 2000	10	308		WAKE	snv;small_indels	FFPE;fresh_frozen	>20%	tumor_only	coding_exons	WAKE-CLINICAL-T7
YALE-HSM-V1	False	PCR	Targeted Sequencing	Ion Torrent	200	Ion AmpliSeq Cancer Hotspot Panel v2	Ion Torrent S5	10	50		YALE	snv;small_indels	FFPE	>10%	tumor_only	hotspot_regions	YALE-HSM-V1
YALE-OCP-V2	False	PCR	Targeted Sequencing	Ion Torrent	200	Ion Oncomine Comprehensive Assay v2	Ion Torrent S5	10	134		YALE	snv;small_indels;gene_level_cna	FFPE	>10%	tumor_normal	hotspot_regions;coding_exons;introns;promoters	YALE-OCP
YALE-OCP-V3	False	PCR	Targeted Sequencing	Ion Torrent	200	Ion Oncomine Comprehensive Assay v3	Ion Torrent S5	10	146		YALE	snv;small_indels;gene_level_cna	FFPE	>10%	tumor_normal	hotspot_regions;coding_exons;introns;promoters	YALE-OCP
DFCI-ONCOPANEL-1	True	Hybrid Selection	Targeted Sequencing	Illumina	100	Custom GENIE-DFCI OncoPanel - 275 Genes		40	275		DFCI	snv;small_indels;gene_level_cna;structural_variants	FFPE	>20%	tumor_only	coding_exons;introns	DFCI-ONCOPANEL-1
DFCI-ONCOPANEL-2	True	Hybrid Selection	Targeted Sequencing	Illumina	100	Custom GENIE-DFCI Oncopanel - 300 Genes		40	300		DFCI	snv;small_indels;gene_level_cna	FFPE	>20%	tumor_only	coding_exons;introns	DFCI-ONCOPANEL-2
DFCI-ONCOPANEL-3	True	Hybrid Selection	Targeted Sequencing	Illumina	100	Custom GENIE-DFCI Oncopanel - 447 Genes		40	447		DFCI	snv;small_indels;gene_level_cna	FFPE	>20%	tumor_only	coding_exons;introns	DFCI-ONCOPANEL-3
NKI-TSACP-MISEQ-NGS	True	PCR	Targeted Sequencing	Illumina	170	TruSeq Amplicon - Cancer Panel	Illumina MiSeq	10	48		NKI	snv;small_indels	FFPE	>10%	tumor_only	hotspot_regions;coding_exons;introns;promoters	NKI-TSACP-MISEQ-NGS
MSK-IMPACT341	False	PCR	Targeted Sequencing	Ion Torrent	1	Custom MSK IMPACT Panel - 341 Genes		10	341		MSK	snv;small_indels;gene_level_cna;intragenic_cna;structural_variants	FFPE	>10%	tumor_normal	coding_exons;introns;promoters	MSK-IMPACT341
MSK-IMPACT410	False	PCR	Targeted Sequencing	Ion Torrent	1	Custom MSK IMPACT Panel - 410 Genes		10	410		MSK	snv;small_indels;gene_level_cna;intragenic_cna;structural_variants	FFPE	>10%	tumor_normal	coding_exons;introns;promoters	MSK-IMPACT410
MSK-IMPACT468	False	PCR	Targeted Sequencing	Ion Torrent	1	Custom MSK IMPACT Panel - 468 Genes		10	468		MSK	snv;small_indels;gene_level_cna;intragenic_cna;structural_variants	FFPE	>10%	tumor_normal	coding_exons;introns;promoters	MSK-IMPACT468
UHN-48-V1	False	PCR	Targeted Sequencing	Illumina	1	TruSeq Amplicon Cancer Panel	Illumina MiSeq	0	48		UHN	snv;small_indels	FFPE	>10%	tumor_normal	hotspot_regions;coding_exons	UHN-48-V1
UHN-50-V2	False	PCR	Targeted Sequencing	Ion Torrent	1	Ion AmpliSeq Cancer Hotspot Panel v2		0	50		UHN	snv;small_indels	FFPE	>10%	tumor_only	hotspot_regions;coding_exons	UHN-50-V2
UHN-54-V1	False	PCR	Targeted Sequencing	Illumina	1	TruSight Myeloid Sequencing Panel	Illumina MiSeq	0	54		UHN	snv;small_indels	FFPE	>10%	tumor_only	hotspot_regions;coding_exons	UHN-54-V1
UHN-555-V1	False	Hybrid Selection	Targeted Sequencing	Illumina	150	Custom SureSelect GENIE-UHN Panel - 555 Genes	Illumina NextSeq	10	556		UHN	snv;small_indels	FFPE	>10%	tumor_only	hotspot_regions;coding_exons	UHN-555
VICC-01-MYELOID	False	PCR	Targeted Sequencing	Illumina	1	Custom Myeloid GENIE-VICC Panel - 37 Genes		10	37		VICC	snv;small_indels	FFPE	>10%	tumor_only	hotspot_regions	VICC-01-MYELOID
VICC-01-SOLIDTUMOR	False	PCR	Targeted Sequencing	Illumina	1	Custom Solid Tumor GENIE-VICC Panel - 34 Genes		10	31		VICC	snv;small_indels	FFPE	>10%	tumor_only	hotspot_regions	VICC-01-SOLIDTUMOR
VICC-01-T5A	False	Hybrid Selection	Targeted Sequencing	Illumina	1	Foundation Medicine T5a Panel - 322 Genes		10	322		VICC	snv;small_indels;gene_level_cna;structural_variants	FFPE	>20%	tumor_only	coding_exons;introns	VICC-01-T5A
VICC-01-T7	False	Hybrid Selection	Targeted Sequencing	Illumina	1	Foundation Medicine T7 Panel - 429 Genes		10	429		VICC	snv;small_indels;gene_level_cna;structural_variants	FFPE	>20%	tumor_only	coding_exons;introns	VICC-01-T7
MDA-50-V1	False	PCR	Targeted Sequencing	Ion Torrent	1	Ion AmpliSeq Cancer Hotspot Panel v2	Ion Torrent PGM	10	50		MDA	snv;small_indels	FFPE	>20%	tumor_only	hotspot_regions	MDA-50-V1
PHS-FOCUS-V1	False	PCR	Targeted Sequencing	Ion Torrent		Oncomine Focus Assay, AmpliSeq Library	Ion Torrent PGM	10	46		PHS	snv;small_indels	FFPE	>20%	tumor_normal	coding_exons	PHS-FOCUS-V1
UHN-555-BLADDER-V1	False	Hybrid Selection	Targeted Sequencing	Illumina	150	Custom SureSelect GENIE-UHN Panel - 555 Genes	Illumina NextSeq	10	556		UHN	snv;small_indels	FFPE	>10%	tumor_only	hotspot_regions;coding_exons	UHN-555
UHN-555-BREAST-V1	False	Hybrid Selection	Targeted Sequencing	Illumina	150	Custom SureSelect GENIE-UHN Panel - 555 Genes	Illumina NextSeq	10	556		UHN	snv;small_indels	FFPE	>10%	tumor_only	hotspot_regions;coding_exons	UHN-555
UHN-555-GLIOMA-V1	False	Hybrid Selection	Targeted Sequencing	Illumina	150	Custom SureSelect GENIE-UHN Panel - 555 Genes	Illumina NextSeq	10	556		UHN	snv;small_indels	FFPE	>10%	tumor_only	hotspot_regions;coding_exons	UHN-555
UHN-555-GYNE-V1	False	Hybrid Selection	Targeted Sequencing	Illumina	150	Custom SureSelect GENIE-UHN Panel - 555 Genes	Illumina NextSeq	10	556		UHN	snv;small_indels	FFPE	>10%	tumor_only	hotspot_regions;coding_exons	UHN-555
UHN-555-HEAD-NECK-V1	False	Hybrid Selection	Targeted Sequencing	Illumina	150	Custom SureSelect GENIE-UHN Panel - 555 Genes	Illumina NextSeq	10	556		UHN	snv;small_indels	FFPE	>10%	tumor_only	hotspot_regions;coding_exons	UHN-555
UHN-555-LUNG-V1	False	Hybrid Selection	Targeted Sequencing	Illumina	150	Custom SureSelect GENIE-UHN Panel - 555 Genes	Illumina NextSeq	10	556		UHN	snv;small_indels	FFPE	>10%	tumor_only	hotspot_regions;coding_exons	UHN-555
UHN-555-MELANOMA-V1	False	Hybrid Selection	Targeted Sequencing	Illumina	150	Custom SureSelect GENIE-UHN Panel - 555 Genes	Illumina NextSeq	10	556		UHN	snv;small_indels	FFPE	>10%	tumor_only	hotspot_regions;coding_exons	UHN-555
UHN-555-PAN-GI-V1	False	Hybrid Selection	Targeted Sequencing	Illumina	150	Custom SureSelect GENIE-UHN Panel - 555 Genes	Illumina NextSeq	10	556		UHN	snv;small_indels	FFPE	>10%	tumor_only	hotspot_regions;coding_exons	UHN-555
UHN-555-PROSTATE-V1	False	Hybrid Selection	Targeted Sequencing	Illumina	150	Custom SureSelect GENIE-UHN Panel - 555 Genes	Illumina NextSeq	10	556		UHN	snv;small_indels	FFPE	>10%	tumor_only	hotspot_regions;coding_exons	UHN-555
UHN-555-RENAL-V1	False	Hybrid Selection	Targeted Sequencing	Illumina	150	Custom SureSelect GENIE-UHN Panel - 555 Genes	Illumina NextSeq	10	556		UHN	snv;small_indels	FFPE	>10%	tumor_only	hotspot_regions;coding_exons	UHN-555
UHN-OCA-V3	False	PCR	Targeted Sequencing	Ion Torrent	200	Ion Oncomine Comprehensive Assay v3	Other	0	146		UHN	snv;small_indels	FFPE	>10%	tumor_only	hotspot_regions;coding_exons	UHN-OCA-V3
CHOP-STNGS	True	Hybrid Selection	Targeted Sequencing	Illumina	150	Custom GENIE-CHOP-STNGS Panel - 238 Genes	Illumina HiSeq 2500	10	238		CHOP	snv;small_indels;gene_level_cna;intragenic_cna;structural_variants	FFPE;fresh_frozen	>30%	tumor_only	hotspot_regions;coding_exons;introns;promoters	CHOP-STNGS
CHOP-HEMEP	True	Hybrid Selection	Targeted Sequencing	Illumina	150	Custom GENIE-CHOP-HEMEP Panel - 118 Genes	Illumina HiSeq 2500	10	118		CHOP	snv;small_indels;gene_level_cna;intragenic_cna;structural_variants	FFPE;fresh_frozen	>30%	tumor_only	hotspot_regions;coding_exons;introns;promoters	CHOP-HEMEP
COLU-CCCP-V1	True	Hybrid Selection	Targeted Sequencing	Illumina	110	Custom CCCPv1 Panel	Illumina HiSeq 2500	10	465		COLU	snv;small_indels;gene_level_cna;intragenic_cna;structural_variants	FFPE;fresh_frozen	>30%	tumor_only	hotspot_regions;coding_exons;introns;promoters	COLU-CCCP-V1
COLU-TSACP-V1	True	PCR	Targeted Sequencing	Illumina	150	TruSeq Amplicon Cancer Panel	Illumina MiSeq	10	49		COLU	snv;small_indels;gene_level_cna	FFPE	>40%	tumor_only	coding_exons;introns	COLU-TSACP-V1
DUKE-F1-DX1	True	Hybrid Selection	Targeted Sequencing	Illumina	1	FoundationOne CDx Panel	Illumina HiSeq 4000	10	324	Missense_Mutation	DUKE	snv;small_indels;structural_variants	FFPE	>20%	tumor_only	coding_exons;introns	DUKE-F1-DX1
DUKE-F1-T5A	True	Hybrid Selection	Targeted Sequencing	Illumina	1	Foundation Medicine T5a Panel - 322 Genes	Illumina HiSeq 4000	10	322	Missense_Mutation	DUKE	snv;small_indels;gene_level_cna;structural_variants	FFPE	>20%	tumor_only	coding_exons;introns	DUKE-F1-T5A
DUKE-F1-T7	True	Hybrid Selection	Targeted Sequencing	Illumina	1	Foundation Medicine T7 Panel - 429 Genes	Illumina HiSeq 4000	10	429	Missense_Mutation	DUKE	snv;small_indels;structural_variants	FFPE	>20%	tumor_only	coding_exons;introns	DUKE-F1-T7
SCI-PMP68-V1	True	PCR	Targeted Sequencing	Illumina	150	TruSeq Amplicon Cancer Panel	Illumina MiSeq	10	68	Missense_Mutation;Frame_Shift_Ins	SCI	snv;small_indels	FFPE	>10%	tumor_only	hotspot_regions	SCI-PMP68-V1
JHU-50GP	False	PCR	Targeted Sequencing	Ion Torrent	1	Ion AmpliSeq Cancer Hotspot Panel v2		10	50		JHU	snv;small_indels	FFPE	>10%	tumor_only	hotspot_regions	JHU-50
JHU-500STP	False	PCR	Targeted Sequencing	Illumina	1	Illumina NGS instruments		10	760		JHU	snv;small_indels	FFPE	>10%	tumor_only	hotspot_regions	JHU-500STP
VHIO-BILIARY-V01	True	PCR	Targeted Sequencing	Illumina	151	VHIO Custom Amplicon panel-hotspots	Illumina MiSeq	10	59	Missense_Mutation	VHIO	snv;small_indels	FFPE	>20%	tumor_only	hotspot_regions;coding_exons	VHIO-CUSTOM
VHIO-BRAIN-V01	True	PCR	Targeted Sequencing	Illumina	151	VHIO Custom Amplicon panel-hotspots	Illumina MiSeq	10	57	Missense_Mutation	VHIO	snv;small_indels	FFPE	>20%	tumor_only	hotspot_regions;coding_exons	VHIO-CUSTOM
VHIO-BREAST-V01	True	PCR	Targeted Sequencing	Illumina	151	VHIO Custom Amplicon panel-hotspots	Illumina MiSeq	10	60	Missense_Mutation	VHIO	snv;small_indels	FFPE	>20%	tumor_only	hotspot_regions;coding_exons	VHIO-CUSTOM
VHIO-COLORECTAL-V01	True	PCR	Targeted Sequencing	Illumina	151	VHIO Custom Amplicon panel-hotspots	Illumina MiSeq	10	60	Missense_Mutation	VHIO	snv;small_indels	FFPE	>20%	tumor_only	hotspot_regions;coding_exons	VHIO-CUSTOM
VHIO-ENDOMETRIUM-V01	True	PCR	Targeted Sequencing	Illumina	151	VHIO Custom Amplicon panel-hotspots	Illumina MiSeq	10	60	Missense_Mutation	VHIO	snv;small_indels	FFPE	>20%	tumor_only	hotspot_regions;coding_exons	VHIO-CUSTOM
VHIO-GASTRIC-V01	True	PCR	Targeted Sequencing	Illumina	151	VHIO Custom Amplicon panel-hotspots	Illumina MiSeq	10	63	Missense_Mutation	VHIO	snv;small_indels	FFPE	>20%	tumor_only	hotspot_regions;coding_exons	VHIO-CUSTOM
VHIO-GENERAL-V01	True	PCR	Targeted Sequencing	Illumina	151	VHIO Custom Amplicon panel-hotspots	Illumina MiSeq	10	56	Missense_Mutation	VHIO	snv;small_indels	FFPE	>20%	tumor_only	hotspot_regions;coding_exons	VHIO-CUSTOM
VHIO-HEAD-NECK-V01	True	PCR	Targeted Sequencing	Illumina	151	VHIO Custom Amplicon panel-hotspots	Illumina MiSeq	10	61	Missense_Mutation	VHIO	snv;small_indels	FFPE	>20%	tumor_only	hotspot_regions;coding_exons	VHIO-CUSTOM
VHIO-KIDNEY-V01	True	PCR	Targeted Sequencing	Illumina	151	VHIO Custom Amplicon panel-hotspots	Illumina MiSeq	10	59	Missense_Mutation	VHIO	snv;small_indels	FFPE	>20%	tumor_only	hotspot_regions;coding_exons	VHIO-CUSTOM
VHIO-LUNG-V01	True	PCR	Targeted Sequencing	Illumina	151	VHIO Custom Amplicon panel-hotspots	Illumina MiSeq	10	58	Missense_Mutation	VHIO	snv;small_indels	FFPE	>20%	tumor_only	hotspot_regions;coding_exons	VHIO-CUSTOM
VHIO-OVARY-V01	True	PCR	Targeted Sequencing	Illumina	151	VHIO Custom Amplicon panel-hotspots	Illumina MiSeq	10	58	Missense_Mutation	VHIO	snv;small_indels	FFPE	>20%	tumor_only	hotspot_regions;coding_exons	VHIO-CUSTOM
VHIO-PANCREAS-V01	True	PCR	Targeted Sequencing	Illumina	151	VHIO Custom Amplicon panel-hotspots	Illumina MiSeq	10	60	Missense_Mutation	VHIO	snv;small_indels	FFPE	>20%	tumor_only	hotspot_regions;coding_exons	VHIO-CUSTOM
VHIO-PAROTIDE-V01	True	PCR	Targeted Sequencing	Illumina	151	VHIO Custom Amplicon panel-hotspots	Illumina MiSeq	10	58	Missense_Mutation	VHIO	snv;small_indels	FFPE	>20%	tumor_only	hotspot_regions;coding_exons	VHIO-CUSTOM
VHIO-SKIN-V01	True	PCR	Targeted Sequencing	Illumina	151	VHIO Custom Amplicon panel-hotspots	Illumina MiSeq	10	60	Missense_Mutation	VHIO	snv;small_indels	FFPE	>20%	tumor_only	hotspot_regions;coding_exons	VHIO-CUSTOM
DFCI-ONCOPANEL-3.1	True	Hybrid Selection	Targeted Sequencing	Illumina	100	Custom GENIE-DFCI Oncopanel - 447 Genes		40	447		DFCI	snv;small_indels;gene_level_cna	FFPE	>20%	tumor_only	coding_exons;introns	DFCI-ONCOPANEL-3
NKI-PATH-NGS	True	PCR	Targeted Sequencing	Illumina	170	PATH (Predictive analysis for therapy) panel	Illumina NextSeq	10	32		NKI	snv;small_indels	FFPE	>10%	tumor_only	hotspot_regions;coding_exons;introns;promoters	NKI-PATH-NGS
NKI-CHPV2-NGS	True	PCR	Targeted Sequencing	Illumina	170	Ion AmpliSeq Cancer Hotspot Panel v2	Illumina MiSeq	10	50		NKI	snv;small_indels	FFPE	>10%	tumor_only	hotspot_regions;coding_exons;introns;promoters	NKI-CHPV2-NGS
NKI-CHPV2-SOCV2-NGS	True	PCR	Targeted Sequencing	Illumina	170	Ion AmpliSeq Cancer Hotspot Panel v2 plus SOCv2	Illumina MiSeq	10	52		NKI	snv;small_indels	FFPE	>10%	tumor_only	hotspot_regions;coding_exons;introns;promoters	NKI-CHPV2-SOCV2-NGS
VHIO-BREAST-V02	True	PCR	Targeted Sequencing	Illumina	151	VHIO Custom Amplicon panel-hotspots	Illumina MiSeq	10	62	Missense_Mutation	VHIO	snv;small_indels	FFPE	>20%	tumor_only	hotspot_regions;coding_exons	VHIO-CUSTOM
NKI-CHP-V2-PLUS	False	PCR	Targeted Sequencing	Ion Torrent	120	Ion AmpliSeq Cancer Hotspot Panel v2	Ion Torrent S5	10	52		NKI	snv;small_indels	FFPE	>10%	tumor_only	hotspot_regions	NKI-CHP-V2-PLUS
MDA-409-V1	False	PCR	Targeted Sequencing	Ion Torrent	1	Ion AmpliSeq Comprehensive Cancer Panel	Ion Torrent Proton	10	409		MDA	snv;small_indels	FFPE	>20%	tumor_only	hotspot_regions	MDA-409-V1
UCSF-NIMV4-TO	True	Hybrid Selection	Targeted Sequencing	Illumina	100	Custom GENIE-UCSF-NIMV4 Panel - 478 Genes	Illumina HiSeq 2500	10	478		UCSF	snv;small_indels;gene_level_cna;intragenic_cna;structural_variants	FFPE;fresh_frozen	>25%	tumor_only	coding_exons;introns;promoters	UCSF-NIMV4
UCSF-NIMV4-TN	True	Hybrid Selection	Targeted Sequencing	Illumina	100	Custom GENIE-UCSF-NIMV4 Panel - 478 Genes	Illumina HiSeq 2500	10	478		UCSF	snv;small_indels;gene_level_cna;intragenic_cna;structural_variants	FFPE;fresh_frozen	>25%	tumor_normal	coding_exons;introns;promoters	UCSF-NIMV4
VHIO-URINARY-BLADDER-V01	True	PCR	Targeted Sequencing	Illumina	151	VHIO Custom Amplicon panel-hotspots	Illumina MiSeq	10	61	Missense_Mutation	VHIO	snv;small_indels	FFPE	>20%	tumor_only	hotspot_regions;coding_exons	VHIO-CUSTOM
COLU-CSTP-V1	True	PCR	Targeted Sequencing	Illumina	150	TruSeq Amplicon Cancer Panel	Illumina MiSeq	10	45		COLU	snv;small_indels;gene_level_cna	FFPE	>40%	tumor_only	coding_exons;introns	COLU-CSTP-V1
UHN-555-V2	False	Hybrid Selection	Targeted Sequencing	Illumina	150	Custom SureSelect GENIE-UHN Panel - 555 Genes	Illumina NextSeq	10	564		UHN	snv;small_indels	FFPE	>10%	tumor_only	hotspot_regions;coding_exons	UHN-555
PHS-TRISEQ-V2	True	Hybrid Selection	WXS	Illumina	150	xGen Exome Research Panel v1	Illumina HiSeq 4000	10	323		PHS	snv;small_indels	FFPE	>20%	tumor_normal	coding_exons	PHS-TRISEQ-V2
PHS-TST170-V1	True	Hybrid Selection	Targeted Sequencing	Illumina	150	TruSight Tumor 170	Illumina HiSeq 4000	10	160		PHS	snv;small_indels;gene_level_cna;structural_variants	FFPE	>20%	tumor_normal	coding_exons;hotspot_regions	PHS-TST170-V1
MSK-IMPACT-HEME-399	False	PCR	Targeted Sequencing	Ion Torrent	1	Custom MSK IMPACT HEME Panel - 399 Genes		10	399		MSK	snv;small_indels;gene_level_cna;intragenic_cna;structural_variants	FFPE	>10%	tumor_normal	coding_exons;introns;promoters	MSK-IMPACT-HEME-399

## Sheet: genomic_information
Chromosome	Start_Position	End_Position	Hugo_Symbol	ID	SEQ_ASSAY_ID	Feature_Type	includeInPanel
9	133738302	133738491	ABL1	ABL1	UHN-48-V1	exon	True
9	133747476	133747664	ABL1	ABL1	UHN-48-V1	exon	True
9	133748157	133748327	ABL1	ABL1	UHN-48-V1	exon	True
9	133748277	133748457	ABL1	ABL1	UHN-48-V1	exon	True
9	133750328	133750516	ABL1	ABL1	UHN-48-V1	exon	True
14	105246429	105246600	AKT1	AKT1	UHN-48-V1	exon	True
2	29432636	29432822	ALK	ALK	UHN-48-V1	exon	True
2	29443667	29443836	ALK	ALK	UHN-48-V1	exon	True
5	112173887	112174071	APC	APC	UHN-48-V1	exon	True
5	112174603	112174775	APC	APC	UHN-48-V1	exon	True
5	112175034	112175208	APC	APC	UHN-48-V1	exon	True
5	112175128	112175297	APC	APC	UHN-48-V1	exon	True
5	112175216	112175386	APC	APC	UHN-48-V1	exon	True
5	112175306	112175475	APC	APC	UHN-48-V1	exon	True
5	112175394	112175566	APC	APC	UHN-48-V1	exon	True
5	112175512	112175683	APC	APC	UHN-48-V1	exon	True
5	112175630	112175799	APC	APC	UHN-48-V1	exon	True
5	112175740	112175911	APC	APC	UHN-48-V1	exon	True
5	112175854	112176042	APC	APC	UHN-48-V1	exon	True
11	108117817	108117989	ATM	ATM	UHN-48-V1	exon	True
11	108119793	108119963	ATM	ATM	UHN-48-V1	exon	True
11	108123513	108123683	ATM	ATM	UHN-48-V1	exon	True
11	108137939	108138126	ATM	ATM	UHN-48-V1	exon	True
11	108155104	108155281	ATM	ATM	UHN-48-V1	exon	True
11	108170442	108170618	ATM	ATM	UHN-48-V1	exon	True
11	108172391	108172571	ATM	ATM	UHN-48-V1	exon	True
11	108173612	108173801	ATM	ATM	UHN-48-V1	exon	True
11	108180915	108181101	ATM	ATM	UHN-48-V1	exon	True
11	108200926	108201096	ATM	ATM	UHN-48-V1	exon	True
11	108204651	108204823	ATM	ATM	UHN-48-V1	exon	True
11	108205739	108205928	ATM	ATM	UHN-48-V1	exon	True
11	108206566	108206750	ATM	ATM	UHN-48-V1	exon	True
11	108218061	108218247	ATM	ATM	UHN-48-V1	exon	True
11	108225562	108225751	ATM	ATM	UHN-48-V1	exon	True
11	108236058	108236241	ATM	ATM	UHN-48-V1	exon	True
7	140453093	140453267	BRAF	BRAF	UHN-48-V1	exon	True
7	140481369	140481545	BRAF	BRAF	UHN-48-V1	exon	True
16	68835613	68835782	CDH1	CDH1	UHN-48-V1	exon	True
16	68846109	68846283	CDH1	CDH1	UHN-48-V1	exon	True
16	68847246	68847422	CDH1	CDH1	UHN-48-V1	exon	True
9	21971123	21971308	CDKN2A	CDKN2A	UHN-48-V1	exon	True
5	149433616	149433799	CSF1R	CSF1R	UHN-48-V1	exon	True
5	149453016	149453189	CSF1R	CSF1R	UHN-48-V1	exon	True
3	41266010	41266180	CTNNB1	CTNNB1	UHN-48-V1	exon	True
7	55211052	55211238	EGFR	EGFR	UHN-48-V1	exon	True
7	55221792	55221964	EGFR	EGFR	UHN-48-V1	exon	True
7	55233019	55233203	EGFR	EGFR	UHN-48-V1	exon	True
7	55241649	55241827	EGFR	EGFR	UHN-48-V1	exon	True
7	55242388	55242576	EGFR	EGFR	UHN-48-V1	exon	True
7	55248879	55249052	EGFR	EGFR	UHN-48-V1	exon	True
7	55249003	55249178	EGFR	EGFR	UHN-48-V1	exon	True
7	55259486	55259662	EGFR	EGFR	UHN-48-V1	exon	True
17	37880191	37880361	ERBB2	ERBB2	UHN-48-V1	exon	True
17	37880963	37881151	ERBB2	ERBB2	UHN-48-V1	exon	True
17	37881298	37881482	ERBB2	ERBB2	UHN-48-V1	exon	True
2	212288912	212289100	ERBB4	ERBB4	UHN-48-V1	exon	True
2	212530036	212530210	ERBB4	ERBB4	UHN-48-V1	exon	True
2	212576821	212576990	ERBB4	ERBB4	UHN-48-V1	exon	True
2	212578315	212578499	ERBB4	ERBB4	UHN-48-V1	exon	True
2	212587115	212587285	ERBB4	ERBB4	UHN-48-V1	exon	True
2	212589783	212589957	ERBB4	ERBB4	UHN-48-V1	exon	True
2	212652706	212652876	ERBB4	ERBB4	UHN-48-V1	exon	True
2	212812127	212812311	ERBB4	ERBB4	UHN-48-V1	exon	True
4	153245416	153245604	FBXW7	FBXW7	UHN-48-V1	exon	True
4	153247248	153247417	FBXW7	FBXW7	UHN-48-V1	exon	True
4	153249338	153249520	FBXW7	FBXW7	UHN-48-V1	exon	True
4	153250853	153251031	FBXW7	FBXW7	UHN-48-V1	exon	True
4	153258953	153259142	FBXW7	FBXW7	UHN-48-V1	exon	True
8	38282183	38282360	FGFR1	FGFR1	UHN-48-V1	exon	True
8	38285908	38286090	FGFR1	FGFR1	UHN-48-V1	exon	True
10	123258006	123258184	FGFR2	FGFR2	UHN-48-V1	exon	True
10	123274746	123274930	FGFR2	FGFR2	UHN-48-V1	exon	True
10	123279385	123279555	FGFR2	FGFR2	UHN-48-V1	exon	True
10	123279471	123279640	FGFR2	FGFR2	UHN-48-V1	exon	True
10	123279587	123279769	FGFR2	FGFR2	UHN-48-V1	exon	True
4	1803538	1803712	FGFR3	FGFR3	UHN-48-V1	exon	True
4	1806091	1806277	FGFR3	FGFR3	UHN-48-V1	exon	True
4	1807836	1808025	FGFR3	FGFR3	UHN-48-V1	exon	True
4	1808295	1808464	FGFR3	FGFR3	UHN-48-V1	exon	True
4	1808921	1809105	FGFR3	FGFR3	UHN-48-V1	exon	True
13	28592590	28592766	FLT3	FLT3	UHN-48-V1	exon	True
13	28602295	28602464	FLT3	FLT3	UHN-48-V1	exon	True
13	28608214	28608402	FLT3	FLT3	UHN-48-V1	exon	True
13	28610098	28610267	FLT3	FLT3	UHN-48-V1	exon	True
19	3114824	3115004	GNA11	GNA11	UHN-48-V1	exon	True
19	3114958	3115133	GNA11	GNA11	UHN-48-V1	exon	True
19	3118802	3118989	GNA11	GNA11	UHN-48-V1	exon	True
19	3119208	3119395	GNA11	GNA11	UHN-48-V1	exon	True
19	3120865	3121035	GNA11	GNA11	UHN-48-V1	exon	True
19	3120985	3121170	GNA11	GNA11	UHN-48-V1	exon	True
19	3121121	3121304	GNA11	GNA11	UHN-48-V1	exon	True
9	80336110	80336280	GNAQ	GNAQ	UHN-48-V1	exon	True
9	80336204	80336374	GNAQ	GNAQ	UHN-48-V1	exon	True
9	80336320	80336495	GNAQ	GNAQ	UHN-48-V1	exon	True
9	80343306	80343476	GNAQ	GNAQ	UHN-48-V1	exon	True
9	80343392	80343561	GNAQ	GNAQ	UHN-48-V1	exon	True
9	80343504	80343689	GNAQ	GNAQ	UHN-48-V1	exon	True
9	80409249	80409421	GNAQ	GNAQ	UHN-48-V1	exon	True
9	80409335	80409510	GNAQ	GNAQ	UHN-48-V1	exon	True
9	80409459	80409639	GNAQ	GNAQ	UHN-48-V1	exon	True
9	80412406	80412592	GNAQ	GNAQ	UHN-48-V1	exon	True
20	57484390	57484560	GNAS	GNAS	UHN-48-V1	exon	True
12	121431385	121431558	HNF1A	HNF1A	UHN-48-V1	exon	True
12	121432042	121432221	HNF1A	HNF1A	UHN-48-V1	exon	True
11	533843	534021	HRAS	HRAS	UHN-48-V1	exon	True
11	534251	534434	HRAS	HRAS	UHN-48-V1	exon	True
2	209113084	209113264	IDH1	IDH1	UHN-48-V1	exon	True
9	5073737	5073923	JAK2	JAK2	UHN-48-V1	exon	True
19	17945666	17945840	JAK3	JAK3	UHN-48-V1	exon	True
19	17947981	17948169	JAK3	JAK3	UHN-48-V1	exon	True
4	55945984	55946155	KDR	KDR	UHN-48-V1	exon	True
4	55946098	55946284	KDR	KDR	UHN-48-V1	exon	True
4	55953777	55953965	KDR	KDR	UHN-48-V1	exon	True
4	55955085	55955257	KDR	KDR	UHN-48-V1	exon	True
4	55960959	55961129	KDR	KDR	UHN-48-V1	exon	True
4	55962477	55962653	KDR	KDR	UHN-48-V1	exon	True
4	55972936	55973106	KDR	KDR	UHN-48-V1	exon	True
4	55979595	55979775	KDR	KDR	UHN-48-V1	exon	True
4	55980320	55980496	KDR	KDR	UHN-48-V1	exon	True
4	55561736	55561913	KIT	KIT	UHN-48-V1	exon	True
4	55592155	55592341	KIT	KIT	UHN-48-V1	exon	True
4	55593342	55593512	KIT	KIT	UHN-48-V1	exon	True
4	55593436	55593609	KIT	KIT	UHN-48-V1	exon	True
4	55593556	55593739	KIT	KIT	UHN-48-V1	exon	True
4	55594193	55594380	KIT	KIT	UHN-48-V1	exon	True
4	55595493	55595675	KIT	KIT	UHN-48-V1	exon	True
4	55597467	55597652	KIT	KIT	UHN-48-V1	exon	True
4	55599290	55599472	KIT	KIT	UHN-48-V1	exon	True
4	55602666	55602850	KIT	KIT	UHN-48-V1	exon	True
12	25378532	25378717	KRAS	KRAS	UHN-48-V1	exon	True
12	25380245	25380427	KRAS	KRAS	UHN-48-V1	exon	True
12	25398225	25398414	KRAS	KRAS	UHN-48-V1	exon	True
7	116339614	116339792	MET	MET	UHN-48-V1	exon	True
7	116340234	116340420	MET	MET	UHN-48-V1	exon	True
7	116411958	116412127	MET	MET	UHN-48-V1	exon	True
7	116417431	116417620	MET	MET	UHN-48-V1	exon	True
7	116423385	116423555	MET	MET	UHN-48-V1	exon	True
3	37067212	37067394	MLH1	MLH1	UHN-48-V1	exon	True
1	43814982	43815163	MPL	MPL	UHN-48-V1	exon	True
9	139397740	139397928	NOTCH1	NOTCH1	UHN-48-V1	exon	True
9	139399316	139399485	NOTCH1	NOTCH1	UHN-48-V1	exon	True
5	170837493	170837677	NPM1	NPM1	UHN-48-V1	exon	True
1	115256500	115256680	NRAS	NRAS	UHN-48-V1	exon	True
1	115258702	115258884	NRAS	NRAS	UHN-48-V1	exon	True
4	55140981	55141157	PDGFRA	PDGFRA	UHN-48-V1	exon	True
4	55144120	55144306	PDGFRA	PDGFRA	UHN-48-V1	exon	True
4	55144519	55144703	PDGFRA	PDGFRA	UHN-48-V1	exon	True
4	55152012	55152184	PDGFRA	PDGFRA	UHN-48-V1	exon	True
3	178916836	178917024	PIK3CA	PIK3CA	UHN-48-V1	exon	True
3	178921525	178921709	PIK3CA	PIK3CA	UHN-48-V1	exon	True
3	178927906	178928082	PIK3CA	PIK3CA	UHN-48-V1	exon	True
3	178936044	178936214	PIK3CA	PIK3CA	UHN-48-V1	exon	True
3	178938832	178939004	PIK3CA	PIK3CA	UHN-48-V1	exon	True
3	178951881	178952054	PIK3CA	PIK3CA	UHN-48-V1	exon	True
3	178951999	178952184	PIK3CA	PIK3CA	UHN-48-V1	exon	True
10	89624214	89624388	PTEN	PTEN	UHN-48-V1	exon	True
10	89685275	89685459	PTEN	PTEN	UHN-48-V1	exon	True
10	89711865	89712039	PTEN	PTEN	UHN-48-V1	exon	True
10	89717489	89717668	PTEN	PTEN	UHN-48-V1	exon	True
10	89717615	89717801	PTEN	PTEN	UHN-48-V1	exon	True
10	89720684	89720870	PTEN	PTEN	UHN-48-V1	exon	True
10	89720814	89720991	PTEN	PTEN	UHN-48-V1	exon	True
12	112888135	112888323	PTPN11	PTPN11	UHN-48-V1	exon	True
12	112926856	112927032	PTPN11	PTPN11	UHN-48-V1	exon	True
13	48919156	48919336	RB1	RB1	UHN-48-V1	exon	True
13	48923120	48923296	RB1	RB1	UHN-48-V1	exon	True
13	48942655	48942826	RB1	RB1	UHN-48-V1	exon	True
13	48955504	48955684	RB1	RB1	UHN-48-V1	exon	True
13	49027112	49027288	RB1	RB1	UHN-48-V1	exon	True
13	49033813	49033989	RB1	RB1	UHN-48-V1	exon	True
13	49037815	49037985	RB1	RB1	UHN-48-V1	exon	True
13	49039132	49039304	RB1	RB1	UHN-48-V1	exon	True
10	43609048	43609226	RET	RET	UHN-48-V1	exon	True
10	43609902	43610075	RET	RET	UHN-48-V1	exon	True
10	43613810	43613998	RET	RET	UHN-48-V1	exon	True
10	43615533	43615703	RET	RET	UHN-48-V1	exon	True
10	43617388	43617564	RET	RET	UHN-48-V1	exon	True
18	48575131	48575301	SMAD4	SMAD4	UHN-48-V1	exon	True
18	48581168	48581346	SMAD4	SMAD4	UHN-48-V1	exon	True
18	48584528	48584714	SMAD4	SMAD4	UHN-48-V1	exon	True
18	48586234	48586416	SMAD4	SMAD4	UHN-48-V1	exon	True
18	48591796	48591982	SMAD4	SMAD4	UHN-48-V1	exon	True
18	48593377	48593547	SMAD4	SMAD4	UHN-48-V1	exon	True
18	48602998	48603168	SMAD4	SMAD4	UHN-48-V1	exon	True
18	48604638	48604808	SMAD4	SMAD4	UHN-48-V1	exon	True
22	24133939	24134126	SMARCB1	SMARCB1	UHN-48-V1	exon	True
22	24143210	24143383	SMARCB1	SMARCB1	UHN-48-V1	exon	True
22	24145552	24145726	SMARCB1	SMARCB1	UHN-48-V1	exon	True
22	24176324	24176495	SMARCB1	SMARCB1	UHN-48-V1	exon	True
7	128845073	128845257	SMO	SMO	UHN-48-V1	exon	True
7	128846010	128846194	SMO	SMO	UHN-48-V1	exon	True
7	128846348	128846536	SMO	SMO	UHN-48-V1	exon	True
7	128850311	128850499	SMO	SMO	UHN-48-V1	exon	True
7	128851563	128851734	SMO	SMO	UHN-48-V1	exon	True
20	36031734	36031923	SRC	SRC	UHN-48-V1	exon	True
19	1206993	1207169	STK11	STK11	UHN-48-V1	exon	True
19	1220459	1220638	STK11	STK11	UHN-48-V1	exon	True
19	1221232	1221407	STK11	STK11	UHN-48-V1	exon	True
19	1223035	1223221	STK11	STK11	UHN-48-V1	exon	True
17	7573977	7574147	TP53	TP53	UHN-48-V1	exon	True
17	7576996	7577166	TP53	TP53	UHN-48-V1	exon	True
17	7577495	7577683	TP53	TP53	UHN-48-V1	exon	True
17	7578064	7578234	TP53	TP53	UHN-48-V1	exon	True
17	7578156	7578325	TP53	TP53	UHN-48-V1	exon	True
17	7578246	7578415	TP53	TP53	UHN-48-V1	exon	True
17	7578346	7578515	TP53	TP53	UHN-48-V1	exon	True
17	7578468	7578645	TP53	TP53	UHN-48-V1	exon	True
17	7579324	7579507	TP53	TP53	UHN-48-V1	exon	True
17	7579852	7580032	TP53	TP53	UHN-48-V1	exon	True
3	10183769	10183952	VHL	VHL	UHN-48-V1	exon	True
3	10188217	10188401	VHL	VHL	UHN-48-V1	exon	True
3	10191450	10191634	VHL	VHL	UHN-48-V1	exon	True
9	133738294	133738378	ABL1	ABL1	UHN-50-V2	exon	True
9	133747442	133747530	ABL1	ABL1	UHN-50-V2	exon	True
9	133748279	133748417	ABL1	ABL1	UHN-50-V2	exon	True
9	133750307	133750405	ABL1	ABL1	UHN-50-V2	exon	True
14	105241433	105241519	AKT1	AKT1	UHN-50-V2	exon	True
14	105246445	105246583	AKT1	AKT1	UHN-50-V2	exon	True
2	29432572	29432680	ALK	ALK	UHN-50-V2	exon	True
2	29443607	29443729	ALK	ALK	UHN-50-V2	exon	True
5	112173871	112173962	APC	APC	UHN-50-V2	exon	True
5	112174557	112174666	APC	APC	UHN-50-V2	exon	True
5	112175143	112175268	APC	APC	UHN-50-V2	exon	True
5	112175315	112175443	APC	APC	UHN-50-V2	exon	True
5	112175567	112175703	APC	APC	UHN-50-V2	exon	True
5	112175740	112175862	APC	APC	UHN-50-V2	exon	True
5	112175920	112176035	APC	APC	UHN-50-V2	exon	True
11	108117765	108117865	ATM	ATM	UHN-50-V2	exon	True
11	108119815	108119891	ATM	ATM	UHN-50-V2	exon	True
11	108123515	108123618	ATM	ATM	UHN-50-V2	exon	True
11	108137931	108138025	ATM	ATM	UHN-50-V2	exon	True
11	108155083	108155180	ATM	ATM	UHN-50-V2	exon	True
11	108170456	108170556	ATM	ATM	UHN-50-V2	exon	True
11	108172362	108172467	ATM	ATM	UHN-50-V2	exon	True
11	108173630	108173703	ATM	ATM	UHN-50-V2	exon	True
11	108180902	108180960	ATM	ATM	UHN-50-V2	exon	True
11	108200915	108200993	ATM	ATM	UHN-50-V2	exon	True
11	108204634	108204684	ATM	ATM	UHN-50-V2	exon	True
11	108205731	108205816	ATM	ATM	UHN-50-V2	exon	True
11	108206523	108206628	ATM	ATM	UHN-50-V2	exon	True
11	108218015	108218144	ATM	ATM	UHN-50-V2	exon	True
11	108225549	108225632	ATM	ATM	UHN-50-V2	exon	True
11	108236042	108236140	ATM	ATM	UHN-50-V2	exon	True
11	108236186	108236285	ATM	ATM	UHN-50-V2	exon	True
7	140453102	140453221	BRAF	BRAF	UHN-50-V2	exon	True
7	140481391	140481515	BRAF	BRAF	UHN-50-V2	exon	True
16	68835602	68835697	CDH1	CDH1	UHN-50-V2	exon	True
16	68846024	68846151	CDH1	CDH1	UHN-50-V2	exon	True
16	68847199	68847302	CDH1	CDH1	UHN-50-V2	exon	True
9	21970940	21971066	CDKN2A	CDKN2A	UHN-50-V2	exon	True
9	21971090	21971219	CDKN2A	CDKN2A	UHN-50-V2	exon	True
5	149433593	149433692	CSF1R	CSF1R	UHN-50-V2	exon	True
5	149452991	149453073	CSF1R	CSF1R	UHN-50-V2	exon	True
3	41266029	41266147	CTNNB1	CTNNB1	UHN-50-V2	exon	True
7	55211044	55211126	EGFR	EGFR	UHN-50-V2	exon	True
7	55221792	55221919	EGFR	EGFR	UHN-50-V2	exon	True
7	55232962	55233053	EGFR	EGFR	UHN-50-V2	exon	True
7	55241635	55241729	EGFR	EGFR	UHN-50-V2	exon	True
7	55242411	55242540	EGFR	EGFR	UHN-50-V2	exon	True
7	55248965	55249090	EGFR	EGFR	UHN-50-V2	exon	True
7	55249122	55249245	EGFR	EGFR	UHN-50-V2	exon	True
7	55259507	55259628	EGFR	EGFR	UHN-50-V2	exon	True
17	37880212	37880340	ERBB2	ERBB2	UHN-50-V2	exon	True
17	37880953	37881061	ERBB2	ERBB2	UHN-50-V2	exon	True
17	37881324	37881453	ERBB2	ERBB2	UHN-50-V2	exon	True
2	212288904	212288990	ERBB4	ERBB4	UHN-50-V2	exon	True
2	212530051	212530180	ERBB4	ERBB4	UHN-50-V2	exon	True
2	212576799	212576910	ERBB4	ERBB4	UHN-50-V2	exon	True
2	212578288	212578415	ERBB4	ERBB4	UHN-50-V2	exon	True
2	212587133	212587239	ERBB4	ERBB4	UHN-50-V2	exon	True
2	212589764	212589867	ERBB4	ERBB4	UHN-50-V2	exon	True
2	212652719	212652806	ERBB4	ERBB4	UHN-50-V2	exon	True
2	212812075	212812169	ERBB4	ERBB4	UHN-50-V2	exon	True
7	148508706	148508791	EZH2	EZH2	UHN-50-V2	exon	True
4	153245410	153245492	FBXW7	FBXW7	UHN-50-V2	exon	True
4	153247277	153247369	FBXW7	FBXW7	UHN-50-V2	exon	True
4	153249355	153249477	FBXW7	FBXW7	UHN-50-V2	exon	True
4	153250852	153250926	FBXW7	FBXW7	UHN-50-V2	exon	True
4	153258901	153259023	FBXW7	FBXW7	UHN-50-V2	exon	True
8	38282140	38282254	FGFR1	FGFR1	UHN-50-V2	exon	True
8	38285851	38285975	FGFR1	FGFR1	UHN-50-V2	exon	True
10	123257952	123258045	FGFR2	FGFR2	UHN-50-V2	exon	True
10	123274721	123274835	FGFR2	FGFR2	UHN-50-V2	exon	True
10	123279417	123279544	FGFR2	FGFR2	UHN-50-V2	exon	True
10	123279607	123279713	FGFR2	FGFR2	UHN-50-V2	exon	True
4	1803551	1803653	FGFR3	FGFR3	UHN-50-V2	exon	True
4	1806081	1806187	FGFR3	FGFR3	UHN-50-V2	exon	True
4	1807833	1807930	FGFR3	FGFR3	UHN-50-V2	exon	True
4	1808311	1808399	FGFR3	FGFR3	UHN-50-V2	exon	True
4	1808881	1809006	FGFR3	FGFR3	UHN-50-V2	exon	True
13	28592579	28592663	FLT3	FLT3	UHN-50-V2	exon	True
13	28602275	28602379	FLT3	FLT3	UHN-50-V2	exon	True
13	28608227	28608348	FLT3	FLT3	UHN-50-V2	exon	True
13	28610093	28610184	FLT3	FLT3	UHN-50-V2	exon	True
19	3118881	3118973	GNA11	GNA11	UHN-50-V2	exon	True
9	80409375	80409498	GNAQ	GNAQ	UHN-50-V2	exon	True
20	57484396	57484504	GNAS	GNAS	UHN-50-V2	exon	True
20	57484562	57484672	GNAS	GNAS	UHN-50-V2	exon	True
12	121431371	121431459	HNF1A	HNF1A	UHN-50-V2	exon	True
12	121432010	121432099	HNF1A	HNF1A	UHN-50-V2	exon	True
11	533812	533930	HRAS	HRAS	UHN-50-V2	exon	True
11	534220	534308	HRAS	HRAS	UHN-50-V2	exon	True
2	209113103	209113206	IDH1	IDH1	UHN-50-V2	exon	True
15	90631824	90631954	IDH2	IDH2	UHN-50-V2	exon	True
9	5073729	5073857	JAK2	JAK2	UHN-50-V2	exon	True
19	17945616	17945734	JAK3	JAK3	UHN-50-V2	exon	True
19	17947986	17948074	JAK3	JAK3	UHN-50-V2	exon	True
19	17954134	17954225	JAK3	JAK3	UHN-50-V2	exon	True
4	55946088	55946208	KDR	KDR	UHN-50-V2	exon	True
4	55946250	55946371	KDR	KDR	UHN-50-V2	exon	True
4	55953775	55953860	KDR	KDR	UHN-50-V2	exon	True
4	55955078	55955168	KDR	KDR	UHN-50-V2	exon	True
4	55960976	55961059	KDR	KDR	UHN-50-V2	exon	True
4	55962444	55962548	KDR	KDR	UHN-50-V2	exon	True
4	55972952	55973071	KDR	KDR	UHN-50-V2	exon	True
4	55979574	55979655	KDR	KDR	UHN-50-V2	exon	True
4	55980238	55980359	KDR	KDR	UHN-50-V2	exon	True
4	55561654	55561784	KIT	KIT	UHN-50-V2	exon	True
4	55592157	55592246	KIT	KIT	UHN-50-V2	exon	True
4	55593417	55593513	KIT	KIT	UHN-50-V2	exon	True
4	55593575	55593695	KIT	KIT	UHN-50-V2	exon	True
4	55594170	55594279	KIT	KIT	UHN-50-V2	exon	True
4	55595496	55595562	KIT	KIT	UHN-50-V2	exon	True
4	55597436	55597524	KIT	KIT	UHN-50-V2	exon	True
4	55599280	55599358	KIT	KIT	UHN-50-V2	exon	True
4	55602673	55602751	KIT	KIT	UHN-50-V2	exon	True
12	25378549	25378658	KRAS	KRAS	UHN-50-V2	exon	True
12	25380260	25380364	KRAS	KRAS	UHN-50-V2	exon	True
12	25398186	25398304	KRAS	KRAS	UHN-50-V2	exon	True
7	116339615	116339701	MET	MET	UHN-50-V2	exon	True
7	116340155	116340270	MET	MET	UHN-50-V2	exon	True
7	116403131	116403251	MET	MET	UHN-50-V2	exon	True
7	116411878	116411997	MET	MET	UHN-50-V2	exon	True
7	116417427	116417542	MET	MET	UHN-50-V2	exon	True
7	116423407	116423492	MET	MET	UHN-50-V2	exon	True
3	37067207	37067333	MLH1	MLH1	UHN-50-V2	exon	True
1	43814968	43815086	MPL	MPL	UHN-50-V2	exon	True
9	139390764	139390885	NOTCH1	NOTCH1	UHN-50-V2	exon	True
9	139397762	139397879	NOTCH1	NOTCH1	UHN-50-V2	exon	True
9	139399337	139399447	NOTCH1	NOTCH1	UHN-50-V2	exon	True
5	170837501	170837616	NPM1	NPM1	UHN-50-V2	exon	True
1	115252185	115252269	NRAS	NRAS	UHN-50-V2	exon	True
1	115256504	115256584	NRAS	NRAS	UHN-50-V2	exon	True
1	115258689	115258774	NRAS	NRAS	UHN-50-V2	exon	True
4	55140981	55141103	PDGFRA	PDGFRA	UHN-50-V2	exon	True
4	55144101	55144195	PDGFRA	PDGFRA	UHN-50-V2	exon	True
4	55144538	55144653	PDGFRA	PDGFRA	UHN-50-V2	exon	True
4	55152024	55152154	PDGFRA	PDGFRA	UHN-50-V2	exon	True
3	178916775	178916881	PIK3CA	PIK3CA	UHN-50-V2	exon	True
3	178916931	178917035	PIK3CA	PIK3CA	UHN-50-V2	exon	True
3	178921464	178921570	PIK3CA	PIK3CA	UHN-50-V2	exon	True
3	178927405	178927525	PIK3CA	PIK3CA	UHN-50-V2	exon	True
3	178927901	178927986	PIK3CA	PIK3CA	UHN-50-V2	exon	True
3	178928069	178928160	PIK3CA	PIK3CA	UHN-50-V2	exon	True
3	178936023	178936105	PIK3CA	PIK3CA	UHN-50-V2	exon	True
3	178938787	178938918	PIK3CA	PIK3CA	UHN-50-V2	exon	True
3	178947818	178947896	PIK3CA	PIK3CA	UHN-50-V2	exon	True
3	178951996	178952097	PIK3CA	PIK3CA	UHN-50-V2	exon	True
3	178952140	178952237	PIK3CA	PIK3CA	UHN-50-V2	exon	True
10	89624207	89624300	PTEN	PTEN	UHN-50-V2	exon	True
10	89685258	89685374	PTEN	PTEN	UHN-50-V2	exon	True
10	89692813	89692920	PTEN	PTEN	UHN-50-V2	exon	True
10	89711804	89711932	PTEN	PTEN	UHN-50-V2	exon	True
10	89717503	89717620	PTEN	PTEN	UHN-50-V2	exon	True
10	89717666	89717780	PTEN	PTEN	UHN-50-V2	exon	True
10	89720695	89720747	PTEN	PTEN	UHN-50-V2	exon	True
10	89720784	89720900	PTEN	PTEN	UHN-50-V2	exon	True
12	112888118	112888228	PTPN11	PTPN11	UHN-50-V2	exon	True
12	112926835	112926961	PTPN11	PTPN11	UHN-50-V2	exon	True
13	48919223	48919312	RB1	RB1	UHN-50-V2	exon	True
13	48923139	48923255	RB1	RB1	UHN-50-V2	exon	True
13	48941601	48941724	RB1	RB1	UHN-50-V2	exon	True
13	48942597	48942711	RB1	RB1	UHN-50-V2	exon	True
13	48953753	48953874	RB1	RB1	UHN-50-V2	exon	True
13	48955525	48955605	RB1	RB1	UHN-50-V2	exon	True
13	49027105	49027178	RB1	RB1	UHN-50-V2	exon	True
13	49033827	49033934	RB1	RB1	UHN-50-V2	exon	True
13	49037846	49037932	RB1	RB1	UHN-50-V2	exon	True
13	49039149	49039232	RB1	RB1	UHN-50-V2	exon	True
10	43609066	43609182	RET	RET	UHN-50-V2	exon	True
10	43609874	43610010	RET	RET	UHN-50-V2	exon	True
10	43613794	43613893	RET	RET	UHN-50-V2	exon	True
10	43615546	43615687	RET	RET	UHN-50-V2	exon	True
10	43617314	43617433	RET	RET	UHN-50-V2	exon	True
18	48575099	48575213	SMAD4	SMAD4	UHN-50-V2	exon	True
18	48575556	48575677	SMAD4	SMAD4	UHN-50-V2	exon	True
18	48581190	48581302	SMAD4	SMAD4	UHN-50-V2	exon	True
18	48584551	48584678	SMAD4	SMAD4	UHN-50-V2	exon	True
18	48586251	48586361	SMAD4	SMAD4	UHN-50-V2	exon	True
18	48591814	48591931	SMAD4	SMAD4	UHN-50-V2	exon	True
18	48593399	48593519	SMAD4	SMAD4	UHN-50-V2	exon	True
18	48603028	48603119	SMAD4	SMAD4	UHN-50-V2	exon	True
18	48604658	48604774	SMAD4	SMAD4	UHN-50-V2	exon	True
22	24133953	24134064	SMARCB1	SMARCB1	UHN-50-V2	exon	True
22	24143200	24143311	SMARCB1	SMARCB1	UHN-50-V2	exon	True
22	24145477	24145598	SMARCB1	SMARCB1	UHN-50-V2	exon	True
22	24176259	24176391	SMARCB1	SMARCB1	UHN-50-V2	exon	True
7	128845063	128845188	SMO	SMO	UHN-50-V2	exon	True
7	128845957	128846063	SMO	SMO	UHN-50-V2	exon	True
7	128846337	128846419	SMO	SMO	UHN-50-V2	exon	True
7	128850269	128850363	SMO	SMO	UHN-50-V2	exon	True
7	128851499	128851612	SMO	SMO	UHN-50-V2	exon	True
20	36031666	36031769	SRC	SRC	UHN-50-V2	exon	True
19	1206977	1207104	STK11	STK11	UHN-50-V2	exon	True
19	1220310	1220450	STK11	STK11	UHN-50-V2	exon	True
19	1220480	1220603	STK11	STK11	UHN-50-V2	exon	True
19	1221236	1221332	STK11	STK11	UHN-50-V2	exon	True
19	1223014	1223144	STK11	STK11	UHN-50-V2	exon	True
17	7573923	7574035	TP53	TP53	UHN-50-V2	exon	True
17	7577015	7577151	TP53	TP53	UHN-50-V2	exon	True
17	7577508	7577612	TP53	TP53	UHN-50-V2	exon	True
17	7578180	7578298	TP53	TP53	UHN-50-V2	exon	True
17	7578352	7578483	TP53	TP53	UHN-50-V2	exon	True
17	7578516	7578601	TP53	TP53	UHN-50-V2	exon	True
17	7579350	7579485	TP53	TP53	UHN-50-V2	exon	True
17	7579853	7579960	TP53	TP53	UHN-50-V2	exon	True
3	10183765	10183854	VHL	VHL	UHN-50-V2	exon	True
3	10188186	10188306	VHL	VHL	UHN-50-V2	exon	True
3	10191418	10191527	VHL	VHL	UHN-50-V2	exon	True
9	133738294	133738378	ABL1	ABL1	GRCC-CHP2	exon	True
9	133747442	133747530	ABL1	ABL1	GRCC-CHP2	exon	True
9	133748279	133748417	ABL1	ABL1	GRCC-CHP2	exon	True
9	133750307	133750405	ABL1	ABL1	GRCC-CHP2	exon	True
14	105241433	105241519	AKT1	AKT1	GRCC-CHP2	exon	True
14	105246445	105246583	AKT1	AKT1	GRCC-CHP2	exon	True
2	29432572	29432680	ALK	ALK	GRCC-CHP2	exon	True
2	29443607	29443729	ALK	ALK	GRCC-CHP2	exon	True
5	112173871	112173962	APC	APC	GRCC-CHP2	exon	True
5	112174557	112174666	APC	APC	GRCC-CHP2	exon	True
5	112175143	112175268	APC	APC	GRCC-CHP2	exon	True
5	112175315	112175443	APC	APC	GRCC-CHP2	exon	True
5	112175567	112175703	APC	APC	GRCC-CHP2	exon	True
5	112175740	112175862	APC	APC	GRCC-CHP2	exon	True
5	112175920	112176035	APC	APC	GRCC-CHP2	exon	True
11	108117765	108117865	ATM	ATM	GRCC-CHP2	exon	True
11	108119815	108119891	ATM	ATM	GRCC-CHP2	exon	True
11	108123515	108123618	ATM	ATM	GRCC-CHP2	exon	True
11	108137931	108138025	ATM	ATM	GRCC-CHP2	exon	True
11	108155083	108155180	ATM	ATM	GRCC-CHP2	exon	True
11	108170456	108170556	ATM	ATM	GRCC-CHP2	exon	True
11	108172362	108172467	ATM	ATM	GRCC-CHP2	exon	True
11	108173630	108173703	ATM	ATM	GRCC-CHP2	exon	True
11	108180902	108180960	ATM	ATM	GRCC-CHP2	exon	True
11	108200915	108200993	ATM	ATM	GRCC-CHP2	exon	True
11	108204634	108204684	ATM	ATM	GRCC-CHP2	exon	True
11	108205731	108205816	ATM	ATM	GRCC-CHP2	exon	True
11	108206523	108206628	ATM	ATM	GRCC-CHP2	exon	True
11	108218015	108218144	ATM	ATM	GRCC-CHP2	exon	True
11	108225549	108225632	ATM	ATM	GRCC-CHP2	exon	True
11	108236042	108236140	ATM	ATM	GRCC-CHP2	exon	True
11	108236186	108236285	ATM	ATM	GRCC-CHP2	exon	True
7	140453102	140453221	BRAF	BRAF	GRCC-CHP2	exon	True
7	140481391	140481515	BRAF	BRAF	GRCC-CHP2	exon	True
16	68835602	68835697	CDH1	CDH1	GRCC-CHP2	exon	True
16	68846024	68846151	CDH1	CDH1	GRCC-CHP2	exon	True
16	68847199	68847302	CDH1	CDH1	GRCC-CHP2	exon	True
9	21970940	21971066	CDKN2A	CDKN2A	GRCC-CHP2	exon	True
9	21971090	21971219	CDKN2A	CDKN2A	GRCC-CHP2	exon	True
5	149433593	149433692	CSF1R	CSF1R	GRCC-CHP2	exon	True
5	149452991	149453073	CSF1R	CSF1R	GRCC-CHP2	exon	True
3	41266029	41266147	CTNNB1	CTNNB1	GRCC-CHP2	exon	True
7	55211044	55211126	EGFR	EGFR	GRCC-CHP2	exon	True
7	55221792	55221919	EGFR	EGFR	GRCC-CHP2	exon	True
7	55232962	55233053	EGFR	EGFR	GRCC-CHP2	exon	True
7	55241635	55241729	EGFR	EGFR	GRCC-CHP2	exon	True
7	55242411	55242540	EGFR	EGFR	GRCC-CHP2	exon	True
7	55248965	55249090	EGFR	EGFR	GRCC-CHP2	exon	True
7	55249122	55249245	EGFR	EGFR	GRCC-CHP2	exon	True
7	55259507	55259628	EGFR	EGFR	GRCC-CHP2	exon	True
17	37880212	37880340	ERBB2	ERBB2	GRCC-CHP2	exon	True
17	37880953	37881061	ERBB2	ERBB2	GRCC-CHP2	exon	True
17	37881324	37881453	ERBB2	ERBB2	GRCC-CHP2	exon	True
2	212288904	212288990	ERBB4	ERBB4	GRCC-CHP2	exon	True
2	212530051	212530180	ERBB4	ERBB4	GRCC-CHP2	exon	True
2	212576799	212576910	ERBB4	ERBB4	GRCC-CHP2	exon	True
2	212578288	212578415	ERBB4	ERBB4	GRCC-CHP2	exon	True
2	212587133	212587239	ERBB4	ERBB4	GRCC-CHP2	exon	True
2	212589764	212589867	ERBB4	ERBB4	GRCC-CHP2	exon	True
2	212652719	212652806	ERBB4	ERBB4	GRCC-CHP2	exon	True
2	212812075	212812169	ERBB4	ERBB4	GRCC-CHP2	exon	True
7	148508706	148508791	EZH2	EZH2	GRCC-CHP2	exon	True
4	153245410	153245492	FBXW7	FBXW7	GRCC-CHP2	exon	True
4	153247277	153247369	FBXW7	FBXW7	GRCC-CHP2	exon	True
4	153249355	153249477	FBXW7	FBXW7	GRCC-CHP2	exon	True
4	153250852	153250926	FBXW7	FBXW7	GRCC-CHP2	exon	True
4	153258901	153259023	FBXW7	FBXW7	GRCC-CHP2	exon	True
8	38282140	38282254	FGFR1	FGFR1	GRCC-CHP2	exon	True
8	38285851	38285975	FGFR1	FGFR1	GRCC-CHP2	exon	True
10	123257952	123258045	FGFR2	FGFR2	GRCC-CHP2	exon	True
10	123274721	123274835	FGFR2	FGFR2	GRCC-CHP2	exon	True
10	123279417	123279544	FGFR2	FGFR2	GRCC-CHP2	exon	True
10	123279607	123279713	FGFR2	FGFR2	GRCC-CHP2	exon	True
4	1803551	1803653	FGFR3	FGFR3	GRCC-CHP2	exon	True
4	1806081	1806187	FGFR3	FGFR3	GRCC-CHP2	exon	True
4	1807833	1807930	FGFR3	FGFR3	GRCC-CHP2	exon	True
4	1808311	1808399	FGFR3	FGFR3	GRCC-CHP2	exon	True
4	1808881	1809006	FGFR3	FGFR3	GRCC-CHP2	exon	True
13	28592579	28592663	FLT3	FLT3	GRCC-CHP2	exon	True
13	28602275	28602379	FLT3	FLT3	GRCC-CHP2	exon	True
13	28608227	28608348	FLT3	FLT3	GRCC-CHP2	exon	True
13	28610093	28610184	FLT3	FLT3	GRCC-CHP2	exon	True
19	3118881	3118973	GNA11	GNA11	GRCC-CHP2	exon	True
9	80409375	80409498	GNAQ	GNAQ	GRCC-CHP2	exon	True
20	57484396	57484504	GNAS	GNAS	GRCC-CHP2	exon	True
20	57484562	57484672	GNAS	GNAS	GRCC-CHP2	exon	True
12	121431371	121431459	HNF1A	HNF1A	GRCC-CHP2	exon	True
12	121432010	121432099	HNF1A	HNF1A	GRCC-CHP2	exon	True
11	533812	533930	HRAS	HRAS	GRCC-CHP2	exon	True
11	534220	534308	HRAS	HRAS	GRCC-CHP2	exon	True
2	209113103	209113206	IDH1	IDH1	GRCC-CHP2	exon	True
15	90631824	90631954	IDH2	IDH2	GRCC-CHP2	exon	True
9	5073729	5073857	JAK2	JAK2	GRCC-CHP2	exon	True
19	17945616	17945734	JAK3	JAK3	GRCC-CHP2	exon	True
19	17947986	17948074	JAK3	JAK3	GRCC-CHP2	exon	True
19	17954134	17954225	JAK3	JAK3	GRCC-CHP2	exon	True
4	55946088	55946208	KDR	KDR	GRCC-CHP2	exon	True
4	55946250	55946371	KDR	KDR	GRCC-CHP2	exon	True
4	55953775	55953860	KDR	KDR	GRCC-CHP2	exon	True
4	55955078	55955168	KDR	KDR	GRCC-CHP2	exon	True
4	55960976	55961059	KDR	KDR	GRCC-CHP2	exon	True
4	55962444	55962548	KDR	KDR	GRCC-CHP2	exon	True
4	55972952	55973071	KDR	KDR	GRCC-CHP2	exon	True
4	55979574	55979655	KDR	KDR	GRCC-CHP2	exon	True
4	55980238	55980359	KDR	KDR	GRCC-CHP2	exon	True
4	55561654	55561784	KIT	KIT	GRCC-CHP2	exon	True
4	55592157	55592246	KIT	KIT	GRCC-CHP2	exon	True
4	55593417	55593513	KIT	KIT	GRCC-CHP2	exon	True
4	55593575	55593695	KIT	KIT	GRCC-CHP2	exon	True
4	55594170	55594279	KIT	KIT	GRCC-CHP2	exon	True
4	55595496	55595562	KIT	KIT	GRCC-CHP2	exon	True
4	55597436	55597524	KIT	KIT	GRCC-CHP2	exon	True
4	55599280	55599358	KIT	KIT	GRCC-CHP2	exon	True
4	55602673	55602751	KIT	KIT	GRCC-CHP2	exon	True
12	25378549	25378658	KRAS	KRAS	GRCC-CHP2	exon	True
12	25380260	25380364	KRAS	KRAS	GRCC-CHP2	exon	True
12	25398186	25398304	KRAS	KRAS	GRCC-CHP2	exon	True
7	116339615	116339701	MET	MET	GRCC-CHP2	exon	True
7	116340155	116340270	MET	MET	GRCC-CHP2	exon	True
7	116403131	116403251	MET	MET	GRCC-CHP2	exon	True
7	116411878	116411997	MET	MET	GRCC-CHP2	exon	True
7	116417427	116417542	MET	MET	GRCC-CHP2	exon	True
7	116423407	116423492	MET	MET	GRCC-CHP2	exon	True
3	37067207	37067333	MLH1	MLH1	GRCC-CHP2	exon	True
1	43814968	43815086	MPL	MPL	GRCC-CHP2	exon	True
9	139390764	139390885	NOTCH1	NOTCH1	GRCC-CHP2	exon	True
9	139397762	139397879	NOTCH1	NOTCH1	GRCC-CHP2	exon	True
9	139399337	139399447	NOTCH1	NOTCH1	GRCC-CHP2	exon	True
5	170837501	170837616	NPM1	NPM1	GRCC-CHP2	exon	True
1	115252185	115252269	NRAS	NRAS	GRCC-CHP2	exon	True
1	115256504	115256584	NRAS	NRAS	GRCC-CHP2	exon	True
1	115258689	115258774	NRAS	NRAS	GRCC-CHP2	exon	True
4	55140981	55141103	PDGFRA	PDGFRA	GRCC-CHP2	exon	True
4	55144101	55144195	PDGFRA	PDGFRA	GRCC-CHP2	exon	True
4	55144538	55144653	PDGFRA	PDGFRA	GRCC-CHP2	exon	True
4	55152024	55152154	PDGFRA	PDGFRA	GRCC-CHP2	exon	True
3	178916775	178916881	PIK3CA	PIK3CA	GRCC-CHP2	exon	True
3	178916931	178917035	PIK3CA	PIK3CA	GRCC-CHP2	exon	True
3	178921464	178921570	PIK3CA	PIK3CA	GRCC-CHP2	exon	True
3	178927405	178927525	PIK3CA	PIK3CA	GRCC-CHP2	exon	True
3	178927901	178927986	PIK3CA	PIK3CA	GRCC-CHP2	exon	True
3	178928069	178928160	PIK3CA	PIK3CA	GRCC-CHP2	exon	True
3	178936023	178936105	PIK3CA	PIK3CA	GRCC-CHP2	exon	True
3	178938787	178938918	PIK3CA	PIK3CA	GRCC-CHP2	exon	True
3	178947818	178947896	PIK3CA	PIK3CA	GRCC-CHP2	exon	True
3	178951996	178952097	PIK3CA	PIK3CA	GRCC-CHP2	exon	True
3	178952140	178952237	PIK3CA	PIK3CA	GRCC-CHP2	exon	True
10	89624207	89624300	PTEN	PTEN	GRCC-CHP2	exon	True
10	89685258	89685374	PTEN	PTEN	GRCC-CHP2	exon	True
10	89692813	89692920	PTEN	PTEN	GRCC-CHP2	exon	True
10	89711804	89711932	PTEN	PTEN	GRCC-CHP2	exon	True
10	89717503	89717620	PTEN	PTEN	GRCC-CHP2	exon	True
10	89717666	89717780	PTEN	PTEN	GRCC-CHP2	exon	True
10	89720695	89720747	PTEN	PTEN	GRCC-CHP2	exon	True
10	89720784	89720900	PTEN	PTEN	GRCC-CHP2	exon	True
12	112888118	112888228	PTPN11	PTPN11	GRCC-CHP2	exon	True
12	112926835	112926961	PTPN11	PTPN11	GRCC-CHP2	exon	True
13	48919223	48919312	RB1	RB1	GRCC-CHP2	exon	True
13	48923139	48923255	RB1	RB1	GRCC-CHP2	exon	True
13	48941601	48941724	RB1	RB1	GRCC-CHP2	exon	True
13	48942597	48942711	RB1	RB1	GRCC-CHP2	exon	True
13	48953753	48953874	RB1	RB1	GRCC-CHP2	exon	True
13	48955525	48955605	RB1	RB1	GRCC-CHP2	exon	True
13	49027105	49027178	RB1	RB1	GRCC-CHP2	exon	True
13	49033827	49033934	RB1	RB1	GRCC-CHP2	exon	True
13	49037846	49037932	RB1	RB1	GRCC-CHP2	exon	True
13	49039149	49039232	RB1	RB1	GRCC-CHP2	exon	True
10	43609066	43609182	RET	RET	GRCC-CHP2	exon	True
10	43609874	43610010	RET	RET	GRCC-CHP2	exon	True
10	43613794	43613893	RET	RET	GRCC-CHP2	exon	True
10	43615546	43615687	RET	RET	GRCC-CHP2	exon	True
10	43617314	43617433	RET	RET	GRCC-CHP2	exon	True
18	48575099	48575213	SMAD4	SMAD4	GRCC-CHP2	exon	True
18	48575556	48575677	SMAD4	SMAD4	GRCC-CHP2	exon	True
18	48581190	48581302	SMAD4	SMAD4	GRCC-CHP2	exon	True
18	48584551	48584678	SMAD4	SMAD4	GRCC-CHP2	exon	True
18	48586251	48586361	SMAD4	SMAD4	GRCC-CHP2	exon	True
18	48591814	48591931	SMAD4	SMAD4	GRCC-CHP2	exon	True
18	48593399	48593519	SMAD4	SMAD4	GRCC-CHP2	exon	True
18	48603028	48603119	SMAD4	SMAD4	GRCC-CHP2	exon	True
18	48604658	48604774	SMAD4	SMAD4	GRCC-CHP2	exon	True
22	24133953	24134064	SMARCB1	SMARCB1	GRCC-CHP2	exon	True
22	24143200	24143311	SMARCB1	SMARCB1	GRCC-CHP2	exon	True
22	24145477	24145598	SMARCB1	SMARCB1	GRCC-CHP2	exon	True
22	24176259	24176391	SMARCB1	SMARCB1	GRCC-CHP2	exon	True
7	128845063	128845188	SMO	SMO	GRCC-CHP2	exon	True
7	128845957	128846063	SMO	SMO	GRCC-CHP2	exon	True
7	128846337	128846419	SMO	SMO	GRCC-CHP2	exon	True
7	128850269	128850363	SMO	SMO	GRCC-CHP2	exon	True
7	128851499	128851612	SMO	SMO	GRCC-CHP2	exon	True
20	36031666	36031769	SRC	SRC	GRCC-CHP2	exon	True
19	1206977	1207104	STK11	STK11	GRCC-CHP2	exon	True
19	1220310	1220450	STK11	STK11	GRCC-CHP2	exon	True
19	1220480	1220603	STK11	STK11	GRCC-CHP2	exon	True
19	1221236	1221332	STK11	STK11	GRCC-CHP2	exon	True
19	1223014	1223144	STK11	STK11	GRCC-CHP2	exon	True
17	7573923	7574035	TP53	TP53	GRCC-CHP2	exon	True
17	7577015	7577151	TP53	TP53	GRCC-CHP2	exon	True
17	7577508	7577612	TP53	TP53	GRCC-CHP2	exon	True
17	7578180	7578298	TP53	TP53	GRCC-CHP2	exon	True
17	7578352	7578483	TP53	TP53	GRCC-CHP2	exon	True
17	7578516	7578601	TP53	TP53	GRCC-CHP2	exon	True
17	7579350	7579485	TP53	TP53	GRCC-CHP2	exon	True
17	7579853	7579960	TP53	TP53	GRCC-CHP2	exon	True
3	10183765	10183854	VHL	VHL	GRCC-CHP2	exon	True
3	10188186	10188306	VHL	VHL	GRCC-CHP2	exon	True
3	10191418	10191527	VHL	VHL	GRCC-CHP2	exon	True
9	133738289	133738402	ABL1	ABL1	GRCC-CP1	exon	True
9	133747461	133747567	ABL1	ABL1	GRCC-CP1	exon	True
9	133748218	133748317	ABL1	ABL1	GRCC-CP1	exon	True
9	133748364	133748473	ABL1	ABL1	GRCC-CP1	exon	True
9	133750310	133750430	ABL1	ABL1	GRCC-CP1	exon	True
14	105246386	105246527	AKT1	AKT1	GRCC-CP1	exon	True
2	29432634	29432733	ALK	ALK	GRCC-CP1	exon	True
2	29443666	29443765	ALK	ALK	GRCC-CP1	exon	True
5	112173860	112173972	APC	APC	GRCC-CP1	exon	True
5	112174583	112174682	APC	APC	GRCC-CP1	exon	True
5	112175131	112175276	APC	APC	GRCC-CP1	exon	True
5	112175314	112175463	APC	APC	GRCC-CP1	exon	True
5	112175561	112175714	APC	APC	GRCC-CP1	exon	True
5	112175729	112175840	APC	APC	GRCC-CP1	exon	True
5	112175911	112176015	APC	APC	GRCC-CP1	exon	True
11	108117791	108117894	ATM	ATM	GRCC-CP1	exon	True
11	108119752	108119860	ATM	ATM	GRCC-CP1	exon	True
11	108123497	108123609	ATM	ATM	GRCC-CP1	exon	True
11	108137917	108138043	ATM	ATM	GRCC-CP1	exon	True
11	108155103	108155207	ATM	ATM	GRCC-CP1	exon	True
11	108170431	108170538	ATM	ATM	GRCC-CP1	exon	True
11	108172375	108172492	ATM	ATM	GRCC-CP1	exon	True
11	108173586	108173694	ATM	ATM	GRCC-CP1	exon	True
11	108180901	108181025	ATM	ATM	GRCC-CP1	exon	True
11	108200890	108200989	ATM	ATM	GRCC-CP1	exon	True
11	108204603	108204717	ATM	ATM	GRCC-CP1	exon	True
11	108205736	108205849	ATM	ATM	GRCC-CP1	exon	True
11	108206556	108206659	ATM	ATM	GRCC-CP1	exon	True
11	108218059	108218163	ATM	ATM	GRCC-CP1	exon	True
11	108225537	108225662	ATM	ATM	GRCC-CP1	exon	True
11	108236020	108236133	ATM	ATM	GRCC-CP1	exon	True
11	108236149	108236248	ATM	ATM	GRCC-CP1	exon	True
7	140453099	140453250	BRAF	BRAF	GRCC-CP1	exon	True
7	140481361	140481470	BRAF	BRAF	GRCC-CP1	exon	True
16	68835593	68835709	CDH1	CDH1	GRCC-CP1	exon	True
16	68846060	68846173	CDH1	CDH1	GRCC-CP1	exon	True
16	68847242	68847350	CDH1	CDH1	GRCC-CP1	exon	True
9	21971112	21971242	CDKN2A	CDKN2A	GRCC-CP1	exon	True
3	41266016	41266160	CTNNB1	CTNNB1	GRCC-CP1	exon	True
7	55211017	55211116	EGFR	EGFR	GRCC-CP1	exon	True
7	55221774	55221889	EGFR	EGFR	GRCC-CP1	exon	True
7	55232974	55233076	EGFR	EGFR	GRCC-CP1	exon	True
7	55241623	55241738	EGFR	EGFR	GRCC-CP1	exon	True
7	55242392	55242512	EGFR	EGFR	GRCC-CP1	exon	True
7	55248979	55249129	EGFR	EGFR	GRCC-CP1	exon	True
7	55259487	55259587	EGFR	EGFR	GRCC-CP1	exon	True
17	37880186	37880307	ERBB2	ERBB2	GRCC-CP1	exon	True
17	37880967	37881083	ERBB2	ERBB2	GRCC-CP1	exon	True
17	37881276	37881386	ERBB2	ERBB2	GRCC-CP1	exon	True
17	37881411	37881520	ERBB2	ERBB2	GRCC-CP1	exon	True
2	212288895	212289003	ERBB4	ERBB4	GRCC-CP1	exon	True
2	212530043	212530180	ERBB4	ERBB4	GRCC-CP1	exon	True
2	212576784	212576893	ERBB4	ERBB4	GRCC-CP1	exon	True
2	212578266	212578387	ERBB4	ERBB4	GRCC-CP1	exon	True
2	212587112	212587211	ERBB4	ERBB4	GRCC-CP1	exon	True
2	212589743	212589861	ERBB4	ERBB4	GRCC-CP1	exon	True
2	212652695	212652797	ERBB4	ERBB4	GRCC-CP1	exon	True
2	212812080	212812196	ERBB4	ERBB4	GRCC-CP1	exon	True
4	153245417	153245521	FBXW7	FBXW7	GRCC-CP1	exon	True
4	153247262	153247390	FBXW7	FBXW7	GRCC-CP1	exon	True
4	153249337	153249452	FBXW7	FBXW7	GRCC-CP1	exon	True
4	153250834	153250946	FBXW7	FBXW7	GRCC-CP1	exon	True
4	153258953	153259053	FBXW7	FBXW7	GRCC-CP1	exon	True
8	38282134	38282238	FGFR1	FGFR1	GRCC-CP1	exon	True
8	38285870	38285974	FGFR1	FGFR1	GRCC-CP1	exon	True
10	123257972	123258071	FGFR2	FGFR2	GRCC-CP1	exon	True
10	123274713	123274841	FGFR2	FGFR2	GRCC-CP1	exon	True
10	123279456	123279565	FGFR2	FGFR2	GRCC-CP1	exon	True
10	123279612	123279745	FGFR2	FGFR2	GRCC-CP1	exon	True
4	1803531	1803647	FGFR3	FGFR3	GRCC-CP1	exon	True
4	1806091	1806227	FGFR3	FGFR3	GRCC-CP1	exon	True
4	1807819	1807950	FGFR3	FGFR3	GRCC-CP1	exon	True
4	1808263	1808398	FGFR3	FGFR3	GRCC-CP1	exon	True
4	1808919	1809029	FGFR3	FGFR3	GRCC-CP1	exon	True
13	28592583	28592685	FLT3	FLT3	GRCC-CP1	exon	True
13	28602303	28602409	FLT3	FLT3	GRCC-CP1	exon	True
13	28608189	28608312	FLT3	FLT3	GRCC-CP1	exon	True
13	28608310	28608411	FLT3	FLT3	GRCC-CP1	exon	True
13	28610092	28610196	FLT3	FLT3	GRCC-CP1	exon	True
20	57484376	57484495	GNAS	GNAS	GRCC-CP1	exon	True
12	121431367	121431467	HNF1A	HNF1A	GRCC-CP1	exon	True
12	121431990	121432119	HNF1A	HNF1A	GRCC-CP1	exon	True
11	533798	533933	HRAS	HRAS	GRCC-CP1	exon	True
11	534233	534333	HRAS	HRAS	GRCC-CP1	exon	True
2	209113079	209113181	IDH1	IDH1	GRCC-CP1	exon	True
9	5073710	5073819	JAK2	JAK2	GRCC-CP1	exon	True
19	17945654	17945757	JAK3	JAK3	GRCC-CP1	exon	True
19	17947973	17948089	JAK3	JAK3	GRCC-CP1	exon	True
4	55946090	55946196	KDR	KDR	GRCC-CP1	exon	True
4	55946193	55946298	KDR	KDR	GRCC-CP1	exon	True
4	55953768	55953882	KDR	KDR	GRCC-CP1	exon	True
4	55955038	55955157	KDR	KDR	GRCC-CP1	exon	True
4	55960962	55961085	KDR	KDR	GRCC-CP1	exon	True
4	55962427	55962549	KDR	KDR	GRCC-CP1	exon	True
4	55972895	55973000	KDR	KDR	GRCC-CP1	exon	True
4	55979581	55979681	KDR	KDR	GRCC-CP1	exon	True
4	55980296	55980400	KDR	KDR	GRCC-CP1	exon	True
4	55561723	55561844	KIT	KIT	GRCC-CP1	exon	True
4	55592158	55592257	KIT	KIT	GRCC-CP1	exon	True
4	55593427	55593534	KIT	KIT	GRCC-CP1	exon	True
4	55593558	55593712	KIT	KIT	GRCC-CP1	exon	True
4	55594199	55594317	KIT	KIT	GRCC-CP1	exon	True
4	55595467	55595592	KIT	KIT	GRCC-CP1	exon	True
4	55597443	55597559	KIT	KIT	GRCC-CP1	exon	True
4	55599271	55599387	KIT	KIT	GRCC-CP1	exon	True
4	55602665	55602766	KIT	KIT	GRCC-CP1	exon	True
12	25378490	25378613	KRAS	KRAS	GRCC-CP1	exon	True
12	25380238	25380363	KRAS	KRAS	GRCC-CP1	exon	True
12	25398206	25398342	KRAS	KRAS	GRCC-CP1	exon	True
7	116339598	116339721	MET	MET	GRCC-CP1	exon	True
7	116340201	116340301	MET	MET	GRCC-CP1	exon	True
7	116411911	116412037	MET	MET	GRCC-CP1	exon	True
7	116417406	116417532	MET	MET	GRCC-CP1	exon	True
7	116423389	116423499	MET	MET	GRCC-CP1	exon	True
3	37067186	37067288	MLH1	MLH1	GRCC-CP1	exon	True
1	43814942	43815070	MPL	MPL	GRCC-CP1	exon	True
9	139397695	139397813	NOTCH1	NOTCH1	GRCC-CP1	exon	True
9	139399312	139399466	NOTCH1	NOTCH1	GRCC-CP1	exon	True
5	170837476	170837628	NPM1	NPM1	GRCC-CP1	exon	True
1	115256483	115256582	NRAS	NRAS	GRCC-CP1	exon	True
1	115258691	115258791	NRAS	NRAS	GRCC-CP1	exon	True
4	55140963	55141091	PDGFRA	PDGFRA	GRCC-CP1	exon	True
4	55144086	55144203	PDGFRA	PDGFRA	GRCC-CP1	exon	True
4	55144499	55144612	PDGFRA	PDGFRA	GRCC-CP1	exon	True
4	55152004	55152134	PDGFRA	PDGFRA	GRCC-CP1	exon	True
3	178916816	178916935	PIK3CA	PIK3CA	GRCC-CP1	exon	True
3	178921473	178921607	PIK3CA	PIK3CA	GRCC-CP1	exon	True
3	178927906	178928013	PIK3CA	PIK3CA	GRCC-CP1	exon	True
3	178936032	178936137	PIK3CA	PIK3CA	GRCC-CP1	exon	True
3	178938802	178938933	PIK3CA	PIK3CA	GRCC-CP1	exon	True
3	178951975	178952115	PIK3CA	PIK3CA	GRCC-CP1	exon	True
3	178952114	178952216	PIK3CA	PIK3CA	GRCC-CP1	exon	True
10	89624220	89624321	PTEN	PTEN	GRCC-CP1	exon	True
10	89685236	89685387	PTEN	PTEN	GRCC-CP1	exon	True
10	89711859	89711958	PTEN	PTEN	GRCC-CP1	exon	True
10	89717556	89717667	PTEN	PTEN	GRCC-CP1	exon	True
10	89717672	89717803	PTEN	PTEN	GRCC-CP1	exon	True
10	89720663	89720774	PTEN	PTEN	GRCC-CP1	exon	True
10	89720770	89720911	PTEN	PTEN	GRCC-CP1	exon	True
12	112888121	112888252	PTPN11	PTPN11	GRCC-CP1	exon	True
12	112926812	112926922	PTPN11	PTPN11	GRCC-CP1	exon	True
13	48919199	48919324	RB1	RB1	GRCC-CP1	exon	True
13	48923111	48923228	RB1	RB1	GRCC-CP1	exon	True
13	48942614	48942753	RB1	RB1	GRCC-CP1	exon	True
13	48955502	48955630	RB1	RB1	GRCC-CP1	exon	True
13	49027088	49027213	RB1	RB1	GRCC-CP1	exon	True
13	49033791	49033925	RB1	RB1	GRCC-CP1	exon	True
13	49037814	49037957	RB1	RB1	GRCC-CP1	exon	True
13	49039124	49039244	RB1	RB1	GRCC-CP1	exon	True
10	43609046	43609184	RET	RET	GRCC-CP1	exon	True
10	43609916	43610030	RET	RET	GRCC-CP1	exon	True
10	43613776	43613879	RET	RET	GRCC-CP1	exon	True
10	43615541	43615646	RET	RET	GRCC-CP1	exon	True
10	43617380	43617479	RET	RET	GRCC-CP1	exon	True
18	48575107	48575215	SMAD4	SMAD4	GRCC-CP1	exon	True
18	48581170	48581269	SMAD4	SMAD4	GRCC-CP1	exon	True
18	48584489	48584591	SMAD4	SMAD4	GRCC-CP1	exon	True
18	48586212	48586342	SMAD4	SMAD4	GRCC-CP1	exon	True
18	48591798	48591947	SMAD4	SMAD4	GRCC-CP1	exon	True
18	48593373	48593482	SMAD4	SMAD4	GRCC-CP1	exon	True
18	48603008	48603137	SMAD4	SMAD4	GRCC-CP1	exon	True
18	48604644	48604775	SMAD4	SMAD4	GRCC-CP1	exon	True
22	24133943	24134042	SMARCB1	SMARCB1	GRCC-CP1	exon	True
22	24143208	24143320	SMARCB1	SMARCB1	GRCC-CP1	exon	True
22	24145503	24145614	SMARCB1	SMARCB1	GRCC-CP1	exon	True
22	24176314	24176423	SMARCB1	SMARCB1	GRCC-CP1	exon	True
7	128845041	128845179	SMO	SMO	GRCC-CP1	exon	True
7	128845979	128846109	SMO	SMO	GRCC-CP1	exon	True
7	128846338	128846437	SMO	SMO	GRCC-CP1	exon	True
7	128850264	128850386	SMO	SMO	GRCC-CP1	exon	True
7	128851530	128851640	SMO	SMO	GRCC-CP1	exon	True
20	36031693	36031792	SRC	SRC	GRCC-CP1	exon	True
19	1206979	1207120	STK11	STK11	GRCC-CP1	exon	True
19	1220407	1220522	STK11	STK11	GRCC-CP1	exon	True
19	1221216	1221342	STK11	STK11	GRCC-CP1	exon	True
19	1223018	1223167	STK11	STK11	GRCC-CP1	exon	True
17	7573976	7574097	TP53	TP53	GRCC-CP1	exon	True
17	7577000	7577154	TP53	TP53	GRCC-CP1	exon	True
17	7577499	7577613	TP53	TP53	GRCC-CP1	exon	True
17	7578160	7578314	TP53	TP53	GRCC-CP1	exon	True
17	7578366	7578503	TP53	TP53	GRCC-CP1	exon	True
17	7578506	7578605	TP53	TP53	GRCC-CP1	exon	True
17	7579323	7579465	TP53	TP53	GRCC-CP1	exon	True
17	7579832	7579962	TP53	TP53	GRCC-CP1	exon	True
3	10183777	10183879	VHL	VHL	GRCC-CP1	exon	True
3	10188193	10188325	VHL	VHL	GRCC-CP1	exon	True
3	10191454	10191553	VHL	VHL	GRCC-CP1	exon	True
9	133738294	133738378	ABL1	ABL1	GRCC-MOSC3	exon	True
9	133747442	133747530	ABL1	ABL1	GRCC-MOSC3	exon	True
9	133748279	133748417	ABL1	ABL1	GRCC-MOSC3	exon	True
9	133750307	133750405	ABL1	ABL1	GRCC-MOSC3	exon	True
14	105241433	105241519	AKT1	AKT1	GRCC-MOSC3	exon	True
14	105246445	105246583	AKT1	AKT1	GRCC-MOSC3	exon	True
14	105246497	105246585	AKT1	AKT1	GRCC-MOSC3	exon	True
19	40762904	40763037	AKT2	AKT2	GRCC-MOSC3	exon	True
1	243858979	243859088	AKT3	AKT3	GRCC-MOSC3	exon	True
2	29430023	29430152	ALK	ALK	GRCC-MOSC3	exon	True
2	29432572	29432680	ALK	ALK	GRCC-MOSC3	exon	True
2	29432650	29432776	ALK	ALK	GRCC-MOSC3	exon	True
2	29436843	29436974	ALK	ALK	GRCC-MOSC3	exon	True
2	29443565	29443688	ALK	ALK	GRCC-MOSC3	exon	True
2	29443607	29443729	ALK	ALK	GRCC-MOSC3	exon	True
2	29443688	29443772	ALK	ALK	GRCC-MOSC3	exon	True
2	29445200	29445332	ALK	ALK	GRCC-MOSC3	exon	True
2	29445369	29445489	ALK	ALK	GRCC-MOSC3	exon	True
2	29446151	29446278	ALK	ALK	GRCC-MOSC3	exon	True
2	29446278	29446404	ALK	ALK	GRCC-MOSC3	exon	True
5	112173871	112173962	APC	APC	GRCC-MOSC3	exon	True
5	112174557	112174666	APC	APC	GRCC-MOSC3	exon	True
5	112175143	112175268	APC	APC	GRCC-MOSC3	exon	True
5	112175315	112175443	APC	APC	GRCC-MOSC3	exon	True
5	112175567	112175703	APC	APC	GRCC-MOSC3	exon	True
5	112175740	112175862	APC	APC	GRCC-MOSC3	exon	True
5	112175920	112176035	APC	APC	GRCC-MOSC3	exon	True
11	108117765	108117865	ATM	ATM	GRCC-MOSC3	exon	True
11	108119815	108119891	ATM	ATM	GRCC-MOSC3	exon	True
11	108123515	108123618	ATM	ATM	GRCC-MOSC3	exon	True
11	108137931	108138025	ATM	ATM	GRCC-MOSC3	exon	True
11	108155083	108155180	ATM	ATM	GRCC-MOSC3	exon	True
11	108170456	108170556	ATM	ATM	GRCC-MOSC3	exon	True
11	108172362	108172467	ATM	ATM	GRCC-MOSC3	exon	True
11	108173630	108173703	ATM	ATM	GRCC-MOSC3	exon	True
11	108180902	108180960	ATM	ATM	GRCC-MOSC3	exon	True
11	108200915	108200993	ATM	ATM	GRCC-MOSC3	exon	True
11	108204634	108204684	ATM	ATM	GRCC-MOSC3	exon	True
11	108205731	108205816	ATM	ATM	GRCC-MOSC3	exon	True
11	108206523	108206628	ATM	ATM	GRCC-MOSC3	exon	True
11	108218015	108218144	ATM	ATM	GRCC-MOSC3	exon	True
11	108225549	108225632	ATM	ATM	GRCC-MOSC3	exon	True
11	108236042	108236140	ATM	ATM	GRCC-MOSC3	exon	True
11	108236186	108236285	ATM	ATM	GRCC-MOSC3	exon	True
7	140453099	140453224	BRAF	BRAF	GRCC-MOSC3	exon	True
7	140453102	140453221	BRAF	BRAF	GRCC-MOSC3	exon	True
7	140481387	140481511	BRAF	BRAF	GRCC-MOSC3	exon	True
7	140481391	140481515	BRAF	BRAF	GRCC-MOSC3	exon	True
17	41197624	41197752	BRCA1	BRCA1	GRCC-MOSC3	exon	True
17	41197742	41197827	BRCA1	BRCA1	GRCC-MOSC3	exon	True
17	41199650	41199733	BRCA1	BRCA1	GRCC-MOSC3	exon	True
17	41201118	41201236	BRCA1	BRCA1	GRCC-MOSC3	exon	True
17	41203054	41203159	BRCA1	BRCA1	GRCC-MOSC3	exon	True
17	41209055	41209165	BRCA1	BRCA1	GRCC-MOSC3	exon	True
17	41215293	41215418	BRCA1	BRCA1	GRCC-MOSC3	exon	True
17	41215803	41215928	BRCA1	BRCA1	GRCC-MOSC3	exon	True
17	41215928	41216021	BRCA1	BRCA1	GRCC-MOSC3	exon	True
17	41219608	41219731	BRCA1	BRCA1	GRCC-MOSC3	exon	True
17	41222911	41222999	BRCA1	BRCA1	GRCC-MOSC3	exon	True
17	41222999	41223116	BRCA1	BRCA1	GRCC-MOSC3	exon	True
17	41223116	41223214	BRCA1	BRCA1	GRCC-MOSC3	exon	True
17	41223214	41223284	BRCA1	BRCA1	GRCC-MOSC3	exon	True
17	41226337	41226428	BRCA1	BRCA1	GRCC-MOSC3	exon	True
17	41226428	41226544	BRCA1	BRCA1	GRCC-MOSC3	exon	True
17	41228490	41228576	BRCA1	BRCA1	GRCC-MOSC3	exon	True
17	41228576	41228658	BRCA1	BRCA1	GRCC-MOSC3	exon	True
17	41234413	41234497	BRCA1	BRCA1	GRCC-MOSC3	exon	True
17	41234497	41234592	BRCA1	BRCA1	GRCC-MOSC3	exon	True
17	41242845	41242963	BRCA1	BRCA1	GRCC-MOSC3	exon	True
17	41242963	41243060	BRCA1	BRCA1	GRCC-MOSC3	exon	True
17	41243448	41243568	BRCA1	BRCA1	GRCC-MOSC3	exon	True
17	41243568	41243692	BRCA1	BRCA1	GRCC-MOSC3	exon	True
17	41243692	41243805	BRCA1	BRCA1	GRCC-MOSC3	exon	True
17	41243805	41243904	BRCA1	BRCA1	GRCC-MOSC3	exon	True
17	41243904	41244000	BRCA1	BRCA1	GRCC-MOSC3	exon	True
17	41243999	41244104	BRCA1	BRCA1	GRCC-MOSC3	exon	True
17	41244103	41244225	BRCA1	BRCA1	GRCC-MOSC3	exon	True
17	41244219	41244290	BRCA1	BRCA1	GRCC-MOSC3	exon	True
17	41244284	41244374	BRCA1	BRCA1	GRCC-MOSC3	exon	True
17	41244366	41244484	BRCA1	BRCA1	GRCC-MOSC3	exon	True
17	41244484	41244576	BRCA1	BRCA1	GRCC-MOSC3	exon	True
17	41244560	41244639	BRCA1	BRCA1	GRCC-MOSC3	exon	True
17	41244628	41244728	BRCA1	BRCA1	GRCC-MOSC3	exon	True
17	41244728	41244815	BRCA1	BRCA1	GRCC-MOSC3	exon	True
17	41244809	41244901	BRCA1	BRCA1	GRCC-MOSC3	exon	True
17	41244900	41245000	BRCA1	BRCA1	GRCC-MOSC3	exon	True
17	41245000	41245115	BRCA1	BRCA1	GRCC-MOSC3	exon	True
17	41245115	41245197	BRCA1	BRCA1	GRCC-MOSC3	exon	True
17	41245196	41245300	BRCA1	BRCA1	GRCC-MOSC3	exon	True
17	41245300	41245380	BRCA1	BRCA1	GRCC-MOSC3	exon	True
17	41245380	41245503	BRCA1	BRCA1	GRCC-MOSC3	exon	True
17	41245503	41245593	BRCA1	BRCA1	GRCC-MOSC3	exon	True
17	41245591	41245690	BRCA1	BRCA1	GRCC-MOSC3	exon	True
17	41245690	41245799	BRCA1	BRCA1	GRCC-MOSC3	exon	True
17	41245799	41245904	BRCA1	BRCA1	GRCC-MOSC3	exon	True
17	41245898	41245969	BRCA1	BRCA1	GRCC-MOSC3	exon	True
17	41245957	41246040	BRCA1	BRCA1	GRCC-MOSC3	exon	True
17	41246029	41246105	BRCA1	BRCA1	GRCC-MOSC3	exon	True
17	41246104	41246171	BRCA1	BRCA1	GRCC-MOSC3	exon	True
17	41246170	41246284	BRCA1	BRCA1	GRCC-MOSC3	exon	True
17	41246280	41246364	BRCA1	BRCA1	GRCC-MOSC3	exon	True
17	41246364	41246483	BRCA1	BRCA1	GRCC-MOSC3	exon	True
17	41246480	41246573	BRCA1	BRCA1	GRCC-MOSC3	exon	True
17	41246573	41246700	BRCA1	BRCA1	GRCC-MOSC3	exon	True
17	41246700	41246821	BRCA1	BRCA1	GRCC-MOSC3	exon	True
17	41246821	41246886	BRCA1	BRCA1	GRCC-MOSC3	exon	True
17	41247850	41247970	BRCA1	BRCA1	GRCC-MOSC3	exon	True
17	41251679	41251798	BRCA1	BRCA1	GRCC-MOSC3	exon	True
17	41251798	41251898	BRCA1	BRCA1	GRCC-MOSC3	exon	True
17	41256155	41256265	BRCA1	BRCA1	GRCC-MOSC3	exon	True
17	41256220	41256290	BRCA1	BRCA1	GRCC-MOSC3	exon	True
17	41256863	41256989	BRCA1	BRCA1	GRCC-MOSC3	exon	True
17	41258403	41258520	BRCA1	BRCA1	GRCC-MOSC3	exon	True
17	41258520	41258598	BRCA1	BRCA1	GRCC-MOSC3	exon	True
17	41267686	41267784	BRCA1	BRCA1	GRCC-MOSC3	exon	True
17	41267784	41267878	BRCA1	BRCA1	GRCC-MOSC3	exon	True
17	41275964	41276070	BRCA1	BRCA1	GRCC-MOSC3	exon	True
17	41276039	41276116	BRCA1	BRCA1	GRCC-MOSC3	exon	True
13	32890594	32890717	BRCA2	BRCA2	GRCC-MOSC3	exon	True
13	32893167	32893277	BRCA2	BRCA2	GRCC-MOSC3	exon	True
13	32893270	32893352	BRCA2	BRCA2	GRCC-MOSC3	exon	True
13	32893344	32893412	BRCA2	BRCA2	GRCC-MOSC3	exon	True
13	32899211	32899276	BRCA2	BRCA2	GRCC-MOSC3	exon	True
13	32899226	32899304	BRCA2	BRCA2	GRCC-MOSC3	exon	True
13	32900260	32900378	BRCA2	BRCA2	GRCC-MOSC3	exon	True
13	32900277	32900394	BRCA2	BRCA2	GRCC-MOSC3	exon	True
13	32900533	32900653	BRCA2	BRCA2	GRCC-MOSC3	exon	True
13	32900653	32900764	BRCA2	BRCA2	GRCC-MOSC3	exon	True
13	32903520	32903604	BRCA2	BRCA2	GRCC-MOSC3	exon	True
13	32903603	32903713	BRCA2	BRCA2	GRCC-MOSC3	exon	True
13	32905032	32905124	BRCA2	BRCA2	GRCC-MOSC3	exon	True
13	32905077	32905162	BRCA2	BRCA2	GRCC-MOSC3	exon	True
13	32906335	32906437	BRCA2	BRCA2	GRCC-MOSC3	exon	True
13	32906435	32906502	BRCA2	BRCA2	GRCC-MOSC3	exon	True
13	32906502	32906604	BRCA2	BRCA2	GRCC-MOSC3	exon	True
13	32906604	32906680	BRCA2	BRCA2	GRCC-MOSC3	exon	True
13	32906749	32906849	BRCA2	BRCA2	GRCC-MOSC3	exon	True
13	32906849	32906960	BRCA2	BRCA2	GRCC-MOSC3	exon	True
13	32906960	32907082	BRCA2	BRCA2	GRCC-MOSC3	exon	True
13	32907082	32907203	BRCA2	BRCA2	GRCC-MOSC3	exon	True
13	32907184	32907280	BRCA2	BRCA2	GRCC-MOSC3	exon	True
13	32907254	32907339	BRCA2	BRCA2	GRCC-MOSC3	exon	True
13	32907349	32907443	BRCA2	BRCA2	GRCC-MOSC3	exon	True
13	32907421	32907509	BRCA2	BRCA2	GRCC-MOSC3	exon	True
13	32907494	32907567	BRCA2	BRCA2	GRCC-MOSC3	exon	True
13	32910389	32910453	BRCA2	BRCA2	GRCC-MOSC3	exon	True
13	32910466	32910534	BRCA2	BRCA2	GRCC-MOSC3	exon	True
13	32910505	32910605	BRCA2	BRCA2	GRCC-MOSC3	exon	True
13	32910604	32910681	BRCA2	BRCA2	GRCC-MOSC3	exon	True
13	32910664	32910770	BRCA2	BRCA2	GRCC-MOSC3	exon	True
13	32910769	32910864	BRCA2	BRCA2	GRCC-MOSC3	exon	True
13	32910861	32910969	BRCA2	BRCA2	GRCC-MOSC3	exon	True
13	32910959	32911034	BRCA2	BRCA2	GRCC-MOSC3	exon	True
13	32911033	32911116	BRCA2	BRCA2	GRCC-MOSC3	exon	True
13	32911116	32911210	BRCA2	BRCA2	GRCC-MOSC3	exon	True
13	32911186	32911298	BRCA2	BRCA2	GRCC-MOSC3	exon	True
13	32911297	32911392	BRCA2	BRCA2	GRCC-MOSC3	exon	True
13	32911378	32911490	BRCA2	BRCA2	GRCC-MOSC3	exon	True
13	32911486	32911562	BRCA2	BRCA2	GRCC-MOSC3	exon	True
13	32911562	32911673	BRCA2	BRCA2	GRCC-MOSC3	exon	True
13	32911674	32911790	BRCA2	BRCA2	GRCC-MOSC3	exon	True
13	32911780	32911871	BRCA2	BRCA2	GRCC-MOSC3	exon	True
13	32911870	32911937	BRCA2	BRCA2	GRCC-MOSC3	exon	True
13	32911937	32912017	BRCA2	BRCA2	GRCC-MOSC3	exon	True
13	32912017	32912115	BRCA2	BRCA2	GRCC-MOSC3	exon	True
13	32912111	32912186	BRCA2	BRCA2	GRCC-MOSC3	exon	True
13	32912186	32912272	BRCA2	BRCA2	GRCC-MOSC3	exon	True
13	32912272	32912384	BRCA2	BRCA2	GRCC-MOSC3	exon	True
13	32912411	32912493	BRCA2	BRCA2	GRCC-MOSC3	exon	True
13	32912493	32912573	BRCA2	BRCA2	GRCC-MOSC3	exon	True
13	32912571	32912681	BRCA2	BRCA2	GRCC-MOSC3	exon	True
13	32912681	32912796	BRCA2	BRCA2	GRCC-MOSC3	exon	True
13	32912795	32912914	BRCA2	BRCA2	GRCC-MOSC3	exon	True
13	32912866	32912986	BRCA2	BRCA2	GRCC-MOSC3	exon	True
13	32912986	32913097	BRCA2	BRCA2	GRCC-MOSC3	exon	True
13	32913082	32913182	BRCA2	BRCA2	GRCC-MOSC3	exon	True
13	32913182	32913303	BRCA2	BRCA2	GRCC-MOSC3	exon	True
13	32913303	32913419	BRCA2	BRCA2	GRCC-MOSC3	exon	True
13	32913393	32913473	BRCA2	BRCA2	GRCC-MOSC3	exon	True
13	32913504	32913610	BRCA2	BRCA2	GRCC-MOSC3	exon	True
13	32913600	32913721	BRCA2	BRCA2	GRCC-MOSC3	exon	True
13	32913721	32913801	BRCA2	BRCA2	GRCC-MOSC3	exon	True
13	32913837	32913933	BRCA2	BRCA2	GRCC-MOSC3	exon	True
13	32913933	32914026	BRCA2	BRCA2	GRCC-MOSC3	exon	True
13	32914026	32914146	BRCA2	BRCA2	GRCC-MOSC3	exon	True
13	32914133	32914210	BRCA2	BRCA2	GRCC-MOSC3	exon	True
13	32914204	32914289	BRCA2	BRCA2	GRCC-MOSC3	exon	True
13	32914286	32914372	BRCA2	BRCA2	GRCC-MOSC3	exon	True
13	32914358	32914461	BRCA2	BRCA2	GRCC-MOSC3	exon	True
13	32914459	32914573	BRCA2	BRCA2	GRCC-MOSC3	exon	True
13	32914573	32914665	BRCA2	BRCA2	GRCC-MOSC3	exon	True
13	32914665	32914750	BRCA2	BRCA2	GRCC-MOSC3	exon	True
13	32914739	32914834	BRCA2	BRCA2	GRCC-MOSC3	exon	True
13	32914834	32914953	BRCA2	BRCA2	GRCC-MOSC3	exon	True
13	32914951	32915028	BRCA2	BRCA2	GRCC-MOSC3	exon	True
13	32915000	32915080	BRCA2	BRCA2	GRCC-MOSC3	exon	True
13	32915070	32915156	BRCA2	BRCA2	GRCC-MOSC3	exon	True
13	32915148	32915220	BRCA2	BRCA2	GRCC-MOSC3	exon	True
13	32915215	32915290	BRCA2	BRCA2	GRCC-MOSC3	exon	True
13	32915288	32915380	BRCA2	BRCA2	GRCC-MOSC3	exon	True
13	32920884	32921004	BRCA2	BRCA2	GRCC-MOSC3	exon	True
13	32921004	32921118	BRCA2	BRCA2	GRCC-MOSC3	exon	True
13	32928884	32929006	BRCA2	BRCA2	GRCC-MOSC3	exon	True
13	32929006	32929112	BRCA2	BRCA2	GRCC-MOSC3	exon	True
13	32929110	32929192	BRCA2	BRCA2	GRCC-MOSC3	exon	True
13	32929191	32929266	BRCA2	BRCA2	GRCC-MOSC3	exon	True
13	32929266	32929361	BRCA2	BRCA2	GRCC-MOSC3	exon	True
13	32929329	32929433	BRCA2	BRCA2	GRCC-MOSC3	exon	True
13	32930589	32930668	BRCA2	BRCA2	GRCC-MOSC3	exon	True
13	32930666	32930748	BRCA2	BRCA2	GRCC-MOSC3	exon	True
13	32931813	32931881	BRCA2	BRCA2	GRCC-MOSC3	exon	True
13	32931882	32931964	BRCA2	BRCA2	GRCC-MOSC3	exon	True
13	32931953	32932037	BRCA2	BRCA2	GRCC-MOSC3	exon	True
13	32932037	32932111	BRCA2	BRCA2	GRCC-MOSC3	exon	True
13	32936587	32936677	BRCA2	BRCA2	GRCC-MOSC3	exon	True
13	32936671	32936754	BRCA2	BRCA2	GRCC-MOSC3	exon	True
13	32936754	32936859	BRCA2	BRCA2	GRCC-MOSC3	exon	True
13	32937286	32937403	BRCA2	BRCA2	GRCC-MOSC3	exon	True
13	32937403	32937493	BRCA2	BRCA2	GRCC-MOSC3	exon	True
13	32937493	32937586	BRCA2	BRCA2	GRCC-MOSC3	exon	True
13	32937583	32937698	BRCA2	BRCA2	GRCC-MOSC3	exon	True
13	32944470	32944571	BRCA2	BRCA2	GRCC-MOSC3	exon	True
13	32944557	32944631	BRCA2	BRCA2	GRCC-MOSC3	exon	True
13	32944623	32944691	BRCA2	BRCA2	GRCC-MOSC3	exon	True
13	32945095	32945174	BRCA2	BRCA2	GRCC-MOSC3	exon	True
13	32945142	32945210	BRCA2	BRCA2	GRCC-MOSC3	exon	True
13	32950740	32950845	BRCA2	BRCA2	GRCC-MOSC3	exon	True
13	32950845	32950929	BRCA2	BRCA2	GRCC-MOSC3	exon	True
13	32953355	32953469	BRCA2	BRCA2	GRCC-MOSC3	exon	True
13	32953469	32953563	BRCA2	BRCA2	GRCC-MOSC3	exon	True
13	32953561	32953636	BRCA2	BRCA2	GRCC-MOSC3	exon	True
13	32953630	32953700	BRCA2	BRCA2	GRCC-MOSC3	exon	True
13	32953878	32953945	BRCA2	BRCA2	GRCC-MOSC3	exon	True
13	32953929	32954043	BRCA2	BRCA2	GRCC-MOSC3	exon	True
13	32954107	32954225	BRCA2	BRCA2	GRCC-MOSC3	exon	True
13	32954227	32954343	BRCA2	BRCA2	GRCC-MOSC3	exon	True
13	32968771	32968877	BRCA2	BRCA2	GRCC-MOSC3	exon	True
13	32968877	32968965	BRCA2	BRCA2	GRCC-MOSC3	exon	True
13	32968965	32969070	BRCA2	BRCA2	GRCC-MOSC3	exon	True
13	32971024	32971120	BRCA2	BRCA2	GRCC-MOSC3	exon	True
13	32971120	32971212	BRCA2	BRCA2	GRCC-MOSC3	exon	True
13	32972236	32972345	BRCA2	BRCA2	GRCC-MOSC3	exon	True
13	32972337	32972405	BRCA2	BRCA2	GRCC-MOSC3	exon	True
13	32972402	32972488	BRCA2	BRCA2	GRCC-MOSC3	exon	True
13	32972488	32972592	BRCA2	BRCA2	GRCC-MOSC3	exon	True
13	32972587	32972678	BRCA2	BRCA2	GRCC-MOSC3	exon	True
13	32972678	32972784	BRCA2	BRCA2	GRCC-MOSC3	exon	True
13	32972784	32972864	BRCA2	BRCA2	GRCC-MOSC3	exon	True
13	32972863	32972978	BRCA2	BRCA2	GRCC-MOSC3	exon	True
16	68835602	68835697	CDH1	CDH1	GRCC-MOSC3	exon	True
16	68846024	68846151	CDH1	CDH1	GRCC-MOSC3	exon	True
16	68847199	68847302	CDH1	CDH1	GRCC-MOSC3	exon	True
9	21970940	21971066	CDKN2A	CDKN2A	GRCC-MOSC3	exon	True
9	21971090	21971219	CDKN2A	CDKN2A	GRCC-MOSC3	exon	True
5	149433593	149433692	CSF1R	CSF1R	GRCC-MOSC3	exon	True
5	149452991	149453073	CSF1R	CSF1R	GRCC-MOSC3	exon	True
3	41265955	41266072	CTNNB1	CTNNB1	GRCC-MOSC3	exon	True
3	41266029	41266147	CTNNB1	CTNNB1	GRCC-MOSC3	exon	True
3	41266072	41266157	CTNNB1	CTNNB1	GRCC-MOSC3	exon	True
1	162688829	162688951	DDR2	DDR2	GRCC-MOSC3	exon	True
1	162722872	162722995	DDR2	DDR2	GRCC-MOSC3	exon	True
1	162724359	162724466	DDR2	DDR2	GRCC-MOSC3	exon	True
1	162724466	162724586	DDR2	DDR2	GRCC-MOSC3	exon	True
1	162724586	162724682	DDR2	DDR2	GRCC-MOSC3	exon	True
1	162724850	162724967	DDR2	DDR2	GRCC-MOSC3	exon	True
1	162724967	162725094	DDR2	DDR2	GRCC-MOSC3	exon	True
1	162725447	162725572	DDR2	DDR2	GRCC-MOSC3	exon	True
1	162729519	162729636	DDR2	DDR2	GRCC-MOSC3	exon	True
1	162729636	162729766	DDR2	DDR2	GRCC-MOSC3	exon	True
1	162730973	162731107	DDR2	DDR2	GRCC-MOSC3	exon	True
1	162731107	162731197	DDR2	DDR2	GRCC-MOSC3	exon	True
1	162731197	162731276	DDR2	DDR2	GRCC-MOSC3	exon	True
1	162735765	162735879	DDR2	DDR2	GRCC-MOSC3	exon	True
1	162736904	162737029	DDR2	DDR2	GRCC-MOSC3	exon	True
1	162737029	162737154	DDR2	DDR2	GRCC-MOSC3	exon	True
1	162740090	162740201	DDR2	DDR2	GRCC-MOSC3	exon	True
1	162740201	162740327	DDR2	DDR2	GRCC-MOSC3	exon	True
1	162741756	162741887	DDR2	DDR2	GRCC-MOSC3	exon	True
1	162741887	162742002	DDR2	DDR2	GRCC-MOSC3	exon	True
1	162742002	162742088	DDR2	DDR2	GRCC-MOSC3	exon	True
1	162743204	162743301	DDR2	DDR2	GRCC-MOSC3	exon	True
1	162743301	162743421	DDR2	DDR2	GRCC-MOSC3	exon	True
1	162745384	162745513	DDR2	DDR2	GRCC-MOSC3	exon	True
1	162745513	162745634	DDR2	DDR2	GRCC-MOSC3	exon	True
1	162745915	162746038	DDR2	DDR2	GRCC-MOSC3	exon	True
1	162746038	162746162	DDR2	DDR2	GRCC-MOSC3	exon	True
1	162748317	162748432	DDR2	DDR2	GRCC-MOSC3	exon	True
1	162748432	162748519	DDR2	DDR2	GRCC-MOSC3	exon	True
1	162749866	162749977	DDR2	DDR2	GRCC-MOSC3	exon	True
1	162749977	162750066	DDR2	DDR2	GRCC-MOSC3	exon	True
7	55211024	55211153	EGFR	EGFR	GRCC-MOSC3	exon	True
7	55211044	55211126	EGFR	EGFR	GRCC-MOSC3	exon	True
7	55221770	55221869	EGFR	EGFR	GRCC-MOSC3	exon	True
7	55221792	55221919	EGFR	EGFR	GRCC-MOSC3	exon	True
7	55227871	55227972	EGFR	EGFR	GRCC-MOSC3	exon	True
7	55227967	55228060	EGFR	EGFR	GRCC-MOSC3	exon	True
7	55232951	55233069	EGFR	EGFR	GRCC-MOSC3	exon	True
7	55232962	55233053	EGFR	EGFR	GRCC-MOSC3	exon	True
7	55241602	55241735	EGFR	EGFR	GRCC-MOSC3	exon	True
7	55241635	55241729	EGFR	EGFR	GRCC-MOSC3	exon	True
7	55242411	55242539	EGFR	EGFR	GRCC-MOSC3	exon	True
7	55242411	55242540	EGFR	EGFR	GRCC-MOSC3	exon	True
7	55248965	55249090	EGFR	EGFR	GRCC-MOSC3	exon	True
7	55248974	55249103	EGFR	EGFR	GRCC-MOSC3	exon	True
7	55249122	55249245	EGFR	EGFR	GRCC-MOSC3	exon	True
7	55259479	55259594	EGFR	EGFR	GRCC-MOSC3	exon	True
7	55259507	55259628	EGFR	EGFR	GRCC-MOSC3	exon	True
17	37868166	37868297	ERBB2	ERBB2	GRCC-MOSC3	exon	True
17	37880085	37880214	ERBB2	ERBB2	GRCC-MOSC3	exon	True
17	37880212	37880340	ERBB2	ERBB2	GRCC-MOSC3	exon	True
17	37880214	37880340	ERBB2	ERBB2	GRCC-MOSC3	exon	True
17	37880932	37881068	ERBB2	ERBB2	GRCC-MOSC3	exon	True
17	37880953	37881061	ERBB2	ERBB2	GRCC-MOSC3	exon	True
17	37881322	37881453	ERBB2	ERBB2	GRCC-MOSC3	exon	True
17	37881324	37881453	ERBB2	ERBB2	GRCC-MOSC3	exon	True
12	56474032	56474167	ERBB3	ERBB3	GRCC-MOSC3	exon	True
12	56477509	56477595	ERBB3	ERBB3	GRCC-MOSC3	exon	True
12	56477595	56477705	ERBB3	ERBB3	GRCC-MOSC3	exon	True
12	56478754	56478880	ERBB3	ERBB3	GRCC-MOSC3	exon	True
12	56478880	56478965	ERBB3	ERBB3	GRCC-MOSC3	exon	True
12	56480311	56480442	ERBB3	ERBB3	GRCC-MOSC3	exon	True
12	56481330	56481456	ERBB3	ERBB3	GRCC-MOSC3	exon	True
12	56481572	56481702	ERBB3	ERBB3	GRCC-MOSC3	exon	True
12	56481739	56481866	ERBB3	ERBB3	GRCC-MOSC3	exon	True
12	56481866	56481948	ERBB3	ERBB3	GRCC-MOSC3	exon	True
12	56482322	56482449	ERBB3	ERBB3	GRCC-MOSC3	exon	True
12	56482527	56482652	ERBB3	ERBB3	GRCC-MOSC3	exon	True
12	56486521	56486630	ERBB3	ERBB3	GRCC-MOSC3	exon	True
12	56486748	56486881	ERBB3	ERBB3	GRCC-MOSC3	exon	True
12	56487120	56487246	ERBB3	ERBB3	GRCC-MOSC3	exon	True
12	56487245	56487355	ERBB3	ERBB3	GRCC-MOSC3	exon	True
12	56487504	56487631	ERBB3	ERBB3	GRCC-MOSC3	exon	True
12	56487631	56487723	ERBB3	ERBB3	GRCC-MOSC3	exon	True
12	56487853	56487982	ERBB3	ERBB3	GRCC-MOSC3	exon	True
12	56488164	56488291	ERBB3	ERBB3	GRCC-MOSC3	exon	True
12	56488291	56488389	ERBB3	ERBB3	GRCC-MOSC3	exon	True
12	56488999	56489129	ERBB3	ERBB3	GRCC-MOSC3	exon	True
12	56489412	56489517	ERBB3	ERBB3	GRCC-MOSC3	exon	True
12	56489511	56489626	ERBB3	ERBB3	GRCC-MOSC3	exon	True
12	56490283	56490409	ERBB3	ERBB3	GRCC-MOSC3	exon	True
12	56490515	56490645	ERBB3	ERBB3	GRCC-MOSC3	exon	True
12	56490804	56490929	ERBB3	ERBB3	GRCC-MOSC3	exon	True
12	56490929	56491015	ERBB3	ERBB3	GRCC-MOSC3	exon	True
12	56491527	56491644	ERBB3	ERBB3	GRCC-MOSC3	exon	True
12	56491644	56491759	ERBB3	ERBB3	GRCC-MOSC3	exon	True
12	56492281	56492367	ERBB3	ERBB3	GRCC-MOSC3	exon	True
12	56492479	56492602	ERBB3	ERBB3	GRCC-MOSC3	exon	True
12	56492602	56492692	ERBB3	ERBB3	GRCC-MOSC3	exon	True
12	56493430	56493531	ERBB3	ERBB3	GRCC-MOSC3	exon	True
12	56493594	56493713	ERBB3	ERBB3	GRCC-MOSC3	exon	True
12	56493713	56493822	ERBB3	ERBB3	GRCC-MOSC3	exon	True
12	56493915	56494045	ERBB3	ERBB3	GRCC-MOSC3	exon	True
12	56494818	56494943	ERBB3	ERBB3	GRCC-MOSC3	exon	True
12	56494933	56495052	ERBB3	ERBB3	GRCC-MOSC3	exon	True
12	56495042	56495167	ERBB3	ERBB3	GRCC-MOSC3	exon	True
12	56495277	56495359	ERBB3	ERBB3	GRCC-MOSC3	exon	True
12	56495359	56495464	ERBB3	ERBB3	GRCC-MOSC3	exon	True
12	56495464	56495588	ERBB3	ERBB3	GRCC-MOSC3	exon	True
12	56495588	56495680	ERBB3	ERBB3	GRCC-MOSC3	exon	True
12	56495680	56495777	ERBB3	ERBB3	GRCC-MOSC3	exon	True
12	56495777	56495864	ERBB3	ERBB3	GRCC-MOSC3	exon	True
2	212288895	212288999	ERBB4	ERBB4	GRCC-MOSC3	exon	True
2	212288904	212288990	ERBB4	ERBB4	GRCC-MOSC3	exon	True
2	212530048	212530180	ERBB4	ERBB4	GRCC-MOSC3	exon	True
2	212530051	212530180	ERBB4	ERBB4	GRCC-MOSC3	exon	True
2	212576793	212576912	ERBB4	ERBB4	GRCC-MOSC3	exon	True
2	212576799	212576910	ERBB4	ERBB4	GRCC-MOSC3	exon	True
2	212578285	212578415	ERBB4	ERBB4	GRCC-MOSC3	exon	True
2	212578288	212578415	ERBB4	ERBB4	GRCC-MOSC3	exon	True
2	212587121	212587189	ERBB4	ERBB4	GRCC-MOSC3	exon	True
2	212587133	212587239	ERBB4	ERBB4	GRCC-MOSC3	exon	True
2	212587187	212587260	ERBB4	ERBB4	GRCC-MOSC3	exon	True
2	212589758	212589879	ERBB4	ERBB4	GRCC-MOSC3	exon	True
2	212589764	212589867	ERBB4	ERBB4	GRCC-MOSC3	exon	True
2	212652704	212652820	ERBB4	ERBB4	GRCC-MOSC3	exon	True
2	212652719	212652806	ERBB4	ERBB4	GRCC-MOSC3	exon	True
2	212812073	212812170	ERBB4	ERBB4	GRCC-MOSC3	exon	True
2	212812075	212812169	ERBB4	ERBB4	GRCC-MOSC3	exon	True
7	148508706	148508791	EZH2	EZH2	GRCC-MOSC3	exon	True
4	153243998	153244127	FBXW7	FBXW7	GRCC-MOSC3	exon	True
4	153244127	153244215	FBXW7	FBXW7	GRCC-MOSC3	exon	True
4	153244215	153244295	FBXW7	FBXW7	GRCC-MOSC3	exon	True
4	153244295	153244419	FBXW7	FBXW7	GRCC-MOSC3	exon	True
4	153245266	153245378	FBXW7	FBXW7	GRCC-MOSC3	exon	True
4	153245378	153245459	FBXW7	FBXW7	GRCC-MOSC3	exon	True
4	153245410	153245492	FBXW7	FBXW7	GRCC-MOSC3	exon	True
4	153245459	153245579	FBXW7	FBXW7	GRCC-MOSC3	exon	True
4	153247079	153247211	FBXW7	FBXW7	GRCC-MOSC3	exon	True
4	153247211	153247338	FBXW7	FBXW7	GRCC-MOSC3	exon	True
4	153247277	153247369	FBXW7	FBXW7	GRCC-MOSC3	exon	True
4	153247338	153247449	FBXW7	FBXW7	GRCC-MOSC3	exon	True
4	153249284	153249406	FBXW7	FBXW7	GRCC-MOSC3	exon	True
4	153249355	153249477	FBXW7	FBXW7	GRCC-MOSC3	exon	True
4	153249406	153249530	FBXW7	FBXW7	GRCC-MOSC3	exon	True
4	153249530	153249644	FBXW7	FBXW7	GRCC-MOSC3	exon	True
4	153250783	153250884	FBXW7	FBXW7	GRCC-MOSC3	exon	True
4	153250852	153250926	FBXW7	FBXW7	GRCC-MOSC3	exon	True
4	153250884	153250990	FBXW7	FBXW7	GRCC-MOSC3	exon	True
4	153251831	153251919	FBXW7	FBXW7	GRCC-MOSC3	exon	True
4	153251919	153252029	FBXW7	FBXW7	GRCC-MOSC3	exon	True
4	153253709	153253832	FBXW7	FBXW7	GRCC-MOSC3	exon	True
4	153253829	153253947	FBXW7	FBXW7	GRCC-MOSC3	exon	True
4	153258901	153259023	FBXW7	FBXW7	GRCC-MOSC3	exon	True
4	153259020	153259121	FBXW7	FBXW7	GRCC-MOSC3	exon	True
4	153268058	153268186	FBXW7	FBXW7	GRCC-MOSC3	exon	True
4	153268186	153268309	FBXW7	FBXW7	GRCC-MOSC3	exon	True
4	153271102	153271227	FBXW7	FBXW7	GRCC-MOSC3	exon	True
4	153271225	153271319	FBXW7	FBXW7	GRCC-MOSC3	exon	True
4	153332395	153332512	FBXW7	FBXW7	GRCC-MOSC3	exon	True
4	153332512	153332628	FBXW7	FBXW7	GRCC-MOSC3	exon	True
4	153332604	153332710	FBXW7	FBXW7	GRCC-MOSC3	exon	True
4	153332709	153332830	FBXW7	FBXW7	GRCC-MOSC3	exon	True
4	153332830	153332957	FBXW7	FBXW7	GRCC-MOSC3	exon	True
8	38272064	38272199	FGFR1	FGFR1	GRCC-MOSC3	exon	True
8	38272259	38272356	FGFR1	FGFR1	GRCC-MOSC3	exon	True
8	38274778	38274907	FGFR1	FGFR1	GRCC-MOSC3	exon	True
8	38282107	38282241	FGFR1	FGFR1	GRCC-MOSC3	exon	True
8	38282140	38282254	FGFR1	FGFR1	GRCC-MOSC3	exon	True
8	38285849	38285972	FGFR1	FGFR1	GRCC-MOSC3	exon	True
8	38285851	38285975	FGFR1	FGFR1	GRCC-MOSC3	exon	True
10	123247457	123247580	FGFR2	FGFR2	GRCC-MOSC3	exon	True
10	123247578	123247672	FGFR2	FGFR2	GRCC-MOSC3	exon	True
10	123257952	123258045	FGFR2	FGFR2	GRCC-MOSC3	exon	True
10	123257952	123258071	FGFR2	FGFR2	GRCC-MOSC3	exon	True
10	123274714	123274846	FGFR2	FGFR2	GRCC-MOSC3	exon	True
10	123274721	123274835	FGFR2	FGFR2	GRCC-MOSC3	exon	True
10	123279417	123279544	FGFR2	FGFR2	GRCC-MOSC3	exon	True
10	123279474	123279604	FGFR2	FGFR2	GRCC-MOSC3	exon	True
10	123279604	123279713	FGFR2	FGFR2	GRCC-MOSC3	exon	True
10	123279607	123279713	FGFR2	FGFR2	GRCC-MOSC3	exon	True
4	1803551	1803653	FGFR3	FGFR3	GRCC-MOSC3	exon	True
4	1803560	1803653	FGFR3	FGFR3	GRCC-MOSC3	exon	True
4	1806079	1806214	FGFR3	FGFR3	GRCC-MOSC3	exon	True
4	1806081	1806187	FGFR3	FGFR3	GRCC-MOSC3	exon	True
4	1807818	1807932	FGFR3	FGFR3	GRCC-MOSC3	exon	True
4	1807833	1807930	FGFR3	FGFR3	GRCC-MOSC3	exon	True
4	1808278	1808411	FGFR3	FGFR3	GRCC-MOSC3	exon	True
4	1808311	1808399	FGFR3	FGFR3	GRCC-MOSC3	exon	True
4	1808877	1809003	FGFR3	FGFR3	GRCC-MOSC3	exon	True
4	1808881	1809006	FGFR3	FGFR3	GRCC-MOSC3	exon	True
5	176516589	176516719	FGFR4	FGFR4	GRCC-MOSC3	exon	True
5	176517382	176517494	FGFR4	FGFR4	GRCC-MOSC3	exon	True
5	176517446	176517573	FGFR4	FGFR4	GRCC-MOSC3	exon	True
5	176517573	176517654	FGFR4	FGFR4	GRCC-MOSC3	exon	True
5	176517726	176517857	FGFR4	FGFR4	GRCC-MOSC3	exon	True
5	176517852	176517984	FGFR4	FGFR4	GRCC-MOSC3	exon	True
5	176517982	176518105	FGFR4	FGFR4	GRCC-MOSC3	exon	True
5	176518617	176518742	FGFR4	FGFR4	GRCC-MOSC3	exon	True
5	176518717	176518839	FGFR4	FGFR4	GRCC-MOSC3	exon	True
5	176519308	176519434	FGFR4	FGFR4	GRCC-MOSC3	exon	True
5	176519423	176519544	FGFR4	FGFR4	GRCC-MOSC3	exon	True
5	176519599	176519707	FGFR4	FGFR4	GRCC-MOSC3	exon	True
5	176519700	176519803	FGFR4	FGFR4	GRCC-MOSC3	exon	True
5	176520068	176520190	FGFR4	FGFR4	GRCC-MOSC3	exon	True
5	176520190	176520318	FGFR4	FGFR4	GRCC-MOSC3	exon	True
5	176520311	176520433	FGFR4	FGFR4	GRCC-MOSC3	exon	True
5	176520401	176520515	FGFR4	FGFR4	GRCC-MOSC3	exon	True
5	176520514	176520611	FGFR4	FGFR4	GRCC-MOSC3	exon	True
5	176520631	176520761	FGFR4	FGFR4	GRCC-MOSC3	exon	True
5	176522329	176522462	FGFR4	FGFR4	GRCC-MOSC3	exon	True
5	176522443	176522568	FGFR4	FGFR4	GRCC-MOSC3	exon	True
5	176522558	176522682	FGFR4	FGFR4	GRCC-MOSC3	exon	True
5	176522673	176522786	FGFR4	FGFR4	GRCC-MOSC3	exon	True
5	176523016	176523107	FGFR4	FGFR4	GRCC-MOSC3	exon	True
5	176523107	176523196	FGFR4	FGFR4	GRCC-MOSC3	exon	True
5	176523255	176523390	FGFR4	FGFR4	GRCC-MOSC3	exon	True
5	176523519	176523656	FGFR4	FGFR4	GRCC-MOSC3	exon	True
5	176523639	176523767	FGFR4	FGFR4	GRCC-MOSC3	exon	True
5	176524270	176524408	FGFR4	FGFR4	GRCC-MOSC3	exon	True
5	176524519	176524631	FGFR4	FGFR4	GRCC-MOSC3	exon	True
5	176524622	176524744	FGFR4	FGFR4	GRCC-MOSC3	exon	True
13	28877248	28877366	FLT1	FLT1	GRCC-MOSC3	exon	True
13	28877346	28877455	FLT1	FLT1	GRCC-MOSC3	exon	True
13	28877449	28877573	FLT1	FLT1	GRCC-MOSC3	exon	True
13	28880795	28880927	FLT1	FLT1	GRCC-MOSC3	exon	True
13	28882968	28883076	FLT1	FLT1	GRCC-MOSC3	exon	True
13	28885735	28885806	FLT1	FLT1	GRCC-MOSC3	exon	True
13	28885801	28885883	FLT1	FLT1	GRCC-MOSC3	exon	True
13	28886105	28886236	FLT1	FLT1	GRCC-MOSC3	exon	True
13	28891579	28891698	FLT1	FLT1	GRCC-MOSC3	exon	True
13	28891698	28891781	FLT1	FLT1	GRCC-MOSC3	exon	True
13	28893508	28893591	FLT1	FLT1	GRCC-MOSC3	exon	True
13	28893590	28893692	FLT1	FLT1	GRCC-MOSC3	exon	True
13	28895522	28895648	FLT1	FLT1	GRCC-MOSC3	exon	True
13	28895648	28895744	FLT1	FLT1	GRCC-MOSC3	exon	True
13	28896293	28896400	FLT1	FLT1	GRCC-MOSC3	exon	True
13	28896400	28896497	FLT1	FLT1	GRCC-MOSC3	exon	True
13	28896917	28897000	FLT1	FLT1	GRCC-MOSC3	exon	True
13	28897000	28897088	FLT1	FLT1	GRCC-MOSC3	exon	True
13	28901538	28901654	FLT1	FLT1	GRCC-MOSC3	exon	True
13	28901654	28901749	FLT1	FLT1	GRCC-MOSC3	exon	True
13	28903747	28903870	FLT1	FLT1	GRCC-MOSC3	exon	True
13	28908148	28908278	FLT1	FLT1	GRCC-MOSC3	exon	True
13	28913349	28913448	FLT1	FLT1	GRCC-MOSC3	exon	True
13	28919533	28919654	FLT1	FLT1	GRCC-MOSC3	exon	True
13	28919654	28919761	FLT1	FLT1	GRCC-MOSC3	exon	True
13	28931630	28931755	FLT1	FLT1	GRCC-MOSC3	exon	True
13	28931755	28931836	FLT1	FLT1	GRCC-MOSC3	exon	True
13	28958926	28959048	FLT1	FLT1	GRCC-MOSC3	exon	True
13	28959046	28959171	FLT1	FLT1	GRCC-MOSC3	exon	True
13	28963931	28964038	FLT1	FLT1	GRCC-MOSC3	exon	True
13	28964038	28964152	FLT1	FLT1	GRCC-MOSC3	exon	True
13	28964152	28964260	FLT1	FLT1	GRCC-MOSC3	exon	True
13	28971089	28971212	FLT1	FLT1	GRCC-MOSC3	exon	True
13	28979854	28979966	FLT1	FLT1	GRCC-MOSC3	exon	True
13	28979965	28980041	FLT1	FLT1	GRCC-MOSC3	exon	True
13	29001233	29001343	FLT1	FLT1	GRCC-MOSC3	exon	True
13	29001343	29001455	FLT1	FLT1	GRCC-MOSC3	exon	True
13	29001856	29001949	FLT1	FLT1	GRCC-MOSC3	exon	True
13	29001949	29002070	FLT1	FLT1	GRCC-MOSC3	exon	True
13	29004096	29004221	FLT1	FLT1	GRCC-MOSC3	exon	True
13	29004221	29004346	FLT1	FLT1	GRCC-MOSC3	exon	True
13	29005265	29005372	FLT1	FLT1	GRCC-MOSC3	exon	True
13	29005369	29005465	FLT1	FLT1	GRCC-MOSC3	exon	True
13	29007930	29008011	FLT1	FLT1	GRCC-MOSC3	exon	True
13	29008011	29008135	FLT1	FLT1	GRCC-MOSC3	exon	True
13	29008170	29008248	FLT1	FLT1	GRCC-MOSC3	exon	True
13	29008248	29008357	FLT1	FLT1	GRCC-MOSC3	exon	True
13	29012335	29012419	FLT1	FLT1	GRCC-MOSC3	exon	True
13	29012419	29012519	FLT1	FLT1	GRCC-MOSC3	exon	True
13	29040965	29041083	FLT1	FLT1	GRCC-MOSC3	exon	True
13	29041083	29041165	FLT1	FLT1	GRCC-MOSC3	exon	True
13	29041165	29041285	FLT1	FLT1	GRCC-MOSC3	exon	True
13	29041606	29041699	FLT1	FLT1	GRCC-MOSC3	exon	True
13	29041698	29041810	FLT1	FLT1	GRCC-MOSC3	exon	True
13	29068794	29068927	FLT1	FLT1	GRCC-MOSC3	exon	True
13	28592579	28592663	FLT3	FLT3	GRCC-MOSC3	exon	True
13	28602275	28602379	FLT3	FLT3	GRCC-MOSC3	exon	True
13	28608227	28608348	FLT3	FLT3	GRCC-MOSC3	exon	True
13	28610093	28610184	FLT3	FLT3	GRCC-MOSC3	exon	True
19	3118881	3118973	GNA11	GNA11	GRCC-MOSC3	exon	True
9	80409375	80409498	GNAQ	GNAQ	GRCC-MOSC3	exon	True
20	57484396	57484504	GNAS	GNAS	GRCC-MOSC3	exon	True
20	57484562	57484672	GNAS	GNAS	GRCC-MOSC3	exon	True
12	121431371	121431459	HNF1A	HNF1A	GRCC-MOSC3	exon	True
12	121432010	121432099	HNF1A	HNF1A	GRCC-MOSC3	exon	True
11	533381	533480	HRAS	HRAS	GRCC-MOSC3	exon	True
11	533479	533613	HRAS	HRAS	GRCC-MOSC3	exon	True
11	533801	533930	HRAS	HRAS	GRCC-MOSC3	exon	True
11	533812	533930	HRAS	HRAS	GRCC-MOSC3	exon	True
11	534216	534352	HRAS	HRAS	GRCC-MOSC3	exon	True
11	534220	534308	HRAS	HRAS	GRCC-MOSC3	exon	True
2	209113103	209113206	IDH1	IDH1	GRCC-MOSC3	exon	True
15	90631824	90631954	IDH2	IDH2	GRCC-MOSC3	exon	True
4	142949852	142949984	INPP4B	INPP4B	GRCC-MOSC3	exon	True
4	142949982	142950068	INPP4B	INPP4B	GRCC-MOSC3	exon	True
4	143003079	143003193	INPP4B	INPP4B	GRCC-MOSC3	exon	True
4	143003191	143003276	INPP4B	INPP4B	GRCC-MOSC3	exon	True
4	143003276	143003369	INPP4B	INPP4B	GRCC-MOSC3	exon	True
4	143007208	143007302	INPP4B	INPP4B	GRCC-MOSC3	exon	True
4	143007315	143007438	INPP4B	INPP4B	GRCC-MOSC3	exon	True
4	143029190	143029312	INPP4B	INPP4B	GRCC-MOSC3	exon	True
4	143029271	143029358	INPP4B	INPP4B	GRCC-MOSC3	exon	True
4	143033679	143033805	INPP4B	INPP4B	GRCC-MOSC3	exon	True
4	143033805	143033928	INPP4B	INPP4B	GRCC-MOSC3	exon	True
4	143043210	143043285	INPP4B	INPP4B	GRCC-MOSC3	exon	True
4	143043285	143043407	INPP4B	INPP4B	GRCC-MOSC3	exon	True
4	143044454	143044536	INPP4B	INPP4B	GRCC-MOSC3	exon	True
4	143044521	143044592	INPP4B	INPP4B	GRCC-MOSC3	exon	True
4	143045708	143045809	INPP4B	INPP4B	GRCC-MOSC3	exon	True
4	143045809	143045926	INPP4B	INPP4B	GRCC-MOSC3	exon	True
4	143067011	143067089	INPP4B	INPP4B	GRCC-MOSC3	exon	True
4	143067089	143067181	INPP4B	INPP4B	GRCC-MOSC3	exon	True
4	143081496	143081610	INPP4B	INPP4B	GRCC-MOSC3	exon	True
4	143081610	143081730	INPP4B	INPP4B	GRCC-MOSC3	exon	True
4	143094751	143094841	INPP4B	INPP4B	GRCC-MOSC3	exon	True
4	143094835	143094915	INPP4B	INPP4B	GRCC-MOSC3	exon	True
4	143094915	143094994	INPP4B	INPP4B	GRCC-MOSC3	exon	True
4	143114231	143114356	INPP4B	INPP4B	GRCC-MOSC3	exon	True
4	143129528	143129652	INPP4B	INPP4B	GRCC-MOSC3	exon	True
4	143129611	143129681	INPP4B	INPP4B	GRCC-MOSC3	exon	True
4	143130025	143130120	INPP4B	INPP4B	GRCC-MOSC3	exon	True
4	143130120	143130220	INPP4B	INPP4B	GRCC-MOSC3	exon	True
4	143159091	143159191	INPP4B	INPP4B	GRCC-MOSC3	exon	True
4	143181573	143181692	INPP4B	INPP4B	GRCC-MOSC3	exon	True
4	143181688	143181787	INPP4B	INPP4B	GRCC-MOSC3	exon	True
4	143191703	143191816	INPP4B	INPP4B	GRCC-MOSC3	exon	True
4	143191816	143191939	INPP4B	INPP4B	GRCC-MOSC3	exon	True
4	143226526	143226648	INPP4B	INPP4B	GRCC-MOSC3	exon	True
4	143226648	143226739	INPP4B	INPP4B	GRCC-MOSC3	exon	True
4	143235815	143235938	INPP4B	INPP4B	GRCC-MOSC3	exon	True
4	143324051	143324161	INPP4B	INPP4B	GRCC-MOSC3	exon	True
4	143324161	143324233	INPP4B	INPP4B	GRCC-MOSC3	exon	True
4	143326358	143326463	INPP4B	INPP4B	GRCC-MOSC3	exon	True
4	143326367	143326482	INPP4B	INPP4B	GRCC-MOSC3	exon	True
4	143350271	143350345	INPP4B	INPP4B	GRCC-MOSC3	exon	True
4	143350350	143350470	INPP4B	INPP4B	GRCC-MOSC3	exon	True
4	143352275	143352391	INPP4B	INPP4B	GRCC-MOSC3	exon	True
4	143352389	143352462	INPP4B	INPP4B	GRCC-MOSC3	exon	True
9	5073729	5073857	JAK2	JAK2	GRCC-MOSC3	exon	True
19	17945616	17945734	JAK3	JAK3	GRCC-MOSC3	exon	True
19	17947986	17948074	JAK3	JAK3	GRCC-MOSC3	exon	True
19	17954134	17954225	JAK3	JAK3	GRCC-MOSC3	exon	True
4	55946043	55946171	KDR	KDR	GRCC-MOSC3	exon	True
4	55946088	55946208	KDR	KDR	GRCC-MOSC3	exon	True
4	55946169	55946271	KDR	KDR	GRCC-MOSC3	exon	True
4	55946250	55946371	KDR	KDR	GRCC-MOSC3	exon	True
4	55946269	55946355	KDR	KDR	GRCC-MOSC3	exon	True
4	55948027	55948138	KDR	KDR	GRCC-MOSC3	exon	True
4	55948138	55948208	KDR	KDR	GRCC-MOSC3	exon	True
4	55948620	55948741	KDR	KDR	GRCC-MOSC3	exon	True
4	55948741	55948836	KDR	KDR	GRCC-MOSC3	exon	True
4	55953706	55953828	KDR	KDR	GRCC-MOSC3	exon	True
4	55953775	55953860	KDR	KDR	GRCC-MOSC3	exon	True
4	55953828	55953941	KDR	KDR	GRCC-MOSC3	exon	True
4	55954948	55955045	KDR	KDR	GRCC-MOSC3	exon	True
4	55955045	55955147	KDR	KDR	GRCC-MOSC3	exon	True
4	55955078	55955168	KDR	KDR	GRCC-MOSC3	exon	True
4	55955465	55955586	KDR	KDR	GRCC-MOSC3	exon	True
4	55955585	55955684	KDR	KDR	GRCC-MOSC3	exon	True
4	55955853	55955976	KDR	KDR	GRCC-MOSC3	exon	True
4	55956066	55956189	KDR	KDR	GRCC-MOSC3	exon	True
4	55956189	55956284	KDR	KDR	GRCC-MOSC3	exon	True
4	55958776	55958894	KDR	KDR	GRCC-MOSC3	exon	True
4	55960921	55961051	KDR	KDR	GRCC-MOSC3	exon	True
4	55960976	55961059	KDR	KDR	GRCC-MOSC3	exon	True
4	55961045	55961130	KDR	KDR	GRCC-MOSC3	exon	True
4	55961728	55961844	KDR	KDR	GRCC-MOSC3	exon	True
4	55962319	55962423	KDR	KDR	GRCC-MOSC3	exon	True
4	55962423	55962547	KDR	KDR	GRCC-MOSC3	exon	True
4	55962444	55962548	KDR	KDR	GRCC-MOSC3	exon	True
4	55963749	55963857	KDR	KDR	GRCC-MOSC3	exon	True
4	55963857	55963935	KDR	KDR	GRCC-MOSC3	exon	True
4	55964231	55964345	KDR	KDR	GRCC-MOSC3	exon	True
4	55964345	55964442	KDR	KDR	GRCC-MOSC3	exon	True
4	55964813	55964939	KDR	KDR	GRCC-MOSC3	exon	True
4	55964939	55965040	KDR	KDR	GRCC-MOSC3	exon	True
4	55968087	55968186	KDR	KDR	GRCC-MOSC3	exon	True
4	55968186	55968300	KDR	KDR	GRCC-MOSC3	exon	True
4	55968510	55968620	KDR	KDR	GRCC-MOSC3	exon	True
4	55968620	55968714	KDR	KDR	GRCC-MOSC3	exon	True
4	55970727	55970848	KDR	KDR	GRCC-MOSC3	exon	True
4	55970848	55970940	KDR	KDR	GRCC-MOSC3	exon	True
4	55970940	55971055	KDR	KDR	GRCC-MOSC3	exon	True
4	55971055	55971155	KDR	KDR	GRCC-MOSC3	exon	True
4	55971993	55972121	KDR	KDR	GRCC-MOSC3	exon	True
4	55972823	55972946	KDR	KDR	GRCC-MOSC3	exon	True
4	55972945	55973027	KDR	KDR	GRCC-MOSC3	exon	True
4	55972952	55973071	KDR	KDR	GRCC-MOSC3	exon	True
4	55973866	55973994	KDR	KDR	GRCC-MOSC3	exon	True
4	55973994	55974072	KDR	KDR	GRCC-MOSC3	exon	True
4	55976511	55976638	KDR	KDR	GRCC-MOSC3	exon	True
4	55976638	55976760	KDR	KDR	GRCC-MOSC3	exon	True
4	55976789	55976909	KDR	KDR	GRCC-MOSC3	exon	True
4	55976909	55977023	KDR	KDR	GRCC-MOSC3	exon	True
4	55979443	55979518	KDR	KDR	GRCC-MOSC3	exon	True
4	55979516	55979615	KDR	KDR	GRCC-MOSC3	exon	True
4	55979574	55979655	KDR	KDR	GRCC-MOSC3	exon	True
4	55979615	55979694	KDR	KDR	GRCC-MOSC3	exon	True
4	55980238	55980359	KDR	KDR	GRCC-MOSC3	exon	True
4	55980278	55980389	KDR	KDR	GRCC-MOSC3	exon	True
4	55980389	55980508	KDR	KDR	GRCC-MOSC3	exon	True
4	55980998	55981095	KDR	KDR	GRCC-MOSC3	exon	True
4	55981059	55981149	KDR	KDR	GRCC-MOSC3	exon	True
4	55981149	55981236	KDR	KDR	GRCC-MOSC3	exon	True
4	55981437	55981509	KDR	KDR	GRCC-MOSC3	exon	True
4	55981509	55981624	KDR	KDR	GRCC-MOSC3	exon	True
4	55984751	55984859	KDR	KDR	GRCC-MOSC3	exon	True
4	55984859	55984979	KDR	KDR	GRCC-MOSC3	exon	True
4	55987195	55987311	KDR	KDR	GRCC-MOSC3	exon	True
4	55987271	55987379	KDR	KDR	GRCC-MOSC3	exon	True
4	55991352	55991488	KDR	KDR	GRCC-MOSC3	exon	True
19	10597319	10597448	KEAP1	KEAP1	GRCC-MOSC3	exon	True
19	10597444	10597552	KEAP1	KEAP1	GRCC-MOSC3	exon	True
19	10599830	10599933	KEAP1	KEAP1	GRCC-MOSC3	exon	True
19	10599928	10600044	KEAP1	KEAP1	GRCC-MOSC3	exon	True
19	10600280	10600386	KEAP1	KEAP1	GRCC-MOSC3	exon	True
19	10600386	10600496	KEAP1	KEAP1	GRCC-MOSC3	exon	True
19	10600491	10600570	KEAP1	KEAP1	GRCC-MOSC3	exon	True
19	10602205	10602329	KEAP1	KEAP1	GRCC-MOSC3	exon	True
19	10602319	10602453	KEAP1	KEAP1	GRCC-MOSC3	exon	True
19	10602440	10602561	KEAP1	KEAP1	GRCC-MOSC3	exon	True
19	10602557	10602680	KEAP1	KEAP1	GRCC-MOSC3	exon	True
19	10602680	10602808	KEAP1	KEAP1	GRCC-MOSC3	exon	True
19	10602805	10602903	KEAP1	KEAP1	GRCC-MOSC3	exon	True
19	10602899	10602986	KEAP1	KEAP1	GRCC-MOSC3	exon	True
19	10610035	10610139	KEAP1	KEAP1	GRCC-MOSC3	exon	True
19	10610137	10610259	KEAP1	KEAP1	GRCC-MOSC3	exon	True
19	10610259	10610385	KEAP1	KEAP1	GRCC-MOSC3	exon	True
19	10610382	10610515	KEAP1	KEAP1	GRCC-MOSC3	exon	True
19	10610514	10610601	KEAP1	KEAP1	GRCC-MOSC3	exon	True
19	10610601	10610713	KEAP1	KEAP1	GRCC-MOSC3	exon	True
4	55561654	55561784	KIT	KIT	GRCC-MOSC3	exon	True
4	55592136	55592238	KIT	KIT	GRCC-MOSC3	exon	True
4	55592157	55592246	KIT	KIT	GRCC-MOSC3	exon	True
4	55593417	55593513	KIT	KIT	GRCC-MOSC3	exon	True
4	55593520	55593597	KIT	KIT	GRCC-MOSC3	exon	True
4	55593575	55593695	KIT	KIT	GRCC-MOSC3	exon	True
4	55593597	55593698	KIT	KIT	GRCC-MOSC3	exon	True
4	55594156	55594287	KIT	KIT	GRCC-MOSC3	exon	True
4	55594170	55594279	KIT	KIT	GRCC-MOSC3	exon	True
4	55595496	55595562	KIT	KIT	GRCC-MOSC3	exon	True
4	55597436	55597524	KIT	KIT	GRCC-MOSC3	exon	True
4	55599266	55599372	KIT	KIT	GRCC-MOSC3	exon	True
4	55599280	55599358	KIT	KIT	GRCC-MOSC3	exon	True
4	55602656	55602771	KIT	KIT	GRCC-MOSC3	exon	True
4	55602673	55602751	KIT	KIT	GRCC-MOSC3	exon	True
12	25378517	25378590	KRAS	KRAS	GRCC-MOSC3	exon	True
12	25378549	25378658	KRAS	KRAS	GRCC-MOSC3	exon	True
12	25378587	25378658	KRAS	KRAS	GRCC-MOSC3	exon	True
12	25380249	25380357	KRAS	KRAS	GRCC-MOSC3	exon	True
12	25380260	25380364	KRAS	KRAS	GRCC-MOSC3	exon	True
12	25398183	25398310	KRAS	KRAS	GRCC-MOSC3	exon	True
12	25398186	25398304	KRAS	KRAS	GRCC-MOSC3	exon	True
15	66727356	66727457	MAP2K1	MAP2K1	GRCC-MOSC3	exon	True
15	66727457	66727561	MAP2K1	MAP2K1	GRCC-MOSC3	exon	True
15	66729106	66729225	MAP2K1	MAP2K1	GRCC-MOSC3	exon	True
17	11958128	11958235	MAP2K4	MAP2K4	GRCC-MOSC3	exon	True
17	11958235	11958322	MAP2K4	MAP2K4	GRCC-MOSC3	exon	True
17	11984561	11984680	MAP2K4	MAP2K4	GRCC-MOSC3	exon	True
17	11984679	11984755	MAP2K4	MAP2K4	GRCC-MOSC3	exon	True
17	11984744	11984849	MAP2K4	MAP2K4	GRCC-MOSC3	exon	True
17	11998815	11998932	MAP2K4	MAP2K4	GRCC-MOSC3	exon	True
17	11998926	11999045	MAP2K4	MAP2K4	GRCC-MOSC3	exon	True
17	12011031	12011122	MAP2K4	MAP2K4	GRCC-MOSC3	exon	True
17	12011123	12011212	MAP2K4	MAP2K4	GRCC-MOSC3	exon	True
17	12011205	12011275	MAP2K4	MAP2K4	GRCC-MOSC3	exon	True
17	12013607	12013721	MAP2K4	MAP2K4	GRCC-MOSC3	exon	True
17	12013717	12013786	MAP2K4	MAP2K4	GRCC-MOSC3	exon	True
17	12016504	12016610	MAP2K4	MAP2K4	GRCC-MOSC3	exon	True
17	12016610	12016696	MAP2K4	MAP2K4	GRCC-MOSC3	exon	True
17	12028578	12028707	MAP2K4	MAP2K4	GRCC-MOSC3	exon	True
17	12032425	12032534	MAP2K4	MAP2K4	GRCC-MOSC3	exon	True
17	12032534	12032609	MAP2K4	MAP2K4	GRCC-MOSC3	exon	True
17	12043042	12043171	MAP2K4	MAP2K4	GRCC-MOSC3	exon	True
17	12043171	12043267	MAP2K4	MAP2K4	GRCC-MOSC3	exon	True
17	12044425	12044506	MAP2K4	MAP2K4	GRCC-MOSC3	exon	True
17	12044506	12044628	MAP2K4	MAP2K4	GRCC-MOSC3	exon	True
5	56152373	56152469	MAP3K1	MAP3K1	GRCC-MOSC3	exon	True
5	56152469	56152582	MAP3K1	MAP3K1	GRCC-MOSC3	exon	True
5	56155474	56155544	MAP3K1	MAP3K1	GRCC-MOSC3	exon	True
5	56155543	56155629	MAP3K1	MAP3K1	GRCC-MOSC3	exon	True
5	56155604	56155692	MAP3K1	MAP3K1	GRCC-MOSC3	exon	True
5	56155692	56155800	MAP3K1	MAP3K1	GRCC-MOSC3	exon	True
5	56160572	56160653	MAP3K1	MAP3K1	GRCC-MOSC3	exon	True
5	56160640	56160715	MAP3K1	MAP3K1	GRCC-MOSC3	exon	True
5	56160692	56160763	MAP3K1	MAP3K1	GRCC-MOSC3	exon	True
5	56161132	56161234	MAP3K1	MAP3K1	GRCC-MOSC3	exon	True
5	56161234	56161359	MAP3K1	MAP3K1	GRCC-MOSC3	exon	True
5	56161609	56161721	MAP3K1	MAP3K1	GRCC-MOSC3	exon	True
5	56161721	56161834	MAP3K1	MAP3K1	GRCC-MOSC3	exon	True
5	56167678	56167772	MAP3K1	MAP3K1	GRCC-MOSC3	exon	True
5	56167772	56167878	MAP3K1	MAP3K1	GRCC-MOSC3	exon	True
5	56168517	56168637	MAP3K1	MAP3K1	GRCC-MOSC3	exon	True
5	56168533	56168659	MAP3K1	MAP3K1	GRCC-MOSC3	exon	True
5	56168729	56168818	MAP3K1	MAP3K1	GRCC-MOSC3	exon	True
5	56168818	56168934	MAP3K1	MAP3K1	GRCC-MOSC3	exon	True
5	56170805	56170922	MAP3K1	MAP3K1	GRCC-MOSC3	exon	True
5	56170916	56171040	MAP3K1	MAP3K1	GRCC-MOSC3	exon	True
5	56171040	56171122	MAP3K1	MAP3K1	GRCC-MOSC3	exon	True
5	56171121	56171192	MAP3K1	MAP3K1	GRCC-MOSC3	exon	True
5	56174826	56174939	MAP3K1	MAP3K1	GRCC-MOSC3	exon	True
5	56176431	56176544	MAP3K1	MAP3K1	GRCC-MOSC3	exon	True
5	56176544	56176660	MAP3K1	MAP3K1	GRCC-MOSC3	exon	True
5	56176838	56176955	MAP3K1	MAP3K1	GRCC-MOSC3	exon	True
5	56176943	56177014	MAP3K1	MAP3K1	GRCC-MOSC3	exon	True
5	56177014	56177118	MAP3K1	MAP3K1	GRCC-MOSC3	exon	True
5	56177363	56177429	MAP3K1	MAP3K1	GRCC-MOSC3	exon	True
5	56177428	56177531	MAP3K1	MAP3K1	GRCC-MOSC3	exon	True
5	56177531	56177613	MAP3K1	MAP3K1	GRCC-MOSC3	exon	True
5	56177613	56177705	MAP3K1	MAP3K1	GRCC-MOSC3	exon	True
5	56177705	56177809	MAP3K1	MAP3K1	GRCC-MOSC3	exon	True
5	56177809	56177927	MAP3K1	MAP3K1	GRCC-MOSC3	exon	True
5	56177927	56178034	MAP3K1	MAP3K1	GRCC-MOSC3	exon	True
5	56178034	56178163	MAP3K1	MAP3K1	GRCC-MOSC3	exon	True
5	56178163	56178260	MAP3K1	MAP3K1	GRCC-MOSC3	exon	True
5	56178259	56178337	MAP3K1	MAP3K1	GRCC-MOSC3	exon	True
5	56178337	56178436	MAP3K1	MAP3K1	GRCC-MOSC3	exon	True
5	56178436	56178545	MAP3K1	MAP3K1	GRCC-MOSC3	exon	True
5	56178526	56178644	MAP3K1	MAP3K1	GRCC-MOSC3	exon	True
5	56179255	56179374	MAP3K1	MAP3K1	GRCC-MOSC3	exon	True
5	56179374	56179453	MAP3K1	MAP3K1	GRCC-MOSC3	exon	True
5	56179453	56179537	MAP3K1	MAP3K1	GRCC-MOSC3	exon	True
5	56180398	56180513	MAP3K1	MAP3K1	GRCC-MOSC3	exon	True
5	56180512	56180590	MAP3K1	MAP3K1	GRCC-MOSC3	exon	True
5	56180590	56180683	MAP3K1	MAP3K1	GRCC-MOSC3	exon	True
5	56181672	56181776	MAP3K1	MAP3K1	GRCC-MOSC3	exon	True
5	56181778	56181862	MAP3K1	MAP3K1	GRCC-MOSC3	exon	True
5	56183118	56183237	MAP3K1	MAP3K1	GRCC-MOSC3	exon	True
5	56183237	56183348	MAP3K1	MAP3K1	GRCC-MOSC3	exon	True
5	56183977	56184087	MAP3K1	MAP3K1	GRCC-MOSC3	exon	True
5	56184087	56184206	MAP3K1	MAP3K1	GRCC-MOSC3	exon	True
5	56189312	56189390	MAP3K1	MAP3K1	GRCC-MOSC3	exon	True
5	56189390	56189516	MAP3K1	MAP3K1	GRCC-MOSC3	exon	True
7	116339615	116339701	MET	MET	GRCC-MOSC3	exon	True
7	116340155	116340270	MET	MET	GRCC-MOSC3	exon	True
7	116403131	116403251	MET	MET	GRCC-MOSC3	exon	True
7	116411878	116411997	MET	MET	GRCC-MOSC3	exon	True
7	116411944	116412066	MET	MET	GRCC-MOSC3	exon	True
7	116417427	116417542	MET	MET	GRCC-MOSC3	exon	True
7	116418822	116418928	MET	MET	GRCC-MOSC3	exon	True
7	116418914	116419016	MET	MET	GRCC-MOSC3	exon	True
7	116422009	116422076	MET	MET	GRCC-MOSC3	exon	True
7	116422063	116422162	MET	MET	GRCC-MOSC3	exon	True
7	116423349	116423469	MET	MET	GRCC-MOSC3	exon	True
7	116423404	116423532	MET	MET	GRCC-MOSC3	exon	True
7	116423407	116423492	MET	MET	GRCC-MOSC3	exon	True
3	37067207	37067333	MLH1	MLH1	GRCC-MOSC3	exon	True
1	43814968	43815086	MPL	MPL	GRCC-MOSC3	exon	True
1	11167474	11167554	MTOR	MTOR	GRCC-MOSC3	exon	True
1	11167554	11167683	MTOR	MTOR	GRCC-MOSC3	exon	True
1	11168234	11168355	MTOR	MTOR	GRCC-MOSC3	exon	True
1	11169341	11169455	MTOR	MTOR	GRCC-MOSC3	exon	True
1	11169693	11169807	MTOR	MTOR	GRCC-MOSC3	exon	True
1	11172870	11172960	MTOR	MTOR	GRCC-MOSC3	exon	True
1	11172963	11173091	MTOR	MTOR	GRCC-MOSC3	exon	True
1	11174373	11174495	MTOR	MTOR	GRCC-MOSC3	exon	True
1	11174493	11174581	MTOR	MTOR	GRCC-MOSC3	exon	True
1	11174796	11174903	MTOR	MTOR	GRCC-MOSC3	exon	True
1	11174902	11174976	MTOR	MTOR	GRCC-MOSC3	exon	True
1	11175422	11175548	MTOR	MTOR	GRCC-MOSC3	exon	True
1	11177000	11177079	MTOR	MTOR	GRCC-MOSC3	exon	True
1	11177079	11177160	MTOR	MTOR	GRCC-MOSC3	exon	True
1	11181256	11181386	MTOR	MTOR	GRCC-MOSC3	exon	True
1	11181386	11181468	MTOR	MTOR	GRCC-MOSC3	exon	True
1	11181982	11182108	MTOR	MTOR	GRCC-MOSC3	exon	True
1	11182101	11182192	MTOR	MTOR	GRCC-MOSC3	exon	True
1	11184540	11184659	MTOR	MTOR	GRCC-MOSC3	exon	True
1	11184659	11184751	MTOR	MTOR	GRCC-MOSC3	exon	True
1	11186609	11186737	MTOR	MTOR	GRCC-MOSC3	exon	True
1	11186737	11186861	MTOR	MTOR	GRCC-MOSC3	exon	True
1	11186973	11187099	MTOR	MTOR	GRCC-MOSC3	exon	True
1	11187099	11187210	MTOR	MTOR	GRCC-MOSC3	exon	True
1	11187656	11187776	MTOR	MTOR	GRCC-MOSC3	exon	True
1	11187776	11187864	MTOR	MTOR	GRCC-MOSC3	exon	True
1	11188005	11188105	MTOR	MTOR	GRCC-MOSC3	exon	True
1	11188105	11188228	MTOR	MTOR	GRCC-MOSC3	exon	True
1	11188491	11188568	MTOR	MTOR	GRCC-MOSC3	exon	True
1	11188568	11188686	MTOR	MTOR	GRCC-MOSC3	exon	True
1	11188801	11188912	MTOR	MTOR	GRCC-MOSC3	exon	True
1	11188912	11189039	MTOR	MTOR	GRCC-MOSC3	exon	True
1	11189776	11189901	MTOR	MTOR	GRCC-MOSC3	exon	True
1	11190468	11190598	MTOR	MTOR	GRCC-MOSC3	exon	True
1	11190613	11190747	MTOR	MTOR	GRCC-MOSC3	exon	True
1	11190661	11190792	MTOR	MTOR	GRCC-MOSC3	exon	True
1	11190789	11190903	MTOR	MTOR	GRCC-MOSC3	exon	True
1	11193068	11193191	MTOR	MTOR	GRCC-MOSC3	exon	True
1	11193191	11193275	MTOR	MTOR	GRCC-MOSC3	exon	True
1	11194309	11194433	MTOR	MTOR	GRCC-MOSC3	exon	True
1	11194432	11194524	MTOR	MTOR	GRCC-MOSC3	exon	True
1	11199297	11199384	MTOR	MTOR	GRCC-MOSC3	exon	True
1	11199384	11199519	MTOR	MTOR	GRCC-MOSC3	exon	True
1	11199569	11199659	MTOR	MTOR	GRCC-MOSC3	exon	True
1	11199648	11199717	MTOR	MTOR	GRCC-MOSC3	exon	True
1	11204704	11204823	MTOR	MTOR	GRCC-MOSC3	exon	True
1	11205008	11205125	MTOR	MTOR	GRCC-MOSC3	exon	True
1	11206726	11206854	MTOR	MTOR	GRCC-MOSC3	exon	True
1	11210127	11210238	MTOR	MTOR	GRCC-MOSC3	exon	True
1	11210238	11210314	MTOR	MTOR	GRCC-MOSC3	exon	True
1	11217149	11217271	MTOR	MTOR	GRCC-MOSC3	exon	True
1	11217271	11217351	MTOR	MTOR	GRCC-MOSC3	exon	True
1	11227470	11227598	MTOR	MTOR	GRCC-MOSC3	exon	True
1	11259283	11259368	MTOR	MTOR	GRCC-MOSC3	exon	True
1	11259368	11259463	MTOR	MTOR	GRCC-MOSC3	exon	True
1	11259532	11259637	MTOR	MTOR	GRCC-MOSC3	exon	True
1	11259637	11259761	MTOR	MTOR	GRCC-MOSC3	exon	True
1	11264616	11264712	MTOR	MTOR	GRCC-MOSC3	exon	True
1	11264694	11264782	MTOR	MTOR	GRCC-MOSC3	exon	True
1	11269355	11269466	MTOR	MTOR	GRCC-MOSC3	exon	True
1	11269466	11269575	MTOR	MTOR	GRCC-MOSC3	exon	True
1	11270851	11270970	MTOR	MTOR	GRCC-MOSC3	exon	True
1	11272366	11272480	MTOR	MTOR	GRCC-MOSC3	exon	True
1	11272480	11272554	MTOR	MTOR	GRCC-MOSC3	exon	True
1	11272846	11272970	MTOR	MTOR	GRCC-MOSC3	exon	True
1	11273445	11273553	MTOR	MTOR	GRCC-MOSC3	exon	True
1	11273553	11273673	MTOR	MTOR	GRCC-MOSC3	exon	True
1	11276170	11276299	MTOR	MTOR	GRCC-MOSC3	exon	True
1	11288677	11288758	MTOR	MTOR	GRCC-MOSC3	exon	True
1	11288757	11288859	MTOR	MTOR	GRCC-MOSC3	exon	True
1	11288859	11288976	MTOR	MTOR	GRCC-MOSC3	exon	True
1	11290919	11291046	MTOR	MTOR	GRCC-MOSC3	exon	True
1	11291046	11291173	MTOR	MTOR	GRCC-MOSC3	exon	True
1	11291266	11291386	MTOR	MTOR	GRCC-MOSC3	exon	True
1	11291386	11291512	MTOR	MTOR	GRCC-MOSC3	exon	True
1	11292484	11292593	MTOR	MTOR	GRCC-MOSC3	exon	True
1	11293420	11293505	MTOR	MTOR	GRCC-MOSC3	exon	True
1	11293505	11293609	MTOR	MTOR	GRCC-MOSC3	exon	True
1	11294198	11294323	MTOR	MTOR	GRCC-MOSC3	exon	True
1	11297898	11297999	MTOR	MTOR	GRCC-MOSC3	exon	True
1	11297999	11298109	MTOR	MTOR	GRCC-MOSC3	exon	True
1	11298414	11298545	MTOR	MTOR	GRCC-MOSC3	exon	True
1	11298542	11298626	MTOR	MTOR	GRCC-MOSC3	exon	True
1	11298626	11298713	MTOR	MTOR	GRCC-MOSC3	exon	True
1	11300310	11300392	MTOR	MTOR	GRCC-MOSC3	exon	True
1	11300389	11300517	MTOR	MTOR	GRCC-MOSC3	exon	True
1	11300516	11300616	MTOR	MTOR	GRCC-MOSC3	exon	True
1	11301597	11301690	MTOR	MTOR	GRCC-MOSC3	exon	True
1	11301689	11301779	MTOR	MTOR	GRCC-MOSC3	exon	True
1	11303136	11303244	MTOR	MTOR	GRCC-MOSC3	exon	True
1	11303244	11303358	MTOR	MTOR	GRCC-MOSC3	exon	True
1	11307674	11307797	MTOR	MTOR	GRCC-MOSC3	exon	True
1	11307842	11307969	MTOR	MTOR	GRCC-MOSC3	exon	True
1	11307968	11308096	MTOR	MTOR	GRCC-MOSC3	exon	True
1	11308096	11308179	MTOR	MTOR	GRCC-MOSC3	exon	True
1	11313895	11313980	MTOR	MTOR	GRCC-MOSC3	exon	True
1	11313980	11314060	MTOR	MTOR	GRCC-MOSC3	exon	True
1	11316047	11316178	MTOR	MTOR	GRCC-MOSC3	exon	True
1	11316178	11316257	MTOR	MTOR	GRCC-MOSC3	exon	True
1	11316988	11317110	MTOR	MTOR	GRCC-MOSC3	exon	True
1	11317107	11317222	MTOR	MTOR	GRCC-MOSC3	exon	True
1	11318442	11318557	MTOR	MTOR	GRCC-MOSC3	exon	True
1	11318557	11318681	MTOR	MTOR	GRCC-MOSC3	exon	True
1	11319283	11319400	MTOR	MTOR	GRCC-MOSC3	exon	True
1	11319397	11319478	MTOR	MTOR	GRCC-MOSC3	exon	True
17	29422220	29422354	NF1	NF1	GRCC-MOSC3	exon	True
17	29422353	29422441	NF1	NF1	GRCC-MOSC3	exon	True
17	29482933	29483045	NF1	NF1	GRCC-MOSC3	exon	True
17	29483045	29483152	NF1	NF1	GRCC-MOSC3	exon	True
17	29485995	29486114	NF1	NF1	GRCC-MOSC3	exon	True
17	29490213	29490289	NF1	NF1	GRCC-MOSC3	exon	True
17	29490288	29490394	NF1	NF1	GRCC-MOSC3	exon	True
17	29496918	29496984	NF1	NF1	GRCC-MOSC3	exon	True
17	29496924	29497000	NF1	NF1	GRCC-MOSC3	exon	True
17	29508384	29508492	NF1	NF1	GRCC-MOSC3	exon	True
17	29508492	29508566	NF1	NF1	GRCC-MOSC3	exon	True
17	29508670	29508779	NF1	NF1	GRCC-MOSC3	exon	True
17	29508750	29508845	NF1	NF1	GRCC-MOSC3	exon	True
17	29509482	29509602	NF1	NF1	GRCC-MOSC3	exon	True
17	29509596	29509720	NF1	NF1	GRCC-MOSC3	exon	True
17	29527398	29527486	NF1	NF1	GRCC-MOSC3	exon	True
17	29527481	29527568	NF1	NF1	GRCC-MOSC3	exon	True
17	29527544	29527615	NF1	NF1	GRCC-MOSC3	exon	True
17	29527962	29528084	NF1	NF1	GRCC-MOSC3	exon	True
17	29528083	29528160	NF1	NF1	GRCC-MOSC3	exon	True
17	29528160	29528287	NF1	NF1	GRCC-MOSC3	exon	True
17	29528370	29528489	NF1	NF1	GRCC-MOSC3	exon	True
17	29528488	29528574	NF1	NF1	GRCC-MOSC3	exon	True
17	29533156	29533280	NF1	NF1	GRCC-MOSC3	exon	True
17	29533280	29533398	NF1	NF1	GRCC-MOSC3	exon	True
17	29541431	29541512	NF1	NF1	GRCC-MOSC3	exon	True
17	29541533	29541655	NF1	NF1	GRCC-MOSC3	exon	True
17	29546037	29546125	NF1	NF1	GRCC-MOSC3	exon	True
17	29546124	29546207	NF1	NF1	GRCC-MOSC3	exon	True
17	29548852	29548922	NF1	NF1	GRCC-MOSC3	exon	True
17	29548922	29549041	NF1	NF1	GRCC-MOSC3	exon	True
17	29550406	29550528	NF1	NF1	GRCC-MOSC3	exon	True
17	29550526	29550610	NF1	NF1	GRCC-MOSC3	exon	True
17	29552094	29552207	NF1	NF1	GRCC-MOSC3	exon	True
17	29552207	29552284	NF1	NF1	GRCC-MOSC3	exon	True
17	29553443	29553536	NF1	NF1	GRCC-MOSC3	exon	True
17	29553536	29553654	NF1	NF1	GRCC-MOSC3	exon	True
17	29553647	29553725	NF1	NF1	GRCC-MOSC3	exon	True
17	29554223	29554348	NF1	NF1	GRCC-MOSC3	exon	True
17	29554522	29554638	NF1	NF1	GRCC-MOSC3	exon	True
17	29555978	29556068	NF1	NF1	GRCC-MOSC3	exon	True
17	29556068	29556200	NF1	NF1	GRCC-MOSC3	exon	True
17	29556200	29556313	NF1	NF1	GRCC-MOSC3	exon	True
17	29556313	29556405	NF1	NF1	GRCC-MOSC3	exon	True
17	29556405	29556521	NF1	NF1	GRCC-MOSC3	exon	True
17	29556835	29556912	NF1	NF1	GRCC-MOSC3	exon	True
17	29556911	29556979	NF1	NF1	GRCC-MOSC3	exon	True
17	29556976	29557079	NF1	NF1	GRCC-MOSC3	exon	True
17	29557241	29557338	NF1	NF1	GRCC-MOSC3	exon	True
17	29557328	29557443	NF1	NF1	GRCC-MOSC3	exon	True
17	29557814	29557897	NF1	NF1	GRCC-MOSC3	exon	True
17	29557888	29557957	NF1	NF1	GRCC-MOSC3	exon	True
17	29559050	29559171	NF1	NF1	GRCC-MOSC3	exon	True
17	29559170	29559270	NF1	NF1	GRCC-MOSC3	exon	True
17	29559643	29559763	NF1	NF1	GRCC-MOSC3	exon	True
17	29559763	29559862	NF1	NF1	GRCC-MOSC3	exon	True
17	29559857	29559933	NF1	NF1	GRCC-MOSC3	exon	True
17	29560005	29560119	NF1	NF1	GRCC-MOSC3	exon	True
17	29560119	29560222	NF1	NF1	GRCC-MOSC3	exon	True
17	29560222	29560330	NF1	NF1	GRCC-MOSC3	exon	True
17	29562593	29562680	NF1	NF1	GRCC-MOSC3	exon	True
17	29562680	29562801	NF1	NF1	GRCC-MOSC3	exon	True
17	29562825	29562947	NF1	NF1	GRCC-MOSC3	exon	True
17	29562947	29563039	NF1	NF1	GRCC-MOSC3	exon	True
17	29575905	29576028	NF1	NF1	GRCC-MOSC3	exon	True
17	29576028	29576112	NF1	NF1	GRCC-MOSC3	exon	True
17	29576100	29576194	NF1	NF1	GRCC-MOSC3	exon	True
17	29579942	29580015	NF1	NF1	GRCC-MOSC3	exon	True
17	29579990	29580090	NF1	NF1	GRCC-MOSC3	exon	True
17	29585272	29585366	NF1	NF1	GRCC-MOSC3	exon	True
17	29585366	29585473	NF1	NF1	GRCC-MOSC3	exon	True
17	29585450	29585571	NF1	NF1	GRCC-MOSC3	exon	True
17	29585974	29586080	NF1	NF1	GRCC-MOSC3	exon	True
17	29586079	29586152	NF1	NF1	GRCC-MOSC3	exon	True
17	29587367	29587488	NF1	NF1	GRCC-MOSC3	exon	True
17	29587488	29587607	NF1	NF1	GRCC-MOSC3	exon	True
17	29588654	29588774	NF1	NF1	GRCC-MOSC3	exon	True
17	29588774	29588895	NF1	NF1	GRCC-MOSC3	exon	True
17	29592221	29592292	NF1	NF1	GRCC-MOSC3	exon	True
17	29592272	29592345	NF1	NF1	GRCC-MOSC3	exon	True
17	29592334	29592409	NF1	NF1	GRCC-MOSC3	exon	True
17	29652804	29652905	NF1	NF1	GRCC-MOSC3	exon	True
17	29652862	29652966	NF1	NF1	GRCC-MOSC3	exon	True
17	29652966	29653074	NF1	NF1	GRCC-MOSC3	exon	True
17	29653074	29653188	NF1	NF1	GRCC-MOSC3	exon	True
17	29653187	29653299	NF1	NF1	GRCC-MOSC3	exon	True
17	29654500	29654629	NF1	NF1	GRCC-MOSC3	exon	True
17	29654629	29654703	NF1	NF1	GRCC-MOSC3	exon	True
17	29654703	29654825	NF1	NF1	GRCC-MOSC3	exon	True
17	29654825	29654896	NF1	NF1	GRCC-MOSC3	exon	True
17	29657234	29657325	NF1	NF1	GRCC-MOSC3	exon	True
17	29657317	29657391	NF1	NF1	GRCC-MOSC3	exon	True
17	29657391	29657482	NF1	NF1	GRCC-MOSC3	exon	True
17	29657482	29657593	NF1	NF1	GRCC-MOSC3	exon	True
17	29661843	29661913	NF1	NF1	GRCC-MOSC3	exon	True
17	29661913	29662001	NF1	NF1	GRCC-MOSC3	exon	True
17	29661991	29662058	NF1	NF1	GRCC-MOSC3	exon	True
17	29663238	29663353	NF1	NF1	GRCC-MOSC3	exon	True
17	29663353	29663419	NF1	NF1	GRCC-MOSC3	exon	True
17	29663419	29663521	NF1	NF1	GRCC-MOSC3	exon	True
17	29663664	29663777	NF1	NF1	GRCC-MOSC3	exon	True
17	29663777	29663890	NF1	NF1	GRCC-MOSC3	exon	True
17	29663890	29663961	NF1	NF1	GRCC-MOSC3	exon	True
17	29664380	29664455	NF1	NF1	GRCC-MOSC3	exon	True
17	29664440	29664521	NF1	NF1	GRCC-MOSC3	exon	True
17	29664521	29664595	NF1	NF1	GRCC-MOSC3	exon	True
17	29664595	29664678	NF1	NF1	GRCC-MOSC3	exon	True
17	29664743	29664872	NF1	NF1	GRCC-MOSC3	exon	True
17	29664868	29664938	NF1	NF1	GRCC-MOSC3	exon	True
17	29665047	29665115	NF1	NF1	GRCC-MOSC3	exon	True
17	29665108	29665175	NF1	NF1	GRCC-MOSC3	exon	True
17	29665609	29665731	NF1	NF1	GRCC-MOSC3	exon	True
17	29665731	29665844	NF1	NF1	GRCC-MOSC3	exon	True
17	29667461	29667587	NF1	NF1	GRCC-MOSC3	exon	True
17	29667587	29667671	NF1	NF1	GRCC-MOSC3	exon	True
17	29669990	29670111	NF1	NF1	GRCC-MOSC3	exon	True
17	29670092	29670195	NF1	NF1	GRCC-MOSC3	exon	True
17	29676083	29676199	NF1	NF1	GRCC-MOSC3	exon	True
17	29676173	29676256	NF1	NF1	GRCC-MOSC3	exon	True
17	29676255	29676375	NF1	NF1	GRCC-MOSC3	exon	True
17	29677199	29677287	NF1	NF1	GRCC-MOSC3	exon	True
17	29677264	29677376	NF1	NF1	GRCC-MOSC3	exon	True
17	29679197	29679323	NF1	NF1	GRCC-MOSC3	exon	True
17	29679323	29679411	NF1	NF1	GRCC-MOSC3	exon	True
17	29679417	29679534	NF1	NF1	GRCC-MOSC3	exon	True
17	29683456	29683530	NF1	NF1	GRCC-MOSC3	exon	True
17	29683530	29683625	NF1	NF1	GRCC-MOSC3	exon	True
17	29683957	29684056	NF1	NF1	GRCC-MOSC3	exon	True
17	29684056	29684146	NF1	NF1	GRCC-MOSC3	exon	True
17	29684194	29684302	NF1	NF1	GRCC-MOSC3	exon	True
17	29684302	29684396	NF1	NF1	GRCC-MOSC3	exon	True
17	29685477	29685566	NF1	NF1	GRCC-MOSC3	exon	True
17	29685566	29685660	NF1	NF1	GRCC-MOSC3	exon	True
17	29685958	29686072	NF1	NF1	GRCC-MOSC3	exon	True
17	29687448	29687536	NF1	NF1	GRCC-MOSC3	exon	True
17	29687536	29687638	NF1	NF1	GRCC-MOSC3	exon	True
17	29687637	29687759	NF1	NF1	GRCC-MOSC3	exon	True
17	29701028	29701152	NF1	NF1	GRCC-MOSC3	exon	True
17	29701152	29701267	NF1	NF1	GRCC-MOSC3	exon	True
2	178098716	178098813	NFE2L2	NFE2L2	GRCC-MOSC3	exon	True
2	178098813	178098929	NFE2L2	NFE2L2	GRCC-MOSC3	exon	True
2	178098929	178099014	NFE2L2	NFE2L2	GRCC-MOSC3	exon	True
9	139390686	139390779	NOTCH1	NOTCH1	GRCC-MOSC3	exon	True
9	139390764	139390885	NOTCH1	NOTCH1	GRCC-MOSC3	exon	True
9	139390776	139390885	NOTCH1	NOTCH1	GRCC-MOSC3	exon	True
9	139397724	139397861	NOTCH1	NOTCH1	GRCC-MOSC3	exon	True
9	139397762	139397879	NOTCH1	NOTCH1	GRCC-MOSC3	exon	True
9	139399327	139399458	NOTCH1	NOTCH1	GRCC-MOSC3	exon	True
9	139399337	139399447	NOTCH1	NOTCH1	GRCC-MOSC3	exon	True
1	120458086	120458216	NOTCH2	NOTCH2	GRCC-MOSC3	exon	True
1	120459042	120459172	NOTCH2	NOTCH2	GRCC-MOSC3	exon	True
6	32163212	32163341	NOTCH4	NOTCH4	GRCC-MOSC3	exon	True
6	32163339	32163466	NOTCH4	NOTCH4	GRCC-MOSC3	exon	True
6	32163451	32163580	NOTCH4	NOTCH4	GRCC-MOSC3	exon	True
6	32163579	32163682	NOTCH4	NOTCH4	GRCC-MOSC3	exon	True
6	32163690	32163781	NOTCH4	NOTCH4	GRCC-MOSC3	exon	True
6	32163779	32163907	NOTCH4	NOTCH4	GRCC-MOSC3	exon	True
6	32163896	32164014	NOTCH4	NOTCH4	GRCC-MOSC3	exon	True
6	32164090	32164207	NOTCH4	NOTCH4	GRCC-MOSC3	exon	True
6	32164631	32164742	NOTCH4	NOTCH4	GRCC-MOSC3	exon	True
6	32164742	32164878	NOTCH4	NOTCH4	GRCC-MOSC3	exon	True
6	32165054	32165183	NOTCH4	NOTCH4	GRCC-MOSC3	exon	True
6	32165167	32165286	NOTCH4	NOTCH4	GRCC-MOSC3	exon	True
6	32165279	32165372	NOTCH4	NOTCH4	GRCC-MOSC3	exon	True
6	32166155	32166248	NOTCH4	NOTCH4	GRCC-MOSC3	exon	True
6	32166242	32166337	NOTCH4	NOTCH4	GRCC-MOSC3	exon	True
6	32166406	32166526	NOTCH4	NOTCH4	GRCC-MOSC3	exon	True
6	32166667	32166789	NOTCH4	NOTCH4	GRCC-MOSC3	exon	True
6	32166783	32166891	NOTCH4	NOTCH4	GRCC-MOSC3	exon	True
6	32168560	32168682	NOTCH4	NOTCH4	GRCC-MOSC3	exon	True
6	32168681	32168786	NOTCH4	NOTCH4	GRCC-MOSC3	exon	True
6	32168893	32169003	NOTCH4	NOTCH4	GRCC-MOSC3	exon	True
6	32168992	32169121	NOTCH4	NOTCH4	GRCC-MOSC3	exon	True
6	32169112	32169241	NOTCH4	NOTCH4	GRCC-MOSC3	exon	True
6	32169241	32169351	NOTCH4	NOTCH4	GRCC-MOSC3	exon	True
6	32169809	32169936	NOTCH4	NOTCH4	GRCC-MOSC3	exon	True
6	32169923	32170061	NOTCH4	NOTCH4	GRCC-MOSC3	exon	True
6	32170059	32170181	NOTCH4	NOTCH4	GRCC-MOSC3	exon	True
6	32170181	32170298	NOTCH4	NOTCH4	GRCC-MOSC3	exon	True
6	32170291	32170379	NOTCH4	NOTCH4	GRCC-MOSC3	exon	True
6	32171492	32171623	NOTCH4	NOTCH4	GRCC-MOSC3	exon	True
6	32171622	32171711	NOTCH4	NOTCH4	GRCC-MOSC3	exon	True
6	32171889	32172013	NOTCH4	NOTCH4	GRCC-MOSC3	exon	True
6	32172013	32172124	NOTCH4	NOTCH4	GRCC-MOSC3	exon	True
6	32172119	32172230	NOTCH4	NOTCH4	GRCC-MOSC3	exon	True
6	32178467	32178598	NOTCH4	NOTCH4	GRCC-MOSC3	exon	True
6	32178598	32178728	NOTCH4	NOTCH4	GRCC-MOSC3	exon	True
6	32180209	32180323	NOTCH4	NOTCH4	GRCC-MOSC3	exon	True
6	32180323	32180433	NOTCH4	NOTCH4	GRCC-MOSC3	exon	True
6	32180578	32180710	NOTCH4	NOTCH4	GRCC-MOSC3	exon	True
6	32180908	32181033	NOTCH4	NOTCH4	GRCC-MOSC3	exon	True
6	32181412	32181536	NOTCH4	NOTCH4	GRCC-MOSC3	exon	True
6	32181535	32181624	NOTCH4	NOTCH4	GRCC-MOSC3	exon	True
6	32181871	32182002	NOTCH4	NOTCH4	GRCC-MOSC3	exon	True
6	32181996	32182119	NOTCH4	NOTCH4	GRCC-MOSC3	exon	True
6	32183001	32183099	NOTCH4	NOTCH4	GRCC-MOSC3	exon	True
6	32183099	32183180	NOTCH4	NOTCH4	GRCC-MOSC3	exon	True
6	32184681	32184809	NOTCH4	NOTCH4	GRCC-MOSC3	exon	True
6	32184809	32184922	NOTCH4	NOTCH4	GRCC-MOSC3	exon	True
6	32184929	32185012	NOTCH4	NOTCH4	GRCC-MOSC3	exon	True
6	32185011	32185114	NOTCH4	NOTCH4	GRCC-MOSC3	exon	True
6	32185762	32185899	NOTCH4	NOTCH4	GRCC-MOSC3	exon	True
6	32187327	32187450	NOTCH4	NOTCH4	GRCC-MOSC3	exon	True
6	32187450	32187571	NOTCH4	NOTCH4	GRCC-MOSC3	exon	True
6	32187861	32187968	NOTCH4	NOTCH4	GRCC-MOSC3	exon	True
6	32187965	32188099	NOTCH4	NOTCH4	GRCC-MOSC3	exon	True
6	32188165	32188272	NOTCH4	NOTCH4	GRCC-MOSC3	exon	True
6	32188272	32188357	NOTCH4	NOTCH4	GRCC-MOSC3	exon	True
6	32188343	32188462	NOTCH4	NOTCH4	GRCC-MOSC3	exon	True
6	32188531	32188656	NOTCH4	NOTCH4	GRCC-MOSC3	exon	True
6	32188746	32188882	NOTCH4	NOTCH4	GRCC-MOSC3	exon	True
6	32188874	32188968	NOTCH4	NOTCH4	GRCC-MOSC3	exon	True
6	32188968	32189058	NOTCH4	NOTCH4	GRCC-MOSC3	exon	True
6	32189058	32189135	NOTCH4	NOTCH4	GRCC-MOSC3	exon	True
6	32190231	32190350	NOTCH4	NOTCH4	GRCC-MOSC3	exon	True
6	32190339	32190474	NOTCH4	NOTCH4	GRCC-MOSC3	exon	True
6	32190466	32190557	NOTCH4	NOTCH4	GRCC-MOSC3	exon	True
6	32190784	32190916	NOTCH4	NOTCH4	GRCC-MOSC3	exon	True
6	32191603	32191741	NOTCH4	NOTCH4	GRCC-MOSC3	exon	True
5	170837501	170837616	NPM1	NPM1	GRCC-MOSC3	exon	True
1	115252159	115252285	NRAS	NRAS	GRCC-MOSC3	exon	True
1	115252185	115252269	NRAS	NRAS	GRCC-MOSC3	exon	True
1	115256484	115256613	NRAS	NRAS	GRCC-MOSC3	exon	True
1	115256504	115256584	NRAS	NRAS	GRCC-MOSC3	exon	True
1	115258660	115258792	NRAS	NRAS	GRCC-MOSC3	exon	True
1	115258689	115258774	NRAS	NRAS	GRCC-MOSC3	exon	True
4	55140981	55141103	PDGFRA	PDGFRA	GRCC-MOSC3	exon	True
4	55140986	55141112	PDGFRA	PDGFRA	GRCC-MOSC3	exon	True
4	55144085	55144193	PDGFRA	PDGFRA	GRCC-MOSC3	exon	True
4	55144101	55144195	PDGFRA	PDGFRA	GRCC-MOSC3	exon	True
4	55144528	55144660	PDGFRA	PDGFRA	GRCC-MOSC3	exon	True
4	55144538	55144653	PDGFRA	PDGFRA	GRCC-MOSC3	exon	True
4	55152014	55152147	PDGFRA	PDGFRA	GRCC-MOSC3	exon	True
4	55152024	55152154	PDGFRA	PDGFRA	GRCC-MOSC3	exon	True
3	178916716	178916825	PIK3CA	PIK3CA	GRCC-MOSC3	exon	True
3	178916775	178916881	PIK3CA	PIK3CA	GRCC-MOSC3	exon	True
3	178916825	178916907	PIK3CA	PIK3CA	GRCC-MOSC3	exon	True
3	178916897	178917006	PIK3CA	PIK3CA	GRCC-MOSC3	exon	True
3	178916931	178917035	PIK3CA	PIK3CA	GRCC-MOSC3	exon	True
3	178921449	178921575	PIK3CA	PIK3CA	GRCC-MOSC3	exon	True
3	178921464	178921570	PIK3CA	PIK3CA	GRCC-MOSC3	exon	True
3	178927405	178927525	PIK3CA	PIK3CA	GRCC-MOSC3	exon	True
3	178927901	178927986	PIK3CA	PIK3CA	GRCC-MOSC3	exon	True
3	178928069	178928160	PIK3CA	PIK3CA	GRCC-MOSC3	exon	True
3	178936017	178936105	PIK3CA	PIK3CA	GRCC-MOSC3	exon	True
3	178936023	178936105	PIK3CA	PIK3CA	GRCC-MOSC3	exon	True
3	178938787	178938918	PIK3CA	PIK3CA	GRCC-MOSC3	exon	True
3	178947818	178947896	PIK3CA	PIK3CA	GRCC-MOSC3	exon	True
3	178951824	178951942	PIK3CA	PIK3CA	GRCC-MOSC3	exon	True
3	178951942	178952063	PIK3CA	PIK3CA	GRCC-MOSC3	exon	True
3	178951996	178952097	PIK3CA	PIK3CA	GRCC-MOSC3	exon	True
3	178952063	178952155	PIK3CA	PIK3CA	GRCC-MOSC3	exon	True
3	178952140	178952237	PIK3CA	PIK3CA	GRCC-MOSC3	exon	True
5	67589554	67589643	PIK3R1	PIK3R1	GRCC-MOSC3	exon	True
5	67589557	67589656	PIK3R1	PIK3R1	GRCC-MOSC3	exon	True
5	67590953	67591073	PIK3R1	PIK3R1	GRCC-MOSC3	exon	True
5	67591063	67591187	PIK3R1	PIK3R1	GRCC-MOSC3	exon	True
5	67591987	67592068	PIK3R1	PIK3R1	GRCC-MOSC3	exon	True
5	67592066	67592178	PIK3R1	PIK3R1	GRCC-MOSC3	exon	True
5	67593191	67593293	PIK3R1	PIK3R1	GRCC-MOSC3	exon	True
5	67593293	67593400	PIK3R1	PIK3R1	GRCC-MOSC3	exon	True
5	67593400	67593529	PIK3R1	PIK3R1	GRCC-MOSC3	exon	True
19	52715922	52716030	PPP2R1A	PPP2R1A	GRCC-MOSC3	exon	True
19	52716205	52716337	PPP2R1A	PPP2R1A	GRCC-MOSC3	exon	True
10	89624207	89624300	PTEN	PTEN	GRCC-MOSC3	exon	True
10	89624207	89624322	PTEN	PTEN	GRCC-MOSC3	exon	True
10	89653751	89653818	PTEN	PTEN	GRCC-MOSC3	exon	True
10	89653816	89653930	PTEN	PTEN	GRCC-MOSC3	exon	True
10	89685244	89685357	PTEN	PTEN	GRCC-MOSC3	exon	True
10	89685258	89685374	PTEN	PTEN	GRCC-MOSC3	exon	True
10	89690819	89690917	PTEN	PTEN	GRCC-MOSC3	exon	True
10	89692713	89692819	PTEN	PTEN	GRCC-MOSC3	exon	True
10	89692813	89692920	PTEN	PTEN	GRCC-MOSC3	exon	True
10	89692819	89692920	PTEN	PTEN	GRCC-MOSC3	exon	True
10	89692920	89693032	PTEN	PTEN	GRCC-MOSC3	exon	True
10	89711804	89711932	PTEN	PTEN	GRCC-MOSC3	exon	True
10	89711811	89711894	PTEN	PTEN	GRCC-MOSC3	exon	True
10	89711894	89712017	PTEN	PTEN	GRCC-MOSC3	exon	True
10	89717503	89717620	PTEN	PTEN	GRCC-MOSC3	exon	True
10	89717579	89717695	PTEN	PTEN	GRCC-MOSC3	exon	True
10	89717666	89717780	PTEN	PTEN	GRCC-MOSC3	exon	True
10	89717694	89717792	PTEN	PTEN	GRCC-MOSC3	exon	True
[truncated: 555,051+ more rows]
